# Supplementary material
Source: PubMed Central journal article supplement (PMC5067155)
Supplement: NIHMS817166-supplement-Supplemental_infomration_1.pdf [file NIHMS817166-supplement-Supplemental_infomration_1.pdf]

Genomic diversity of EPEC associated with clinical presentations of differing severity

## RESULTS

### Distribution of EPEC virulence-associated genes

The T6SS have been previously demonstrated to contribute to the pathogenic mechanism of other enteric bacteria such as *V. cholerae*<sup>1</sup>. The T6SS genes have been detected *in silico* in the genomes of diverse *E. coli* including EPEC<sup>2,3</sup>; however, their role in EPEC virulence is currently undefined. The occurrence of T6SS genes among diverse AEEC genomes, and the presence of two distinct T6SS gene clusters in the genome of the EPEC2 prototype isolate B171 and other genomes of the EPEC2 phylogenomic lineage has recently been described<sup>3,4</sup>. Interestingly, the genomes of the EPEC7 lineage, which is within *E. coli* phylogroup B1 with EPEC2, contain only a single T6SS gene cluster. Additional genomes sequenced in the current study that were not classified into defined lineages but contained genes with similarity to T6SS genes were present only in isolates of *E. coli* phylogroup B1 (Table S1). In contrast, the genomes of the EPEC1, EPEC4, EPEC8, and EPEC9 lineages, which are all present in *E. coli* phylogroup B2, did not contain any T6SS homologs. Overall, the presence or absence of the secretion system genes and known virulence genes follows the whole genome phylogenomic distribution and provides additional clues to the variable virulence gene repertoire likely involved in the pathogenic mechanisms in this group of organisms (Table S1).

The four newly described EPEC lineages in this study exhibited lineage-specific distributions of known virulence-associated genes including the T3SS effectors (Table S1), which was previously described using a more historical collection of EPEC isolates<sup>4</sup>. Meanwhile the T3SS effectors identified in the two EPEC genomes that were present in *E. coli* phylogroup E, and were both *bfp*- (Fig. 1), exhibited greater similarity to effectors of the O157:H7 EHEC isolate Sakai than to the effectors of the prototype EPEC1 and EPEC2 isolates (Fig. S2, Table S1).

### **EPEC-specific genes associated with different clinical outcomes**

Hierarchical cluster analysis of the 246 gene clusters that were more frequently associated with symptomatic or asymptomatic EPEC isolates in the analysis with the decreased threshold and filtering for genes that are present or absent in the commensal isolate placed nearly all of the genomes into two large groups, with the exception of five genomes that were not in any of the EPEC phylogenomic clades (Fig. S5). The larger group designated, group I in Figure S5 contained 48 EPEC isolates, of which 40 (83%) were from symptomatic outcomes (LI or NSI) and only eight (17%) from asymptomatic outcomes. Meanwhile, group II in Figure S5 was comprised of 17 EPEC isolates, with seven (41%) from symptomatic outcomes and 10 (59%) from asymptomatic outcomes (Fig. S5). Within group I, sub-groups of EPEC isolates from the same phylogenomic lineages could be identified; however, group II contained a mixture of EPEC isolates from each of the three *E. coli* phylogroups (A, B1, B2) and multiple EPEC phylogenomic lineages. In contrast, hierarchical cluster analysis of the 141 gene clusters that were significantly associated with symptomatic or asymptomatic genomes when analyzing

only the 61 tEPEC isolates at this decreased threshold separated the genomes into two large and similarly sized groups (Fig. S6). In group I there were 34 EPEC isolate genomes consisting of 20 (59%) from symptomatic outcomes, and 14 (41%) from asymptomatic outcomes (Fig. S6). Meanwhile, group II contained 27 EPEC isolate genomes consisting of 24 (89%) from symptomatic outcomes, and three (11%) from asymptomatic outcomes (Fig. S6). Within each of these groups, the genomes formed sub-groups by phylogenomic lineage (Fig. S6). The genomes of group I primarily belonged to *E. coli* phylogroup B2, while the genomes of group II belonged to *E. coli* phylogroups B1 and A (Fig. S6). Overall, these gene-based comparisons demonstrate there is considerable phylogroup- and lineage-specificity of EPEC genomic content, which raises the question of how much variation exists in the survival and virulence mechanisms of these EPEC isolates.

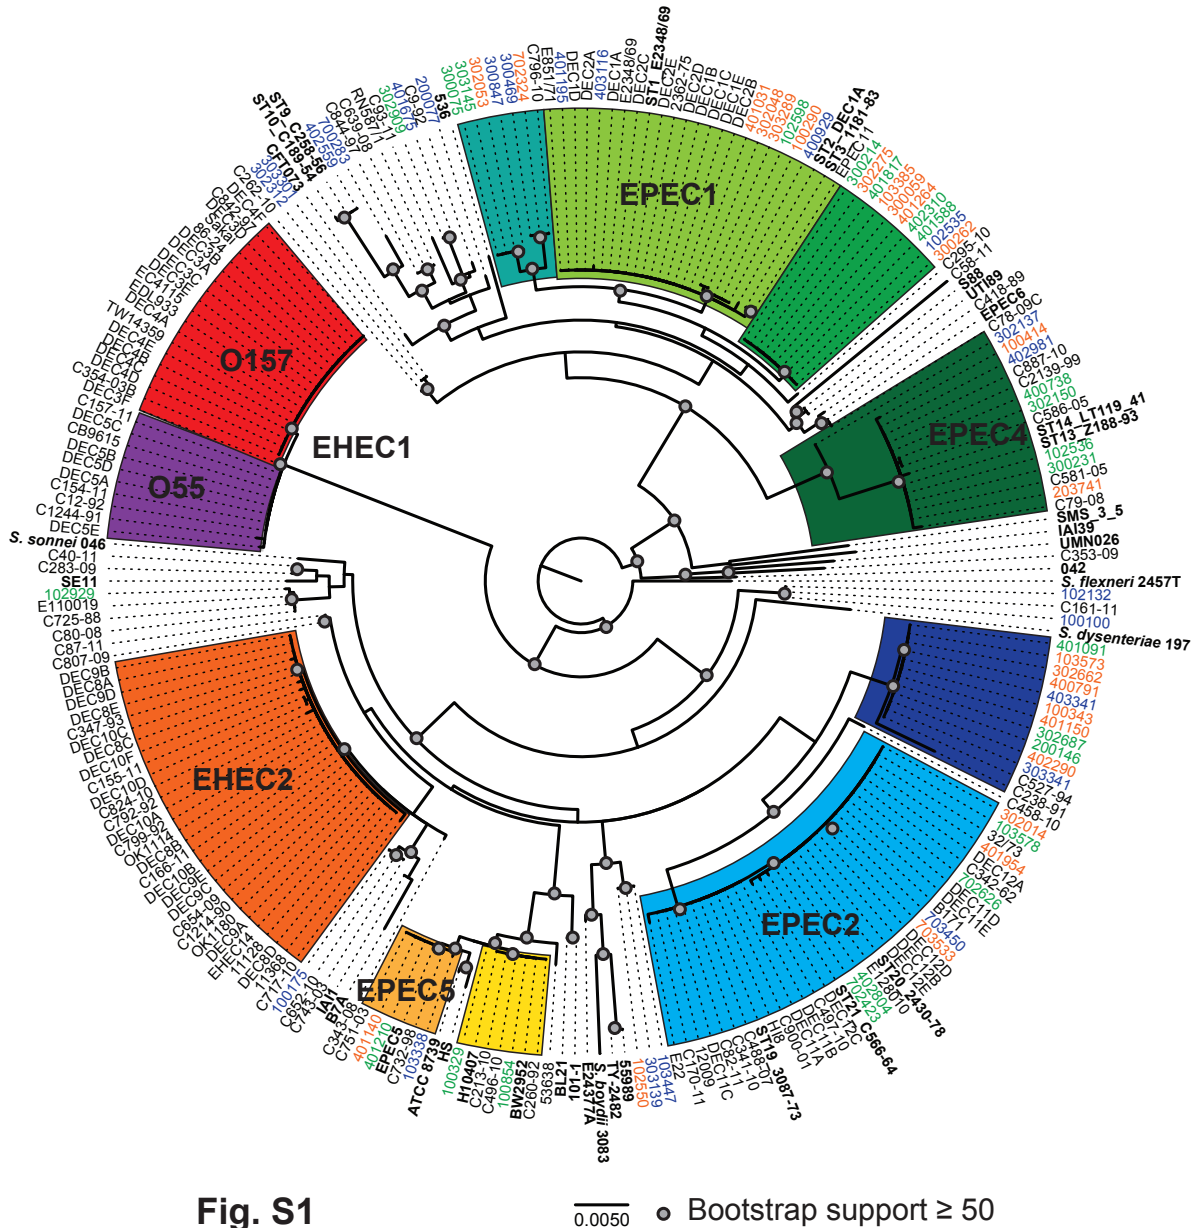

**Figure S1. Housekeeping gene-based phylogenetic analysis.** A phylogenetic analysis of the 70 EPEC isolates characterized in this study with a collection of previously sequenced EPEC<sup>4</sup> and other *E. coli* isolates constructed from a concatenation of the MLST loci of the <http://shigatox.net/new/tools/ecmlst.html> MLST scheme<sup>5</sup>. A maximum-likelihood phylogeny was constructed using RAxML v7.2.8<sup>6</sup> and





in each EPEC genome analyzed were compared by hierarchical clustering<sup>8</sup> using Pearson correlation with average linkage, performed using MeV<sup>9</sup>. Each column represents one of the 70 EPEC genomes analyzed with the phylogenomic lineages designated by colored rectangles and the clinical outcome each EPEC isolate was associated with is indicated by a orange (lethal, LI), green (non-lethal symptomatic, NSI), or blue (asymptomatic, AI) square. Each row represents one of the previously characterized T3SS effectors of the EPEC strain E2348/69 (green label on the right side)<sup>10</sup>, EPEC strain B171 (blue label on the right side)<sup>11,12</sup>, and EHEC O157:H7 strain Sakai (red label on the right side)<sup>13</sup>. The presence of *bfpA* in each of the genomes is indicated by a star symbol above the clinical presentation of each isolate.

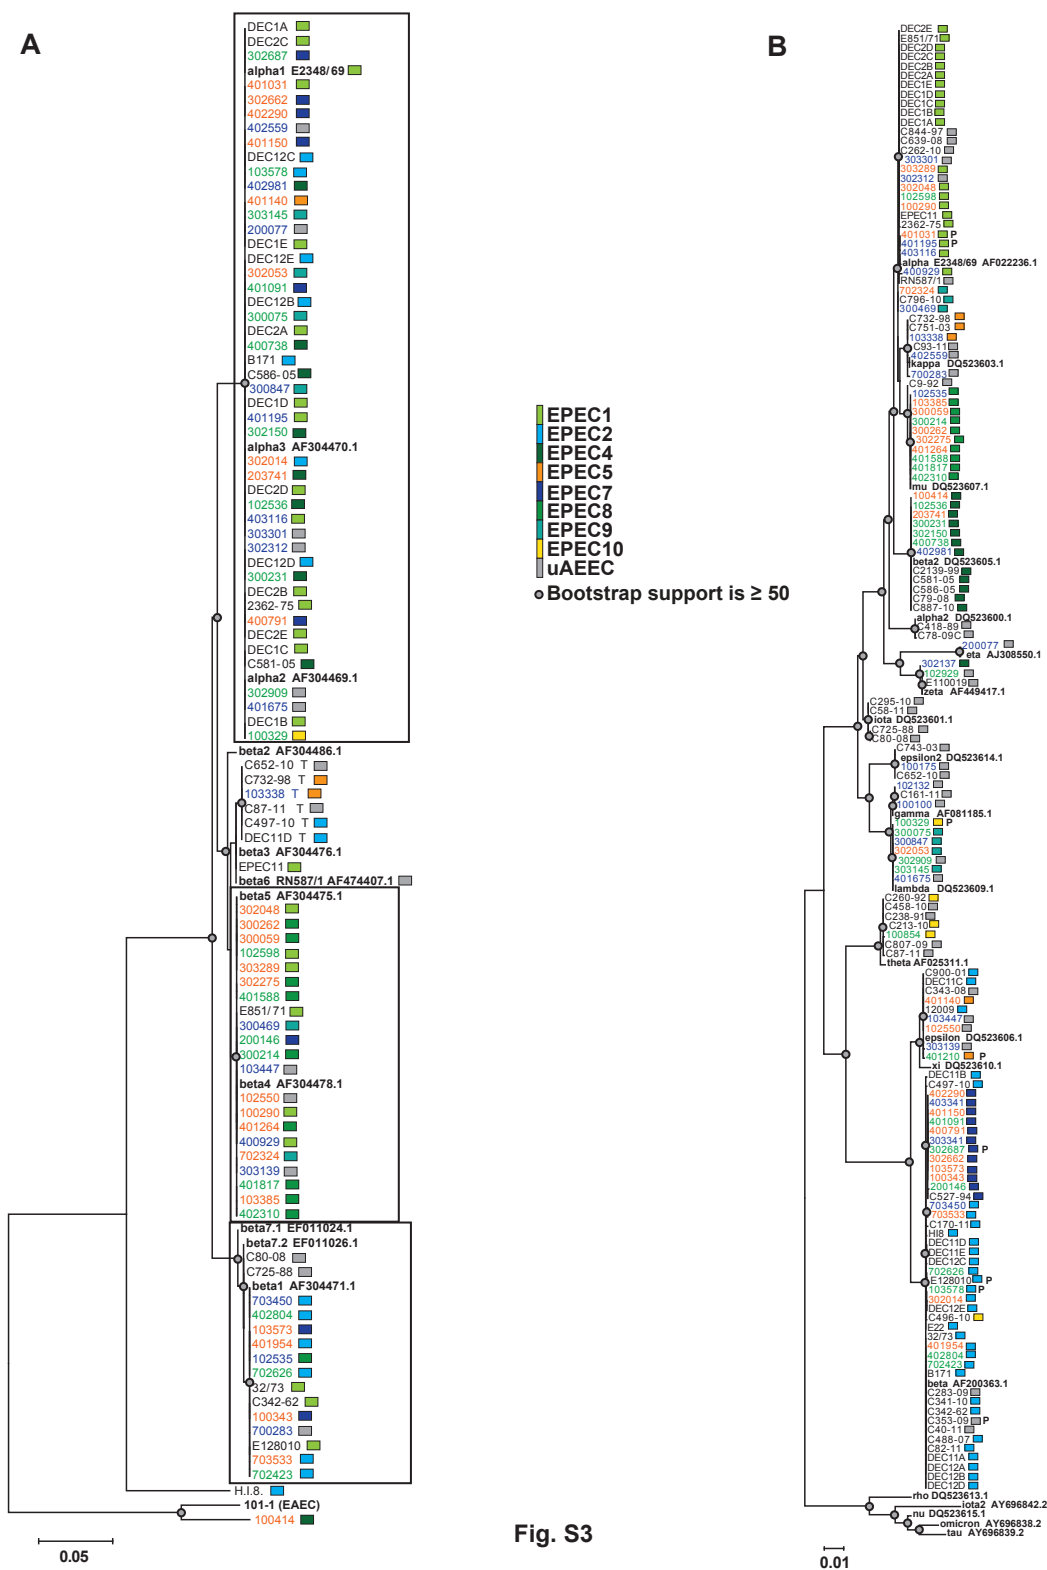

Fig. S3

Figure S3. Phylogenetic analysis of A) *bfpA*, and B) *eae* nucleotide sequences from the EPEC genomes analyzed in this study and those from a recent study<sup>4</sup>.

Sequences of *eae* alleles<sup>14</sup> and *bfpA* alleles<sup>5,15</sup> that were previously described are included as references and their respective GenBank accession numbers are indicated. The *eae* and *bfpA* sequences that could be identified by *in silico* analysis of each genome were aligned using the ClustalW<sup>16</sup> algorithm in MEGA5<sup>17</sup>. A maximum-likelihood phylogeny was constructed using the Kimura 2-parameter model with 1,000 bootstrap replications in MEGA5<sup>17</sup>. Clinical outcomes of the isolates are designated as follows: lethal infections (LI) are indicated in orange, while those from non-lethal symptomatic infections (NSI) are indicated in green, and isolates from asymptomatic infections (AI) are indicated in blue. The colored box next to each sequence indicates the phylogenomic lineage of the EPEC isolate that each *eae* or *bfpA* allele was obtained from, and the color designations are indicated in the Figure. A “T” indicates a genome that contained a truncated *bfpA* sequence. A “P” indicates a genome contained a partial *perA* sequence.



**Figure S4. Hierarchical cluster analysis of the 258 LS-BSR gene clusters that were significantly (chi-squared or Fisher's exact test,  $p < 0.05$ ) more associated with genomes of symptomatic (LI and NSI) compared to asymptomatic (AI) cases for the 61 typical EPEC genomes analyzed.** The LS-BSR gene clusters, generated using a clustering threshold of 90% nucleotide identity, that were significantly (chi-squared or Fisher's exact test  $p$ -value  $< 0.05$ ) associated with genomes of symptomatic compared to asymptomatic cases, were compared by hierarchical clustering<sup>8</sup>. Hierarchical clustering with Pearson correlation and average linkage was performed using MeV<sup>9</sup>. Each column represents a genome, while each row is an LS-BSR gene cluster. The gene clusters that were present with an LS-BSR value  $\geq 0.9$  are indicated in blue, while the gene clusters that were absent (LS-BSR value  $< 0.9$ ) are white. The red boxes indicate three groups of genomes that are designated I and II. The red asterisks identify nodes that separate the genomes into the three groups. The color-coded rectangles at the top of the plot denote the phylogenomic lineage, and the color-coded squares indicate the clinical outcome of each isolate. The color-coding of each symbol is in the box at the top of the figure.



**Figure S5. Identification of EPEC-specific factors when compared with commensal isolates.** The plot is a hierarchical cluster analysis of the 246 LS-BSR gene clusters that were significantly (chi-square test or Fisher's exact test,  $p < 0.05$ ) more prevalent in genomes of symptomatic (LI and NSI) compared to asymptomatic (AI) cases for all 70 EPEC genomes analyzed when using a more inclusive clustering threshold of 80% nucleotide identity. The genes were significantly (chi-square test or Fisher's exact test  $p$ -value  $< 0.05$ ) associated with genomes of symptomatic compared to asymptomatic cases. These gene clusters were also determined to be absent (LS-BSR value  $< 0.8$ ) from three *E. coli* commensal isolates (HS, NC\_009800.1; K-12, NC\_000913.3; and SE11, NC\_011415.1), indicating they are likely unique to EPEC or other related pathogenic *E. coli*. Hierarchical clustering<sup>8</sup> with Pearson correlation and average linkage was performed using MeV<sup>9</sup>. Each column represents a genome, while each row is an LS-BSR gene cluster. The gene clusters that were present with an LS-BSR value  $\geq 0.8$  are indicated in blue, while the gene clusters that were absent (LS-BSR value  $< 0.8$ ) are white. The red boxes indicate two groups of genomes that are designated I and II, and the red asterisks identify the nodes that separate the genomes into the two main groups. The color-coded rectangles at the top of the plot denote the phylogenomic lineage, and the color-coded squares indicate the clinical outcome of each isolate. The color-coding of each symbol is in the box at the top of the figure. A star symbol denotes the presence of *bfpA* in each genome.



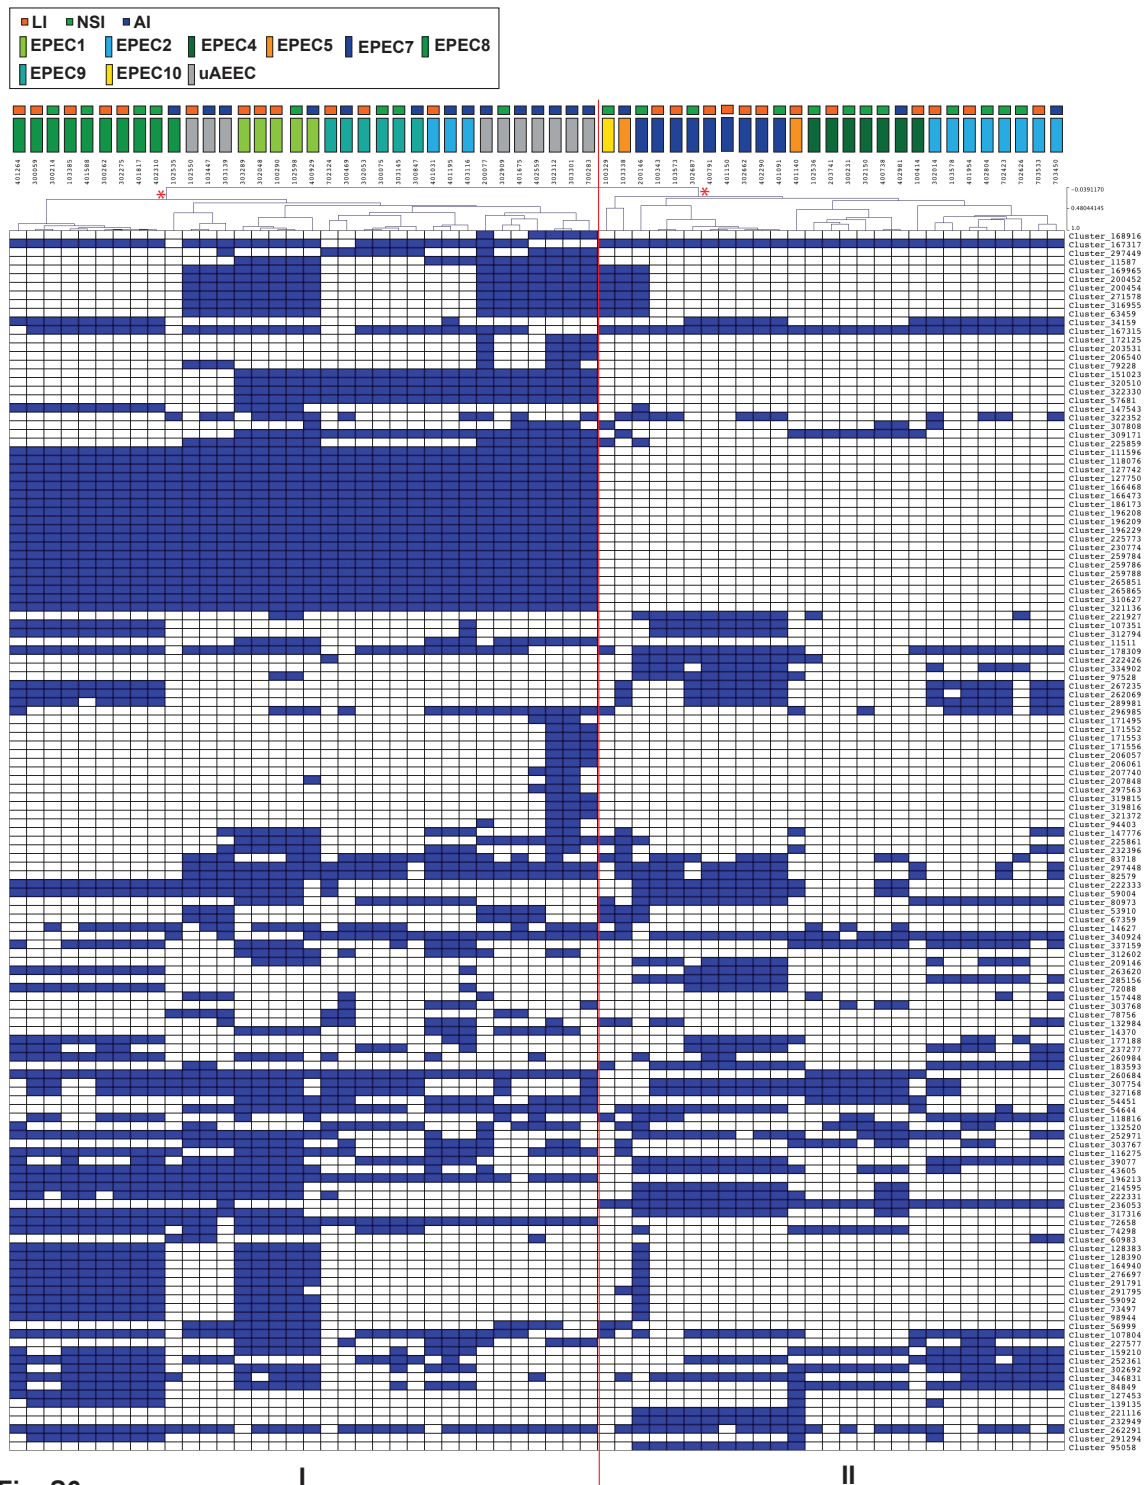

Fig. S6

**Figure S6. Identification of tEPEC-specific factors when compared with commensal isolates.** The plot is a hierarchical cluster analysis of the 141 tEPEC-specific LS-BSR gene clusters that were significantly (chi-squared or Fisher's exact test,

$p < 0.05$ ) more prevalent in genomes of symptomatic (LI and NSI) compared to asymptomatic (AI) cases for the 61 typical EPEC genomes analyzed. Hierarchical clustering was used to compare the LS-BSR gene clusters, generated using a more inclusive clustering threshold of 80% nucleotide identity, that were significantly (chi-squared or Fisher's exact test  $p$ -value  $< 0.05$ ) associated with genomes of symptomatic compared to asymptomatic cases. These gene clusters were also determined to be absent (LS-BSR value  $< 0.8$ ) from three *E. coli* commensal isolates (HS, NC\_009800.1; K-12, NC\_000913.3; and SE11, NC\_011415.1), indicating they are likely unique to EPEC or other related pathogenic *E. coli*. Hierarchical clustering<sup>8</sup> with Pearson correlation and average linkage was performed using MeV<sup>9</sup>. Each column represents a genome, while each row is an LS-BSR gene cluster. The gene clusters that were present with an LS-BSR value  $\geq 0.8$  are indicated in blue, while the gene clusters that were absent (LS-BSR value  $< 0.8$ ) are white. The red boxes indicate two groups of genomes that are designated I and II. The red asterisks identify nodes that separate the genomes into the two main groups. The color-coded rectangles at the top of the plot denote the phylogenomic lineage, and the color-coded squares indicate the clinical outcome of each isolate. The color-coding of each symbol is in the box at the top of the figure.

## References

1. Pukatzki, S. *et al.* Identification of a conserved bacterial protein secretion system in *Vibrio cholerae* using the *Dictyostelium* host model system. *Proc. Natl. Acad. Sci. USA* **103**, 1528-33 (2006).
2. Shrivastava, S. & Mande, S.S. Identification and functional characterization of gene components of Type VI Secretion system in bacterial genomes. *PLoS One* **3**, e2955 (2008).
3. Boyer, F., Fichant, G., Berthod, J., Vandenbrouck, Y. & Attree, I. Dissecting the bacterial type VI secretion system by a genome wide *in silico* analysis: what can be learned from available microbial genomic resources? *BMC Genomics* **10**, 104 (2009).
4. Hazen, T.H. *et al.* Refining the pathovar paradigm via phylogenomics of the attaching and effacing *Escherichia coli*. *Proc Natl Acad Sci USA* **110**, 12810-5 (2013).
5. Lacher, D.W., Steinsland, H., Blank, T.E., Donnenberg, M.S. & Whittam, T.S. Molecular evolution of typical enteropathogenic *Escherichia coli*: clonal analysis by multilocus sequence typing and virulence gene allelic profiling. *J. Bacteriol.* **189**, 342-50 (2007).
6. Stamatakis, A. RAxML-VI-HPC: maximum likelihood-based phylogenetic analyses with thousands of taxa and mixed models. *Bioinformatics* **22**, 2688-90 (2006).
7. Tennant, S.M. *et al.* Characterisation of atypical enteropathogenic *E. coli* strains of clinical origin. *BMC Microbiol.* **9**, 117 (2009).
8. Eisen, M.B., Spellman, P.T., Brown, P.O. & Botstein, D. Cluster analysis and display of genome-wide expression patterns. *Proc. Natl. Acad. Sci. USA* **95**, 14863-8 (1998).
9. Saeed, A.I. *et al.* TM4 microarray software suite. *Methods Enzymol.* **411**, 134-93 (2006).
10. Iguchi, A. *et al.* Complete genome sequence and comparative genome analysis of enteropathogenic *Escherichia coli* O127:H6 strain E2348/69. *J. Bacteriol.* **191**, 347-54 (2009).
11. Ogura, Y. *et al.* Systematic identification and sequence analysis of the genomic islands of the enteropathogenic *Escherichia coli* strain B171-8 by the combined use of whole-genome PCR scanning and fosmid mapping. *J Bacteriol* **190**, 6948-60 (2008).
12. Rasko, D.A. *et al.* The pangenome structure of *Escherichia coli*: comparative genomic analysis of *E. coli* commensal and pathogenic isolates. *J. Bacteriol.* **190**, 6881-93 (2008).
13. Tobe, T. *et al.* An extensive repertoire of type III secretion effectors in *Escherichia coli* O157 and the role of lambdoid phages in their dissemination. *Proc Natl Acad Sci USA* **103**, 14941-6 (2006).
14. Lacher, D.W., Steinsland, H. & Whittam, T.S. Allelic subtyping of the intimin locus (*eae*) of pathogenic *Escherichia coli* by fluorescent RFLP. *FEMS Microbiol. Lett.* **261**, 80-7 (2006).

15. Blank, T.E., Zhong, H., Bell, A.L., Whittam, T.S. & Donnenberg, M.S. Molecular variation among type IV pilin (*bfpA*) genes from diverse enteropathogenic *Escherichia coli* strains. *Infect. Immun.* **68**, 7028-38 (2000).
16. Thompson, J.D., Higgins, D.G. & Gibson, T.J. CLUSTAL W: improving the sensitivity of progressive multiple sequence alignment through sequence weighting, position-specific gap penalties and weight matrix choice. *Nucleic Acids Res.* **22**, 4673-80 (1994).
17. Kumar, S., Nei, M., Dudley, J. & Tamura, K. MEGA: a biologist-centric software for evolutionary analysis of DNA and protein sequences. *Brief. Bioinf.* **9**, 299-306 (2008).

## List of Supplemental Tables and Data Sets

**Table S1.** Prevalence of virulence-associated genes among the EPEC genomes sequenced in this study by phylogenomic lineage and symptomatic group.

**Table S2.** Genes identified by LS-BSR that were significantly correlated with LI, NSI, or AI clinical outcomes for all 70 EPEC genomes analyzed using a stringent gene clustering threshold of  $\geq 90\%$ .

**Table S3.** Genes identified by LS-BSR that were significantly correlated with LI, NSI, or AI clinical outcomes for the 61 typical EPEC genomes analyzed using a stringent gene clustering threshold of  $\geq 90\%$ .

**Table S4.** Genes identified by LS-BSR that were significantly correlated with symptomatic, asymptomatic, lethal, or non-lethal clinical outcomes for all 70 EPEC genomes analyzed using a stringent gene clustering threshold of  $\geq 90\%$ .

**Table S5.** Genes identified by LS-BSR that were significantly correlated with symptomatic, asymptomatic, lethal, or non-lethal clinical outcomes for the 61 typical EPEC genomes analyzed using a stringent clustering threshold of  $\geq 90\%$ .

**Table S6.** Genes identified by LS-BSR that were significantly correlated with one clinical outcome over another for all 70 EPEC genomes analyzed using an inclusive clustering threshold of  $\geq 80\%$ .

**Table S7.** Genes identified by LS-BSR that were significantly correlated with one clinical outcome over another for the 61 typical EPEC genomes analyzed using an inclusive clustering threshold of  $\geq 80\%$ .

**Table S8.** Genes identified by LS-BSR that were significantly correlated with symptomatic, asymptomatic, lethal, or non-lethal clinical outcomes for all 70 EPEC genomes analyzed using an inclusive clustering threshold of  $\geq 80\%$ .

**Table S9.** Genes identified by LS-BSR that were significantly correlated with symptomatic, asymptomatic, lethal, or non-lethal clinical outcomes for the 61 typical EPEC genomes analyzed using an inclusive clustering threshold of  $\geq 80\%$ .

**Table S10.** The number of LS-BSR gene clusters with a predicted protein that contained a protein domain of surface-associated or secreted proteins.

**Data Set S1.** Nucleotide sequences of the 12,964 LS-BSR gene clusters identified for the 70 EPEC genomes analyzed using a stringent gene clustering threshold of  $\geq 90\%$ .

**Data Set S2.** Nucleotide sequences of the 12,196 LS-BSR gene clusters identified for the 70 EPEC genomes and three commensal *E. coli* genomes analyzed using an inclusive gene clustering threshold of  $\geq 80\%$ .

**Table S1.** Prevalence of virulence-associated genes among the EPEC genomes sequenced in this study by phylogenomic lineage and symptomatic group

| Phylogenomic Lineage | Clinical Outcome | Specimen ID | EAF Plasmid |             | T3SS Effectors         |                    |                            | T6SS                 |              |              |        |      |
|----------------------|------------------|-------------|-------------|-------------|------------------------|--------------------|----------------------------|----------------------|--------------|--------------|--------|------|
|                      |                  |             | BFP         | <i>perA</i> | EPEC1 (E2348/69, n=21) | EPEC2 (B171, n=26) | O157:H7 EHEC (Sakai, n=49) | T2SS (E2348/69)      | T6SSA (B171) | T6SSM (B171) | OI-122 |      |
| EPEC1                | LI               | 100290      | +           | +           | 19 (90)                | 14 (54)            | 16 (33)                    | +                    | -            | -            | +      |      |
| EPEC1                | LI               | 302048      | +           | +           | 19 (90)                | 13 (50)            | 15 (31)                    | +                    | -            | -            | +      |      |
| EPEC1                | LI               | 303289      | +           | -           | 18 (86)                | 13 (50)            | 14 (29)                    | +                    | -            | -            | +      |      |
| EPEC1                | LI               | 401031      | +           | -           | 19 (90)                | 8 (31)             | 12 (24)                    | +                    | -            | -            | +      |      |
| EPEC1                | NSI              | 102598      | +           | +           | 19 (90)                | 14 (54)            | 16 (33)                    | +                    | -            | -            | +      |      |
| EPEC1                | AI               | 401195      | +           | -           | 17 (81)                | 11 (52)            | 13 (27)                    | +                    | -            | -            | 2 & 3  |      |
| EPEC1                | AI               | 403116      | +           | +           | 20 (95)                | 13 (50)            | 15 (31)                    | +                    | -            | -            | 2 & 3  |      |
| EPEC1                | AI               | 400929      | +           | +           | 20 (95)                | 13 (50)            | 15 (31)                    | +                    | -            | -            | 2 & 3  |      |
|                      |                  |             |             |             |                        |                    |                            | No. Genomes Positive | 8            | 0            | 0      | 5    |
|                      |                  |             |             |             |                        |                    |                            | Prevalence (%)       | 100          | 0            | 0      | 62.5 |
| EPEC2                | LI               | 302014      | +           | +           | 9 (43)                 | 23 (88)            | 17 (35)                    | -                    | +            | +            | +      |      |
| EPEC2                | LI               | 401954      | +           | +           | 8 (38)                 | 22 (85)            | 15 (31)                    | -                    | +            | +            | +      |      |
| EPEC2                | LI               | 703533      | +           | -           | 1 (5)                  | 9 (35)             | 4 (8)                      | -                    | +            | +            | 1      |      |
| EPEC2                | NSI              | 103578      | +           | -           | 4 (19)                 | 16 (62)            | 7 (14)                     | -                    | +            | +            | 1      |      |
| EPEC2                | NSI              | 402804      | +           | +           | 9 (43)                 | 24 (92)            | 18 (37)                    | -                    | +            | +            | +      |      |
| EPEC2                | NSI              | 702423      | +           | +           | 9 (43)                 | 23 (88)            | 16 (33)                    | -                    | +            | +            | +      |      |
| EPEC2                | NSI              | 702626      | +           | +           | 6 (29)                 | 22 (85)            | 15 (31)                    | -                    | +            | +            | +      |      |
| EPEC2                | AI               | 703450      | +           | +           | 8 (38)                 | 23 (88)            | 15 (31)                    | -                    | +            | +            | +      |      |
|                      |                  |             |             |             |                        |                    |                            | No. Genomes Positive | 0            | 8            | 8      | 6    |
|                      |                  |             |             |             |                        |                    |                            | Prevalence (%)       | 0            | 100          | 100    | 75   |
| EPEC4                | LI               | 100414      | +           | -           | 13 (62)                | 8 (31)             | 8 (16)                     | +                    | -            | -            | -      |      |
| EPEC4                | LI               | 203741      | +           | -           | 3 (14)                 | 1 (4)              | 1 (2)                      | +                    | -            | -            | -      |      |
| EPEC4                | NSI              | 102536      | +           | +           | 10 (48)                | 16 (62)            | 11 (22)                    | +                    | -            | -            | -      |      |
| EPEC4                | NSI              | 302150      | +           | +           | 7 (33)                 | 6 (23)             | 6 (12)                     | +                    | -            | -            | -      |      |
| EPEC4                | NSI              | 300231      | +           | +           | 9 (43)                 | 12 (46)            | 8 (16)                     | +                    | -            | -            | -      |      |
| EPEC4                | NSI              | 400738      | +           | +           | 9 (43)                 | 13 (50)            | 11 (22)                    | +                    | -            | -            | -      |      |
| EPEC4                | AI               | 302137      | -           | -           | 9 (43)                 | 5 (19)             | 5 (10)                     | +                    | -            | -            | -      |      |
| EPEC4                | AI               | 402981      | +           | +           | 9 (43)                 | 13 (50)            | 11 (22)                    | +                    | -            | -            | -      |      |
|                      |                  |             |             |             |                        |                    |                            | No. Genomes Positive | 8            | 0            | 0      | 0    |
|                      |                  |             |             |             |                        |                    |                            | Prevalence (%)       | 100          | 0            | 0      | 0    |
| EPEC5                | LI               | 401140      | +           | -           | 7 (33)                 | 17 (65)            | 10 (20)                    | +                    | -            | -            | -      |      |
| EPEC5                | NSI              | 401210      | -           | -           | 0 (0)                  | 1 (4)              | 0 (0)                      | +                    | -            | -            | -      |      |
| EPEC5                | AI               | 103338      | T           | +           | 15 (71)                | 14 (54)            | 19 (39)                    | -                    | +            | -            | -      |      |
|                      |                  |             |             |             |                        |                    |                            | No. Genomes Positive | 2            | 1            | 0      | 0    |
|                      |                  |             |             |             |                        |                    |                            | Prevalence (%)       | 66.7         | 33.3         | 0      | 0    |
| EPEC7                | LI               | 100343      | +           | -           | 10 (48)                | 20 (77)            | 19 (39)                    | +                    | +            | -            | 2 & 3  |      |
| EPEC7                | LI               | 103573      | +           | +           | 10 (48)                | 20 (77)            | 19 (39)                    | +                    | +            | -            | 2 & 3  |      |
| EPEC7                | LI               | 302662      | +           | +           | 10 (48)                | 19 (73)            | 19 (39)                    | +                    | +            | -            | 2 & 3  |      |
| EPEC7                | LI               | 400791      | +           | -           | 10 (48)                | 20 (77)            | 19 (39)                    | +                    | +            | -            | 2 & 3  |      |
| EPEC7                | LI               | 402290      | +           | +           | 10 (48)                | 19 (73)            | 20 (41)                    | +                    | +            | -            | 2 & 3  |      |
| EPEC7                | LI               | 401150      | +           | +           | 10 (48)                | 20 (77)            | 20 (41)                    | +                    | +            | -            | 2 & 3  |      |
| EPEC7                | NSI              | 200146      | +           | +           | 11 (52)                | 20 (77)            | 21 (43)                    | +                    | +            | -            | 2 & 3  |      |
| EPEC7                | NSI              | 302687      | +           | -           | 3 (14)                 | 11 (52)            | 6 (12)                     | +                    | +            | -            | -      |      |
| EPEC7                | NSI              | 401091      | +           | +           | 10 (48)                | 20 (77)            | 19 (39)                    | +                    | +            | -            | 2 & 3  |      |
| EPEC7                | AI               | 303341      | -           | -           | 10 (48)                | 15 (58)            | 14 (29)                    | +                    | +            | -            | 2 & 3  |      |
| EPEC7                | AI               | 403341      | -           | -           | 12 (57)                | 19 (73)            | 20 (41)                    | +                    | +            | -            | 2 & 3  |      |
|                      |                  |             |             |             |                        |                    |                            | No. Genomes Positive | 11           | 11           | 0      | 0    |
|                      |                  |             |             |             |                        |                    |                            | Prevalence (%)       | 100          | 100          | 0      | 0    |
| EPEC8                | LI               | 103385      | +           | +           | 15 (71)                | 11 (52)            | 10 (20)                    | +                    | -            | -            | -      |      |
| EPEC8                | LI               | 300059      | +           | +           | 3 (14)                 | 9 (35)             | 9 (18)                     | +                    | -            | -            | -      |      |
| EPEC8                | LI               | 300262      | +           | +           | 15 (71)                | 13 (50)            | 13 (27)                    | +                    | -            | -            | -      |      |
| EPEC8                | LI               | 302275      | +           | +           | 15 (71)                | 13 (50)            | 13 (27)                    | +                    | -            | -            | -      |      |
| EPEC8                | LI               | 401264      | +           | -           | 15 (71)                | 12 (46)            | 12 (24)                    | +                    | -            | -            | -      |      |
| EPEC8                | NSI              | 300214      | +           | +           | 15 (71)                | 11 (52)            | 11 (22)                    | +                    | -            | -            | -      |      |
| EPEC8                | NSI              | 402310      | +           | +           | 15 (71)                | 13 (50)            | 13 (27)                    | +                    | -            | -            | -      |      |
| EPEC8                | NSI              | 401817      | +           | +           | 15 (71)                | 13 (50)            | 13 (27)                    | +                    | -            | -            | -      |      |
| EPEC8                | NSI              | 401588      | +           | +           | 15 (71)                | 13 (50)            | 14 (29)                    | +                    | -            | -            | -      |      |
| EPEC8                | AI               | 102535      | +           | +           | 15 (71)                | 11 (52)            | 11 (22)                    | +                    | -            | -            | -      |      |
|                      |                  |             |             |             |                        |                    |                            | No. Genomes Positive | 10           | 0            | 0      | 0    |
|                      |                  |             |             |             |                        |                    |                            | Prevalence (%)       | 100          | 0            | 0      | 0    |
| EPEC9                | LI               | 302053      | +           | +           | 9 (43)                 | 5 (19)             | 10 (20)                    | +                    | -            | -            | +      |      |
| EPEC9                | LI               | 702324      | +           | +           | 14 (67)                | 10 (38)            | 9 (18)                     | +                    | -            | -            | -      |      |

|        |     |        |   |   |         |         |         |                      |       |       |       |       |
|--------|-----|--------|---|---|---------|---------|---------|----------------------|-------|-------|-------|-------|
| EPEC9  | NSI | 303145 | + | + | 10 (48) | 9 (35)  | 14 (29) | +                    | -     | -     | +     |       |
| EPEC9  | NSI | 300075 | + | + | 11 (52) | 7 (27)  | 12 (24) | +                    | -     | -     | +     |       |
| EPEC9  | AI  | 300847 | + | - | 0 (0)   | 1 (4)   | 4 (8)   | +                    | -     | -     | 1     |       |
| EPEC9  | AI  | 300469 | + | + | 14 (67) | 10 (38) | 9 (18)  | +                    | -     | -     | -     |       |
|        |     |        |   |   |         |         |         | No. Genomes Positive | 6     | 0     | 0     | 3     |
|        |     |        |   |   |         |         |         | Prevalence (%)       | 100   | 0     | 0     | 50    |
| EPEC10 | NSI | 100329 | + | - | 0 (0)   | 0 (0)   | 4 (8)   | -                    | +     | -     | -     |       |
| EPEC10 | NSI | 100854 | - | - | 12 (57) | 8 (31)  | 11 (22) | -                    | -     | -     | 2     |       |
|        |     |        |   |   |         |         |         | No. Genomes Positive | 0     | 1     | 0     | 0     |
|        |     |        |   |   |         |         |         | Prevalence (%)       | 0     | 50    | 0     | 0     |
| uAEEC  | LI  | 102550 | + | - | 9 (43)  | 13 (50) | 13 (27) | +                    | +     | +     | -     |       |
| uAEEC  | NSI | 102929 | - | - | 9 (43)  | 10 (38) | 19 (39) | +                    | +     | -     | -     |       |
| uAEEC  | NSI | 302909 | + | - | 9 (43)  | 6 (23)  | 11 (22) | +                    | -     | -     | -     |       |
| uAEEC  | AI  | 100175 | - | - | 9 (43)  | 6 (23)  | 7 (14)  | +                    | +     | -     | -     |       |
| uAEEC  | AI  | 102132 | - | - | 11 (52) | 11 (52) | 36 (73) | -                    | -     | -     | +     |       |
| uAEEC  | AI  | 103447 | + | + | 9 (43)  | 14 (54) | 15 (31) | +                    | +     | +     | -     |       |
| uAEEC  | AI  | 100100 | - | - | 13 (62) | 11 (52) | 37 (76) | -                    | -     | -     | +     |       |
| uAEEC  | AI  | 200077 | + | + | 13 (62) | 13 (50) | 10 (20) | +                    | -     | -     | -     |       |
| uAEEC  | AI  | 303301 | + | + | 13 (62) | 8 (31)  | 9 (18)  | +                    | -     | -     | -     |       |
| uAEEC  | AI  | 303139 | + | + | 9 (43)  | 14 (54) | 14 (29) | +                    | +     | +     | -     |       |
| uAEEC  | AI  | 302312 | + | + | 13 (62) | 8 (31)  | 9 (18)  | +                    | -     | -     | -     |       |
| uAEEC  | AI  | 402559 | + | - | 9 (43)  | 5 (19)  | 5 (10)  | +                    | -     | -     | -     |       |
| uAEEC  | AI  | 401675 | + | + | 10 (48) | 4 (15)  | 9 (18)  | +                    | -     | -     | 2     |       |
| uAEEC  | AI  | 700283 | + | + | 9 (43)  | 8 (31)  | 4 (8)   | +                    | -     | -     | -     |       |
|        |     |        |   |   |         |         |         | No. Genomes Positive | 12    | 5     | 3     | 2     |
|        |     |        |   |   |         |         |         | Prevalence (%)       | 85.71 | 35.71 | 21.43 | 14.29 |

<sup>a</sup>Clinical outcomes are classified as lethal (LI), non-lethal symptomatic (NSI), and asymptomatic (AI).

<sup>b</sup>The EPEC phylogenomic lineages are designated EPEC1-EPEC6, or NC indicates not classified to a lineage.

<sup>c</sup>A "+" indicates a gene or set of genes is present with a TBLASTN BSR value  $\geq 0.4$ . For the BFP operon, a "+" indicates that one or more genes of the BFP operon are present, "T" indicates an isolate that has a truncated bfp operon, and "-" indicates that no BFP genes were detected.



**Table S2.** Genes identified by LS-BSR that are significantly correlated with LI, NSI, or AI clinical outcomes for all 70 EPEC genomes analyzed using a stringent gene clustering threshold

| Cluster ID     | No. of Genomes                |     | Percentage of Genomes Containing Cluster |     |      |       | Chi-squared test |         | Fisher's exact test | Gene ID | Predicted Protein Function                                                           |
|----------------|-------------------------------|-----|------------------------------------------|-----|------|-------|------------------|---------|---------------------|---------|--------------------------------------------------------------------------------------|
|                | Present (≥0.9) <sup>a,b</sup> |     | Absent (<0.9) <sup>a,b</sup>             |     | % LI | % NSI | Greater %        | p-value | p-value             |         |                                                                                      |
|                | LI                            | NSI | LI                                       | NSI |      |       |                  |         |                     |         |                                                                                      |
| Cluster_105636 | 19                            | 11  | 5                                        | 12  | 79   | 48    | LI               | 3.73    | 0.0534              | 0.0355  | peptidase M60-like family protein                                                    |
| Cluster_113721 | 7                             | 15  | 17                                       | 8   | 29   | 65    | NSI              | 4.77    | 0.0290              | 0.0199  | phage tail tape measure protein, lambda family                                       |
| Cluster_121796 | 0                             | 4   | 24                                       | 19  | 0    | 17    | NSI              | 2.60    | 0.1067              | 0.0496  | caudovirales tail fibre assembly family protein                                      |
| Cluster_123564 | 1                             | 6   | 23                                       | 17  | 4    | 26    | NSI              | 2.89    | 0.0891              | 0.0479  | <i>fyuA</i><br>pesticin receptor                                                     |
| Cluster_123571 | 1                             | 6   | 23                                       | 17  | 4    | 26    | NSI              | 2.89    | 0.0891              | 0.0479  | ABC transporter family protein                                                       |
| Cluster_123776 | 0                             | 5   | 24                                       | 18  | 0    | 22    | NSI              | 3.78    | 0.0520              | 0.0219  | conserved hypothetical protein                                                       |
| Cluster_1322   | 1                             | 6   | 23                                       | 17  | 4    | 26    | NSI              | 2.89    | 0.0891              | 0.0479  | conserved hypothetical protein                                                       |
| Cluster_136944 | 17                            | 22  | 7                                        | 1   | 71   | 96    | NSI              | 3.52    | 0.0608              | 0.0479  | phage terminase large subunit family protein                                         |
| Cluster_137178 | 4                             | 11  | 20                                       | 12  | 17   | 48    | NSI              | 3.91    | 0.0479              | 0.0305  | hypothetical protein                                                                 |
| Cluster_140609 | 2                             | 8   | 22                                       | 15  | 8    | 35    | NSI              | 3.45    | 0.0631              | 0.0363  | conserved hypothetical protein                                                       |
| Cluster_14423  | 10                            | 3   | 14                                       | 20  | 42   | 13    | LI               | 3.48    | 0.0619              | 0.0490  | conserved hypothetical protein                                                       |
| Cluster_163350 | 2                             | 8   | 22                                       | 15  | 8    | 35    | NSI              | 3.45    | 0.0631              | 0.0363  | conserved hypothetical protein                                                       |
| Cluster_163539 | 0                             | 4   | 24                                       | 19  | 0    | 17    | NSI              | 2.60    | 0.1067              | 0.0496  | hypothetical protein                                                                 |
| Cluster_168638 | 9                             | 2   | 15                                       | 21  | 38   | 9     | LI               | 3.95    | 0.0469              | 0.0363  | putative tRNA transposase domain protein                                             |
| Cluster_175605 | 6                             | 0   | 18                                       | 23  | 25   | 0     | LI               | 4.54    | 0.0332              | 0.0219  | <i>rfbA</i><br>glucose-1-phosphate thymidyltransferase                               |
| Cluster_183262 | 23                            | 17  | 1                                        | 6   | 96   | 74    | LI               | 2.89    | 0.0891              | 0.0479  | hypothetical protein                                                                 |
| Cluster_184733 | 19                            | 23  | 5                                        | 0   | 79   | 100   | NSI              | 3.39    | 0.0654              | 0.0496  | <i>entS</i><br>enterobactin exporter EntS                                            |
| Cluster_188256 | 0                             | 4   | 24                                       | 19  | 0    | 17    | NSI              | 2.60    | 0.1067              | 0.0496  | conserved hypothetical protein                                                       |
| Cluster_196142 | 19                            | 11  | 5                                        | 12  | 79   | 48    | LI               | 3.73    | 0.0534              | 0.0355  | conserved hypothetical protein                                                       |
| Cluster_196644 | 17                            | 23  | 7                                        | 0   | 71   | 100   | NSI              | 5.75    | 0.0165              | 0.0094  | <i>hscA</i><br>fe-S protein assembly chaperone HscA                                  |
| Cluster_197373 | 19                            | 23  | 5                                        | 0   | 79   | 100   | NSI              | 3.39    | 0.0654              | 0.0496  | <i>emrB</i><br>multidrug resistance protein B                                        |
| Cluster_201731 | 10                            | 3   | 14                                       | 20  | 42   | 13    | LI               | 3.48    | 0.0619              | 0.0490  | helix-turn-helix, Pqs domain protein                                                 |
| Cluster_201738 | 10                            | 3   | 14                                       | 20  | 42   | 13    | LI               | 3.48    | 0.0619              | 0.0490  | conserved hypothetical protein                                                       |
| Cluster_208031 | 18                            | 23  | 6                                        | 0   | 75   | 100   | NSI              | 4.54    | 0.0332              | 0.0219  | substrate binding domain of ABC-type glycine betaine transport system family protein |
| Cluster_209143 | 0                             | 4   | 24                                       | 19  | 0    | 17    | NSI              | 2.60    | 0.1067              | 0.0496  | transposase C of IS166 homedomain protein                                            |
| Cluster_209349 | 19                            | 23  | 5                                        | 0   | 79   | 100   | NSI              | 3.39    | 0.0654              | 0.0496  | <i>tnaA</i><br>tryptophanase                                                         |
| Cluster_209403 | 19                            | 23  | 5                                        | 0   | 79   | 100   | NSI              | 3.39    | 0.0654              | 0.0496  | <i>selB</i><br>selenocysteine-specific translation elongation factor                 |
| Cluster_211547 | 19                            | 23  | 5                                        | 0   | 79   | 100   | NSI              | 3.39    | 0.0654              | 0.0496  | <i>dnaE</i><br>DNA polymerase III, alpha subunit                                     |
| Cluster_214112 | 1                             | 6   | 23                                       | 17  | 4    | 26    | NSI              | 2.89    | 0.0891              | 0.0479  | phage tail-collar fibre family protein                                               |
| Cluster_21586  | 19                            | 23  | 5                                        | 0   | 79   | 100   | NSI              | 3.39    | 0.0654              | 0.0496  | triphosphoribosyl-dephospho-CoA synthase CitG                                        |
| Cluster_21640  | 18                            | 23  | 6                                        | 0   | 75   | 100   | NSI              | 4.54    | 0.0332              | 0.0219  | <i>nagE</i><br>PTS system, N-acetylglucosamine-specific IIBC component               |
| Cluster_216712 | 1                             | 6   | 23                                       | 17  | 4    | 26    | NSI              | 2.89    | 0.0891              | 0.0479  | putative membrane protein                                                            |
| Cluster_217185 | 1                             | 6   | 23                                       | 17  | 4    | 26    | NSI              | 2.89    | 0.0891              | 0.0479  | <i>ybtU</i><br>yersiniabactin biosynthetic protein YbtU                              |
| Cluster_217186 | 1                             | 6   | 23                                       | 17  | 4    | 26    | NSI              | 2.89    | 0.0891              | 0.0479  | methyltransferase family protein                                                     |
| Cluster_217188 | 1                             | 6   | 23                                       | 17  | 4    | 26    | NSI              | 2.89    | 0.0891              | 0.0479  | helix-turn-helix domain protein                                                      |
| Cluster_217190 | 1                             | 6   | 23                                       | 17  | 4    | 26    | NSI              | 2.89    | 0.0891              | 0.0479  | ABC transporter family protein                                                       |
| Cluster_217191 | 1                             | 6   | 23                                       | 17  | 4    | 26    | NSI              | 2.89    | 0.0891              | 0.0479  | major Facilitator Superfamily protein                                                |
| Cluster_217459 | 0                             | 6   | 24                                       | 17  | 0    | 26    | NSI              | 5.03    | 0.0250              | 0.0094  | HTH domain protein                                                                   |
| Cluster_218768 | 19                            | 23  | 5                                        | 0   | 79   | 100   | NSI              | 3.39    | 0.0654              | 0.0496  | <i>dacB</i><br>D-alanyl-D-alanine carboxypeptidase/D-alanyl-D-alanine-endopeptidase  |
| Cluster_220923 | 19                            | 23  | 5                                        | 0   | 79   | 100   | NSI              | 3.39    | 0.0654              | 0.0496  | <i>nuoN</i><br>NADH-quinone oxidoreductase subunit N                                 |
| Cluster_22096  | 19                            | 23  | 5                                        | 0   | 79   | 100   | NSI              | 3.39    | 0.0654              | 0.0496  | AAA-like domain protein                                                              |
| Cluster_221350 | 19                            | 23  | 5                                        | 0   | 79   | 100   | NSI              | 3.39    | 0.0654              | 0.0496  | <i>ftsY</i><br>signal recognition particle-docking protein FtsY                      |
| Cluster_23468  | 18                            | 10  | 6                                        | 13  | 75   | 43    | LI               | 3.63    | 0.0569              | 0.0392  | phage capsid scaffolding (GPO) serine peptidase family protein                       |
| Cluster_236134 | 16                            | 8   | 8                                        | 15  | 67   | 35    | LI               | 3.59    | 0.0582              | 0.0422  | <i>dhfrI</i><br>dihydrofolate reductase type 1                                       |
| Cluster_236296 | 23                            | 17  | 1                                        | 6   | 96   | 74    | LI               | 2.89    | 0.0891              | 0.0479  | ATPase subunit of terminase family protein                                           |
| Cluster_237804 | 19                            | 23  | 5                                        | 0   | 79   | 100   | NSI              | 3.39    | 0.0654              | 0.0496  | nitrate reductase, alpha subunit                                                     |
| Cluster_240829 | 7                             | 1   | 17                                       | 22  | 29   | 4     | LI               | 3.52    | 0.0608              | 0.0479  | hypothetical protein                                                                 |
| Cluster_24314  | 5                             | 0   | 19                                       | 23  | 21   | 0     | LI               | 3.39    | 0.0654              | 0.0496  | degT/DnrJ/EryC1/StrS aminotransferase family protein                                 |
| Cluster_24348  | 5                             | 15  | 19                                       | 8   | 21   | 65    | NSI              | 7.74    | 0.0054              | 0.0032  | phage tail tape measure protein, lambda family                                       |
| Cluster_245108 | 18                            | 23  | 6                                        | 0   | 75   | 100   | NSI              | 4.54    | 0.0332              | 0.0219  | electron transport complex, RnfABCDGE type, B subunit                                |
| Cluster_245260 | 19                            | 23  | 5                                        | 0   | 79   | 100   | NSI              | 3.39    | 0.0654              | 0.0496  | <i>cheA</i><br>chemotaxis protein CheA                                               |
| Cluster_247403 | 5                             | 0   | 19                                       | 23  | 21   | 0     | LI               | 3.39    | 0.0654              | 0.0496  | glycosyl transferase 2 family protein                                                |
| Cluster_247837 | 6                             | 0   | 18                                       | 23  | 25   | 0     | LI               | 4.54    | 0.0332              | 0.0219  | putative domain protein                                                              |
| Cluster_254547 | 17                            | 9   | 7                                        | 14  | 71   | 39    | LI               | 3.58    | 0.0585              | 0.0415  | bacteriophage lysis family protein                                                   |
| Cluster_257914 | 24                            | 17  | 0                                        | 6   | 100  | 74    | LI               | 5.03    | 0.0250              | 0.0094  | <i>cadC</i><br>transcriptional activator CadC                                        |
| Cluster_258452 | 19                            | 23  | 5                                        | 0   | 79   | 100   | NSI              | 3.39    | 0.0654              | 0.0496  | <i>malP</i><br>maltodextrin phosphorylase                                            |
| Cluster_264521 | 19                            | 23  | 5                                        | 0   | 79   | 100   | NSI              | 3.39    | 0.0654              | 0.0496  | conserved hypothetical protein                                                       |
| Cluster_265225 | 18                            | 23  | 6                                        | 0   | 75   | 100   | NSI              | 4.54    | 0.0332              | 0.0219  | PRD domain protein                                                                   |
| Cluster_265334 | 19                            | 23  | 5                                        | 0   | 79   | 100   | NSI              | 3.39    | 0.0654              | 0.0496  | <i>mdfA</i><br>multidrug transporter MdfA                                            |
| Cluster_269540 | 19                            | 23  | 5                                        | 0   | 79   | 100   | NSI              | 3.39    | 0.0654              | 0.0496  | <i>can</i><br>carbonic anhydrase 2                                                   |
| Cluster_274418 | 4                             | 11  | 20                                       | 12  | 17   | 48    | NSI              | 3.91    | 0.0479              | 0.0305  | mu-like prophage FlUMu gp41 family protein                                           |
| Cluster_280171 | 18                            | 23  | 6                                        | 0   | 75   | 100   | NSI              | 4.54    | 0.0332              | 0.0219  | <i>tatD</i><br>tat-linked quality control protein TatD                               |
| Cluster_282502 | 18                            | 23  | 6                                        | 0   | 75   | 100   | NSI              | 4.54    | 0.0332              | 0.0219  | <i>yphB</i><br>aldose 1-epimerase                                                    |
| Cluster_283931 | 24                            | 19  | 0                                        | 4   | 100  | 83    | LI               | 2.60    | 0.1067              | 0.0496  | pyridine nucleotide-disulfide oxidoreductase family protein                          |
| Cluster_284866 | 7                             | 1   | 17                                       | 22  | 29   | 4     | LI               | 3.52    | 0.0608              | 0.0479  | bacterial regulatory, tetR family protein                                            |
| Cluster_286226 | 19                            | 23  | 5                                        | 0   | 79   | 100   | NSI              | 3.39    | 0.0654              | 0.0496  | <i>cybH</i><br>ni/Fe-hydrogenase, b-type cytochrome subunit                          |
| Cluster_286883 | 5                             | 0   | 19                                       | 23  | 21   | 0     | LI               | 3.39    | 0.0654              | 0.0496  | acetyltransferase domain protein                                                     |
| Cluster_290242 | 18                            | 23  | 6                                        | 0   | 75   | 100   | NSI              | 4.54    | 0.0332              | 0.0219  | <i>yphF</i><br>ABC transporter periplasmic-binding protein YphF                      |
| Cluster_290560 | 19                            | 23  | 5                                        | 0   | 79   | 100   | NSI              | 3.39    | 0.0654              | 0.0496  | AAA-like domain protein                                                              |
| Cluster_301785 | 4                             | 11  | 20                                       | 12  | 17   | 48    | NSI              | 3.91    | 0.0479              | 0.0305  | phage tail tape measure protein, TP901 family, core region                           |
| Cluster_306818 | 0                             | 4   | 24                                       | 19  | 0    | 17    | NSI              | 2.60    | 0.1067              | 0.0496  | conserved hypothetical protein                                                       |
| Cluster_307418 | 0                             | 4   | 24                                       | 19  | 0    | 17    | NSI              | 2.60    | 0.1067              | 0.0496  | conserved hypothetical protein                                                       |
| Cluster_307421 | 1                             | 6   | 23                                       | 17  | 4    | 26    | NSI              | 2.89    | 0.0891              | 0.0479  | alpha/beta hydrolase family protein                                                  |
| Cluster_307429 | 1                             | 6   | 23                                       | 17  | 4    | 26    | NSI              | 2.89    | 0.0891              | 0.0479  | salicylate synthase                                                                  |
| Cluster_307430 | 1                             | 6   | 23                                       | 17  | 4    | 26    | NSI              | 2.89    | 0.0891              | 0.0479  | phage integrase family protein                                                       |
| Cluster_313761 | 9                             | 2   | 15                                       | 21  | 38   | 9     | LI               | 3.95    | 0.0469              | 0.0363  | HNH endonuclease family protein                                                      |
| Cluster_315743 | 19                            | 23  | 5                                        | 0   | 79   | 100   | NSI              | 3.39    | 0.0654              | 0.0496  | <i>ycdY</i><br>chaperone protein YcdY                                                |
| Cluster_315801 | 2                             | 10  | 22                                       | 13  | 8    | 43    | NSI              | 5.89    | 0.0152              | 0.0078  | phage tail protein I                                                                 |
| Cluster_317131 | 1                             | 6   | 23                                       | 17  | 4    | 26    | NSI              | 2.89    | 0.0891              | 0.0479  | conserved hypothetical protein                                                       |
| Cluster_32291  | 18                            | 23  | 6                                        | 0   | 75   | 100   | NSI              | 4.54    | 0.0332              | 0.0219  | <i>dcd</i><br>deoxycytidine triphosphate deaminase                                   |
| Cluster_324641 | 18                            | 23  | 6                                        | 0   | 75   | 100   | NSI              | 4.54    | 0.0332              | 0.0219  | <i>yphB</i><br>aldose 1-epimerase                                                    |
| Cluster_328365 | 21                            | 13  | 3                                        | 10  | 88   | 57    | LI               | 4.19    | 0.0406              | 0.0243  | hypothetical protein                                                                 |
| Cluster_335585 | 19                            | 23  | 5                                        | 0   | 79   | 100   | NSI              | 3.39    | 0.0654              | 0.0496  | ybgS-like family protein                                                             |
| Cluster_342879 | 5                             | 12  | 19                                       | 11  | 21   | 52    | NSI              | 3.73    | 0.0534              | 0.0355  | conserved hypothetical protein                                                       |
| Cluster_346133 | 24                            | 19  | 0                                        | 4   | 100  | 83    | LI               | 2.60    | 0.1067              | 0.0496  | conserved hypothetical protein                                                       |
| Cluster_346478 | 21                            | 14  | 3                                        | 9   | 88   | 61    | LI               | 3.09    | 0.0787              | 0.0490  | conserved hypothetical protein                                                       |
| Cluster_346896 | 2                             | 8   | 22                                       | 15  | 8    | 35    | NSI              | 3.45    | 0.0631              | 0.0363  | phage tail tape measure protein, lambda family                                       |
| Cluster_36312  | 2                             | 8   | 22                                       | 15  | 8    | 35    | NSI              | 3.45    | 0.0631              | 0.0363  | ethanolamine utilization - propanediol utilization family protein                    |
| Cluster_4538   | 0                             | 4   | 24                                       | 19  | 0    | 17    | NSI              | 2.60    | 0.1067              | 0.0496  | putative membrane protein                                                            |
| Cluster_46213  | 3                             | 10  | 21                                       | 13  | 13   | 43    | NSI              | 4.19    | 0.0406              | 0.0243  | putative transmembrane protein                                                       |
| Cluster_48362  | 1                             | 6   | 23                                       | 17  | 4    | 26    | NSI              | 2.89    | 0.0891              | 0.0479  | amino acid adenylation domain protein                                                |
| Cluster_48588  | 1                             | 6   | 23                                       | 17  | 4    | 26    | NSI              | 2.89    | 0.0891              | 0.0479  | phosphoadenosine phosphosulfate reductase family protein                             |
| Cluster_51806  | 19                            | 23  | 5                                        | 0   | 79   | 100   | NSI              | 3.39    | 0.0654              | 0.0496  | <i>ptsP</i><br>phosphoenolpyruvate-phosphotransferase                                |



| Cluster       | LI | AI | LI | AI | LI  | AI  | NSI | LI   | AI     | LI     | AI | LI | AI | LI | AI | LI | AI | LI | AI          | Gene ID                    | Protein Function                                         |
|---------------|----|----|----|----|-----|-----|-----|------|--------|--------|----|----|----|----|----|----|----|----|-------------|----------------------------|----------------------------------------------------------|
| Cluster_5286  | 19 | 23 | 5  | 0  | 79  | 100 | NSI | 3.39 | 0.0654 | 0.0496 |    |    |    |    |    |    |    |    | <i>atpF</i> | ATP synthase F0, B subunit |                                                          |
| Cluster_59364 | 10 | 3  | 14 | 20 | 42  | 13  | LI  | 3.48 | 0.0619 | 0.0490 |    |    |    |    |    |    |    |    |             |                            | endodeoxyribonuclease RusA family protein                |
| Cluster_59365 | 10 | 3  | 14 | 20 | 42  | 13  | LI  | 3.48 | 0.0619 | 0.0490 |    |    |    |    |    |    |    |    |             |                            | phage antitermination Q family protein                   |
| Cluster_60356 | 24 | 19 | 0  | 4  | 100 | 83  | LI  | 2.60 | 0.1067 | 0.0496 |    |    |    |    |    |    |    |    |             |                            | helix-turn-helix domain protein                          |
| Cluster_64413 | 0  | 5  | 24 | 18 | 0   | 22  | NSI | 3.78 | 0.0520 | 0.0219 |    |    |    |    |    |    |    |    |             |                            | phosphoadenosine phosphosulfate reductase family protein |
| Cluster_8046  | 0  | 4  | 24 | 19 | 0   | 17  | NSI | 2.60 | 0.1067 | 0.0496 |    |    |    |    |    |    |    |    |             |                            | hypothetical protein                                     |
| Cluster_80721 | 24 | 19 | 0  | 4  | 100 | 83  | LI  | 2.60 | 0.1067 | 0.0496 |    |    |    |    |    |    |    |    |             |                            | putative lipopolysaccharide heptosyltransferase III      |
| Cluster_81331 | 18 | 23 | 6  | 0  | 75  | 100 | NSI | 4.54 | 0.0332 | 0.0219 |    |    |    |    |    |    |    |    |             |                            | IppC lipofamily protein                                  |
| Cluster_82579 | 14 | 6  | 10 | 17 | 58  | 26  | LI  | 3.76 | 0.0524 | 0.0392 |    |    |    |    |    |    |    |    |             |                            | putative non-LEE-encoded effector EspJ                   |
| Cluster_83084 | 19 | 23 | 5  | 0  | 79  | 100 | NSI | 3.39 | 0.0654 | 0.0496 |    |    |    |    |    |    |    |    |             |                            | phosphoribosylamine-glycine ligase                       |
| Cluster_83927 | 6  | 0  | 18 | 23 | 25  | 0   | LI  | 4.54 | 0.0332 | 0.0219 |    |    |    |    |    |    |    |    |             |                            | dTDP-6-deoxy-3,4-keto-hexulose isomerase                 |
| Cluster_83929 | 6  | 0  | 18 | 23 | 25  | 0   | LI  | 4.54 | 0.0332 | 0.0219 |    |    |    |    |    |    |    |    |             |                            | dTDP-glucose 4,6-dehydratase                             |
| Cluster_84374 | 19 | 23 | 5  | 0  | 79  | 100 | NSI | 3.39 | 0.0654 | 0.0496 |    |    |    |    |    |    |    |    |             |                            | transglycosylase SLT domain protein                      |
| Cluster_87728 | 19 | 23 | 5  | 0  | 79  | 100 | NSI | 3.39 | 0.0654 | 0.0496 |    |    |    |    |    |    |    |    |             |                            | deoxyribodipyrimidine photo-lyase                        |
| Cluster_92542 | 0  | 4  | 24 | 19 | 0   | 17  | NSI | 2.60 | 0.1067 | 0.0496 |    |    |    |    |    |    |    |    |             |                            | <i>phrB</i>                                              |
| Cluster_93726 | 19 | 23 | 5  | 0  | 79  | 100 | NSI | 3.39 | 0.0654 | 0.0496 |    |    |    |    |    |    |    |    |             |                            | <i>espS</i>                                              |
| Cluster_97263 | 19 | 23 | 5  | 0  | 79  | 100 | NSI | 3.39 | 0.0654 | 0.0496 |    |    |    |    |    |    |    |    |             |                            | putative t3SS effector protein EspS                      |
| Cluster_97497 | 19 | 23 | 5  | 0  | 79  | 100 | NSI | 3.39 | 0.0654 | 0.0496 |    |    |    |    |    |    |    |    |             |                            | <i>tolA</i>                                              |
|               |    |    |    |    |     |     |     |      |        |        |    |    |    |    |    |    |    |    |             |                            | protein TolA                                             |
|               |    |    |    |    |     |     |     |      |        |        |    |    |    |    |    |    |    |    |             |                            | <i>cadA</i>                                              |
|               |    |    |    |    |     |     |     |      |        |        |    |    |    |    |    |    |    |    |             |                            | cadmium-translocating P-type ATPase                      |
|               |    |    |    |    |     |     |     |      |        |        |    |    |    |    |    |    |    |    |             |                            | protein TolA                                             |

| Lethal (LI) vs. Asymptomatic (AI) |                               |                |                              |    |           |      |                                          |           |         |                  |             |                            |                                                                           |    |
|-----------------------------------|-------------------------------|----------------|------------------------------|----|-----------|------|------------------------------------------|-----------|---------|------------------|-------------|----------------------------|---------------------------------------------------------------------------|----|
|                                   |                               | No. of Genomes |                              |    |           |      | Percentage of Genomes Containing Cluster |           |         | Chi-squared test |             | Fisher's exact test        |                                                                           |    |
| Cluster ID                        | Present (≥0.9) <sup>a,b</sup> |                | Absent (<0.9) <sup>a,b</sup> |    | Greater % | % LI | % AI                                     | Statistic | p-value | p-value          | Gene ID     | Predicted Protein Function |                                                                           |    |
|                                   | LI                            | AI             | LI                           | AI |           |      |                                          |           |         |                  |             | LI                         | AI                                                                        | LI |
| Cluster_102911                    | 2                             | 8              | 22                           | 15 | 8         | 35   | AI                                       | 3.45      | 0.0631  | 0.0363           |             |                            | phage integrase family protein                                            |    |
| Cluster_103347                    | 12                            | 4              | 12                           | 19 | 50        | 17   | LI                                       | 4.20      | 0.0403  | 0.0305           |             |                            | conserved hypothetical protein                                            |    |
| Cluster_103412                    | 7                             | 1              | 17                           | 22 | 29        | 4    | LI                                       | 3.52      | 0.0608  | 0.0479           |             |                            | repressor protein C2                                                      |    |
| Cluster_103416                    | 13                            | 5              | 11                           | 18 | 54        | 22   | LI                                       | 3.94      | 0.0470  | 0.0355           |             |                            | conserved hypothetical protein                                            |    |
| Cluster_103685                    | 24                            | 16             | 0                            | 7  | 100       | 70   | LI                                       | 6.35      | 0.0117  | 0.0039           |             |                            | hypothetical protein                                                      |    |
| Cluster_10467                     | 17                            | 9              | 7                            | 14 | 71        | 39   | LI                                       | 3.58      | 0.0585  | 0.0415           |             |                            | phage Terminase family protein                                            |    |
| Cluster_105805                    | 23                            | 16             | 1                            | 7  | 96        | 70   | LI                                       | 4.03      | 0.0447  | 0.0226           |             |                            | DNA methylase family protein                                              |    |
| Cluster_107544                    | 5                             | 0              | 19                           | 23 | 21        | 0    | LI                                       | 3.39      | 0.0654  | 0.0496           |             |                            | tape measure domain protein                                               |    |
| Cluster_107631                    | 18                            | 10             | 6                            | 13 | 75        | 43   | LI                                       | 3.63      | 0.0569  | 0.0392           |             |                            | phage tail tape measure protein, TP901 family, core region                |    |
| Cluster_108011                    | 13                            | 3              | 11                           | 20 | 54        | 13   | LI                                       | 7.11      | 0.0077  | 0.0050           | <i>traN</i> |                            | type-F conjugative transfer system mating-pair stabilization protein TraN |    |
| Cluster_108598                    | 14                            | 5              | 10                           | 18 | 58        | 22   | LI                                       | 5.10      | 0.0239  | 0.0171           |             |                            | DNA-packaging protein FI                                                  |    |
| Cluster_108599                    | 22                            | 14             | 2                            | 9  | 92        | 61   | LI                                       | 4.61      | 0.0317  | 0.0173           |             |                            | tail attachment protein                                                   |    |
| Cluster_108649                    | 5                             | 0              | 19                           | 23 | 21        | 0    | LI                                       | 3.39      | 0.0654  | 0.0496           |             |                            | conserved hypothetical protein                                            |    |
| Cluster_108651                    | 5                             | 0              | 19                           | 23 | 21        | 0    | LI                                       | 3.39      | 0.0654  | 0.0496           |             |                            | conserved hypothetical protein                                            |    |
| Cluster_108754                    | 17                            | 9              | 7                            | 14 | 71        | 39   | LI                                       | 3.58      | 0.0585  | 0.0415           |             |                            | phage terminase, small subunit, P27 family                                |    |
| Cluster_109753                    | 9                             | 16             | 15                           | 7  | 38        | 70   | AI                                       | 3.65      | 0.0561  | 0.0415           |             |                            | outer membrane transport family protein                                   |    |
| Cluster_11079                     | 11                            | 20             | 13                           | 3  | 46        | 87   | AI                                       | 7.11      | 0.0077  | 0.0050           |             |                            | transglycosylase SLT domain protein                                       |    |
| Cluster_113457                    | 14                            | 20             | 10                           | 3  | 58        | 87   | AI                                       | 3.48      | 0.0619  | 0.0499           | <i>fimF</i> |                            | protein FimF                                                              |    |
| Cluster_113721                    | 7                             | 15             | 17                           | 8  | 29        | 65   | AI                                       | 4.77      | 0.0290  | 0.0190           |             |                            | phage tail tape measure protein, lambda family                            |    |
| Cluster_114691                    | 5                             | 0              | 19                           | 23 | 21        | 0    | LI                                       | 3.39      | 0.0654  | 0.0496           |             |                            | conserved hypothetical protein                                            |    |
| Cluster_115306                    | 7                             | 1              | 17                           | 22 | 29        | 4    | LI                                       | 3.52      | 0.0608  | 0.0479           |             |                            | putative membrane protein                                                 |    |
| Cluster_117195                    | 24                            | 19             | 0                            | 4  | 100       | 83   | LI                                       | 2.60      | 0.1067  | 0.0496           |             |                            | conserved hypothetical protein                                            |    |
| Cluster_118792                    | 23                            | 17             | 1                            | 6  | 96        | 74   | LI                                       | 2.89      | 0.0891  | 0.0479           |             |                            | methyltransferase domain protein                                          |    |
| Cluster_118881                    | 23                            | 16             | 1                            | 7  | 96        | 70   | LI                                       | 4.03      | 0.0447  | 0.0226           |             |                            | transposase, Mutator family protein                                       |    |
| Cluster_118990                    | 8                             | 1              | 16                           | 22 | 33        | 4    | LI                                       | 4.64      | 0.0313  | 0.0226           |             |                            | conserved hypothetical protein                                            |    |
| Cluster_119046                    | 5                             | 0              | 19                           | 23 | 21        | 0    | LI                                       | 3.39      | 0.0654  | 0.0496           |             |                            | putative tail fiber protein                                               |    |
| Cluster_12327                     | 4                             | 13             | 20                           | 10 | 17        | 57   | AI                                       | 6.45      | 0.0111  | 0.0065           |             |                            | putative prophage protein                                                 |    |
| Cluster_125122                    | 7                             | 0              | 17                           | 23 | 29        | 0    | LI                                       | 5.75      | 0.0165  | 0.0094           |             |                            | putative predicted protein                                                |    |
| Cluster_127340                    | 16                            | 8              | 8                            | 15 | 67        | 35   | LI                                       | 3.59      | 0.0582  | 0.0422           |             |                            | DDE_Tnp_1-associated family protein                                       |    |
| Cluster_127445                    | 5                             | 0              | 19                           | 23 | 21        | 0    | LI                                       | 3.39      | 0.0654  | 0.0496           |             |                            | conserved hypothetical protein                                            |    |
| Cluster_127817                    | 23                            | 17             | 1                            | 6  | 96        | 74   | LI                                       | 2.89      | 0.0891  | 0.0479           | <i>repA</i> |                            | incFII family plasmid replication initiator RepA                          |    |
| Cluster_128383                    | 8                             | 1              | 16                           | 22 | 33        | 4    | LI                                       | 4.64      | 0.0313  | 0.0226           |             |                            | conserved hypothetical protein                                            |    |
| Cluster_128567                    | 22                            | 13             | 2                            | 10 | 92        | 57   | LI                                       | 5.89      | 0.0152  | 0.0078           |             |                            | phage portal protein, lambda family                                       |    |
| Cluster_131841                    | 18                            | 23             | 6                            | 0  | 75        | 100  | AI                                       | 4.54      | 0.0332  | 0.0219           | <i>fryC</i> |                            | fructose-like permease IIC component 1                                    |    |
| Cluster_133256                    | 0                             | 4              | 24                           | 19 | 0         | 17   | AI                                       | 2.60      | 0.1067  | 0.0496           |             |                            | conserved hypothetical protein                                            |    |
| Cluster_133289                    | 23                            | 17             | 1                            | 6  | 96        | 74   | LI                                       | 2.89      | 0.0891  | 0.0479           |             |                            | bacterial Ig-like domain family protein                                   |    |
| Cluster_1339                      | 5                             | 12             | 19                           | 11 | 21        | 52   | AI                                       | 3.73      | 0.0534  | 0.0355           |             |                            | bacteriophage replication gene A family protein                           |    |
| Cluster_135012                    | 23                            | 15             | 1                            | 8  | 96        | 65   | LI                                       | 5.27      | 0.0217  | 0.0102           |             |                            | gene 25-like lysozyme family protein                                      |    |
| Cluster_136953                    | 21                            | 13             | 3                            | 10 | 88        | 57   | LI                                       | 4.19      | 0.0406  | 0.0243           |             |                            | haemolysin expression modulating family protein                           |    |
| Cluster_13773                     | 20                            | 12             | 4                            | 11 | 83        | 52   | LI                                       | 3.91      | 0.0479  | 0.0305           | <i>tolP</i> |                            | dihydropterate synthase                                                   |    |
| Cluster_138051                    | 17                            | 7              | 7                            | 16 | 71        | 30   | LI                                       | 6.14      | 0.0132  | 0.0087           |             |                            | lysis S family protein                                                    |    |
| Cluster_14417                     | 9                             | 1              | 15                           | 22 | 38        | 4    | LI                                       | 5.85      | 0.0155  | 0.0102           |             |                            | putative predicted protein                                                |    |
| Cluster_14423                     | 10                            | 2              | 14                           | 21 | 42        | 9    | LI                                       | 5.09      | 0.0240  | 0.0173           |             |                            | conserved hypothetical protein                                            |    |
| Cluster_14537                     | 8                             | 1              | 16                           | 22 | 33        | 4    | LI                                       | 4.64      | 0.0313  | 0.0226           |             |                            | viral (Super1) RNA helicase family protein                                |    |
| Cluster_145816                    | 4                             | 12             | 20                           | 11 | 17        | 52   | AI                                       | 5.11      | 0.0238  | 0.0145           |             |                            | putative glyco3, capsid size determination protein Sid                    |    |
| Cluster_147543                    | 8                             | 0              | 16                           | 23 | 33        | 0    | LI                                       | 7.03      | 0.0080  | 0.0039           |             |                            | putative yfdA                                                             |    |
| Cluster_147672                    | 22                            | 15             | 2                            | 8  | 92        | 65   | LI                                       | 3.45      | 0.0631  | 0.0363           |             |                            | terminase small subunit                                                   |    |
| Cluster_14998                     | 17                            | 5              | 7                            | 18 | 71        | 22   | LI                                       | 9.48      | 0.0021  | 0.0012           |             |                            | bacteriophage replication gene A family protein                           |    |
| Cluster_15006                     | 23                            | 15             | 1                            | 8  | 96        | 65   | LI                                       | 5.27      | 0.0217  | 0.0102           |             |                            | phage major capsid protein, P2 family                                     |    |
| Cluster_150583                    | 24                            | 19             | 0                            | 4  | 100       | 83   | LI                                       | 2.60      | 0.1067  | 0.0496           |             |                            | transposase family protein                                                |    |
| Cluster_151647                    | 22                            | 14             | 2                            | 9  | 92        | 61   | LI                                       | 4.61      | 0.0317  | 0.0173           |             |                            | phage major capsid E family protein                                       |    |
| Cluster_152085                    | 6                             | 0              | 18                           | 23 | 25        | 0    | LI                                       | 4.54      | 0.0332  | 0.0219           |             |                            | conserved hypothetical protein                                            |    |
| Cluster_153041                    | 16                            | 8              | 8                            | 15 | 67        | 35   | LI                                       | 3.59      | 0.0582  | 0.0422           |             |                            | conserved hypothetical protein                                            |    |
| Cluster_153994                    | 23                            | 15             | 1                            | 8  | 96        | 65   | LI                                       | 5.27      | 0.0217  | 0.0102           |             |                            | conserved hypothetical protein                                            |    |
| Cluster_155688                    | 0                             | 4              | 24                           | 19 | 0         | 17   | AI                                       | 2.60      | 0.1067  | 0.0496           | <i>yjeO</i> |                            | inner membrane protein YjeO                                               |    |
| Cluster_155747                    | 19                            | 23             | 5                            | 0  | 79        | 100  | AI                                       | 3.39      | 0.0654  | 0.0496           | <i>phnH</i> |                            | phosphonate C-P lyase system protein PhnH                                 |    |
| Cluster_157040                    | 18                            | 9              | 6                            | 14 | 75        | 39   | LI                                       | 4.80      | 0.0284  | 0.0189           |             |                            | methyltransferase domain protein                                          |    |
| Cluster_16353                     | 2                             | 8              | 22                           | 15 | 8         | 35   | AI                                       | 3.45      | 0.0631  | 0.0363           |             |                            | conserved hypothetical protein                                            |    |
| Cluster_163907                    | 5                             | 0              | 19                           | 23 | 21        | 0    | LI                                       | 3.39      | 0.0654  | 0.0496           |             |                            | glycosyltransferase Family 4 family protein                               |    |
| Cluster_163983                    | 5                             | 0              | 19                           | 23 | 21        | 0    | LI                                       | 3.39      | 0.0654  | 0.0496           |             |                            | conserved hypothetical protein                                            |    |
| Cluster_164950                    | 5                             | 0              | 19                           | 23 | 21        | 0    | LI                                       | 3.39      | 0.0654  | 0.0496           |             |                            | UTRA domain protein                                                       |    |
| Cluster_166190                    | 7                             | 0              | 17                           | 23 | 29        | 0    | LI                                       | 5.75      | 0.0165  | 0.0094           |             |                            | phage integrase family protein                                            |    |
| Cluster_166870                    | 19                            | 10             | 5                            | 13 | 79        | 43   | LI                                       | 4.91      | 0.0267  | 0.0171           |             |                            | integron integrase family protein                                         |    |
| Cluster_168917                    | 0                             | 4              | 24                           | 19 | 0         | 17   | AI                                       | 2.60      | 0.1067  | 0.0496           |             |                            | nucleoside 2-deoxyribosyltransferase family protein                       |    |
| Cluster_169965                    | 4                             | 13             | 20                           | 10 | 17        | 57   | AI                                       | 6.45      | 0.0111  | 0.0065           |             |                            | ogr/Delta-like zinc finger family protein                                 |    |
| Cluster_171515                    | 0                             | 4              | 24                           | 19 | 0         | 17   | AI                                       | 2.60      | 0.1067  | 0.0496           |             |                            | putative lipoprotein                                                      |    |
| Cluster_171516                    | 0                             | 4              | 24                           | 19 | 0         | 17   | AI                                       | 2.60      | 0.1067  | 0.0496           |             |                            | methyltransferase domain protein                                          |    |
| Cluster_171517                    | 0                             | 4              | 24                           | 19 | 0         | 17   | AI                                       | 2.60      | 0.1067  | 0.0496           |             |                            | beta-ketoacyl synthase, N-terminal domain protein                         |    |
| Cluster_171518                    | 0                             | 4              | 24                           | 19 | 0         | 17   | AI                                       | 2.60      | 0.1067  | 0.0496           |             |                            | acyltransferase family protein                                            |    |
| Cluster_171521                    | 0                             | 4              | 24                           | 19 | 0         | 17   | AI                                       | 2.60      | 0.1067  | 0.0496           |             |                            | putative membrane protein                                                 |    |
| Cluster_171522                    | 0                             | 4              | 24                           | 19 | 0         | 17   | AI                                       | 2.60      | 0.1067  | 0.0496           |             |                            | AMP-binding enzyme family protein                                         |    |
| Cluster_171524                    | 0                             | 4              | 24                           | 19 | 0         | 17   | AI                                       | 2.60      | 0.1067  | 0.0496           |             |                            | glycosyl transferase 2 family protein                                     |    |
| Cluster_171525                    | 0                             | 4              | 24                           | 19 | 0         | 17   | AI                                       | 2.60      | 0.1067  | 0.0496           |             |                            | thioesterase-like superfamily protein                                     |    |
| Cluster_171526                    | 0                             | 4              | 24                           | 19 | 0         | 17   | AI                                       | 2.60      | 0.1067  | 0.0496           |             |                            | outer membrane lipocarrier LoA family protein                             |    |
| Cluster_171527                    | 0                             | 4              | 24                           | 19 | 0         | 17   | AI                                       | 2.60      | 0.1067  | 0.0496           |             |                            | MMPL family protein                                                       |    |

|                |    |    |    |    |     |     |    |      |        |        |              |                                                                       |
|----------------|----|----|----|----|-----|-----|----|------|--------|--------|--------------|-----------------------------------------------------------------------|
| Cluster_171529 | 0  | 4  | 24 | 19 | 0   | 17  | AI | 2.60 | 0.1067 | 0.0496 |              | beta-ketoacyl synthase, N-terminal domain protein                     |
| Cluster_172243 | 0  | 4  | 24 | 19 | 0   | 17  | AI | 2.60 | 0.1067 | 0.0496 |              | phage integrase family protein                                        |
| Cluster_175599 | 5  | 0  | 19 | 23 | 21  | 0   | LI | 3.39 | 0.0654 | 0.0496 | <i>rfbD</i>  | dTDP-4-dehydrorhamnose reductase                                      |
| Cluster_175605 | 6  | 0  | 18 | 23 | 25  | 0   | LI | 4.54 | 0.0332 | 0.0219 | <i>rfbA</i>  | glucose-1-phosphate thymidyltransferase                               |
| Cluster_175612 | 6  | 0  | 18 | 23 | 25  | 0   | LI | 4.54 | 0.0332 | 0.0219 |              | transposase DDE domain protein                                        |
| Cluster_175618 | 6  | 0  | 18 | 23 | 25  | 0   | LI | 4.54 | 0.0332 | 0.0219 |              | polysaccharide biosynthesis/export family protein                     |
| Cluster_177488 | 6  | 0  | 18 | 23 | 25  | 0   | LI | 4.54 | 0.0332 | 0.0219 | <i>flhC</i>  | flagellin                                                             |
| Cluster_178274 | 23 | 17 | 1  | 6  | 96  | 74  | LI | 2.89 | 0.0891 | 0.0479 |              | conserved hypothetical protein                                        |
| Cluster_178309 | 10 | 3  | 14 | 20 | 42  | 13  | LI | 3.48 | 0.0619 | 0.0490 |              | conserved hypothetical protein                                        |
| Cluster_181608 | 20 | 12 | 4  | 11 | 83  | 52  | LI | 3.91 | 0.0479 | 0.0305 |              | transposase family protein                                            |
| Cluster_183172 | 6  | 0  | 18 | 23 | 25  | 0   | LI | 4.54 | 0.0332 | 0.0219 |              | DDE domain protein                                                    |
| Cluster_183173 | 6  | 0  | 18 | 23 | 25  | 0   | LI | 4.54 | 0.0332 | 0.0219 |              | transposase family protein                                            |
| Cluster_183184 | 16 | 8  | 8  | 15 | 67  | 35  | LI | 3.59 | 0.0582 | 0.0422 |              | phage minor tail protein G                                            |
| Cluster_183211 | 23 | 16 | 1  | 7  | 96  | 70  | LI | 4.03 | 0.0447 | 0.0226 |              | DNA methylase family protein                                          |
| Cluster_183988 | 5  | 0  | 19 | 23 | 21  | 0   | LI | 3.39 | 0.0654 | 0.0496 |              | putative transposase                                                  |
| Cluster_185869 | 1  | 7  | 23 | 16 | 4   | 30  | AI | 4.03 | 0.0447 | 0.0226 |              | transposase family protein                                            |
| Cluster_188245 | 18 | 8  | 6  | 15 | 75  | 35  | LI | 6.14 | 0.0132 | 0.0084 |              | conserved hypothetical protein                                        |
| Cluster_188256 | 0  | 4  | 24 | 19 | 0   | 17  | AI | 2.60 | 0.1067 | 0.0496 |              | conserved hypothetical protein                                        |
| Cluster_188375 | 18 | 10 | 6  | 13 | 75  | 43  | LI | 3.63 | 0.0569 | 0.0392 |              | phage major capsid E family protein                                   |
| Cluster_193190 | 24 | 19 | 0  | 4  | 100 | 83  | LI | 2.60 | 0.1067 | 0.0496 |              | nlpC/P60 family protein                                               |
| Cluster_195799 | 1  | 6  | 23 | 17 | 4   | 26  | AI | 2.89 | 0.0891 | 0.0479 |              | putative icd-like protein                                             |
| Cluster_196644 | 17 | 23 | 7  | 0  | 71  | 100 | AI | 5.75 | 0.0165 | 0.0094 | <i>hscA</i>  | fe-S protein assembly chaperone HscA                                  |
| Cluster_200453 | 4  | 13 | 20 | 10 | 17  | 57  | AI | 6.45 | 0.0111 | 0.0065 |              | putative derepression protein                                         |
| Cluster_20103  | 15 | 6  | 9  | 17 | 63  | 26  | LI | 4.91 | 0.0267 | 0.0189 |              | outer membrane transport family protein                               |
| Cluster_201168 | 18 | 23 | 6  | 0  | 75  | 100 | AI | 4.54 | 0.0332 | 0.0219 | <i>eutK</i>  | ethanolamine utilization protein EutK                                 |
| Cluster_201403 | 9  | 1  | 15 | 22 | 38  | 4   | LI | 5.85 | 0.0155 | 0.0102 |              | conserved hypothetical protein                                        |
| Cluster_201731 | 10 | 1  | 14 | 22 | 42  | 4   | LI | 7.16 | 0.0074 | 0.0044 |              | helix-turn-helix, Psq domain protein                                  |
| Cluster_201738 | 10 | 1  | 14 | 22 | 42  | 4   | LI | 7.16 | 0.0074 | 0.0044 |              | conserved hypothetical protein                                        |
| Cluster_202509 | 14 | 5  | 10 | 18 | 58  | 22  | LI | 5.10 | 0.0239 | 0.0171 |              | transposase C of IS166 homeodomain protein                            |
| Cluster_206025 | 0  | 4  | 24 | 19 | 0   | 17  | AI | 2.60 | 0.1067 | 0.0496 |              | phosphopantetheine attachment site family protein                     |
| Cluster_206026 | 0  | 4  | 24 | 19 | 0   | 17  | AI | 2.60 | 0.1067 | 0.0496 |              | phosphopantetheine attachment site family protein                     |
| Cluster_206029 | 0  | 4  | 24 | 19 | 0   | 17  | AI | 2.60 | 0.1067 | 0.0496 |              | conserved hypothetical protein                                        |
| Cluster_206034 | 0  | 4  | 24 | 19 | 0   | 17  | AI | 2.60 | 0.1067 | 0.0496 |              | conserved hypothetical protein                                        |
| Cluster_206036 | 0  | 4  | 24 | 19 | 0   | 17  | AI | 2.60 | 0.1067 | 0.0496 |              | fabA-like domain protein                                              |
| Cluster_206037 | 0  | 4  | 24 | 19 | 0   | 17  | AI | 2.60 | 0.1067 | 0.0496 |              | KR domain protein                                                     |
| Cluster_206038 | 0  | 4  | 24 | 19 | 0   | 17  | AI | 2.60 | 0.1067 | 0.0496 |              | beta-ketoacyl synthase, N-terminal domain protein                     |
| Cluster_206099 | 0  | 4  | 24 | 19 | 0   | 17  | AI | 2.60 | 0.1067 | 0.0496 |              | conserved hypothetical protein                                        |
| Cluster_207740 | 0  | 4  | 24 | 19 | 0   | 17  | AI | 2.60 | 0.1067 | 0.0496 |              | caudovirales tail fibre assembly family protein                       |
| Cluster_208660 | 18 | 23 | 6  | 0  | 75  | 100 | AI | 4.54 | 0.0332 | 0.0219 | <i>dnaX</i>  | DNA polymerase III, subunit gamma and tau                             |
| Cluster_209349 | 19 | 23 | 5  | 0  | 79  | 100 | AI | 3.39 | 0.0654 | 0.0496 | <i>tnaA</i>  | tryptophanase                                                         |
| Cluster_209403 | 19 | 23 | 5  | 0  | 79  | 100 | AI | 3.39 | 0.0654 | 0.0496 | <i>selB</i>  | selenocysteine-specific translation elongation factor                 |
| Cluster_210145 | 0  | 5  | 24 | 18 | 0   | 22  | AI | 3.78 | 0.0520 | 0.0219 |              | conserved hypothetical protein                                        |
| Cluster_210210 | 0  | 5  | 24 | 18 | 0   | 22  | AI | 3.78 | 0.0520 | 0.0219 | <i>hpaC</i>  | 4-hydroxyphenylacetate 3-monooxygenase, reductase component           |
| Cluster_210211 | 0  | 5  | 24 | 18 | 0   | 22  | AI | 3.78 | 0.0520 | 0.0219 | <i>hpaB</i>  | 4-hydroxyphenylacetate 3-monooxygenase, oxygenase component           |
| Cluster_210215 | 0  | 5  | 24 | 18 | 0   | 22  | AI | 3.78 | 0.0520 | 0.0219 | <i>hpaH</i>  | 2-oxo-hepta-3-ene-1,7-dioic acid hydratase                            |
| Cluster_210976 | 1  | 6  | 23 | 17 | 4   | 26  | AI | 2.89 | 0.0891 | 0.0479 |              | putative prophage protein                                             |
| Cluster_210977 | 2  | 8  | 22 | 15 | 8   | 35  | AI | 3.45 | 0.0631 | 0.0363 |              | conserved hypothetical protein                                        |
| Cluster_210978 | 2  | 8  | 22 | 15 | 8   | 35  | AI | 3.45 | 0.0631 | 0.0363 |              | conserved hypothetical protein                                        |
| Cluster_211001 | 23 | 15 | 1  | 8  | 96  | 65  | LI | 5.27 | 0.0217 | 0.0102 |              | phage virion morphogenesis protein                                    |
| Cluster_211547 | 19 | 23 | 5  | 0  | 79  | 100 | AI | 3.39 | 0.0654 | 0.0496 | <i>dnaE</i>  | DNA polymerase III, alpha subunit                                     |
| Cluster_211780 | 11 | 18 | 13 | 5  | 46  | 78  | AI | 3.94 | 0.0470 | 0.0355 |              | conserved hypothetical protein                                        |
| Cluster_21640  | 18 | 23 | 6  | 0  | 75  | 100 | AI | 4.54 | 0.0332 | 0.0219 | <i>nagE</i>  | PTS system, N-acetylglucosamine-specific IIBC component               |
| Cluster_217459 | 0  | 4  | 24 | 19 | 0   | 17  | AI | 2.60 | 0.1067 | 0.0496 |              | HTH domain protein                                                    |
| Cluster_21749  | 23 | 15 | 1  | 8  | 96  | 65  | LI | 5.27 | 0.0217 | 0.0102 |              | conserved hypothetical protein                                        |
| Cluster_217662 | 0  | 4  | 24 | 19 | 0   | 17  | AI | 2.60 | 0.1067 | 0.0496 |              | conserved hypothetical protein                                        |
| Cluster_21870  | 19 | 23 | 5  | 0  | 79  | 100 | AI | 3.39 | 0.0654 | 0.0496 | <i>ssb</i>   | single-stranded DNA-binding protein                                   |
| Cluster_218768 | 19 | 23 | 5  | 0  | 79  | 100 | AI | 3.39 | 0.0654 | 0.0496 | <i>dacB</i>  | D-alanyl-D-alanine carboxypeptidase/D-alanyl-D-alanine-endopeptidase  |
| Cluster_220312 | 23 | 15 | 1  | 8  | 96  | 65  | LI | 5.27 | 0.0217 | 0.0102 |              | baseplate J-like family protein                                       |
| Cluster_220402 | 19 | 23 | 5  | 0  | 79  | 100 | AI | 3.39 | 0.0654 | 0.0496 | <i>alr</i>   | alanine racemase                                                      |
| Cluster_22096  | 19 | 23 | 5  | 0  | 79  | 100 | AI | 3.39 | 0.0654 | 0.0496 |              | AAA-like domain protein                                               |
| Cluster_221391 | 11 | 2  | 13 | 21 | 46  | 9   | LI | 6.35 | 0.0118 | 0.0078 |              | conserved hypothetical protein                                        |
| Cluster_221813 | 19 | 9  | 5  | 14 | 79  | 39  | LI | 6.24 | 0.0125 | 0.0077 |              | conserved hypothetical protein                                        |
| Cluster_221865 | 22 | 13 | 2  | 10 | 92  | 57  | LI | 5.89 | 0.0152 | 0.0078 |              | bacterial type II and III secretion system family protein             |
| Cluster_222331 | 15 | 7  | 9  | 16 | 63  | 30  | LI | 3.65 | 0.0561 | 0.0415 |              | phage portal protein, HK97 family                                     |
| Cluster_222333 | 17 | 7  | 7  | 16 | 71  | 30  | LI | 6.14 | 0.0132 | 0.0087 |              | phage major capsid protein, HK97 family                               |
| Cluster_222761 | 9  | 1  | 15 | 22 | 38  | 4   | LI | 5.85 | 0.0155 | 0.0102 |              | putative escherichia coli chi7122 chi7122 genomic chromosome, chi7122 |
| Cluster_222808 | 6  | 0  | 18 | 23 | 25  | 0   | LI | 4.54 | 0.0332 | 0.0219 |              | polysaccharide biosynthesis/export family protein                     |
| Cluster_225861 | 3  | 11 | 21 | 12 | 13  | 48  | AI | 5.42 | 0.0199 | 0.0114 | <i>psu</i>   | polarity suppression protein                                          |
| Cluster_226889 | 3  | 10 | 21 | 13 | 13  | 43  | AI | 4.19 | 0.0406 | 0.0243 |              | putative P4-specific DNA primase                                      |
| Cluster_227923 | 19 | 11 | 5  | 12 | 79  | 48  | LI | 3.73 | 0.0534 | 0.0355 |              | conserved hypothetical protein                                        |
| Cluster_236094 | 5  | 0  | 19 | 23 | 21  | 0   | LI | 3.39 | 0.0654 | 0.0496 |              | insA N-terminal domain protein                                        |
| Cluster_236134 | 16 | 6  | 8  | 17 | 67  | 26  | LI | 6.22 | 0.0126 | 0.0084 | <i>dhfrI</i> | dihydrofolate reductase type 1                                        |
| Cluster_236296 | 23 | 15 | 1  | 8  | 96  | 65  | LI | 5.27 | 0.0217 | 0.0102 |              | ATPase subunit of terminase family protein                            |
| Cluster_237554 | 7  | 0  | 17 | 23 | 29  | 0   | LI | 5.75 | 0.0165 | 0.0094 |              | conserved hypothetical protein                                        |
| Cluster_237572 | 22 | 14 | 2  | 9  | 92  | 61  | LI | 4.61 | 0.0317 | 0.0173 |              | head decoration protein                                               |
| Cluster_237804 | 19 | 23 | 5  | 0  | 79  | 100 | AI | 3.39 | 0.0654 | 0.0496 |              | nitrate reductase, alpha subunit                                      |
| Cluster_23840  | 6  | 0  | 18 | 23 | 25  | 0   | LI | 4.54 | 0.0332 | 0.0219 |              | glycosyl transferase family 2 domain protein                          |
| Cluster_239025 | 7  | 1  | 17 | 22 | 29  | 4   | LI | 3.52 | 0.0608 | 0.0479 |              | phage terminase, small subunit, P27 family                            |
| Cluster_239026 | 7  | 1  | 17 | 22 | 29  | 4   | LI | 3.52 | 0.0608 | 0.0479 |              | phage Terminase family protein                                        |
| Cluster_239028 | 15 | 7  | 9  | 16 | 63  | 30  | LI | 3.65 | 0.0561 | 0.0415 |              | phage portal protein, HK97 family                                     |
| Cluster_239410 | 6  | 0  | 18 | 23 | 25  | 0   | LI | 4.54 | 0.0332 | 0.0219 |              | bacteriophage replication gene A family protein                       |
| Cluster_240829 | 7  | 0  | 17 | 23 | 29  | 0   | LI | 5.75 | 0.0165 | 0.0094 |              | hypothetical protein                                                  |
| Cluster_24188  | 21 | 13 | 3  | 10 | 88  | 57  | LI | 4.19 | 0.0406 | 0.0243 |              | conserved hypothetical protein                                        |
| Cluster_24314  | 5  | 0  | 19 | 23 | 21  | 0   | LI | 3.39 | 0.0654 | 0.0496 |              | degT/DnrJ/EryC1/StrS aminotransferase family protein                  |
| Cluster_24348  | 5  | 14 | 19 | 9  | 21  | 61  | AI | 6.24 | 0.0125 | 0.0077 |              | phage tail tape measure protein, lambda family                        |
| Cluster_244107 | 24 | 18 | 0  | 5  | 100 | 78  | LI | 3.78 | 0.0520 | 0.0219 |              | putative purine permease YgfU                                         |
| Cluster_245260 | 19 | 23 | 5  | 0  | 79  | 100 | AI | 3.39 | 0.0654 | 0.0496 | <i>cheA</i>  | chemotaxis protein CheA                                               |
| Cluster_246425 | 6  | 0  | 18 | 23 | 25  | 0   | LI | 4.54 | 0.0332 | 0.0219 |              | conserved hypothetical protein                                        |
| Cluster_246778 | 9  | 2  | 15 | 21 | 38  | 9   | LI | 3.95 | 0.0469 | 0.0363 |              | conserved hypothetical protein                                        |
| Cluster_247403 | 5  | 0  | 19 | 23 | 21  | 0   | LI | 3.39 | 0.0654 | 0.0496 |              | glycosyl transferase 2 family protein                                 |
| Cluster_248097 | 12 | 4  | 12 | 19 | 50  | 17  | LI | 4.20 | 0.0403 | 0.0305 |              | conserved hypothetical protein                                        |
| Cluster_248119 | 13 | 5  | 11 | 18 | 54  | 22  | LI | 3.94 | 0.0470 | 0.0355 |              | dnaB-like helicase N terminal domain protein                          |
| Cluster_252971 | 5  | 0  | 19 | 23 | 21  | 0   | LI | 3.39 | 0.0654 | 0.0496 |              | HNH endonuclease family protein                                       |
| Cluster_252976 | 17 | 7  | 7  | 16 | 71  | 30  | LI | 6.14 | 0.0132 | 0.0087 |              | phage prohead protease, HK97 family                                   |
| Cluster_257914 | 24 | 18 | 0  | 5  | 100 | 78  | LI | 3.78 | 0.0520 | 0.0219 | <i>cadC</i>  | transcriptional activator CadC                                        |
| Cluster_258248 | 6  | 13 | 18 | 10 | 25  | 57  | AI | 3.63 | 0.0569 |        |              |                                                                       |

|                |    |    |    |    |     |     |    |       |        |        |                                                                     |
|----------------|----|----|----|----|-----|-----|----|-------|--------|--------|---------------------------------------------------------------------|
| Cluster_261666 | 8  | 1  | 16 | 22 | 33  | 4   | LI | 4.64  | 0.0313 | 0.0226 | AAA domain protein                                                  |
| Cluster_261814 | 6  | 0  | 18 | 23 | 25  | 0   | LI | 4.54  | 0.0332 | 0.0219 | conserved hypothetical protein                                      |
| Cluster_261875 | 5  | 0  | 19 | 23 | 21  | 0   | LI | 3.39  | 0.0654 | 0.0496 | hypothetical protein                                                |
| Cluster_262069 | 12 | 2  | 12 | 21 | 50  | 9   | LI | 7.71  | 0.0055 | 0.0034 | istB-like ATP binding family protein                                |
| Cluster_262139 | 5  | 0  | 19 | 23 | 21  | 0   | LI | 3.39  | 0.0654 | 0.0496 | conserved hypothetical protein                                      |
| Cluster_263937 | 9  | 1  | 15 | 22 | 38  | 4   | LI | 5.85  | 0.0155 | 0.0102 | conserved hypothetical protein                                      |
| Cluster_263945 | 7  | 0  | 17 | 23 | 29  | 0   | LI | 5.75  | 0.0165 | 0.0094 | conserved hypothetical protein                                      |
| Cluster_263946 | 7  | 0  | 17 | 23 | 29  | 0   | LI | 5.75  | 0.0165 | 0.0094 | phage major capsid E family protein                                 |
| Cluster_263948 | 7  | 0  | 17 | 23 | 29  | 0   | LI | 5.75  | 0.0165 | 0.0094 | conserved hypothetical protein                                      |
| Cluster_264521 | 19 | 23 | 5  | 0  | 79  | 100 | AI | 3.39  | 0.0654 | 0.0496 | conserved hypothetical protein                                      |
| Cluster_264826 | 19 | 9  | 5  | 14 | 79  | 39  | LI | 6.24  | 0.0125 | 0.0077 | yagB/YeeU/Yjz family protein                                        |
| Cluster_265225 | 18 | 23 | 6  | 0  | 75  | 100 | AI | 4.54  | 0.0332 | 0.0219 | PRD domain protein                                                  |
| Cluster_265334 | 19 | 23 | 5  | 0  | 79  | 100 | AI | 3.39  | 0.0654 | 0.0496 | <i>mdfA</i>                                                         |
| Cluster_266287 | 5  | 0  | 19 | 23 | 21  | 0   | LI | 3.39  | 0.0654 | 0.0496 | multidrug transporter MdfA                                          |
| Cluster_266373 | 17 | 7  | 7  | 16 | 71  | 30  | LI | 6.14  | 0.0132 | 0.0087 | hypothetical protein                                                |
| Cluster_266615 | 16 | 6  | 8  | 17 | 67  | 26  | LI | 6.22  | 0.0126 | 0.0084 | lysis S family protein                                              |
| Cluster_266630 | 12 | 4  | 12 | 19 | 50  | 17  | LI | 4.20  | 0.0403 | 0.0305 | putative yubO                                                       |
| Cluster_267010 | 7  | 1  | 17 | 22 | 29  | 4   | LI | 3.52  | 0.0608 | 0.0479 | conserved hypothetical protein                                      |
| Cluster_267179 | 20 | 11 | 4  | 12 | 83  | 48  | LI | 5.11  | 0.0238 | 0.0145 | putative pcar                                                       |
| Cluster_268703 | 3  | 9  | 21 | 14 | 13  | 39  | AI | 3.09  | 0.0787 | 0.0490 | conserved hypothetical protein                                      |
| Cluster_269540 | 19 | 23 | 5  | 0  | 79  | 100 | AI | 3.39  | 0.0654 | 0.0496 | putative non-LEE-encoded effector EspJ                              |
| Cluster_271379 | 15 | 22 | 9  | 1  | 63  | 96  | AI | 5.85  | 0.0155 | 0.0102 | <i>espJ</i>                                                         |
| Cluster_271578 | 4  | 13 | 20 | 10 | 17  | 57  | AI | 6.45  | 0.0111 | 0.0065 | <i>can</i>                                                          |
| Cluster_271588 | 1  | 7  | 23 | 16 | 4   | 30  | AI | 4.03  | 0.0447 | 0.0226 | carbonic anhydrase 2                                                |
| Cluster_272862 | 5  | 0  | 19 | 23 | 21  | 0   | LI | 3.39  | 0.0654 | 0.0496 | glycosyl hydrolase family 65, N-terminal domain protein             |
| Cluster_272941 | 19 | 6  | 5  | 17 | 79  | 26  | LI | 11.24 | 0.0008 | 0.0004 | conserved hypothetical protein                                      |
| Cluster_274418 | 4  | 11 | 20 | 12 | 17  | 48  | AI | 3.91  | 0.0479 | 0.0305 | phage tail E family protein                                         |
| Cluster_275430 | 19 | 23 | 5  | 0  | 79  | 100 | AI | 3.39  | 0.0654 | 0.0496 | mu-like prophage FluMu gp41 family protein                          |
| Cluster_275815 | 18 | 23 | 6  | 0  | 75  | 100 | AI | 4.54  | 0.0332 | 0.0219 | arginine/agmatine antiporter                                        |
| Cluster_276264 | 11 | 2  | 13 | 21 | 46  | 9   | LI | 6.35  | 0.0118 | 0.0078 | <i>adiC</i>                                                         |
| Cluster_276292 | 19 | 23 | 5  | 0  | 79  | 100 | AI | 3.39  | 0.0654 | 0.0496 | GDP-mannose mannosyl hydrolase                                      |
| Cluster_276697 | 8  | 1  | 16 | 22 | 33  | 4   | LI | 4.64  | 0.0313 | 0.0226 | replication regulatory RepB family protein                          |
| Cluster_276834 | 21 | 14 | 3  | 9  | 88  | 61  | LI | 3.09  | 0.0787 | 0.0490 | stress-induced bacterial acidophilic repeat motif family protein    |
| Cluster_277010 | 20 | 12 | 4  | 11 | 83  | 52  | LI | 3.91  | 0.0479 | 0.0305 | conserved hypothetical protein                                      |
| Cluster_280171 | 18 | 23 | 6  | 0  | 75  | 100 | AI | 4.54  | 0.0332 | 0.0219 | clp protease family protein                                         |
| Cluster_281686 | 13 | 5  | 11 | 18 | 54  | 22  | LI | 3.94  | 0.0470 | 0.0355 | transposase DDE domain protein                                      |
| Cluster_281878 | 7  | 1  | 17 | 22 | 29  | 4   | LI | 3.52  | 0.0608 | 0.0479 | tat-linked quality control protein TatD                             |
| Cluster_286129 | 23 | 15 | 1  | 8  | 96  | 65  | LI | 5.27  | 0.0217 | 0.0102 | conserved hypothetical protein                                      |
| Cluster_286226 | 19 | 23 | 5  | 0  | 79  | 100 | AI | 3.39  | 0.0654 | 0.0496 | helix-turn-helix domain protein                                     |
| Cluster_286879 | 6  | 0  | 18 | 23 | 25  | 0   | LI | 4.54  | 0.0332 | 0.0219 | P2 phage tail completion R family protein                           |
| Cluster_286883 | 5  | 0  | 19 | 23 | 21  | 0   | LI | 3.39  | 0.0654 | 0.0496 | <i>cybH</i>                                                         |
| Cluster_287268 | 11 | 3  | 13 | 20 | 46  | 13  | LI | 4.57  | 0.0325 | 0.0243 | ni/Fe-hydrogenase, b-type cytochrome subunit                        |
| Cluster_289072 | 9  | 2  | 15 | 21 | 38  | 9   | LI | 3.95  | 0.0469 | 0.0363 | conserved hypothetical protein                                      |
| Cluster_289981 | 12 | 2  | 12 | 21 | 50  | 9   | LI | 7.71  | 0.0055 | 0.0034 | conserved hypothetical protein                                      |
| Cluster_290560 | 19 | 23 | 5  | 0  | 79  | 100 | AI | 3.39  | 0.0654 | 0.0496 | transposase DDE domain protein                                      |
| Cluster_291165 | 5  | 0  | 19 | 23 | 21  | 0   | LI | 3.39  | 0.0654 | 0.0496 | integrase core domain protein                                       |
| Cluster_291297 | 5  | 0  | 19 | 23 | 21  | 0   | LI | 3.39  | 0.0654 | 0.0496 | AAA-like domain protein                                             |
| Cluster_291813 | 12 | 4  | 12 | 19 | 50  | 17  | LI | 4.20  | 0.0403 | 0.0305 | phage integrase family protein                                      |
| Cluster_292258 | 8  | 1  | 16 | 22 | 33  | 4   | LI | 4.64  | 0.0313 | 0.0226 | glycosyl transferase 2 family protein                               |
| Cluster_295885 | 18 | 23 | 6  | 0  | 75  | 100 | AI | 4.54  | 0.0332 | 0.0219 | conserved hypothetical protein                                      |
| Cluster_296966 | 0  | 5  | 24 | 18 | 0   | 22  | AI | 3.78  | 0.0520 | 0.0219 | conserved hypothetical protein                                      |
| Cluster_297203 | 3  | 10 | 21 | 13 | 13  | 43  | AI | 4.19  | 0.0406 | 0.0243 | acetyltransferase domain protein                                    |
| Cluster_301785 | 4  | 11 | 20 | 12 | 17  | 48  | AI | 3.91  | 0.0479 | 0.0305 | conserved hypothetical protein                                      |
| Cluster_302042 | 21 | 14 | 3  | 9  | 88  | 61  | LI | 3.09  | 0.0787 | 0.0490 | phage tail tape measure protein, TP901 family, core region          |
| Cluster_302107 | 14 | 6  | 10 | 17 | 58  | 26  | LI | 3.76  | 0.0524 | 0.0392 | type II secretion system (T2SS), F family protein                   |
| Cluster_302692 | 13 | 5  | 11 | 18 | 54  | 22  | LI | 3.94  | 0.0470 | 0.0355 | conserved hypothetical protein                                      |
| Cluster_307965 | 12 | 3  | 12 | 20 | 50  | 13  | LI | 5.78  | 0.0162 | 0.0114 | hypothetical protein                                                |
| Cluster_309396 | 12 | 4  | 12 | 19 | 50  | 17  | LI | 4.20  | 0.0403 | 0.0305 | trp family protein                                                  |
| Cluster_310837 | 0  | 5  | 24 | 18 | 0   | 22  | AI | 3.78  | 0.0520 | 0.0219 | conserved hypothetical protein                                      |
| Cluster_313189 | 23 | 15 | 1  | 8  | 96  | 65  | LI | 5.27  | 0.0217 | 0.0102 | trp family protein                                                  |
| Cluster_313761 | 9  | 2  | 15 | 21 | 38  | 9   | LI | 3.95  | 0.0469 | 0.0363 | killing protein KilR                                                |
| Cluster_315512 | 0  | 5  | 24 | 18 | 0   | 22  | AI | 3.78  | 0.0520 | 0.0219 | putative predicted protein                                          |
| Cluster_315513 | 0  | 5  | 24 | 18 | 0   | 22  | AI | 3.78  | 0.0520 | 0.0219 | HNH endonuclease family protein                                     |
| Cluster_315514 | 0  | 5  | 24 | 18 | 0   | 22  | AI | 3.78  | 0.0520 | 0.0219 | <i>hpaA</i>                                                         |
| Cluster_315518 | 0  | 5  | 24 | 18 | 0   | 22  | AI | 3.78  | 0.0520 | 0.0219 | 4-hydroxyphenylacetate catabolism regulatory protein HpaA           |
| Cluster_315519 | 0  | 5  | 24 | 18 | 0   | 22  | AI | 3.78  | 0.0520 | 0.0219 | <i>hpaX</i>                                                         |
| Cluster_315520 | 0  | 5  | 24 | 18 | 0   | 22  | AI | 3.78  | 0.0520 | 0.0219 | 4-hydroxyphenylacetate permease                                     |
| Cluster_315743 | 19 | 23 | 5  | 0  | 79  | 100 | AI | 3.39  | 0.0654 | 0.0496 | <i>hpaI</i>                                                         |
| Cluster_316170 | 0  | 6  | 24 | 17 | 0   | 26  | AI | 5.03  | 0.0250 | 0.0094 | 2,4-dihydroxyhept-2-ene-1,7-dioic acid aldolase                     |
| Cluster_316814 | 1  | 7  | 23 | 16 | 4   | 30  | AI | 4.03  | 0.0447 | 0.0226 | 5-carboxymethyl-2-hydroxyacetate semialdehyde dehydrogenase         |
| Cluster_316818 | 1  | 6  | 23 | 17 | 4   | 26  | AI | 2.89  | 0.0891 | 0.0479 | <i>hpcE</i>                                                         |
| Cluster_317131 | 1  | 7  | 23 | 16 | 4   | 30  | AI | 4.03  | 0.0447 | 0.0226 | homoprotocatechuate catabolism bifunctional isomerase/decarboxylase |
| Cluster_318890 | 0  | 5  | 24 | 18 | 0   | 22  | AI | 3.78  | 0.0520 | 0.0219 | <i>hpaR</i>                                                         |
| Cluster_318894 | 0  | 5  | 24 | 18 | 0   | 22  | AI | 3.78  | 0.0520 | 0.0219 | homoprotocatechuate degradation operon regulator, HpaR              |
| Cluster_321224 | 2  | 8  | 22 | 15 | 8   | 35  | AI | 3.45  | 0.0631 | 0.0363 | <i>ycdY</i>                                                         |
| Cluster_321885 | 0  | 4  | 24 | 19 | 0   | 17  | AI | 2.60  | 0.1067 | 0.0496 | chaperone protein YcdY                                              |
| Cluster_321886 | 0  | 4  | 24 | 19 | 0   | 17  | AI | 2.60  | 0.1067 | 0.0496 | putative predicted protein                                          |
| Cluster_32291  | 18 | 23 | 6  | 0  | 75  | 100 | AI | 4.54  | 0.0332 | 0.0219 | AAA domain protein                                                  |
| Cluster_322922 | 15 | 4  | 9  | 19 | 63  | 17  | LI | 8.14  | 0.0043 | 0.0027 | putative predicted protein                                          |
| Cluster_324754 | 22 | 15 | 2  | 8  | 92  | 65  | LI | 3.45  | 0.0631 | 0.0363 | conserved hypothetical protein                                      |
| Cluster_326026 | 2  | 8  | 22 | 15 | 8   | 35  | AI | 3.45  | 0.0631 | 0.0363 | conserved hypothetical protein                                      |
| Cluster_326414 | 1  | 6  | 23 | 17 | 4   | 26  | AI | 2.89  | 0.0891 | 0.0479 | fimbrial family protein                                             |
| Cluster_326791 | 5  | 0  | 19 | 23 | 21  | 0   | LI | 3.39  | 0.0654 | 0.0496 | dinI-like family protein                                            |
| Cluster_326910 | 22 | 13 | 2  | 10 | 92  | 57  | LI | 5.89  | 0.0152 | 0.0078 | ogr/Delta-like zinc finger family protein                           |
| Cluster_327168 | 18 | 7  | 6  | 16 | 75  | 30  | LI | 7.66  | 0.0056 | 0.0034 | hydantoinase/oxoprolinase family protein                            |
| Cluster_330511 | 22 | 13 | 2  | 10 | 92  | 57  | LI | 5.89  | 0.0152 | 0.0078 | helix-turn-helix domain protein                                     |
| Cluster_331430 | 24 | 19 | 0  | 4  | 100 | 83  | LI | 2.60  | 0.1067 | 0.0496 | phage major tail tube protein                                       |
| Cluster_332291 | 23 | 15 | 1  | 8  | 96  | 65  | LI | 5.27  | 0.0217 | 0.0102 | conserved hypothetical protein                                      |
| Cluster_333715 | 19 | 23 | 5  | 0  | 79  | 100 | AI | 3.39  | 0.0654 | 0.0496 | phage small terminase subunit                                       |
| Cluster_335585 | 19 | 23 | 5  | 0  | 79  | 100 | AI | 3.39  | 0.0654 | 0.0496 | DNA-damage-inducible protein I                                      |
| Cluster_337809 | 14 | 6  | 10 | 17 | 58  | 26  | LI | 3.76  | 0.0524 | 0.0392 | ybgS-like family protein                                            |
| Cluster_34074  | 17 | 7  | 7  | 16 | 71  | 30  | LI | 6.14  | 0.0132 | 0.0087 | putative antigen 43 domain protein                                  |
| Cluster_341403 | 24 | 19 | 0  | 4  | 100 | 83  | LI | 2.60  | 0.1067 | 0.0496 | lysis S family protein                                              |
| Cluster_34159  | 13 | 2  | 11 | 21 | 54  | 9   | LI | 9.18  | 0.0024 | 0.0013 | L-xylulose/3-keto-L-gulonate kinase                                 |
| Cluster_342277 | 23 | 15 | 1  | 8  | 96  | 65  | LI | 5.27  | 0.0217 | 0.0102 | conserved hypothetical protein                                      |
| Cluster_342342 | 13 | 5  | 11 | 18 | 54  | 22  | LI | 3.94  | 0.0470 | 0.0355 | ogr/Delta-like zinc finger family protein                           |
| Cluster_342343 | 13 | 5  | 11 | 18 | 54  | 22  | LI | 3.94  | 0.0470 | 0.0355 | conserved hypothetical protein                                      |
| Cluster_342345 | 12 | 4  | 12 | 19 | 50  | 17  | LI | 4.20  | 0.0403 | 0.0305 | conserved hypothetical protein                                      |
| Cluster_342430 | 21 | 13 | 3  | 10 | 88  | 57  | LI | 4.19  | 0.0406 | 0.0243 | conserved hypothetical protein                                      |

|                |    |    |    |    |     |     |    |       |        |        |                                                                                   |
|----------------|----|----|----|----|-----|-----|----|-------|--------|--------|-----------------------------------------------------------------------------------|
| Cluster_342620 | 12 | 4  | 12 | 19 | 50  | 17  | LI | 4.20  | 0.0403 | 0.0305 | putative predicted protein                                                        |
| Cluster_342998 | 17 | 6  | 7  | 17 | 71  | 26  | LI | 7.71  | 0.0055 | 0.0034 | phage tail protein I                                                              |
| Cluster_343399 | 23 | 14 | 1  | 9  | 96  | 61  | LI | 6.61  | 0.0101 | 0.0044 | phage P2 GpU family protein                                                       |
| Cluster_345268 | 18 | 23 | 6  | 0  | 75  | 100 | AI | 4.54  | 0.0332 | 0.0219 | <i>fryC</i> fructose-like permease IIC component 1                                |
| Cluster_345283 | 19 | 23 | 5  | 0  | 79  | 100 | AI | 3.39  | 0.0654 | 0.0496 | carbon-nitrogen hydrolase family protein                                          |
| Cluster_345362 | 24 | 19 | 0  | 4  | 100 | 83  | LI | 2.60  | 0.1067 | 0.0496 | <i>araD</i> L-ribulose-5-phosphate 4-epimerase                                    |
| Cluster_346478 | 21 | 11 | 3  | 12 | 88  | 48  | LI | 6.78  | 0.0092 | 0.0050 | conserved hypothetical protein                                                    |
| Cluster_346834 | 22 | 15 | 2  | 8  | 92  | 65  | LI | 3.45  | 0.0631 | 0.0363 | conserved hypothetical protein                                                    |
| Cluster_347183 | 20 | 11 | 4  | 12 | 83  | 48  | LI | 5.11  | 0.0238 | 0.0145 | small Multidrug Resistance family protein                                         |
| Cluster_347409 | 23 | 13 | 1  | 10 | 96  | 57  | LI | 8.05  | 0.0045 | 0.0018 | phage tail sheath family protein                                                  |
| Cluster_347413 | 23 | 15 | 1  | 8  | 96  | 65  | LI | 5.27  | 0.0217 | 0.0102 | hok/gef family protein                                                            |
| Cluster_347784 | 23 | 15 | 1  | 8  | 96  | 65  | LI | 5.27  | 0.0217 | 0.0102 | phage holin family protein                                                        |
| Cluster_348249 | 19 | 23 | 5  | 0  | 79  | 100 | AI | 3.39  | 0.0654 | 0.0496 | neutral zinc metalloproteinase family protein                                     |
| Cluster_348353 | 19 | 23 | 5  | 0  | 79  | 100 | AI | 3.39  | 0.0654 | 0.0496 | <i>yajR</i> inner membrane transport protein YajR                                 |
| Cluster_348774 | 23 | 15 | 1  | 8  | 96  | 65  | LI | 5.27  | 0.0217 | 0.0102 | D-alanyl-D-alanine carboxypeptidase family protein                                |
| Cluster_3723   | 0  | 6  | 24 | 17 | 0   | 26  | AI | 5.03  | 0.0250 | 0.0094 | conserved hypothetical protein                                                    |
| Cluster_3745   | 4  | 11 | 20 | 12 | 17  | 48  | AI | 3.91  | 0.0479 | 0.0305 | aminotransferase class I and II family protein                                    |
| Cluster_38037  | 0  | 5  | 24 | 18 | 0   | 22  | AI | 3.78  | 0.0520 | 0.0219 | <i>hpaD</i> 3,4-dihydroxyphenylacetate 2,3-dioxygenase                            |
| Cluster_38989  | 0  | 5  | 24 | 18 | 0   | 22  | AI | 3.78  | 0.0520 | 0.0219 | conserved hypothetical protein                                                    |
| Cluster_40177  | 22 | 13 | 2  | 10 | 92  | 57  | LI | 5.89  | 0.0152 | 0.0078 | major tail V domain protein                                                       |
| Cluster_43613  | 15 | 7  | 9  | 16 | 63  | 30  | LI | 3.65  | 0.0561 | 0.0415 | phage gp6-like head-tail connector family protein                                 |
| Cluster_43808  | 23 | 16 | 1  | 7  | 96  | 70  | LI | 4.03  | 0.0447 | 0.0226 | type II/IV secretion system family protein                                        |
| Cluster_44635  | 17 | 23 | 7  | 0  | 71  | 100 | AI | 5.75  | 0.0165 | 0.0094 | type III secretion , HrpO family protein                                          |
| Cluster_4527   | 22 | 13 | 2  | 10 | 92  | 57  | LI | 5.89  | 0.0152 | 0.0078 | tail attachment protein                                                           |
| Cluster_46213  | 3  | 9  | 21 | 14 | 13  | 39  | AI | 3.09  | 0.0787 | 0.0490 | putative transmembrane protein                                                    |
| Cluster_46843  | 13 | 5  | 11 | 18 | 54  | 22  | LI | 3.94  | 0.0470 | 0.0355 | dnaB-like helicase N terminal domain protein                                      |
| Cluster_47784  | 4  | 11 | 20 | 12 | 17  | 48  | AI | 3.91  | 0.0479 | 0.0305 | bacterial regulatory, luxR family protein                                         |
| Cluster_48960  | 7  | 1  | 17 | 22 | 29  | 4   | LI | 3.52  | 0.0608 | 0.0479 | conserved hypothetical protein                                                    |
| Cluster_5054   | 19 | 23 | 5  | 0  | 79  | 100 | AI | 3.39  | 0.0654 | 0.0496 | uracil-xanthine permease family protein                                           |
| Cluster_51806  | 19 | 23 | 5  | 0  | 79  | 100 | AI | 3.39  | 0.0654 | 0.0496 | <i>ptsP</i> phosphoenolpyruvate-protein phosphotransferase                        |
| Cluster_52793  | 19 | 11 | 5  | 12 | 79  | 48  | LI | 3.73  | 0.0534 | 0.0355 | <i>mngB</i> mannosylglycerate hydrolase                                           |
| Cluster_5286   | 19 | 23 | 5  | 0  | 79  | 100 | AI | 3.39  | 0.0654 | 0.0496 | <i>atpF</i> ATP synthase F0, B subunit                                            |
| Cluster_53395  | 12 | 4  | 12 | 19 | 50  | 17  | LI | 4.20  | 0.0403 | 0.0305 | haemolysin expression modulating family protein                                   |
| Cluster_53578  | 22 | 13 | 2  | 10 | 92  | 57  | LI | 5.89  | 0.0152 | 0.0078 | putative protein                                                                  |
| Cluster_53910  | 1  | 6  | 23 | 17 | 4   | 26  | AI | 2.89  | 0.0891 | 0.0479 | <i>intA</i> prophage CP4-57 integrase                                             |
| Cluster_55403  | 4  | 13 | 20 | 10 | 17  | 57  | AI | 6.45  | 0.0111 | 0.0065 | helix-turn-helix domain protein                                                   |
| Cluster_57003  | 4  | 13 | 20 | 10 | 17  | 57  | AI | 6.45  | 0.0111 | 0.0065 | putative phage immunity repressor protein                                         |
| Cluster_58271  | 9  | 1  | 15 | 22 | 38  | 4   | LI | 5.85  | 0.0155 | 0.0102 | conserved hypothetical protein                                                    |
| Cluster_59004  | 17 | 7  | 16 | 7  | 16  | 30  | LI | 6.14  | 0.0132 | 0.0087 | phage prohead protease, HK97 family                                               |
| Cluster_59324  | 8  | 1  | 16 | 22 | 33  | 4   | LI | 4.64  | 0.0313 | 0.0226 | putative acetyltransferase                                                        |
| Cluster_59689  | 12 | 3  | 12 | 20 | 50  | 13  | LI | 5.78  | 0.0162 | 0.0114 | putative incFII replication protein RepA3                                         |
| Cluster_66669  | 7  | 1  | 17 | 22 | 29  | 4   | LI | 3.52  | 0.0608 | 0.0479 | conserved hypothetical protein                                                    |
| Cluster_68405  | 10 | 18 | 14 | 5  | 42  | 78  | AI | 5.10  | 0.0239 | 0.0171 | <i>fimA</i> type-1 fimbrial protein, A chain                                      |
| Cluster_68745  | 23 | 15 | 1  | 8  | 96  | 65  | LI | 5.27  | 0.0217 | 0.0102 | phage portal protein, PBSX family                                                 |
| Cluster_69484  | 5  | 0  | 19 | 23 | 21  | 0   | LI | 3.39  | 0.0654 | 0.0496 | DNA N-6-adenine-methyltransferase family protein                                  |
| Cluster_69487  | 5  | 0  | 19 | 23 | 21  | 0   | LI | 3.39  | 0.0654 | 0.0496 | conserved hypothetical protein                                                    |
| Cluster_69489  | 5  | 0  | 19 | 23 | 21  | 0   | LI | 3.39  | 0.0654 | 0.0496 | conserved hypothetical protein                                                    |
| Cluster_70068  | 13 | 5  | 11 | 18 | 54  | 22  | LI | 3.94  | 0.0470 | 0.0355 | conserved hypothetical protein                                                    |
| Cluster_71993  | 5  | 0  | 19 | 23 | 21  | 0   | LI | 3.39  | 0.0654 | 0.0496 | putative membrane protein                                                         |
| Cluster_71994  | 5  | 0  | 19 | 23 | 21  | 0   | LI | 3.39  | 0.0654 | 0.0496 | glycosyl transferase 11 family protein                                            |
| Cluster_71995  | 5  | 0  | 19 | 23 | 21  | 0   | LI | 3.39  | 0.0654 | 0.0496 | phosphoglucomutase/phosphomannomutase, alpha/beta/alpha domain III family protein |
| Cluster_71996  | 5  | 0  | 19 | 23 | 21  | 0   | LI | 3.39  | 0.0654 | 0.0496 | mannose-1-phosphate guanylyltransferase/mannose-6-phosphate isomerase             |
| Cluster_72088  | 9  | 2  | 15 | 21 | 38  | 9   | LI | 3.95  | 0.0469 | 0.0363 | glycosyl transferases group 1 family protein                                      |
| Cluster_72092  | 9  | 2  | 15 | 21 | 38  | 9   | LI | 3.95  | 0.0469 | 0.0363 | transposase DDE domain protein                                                    |
| Cluster_72094  | 11 | 3  | 13 | 20 | 46  | 13  | LI | 4.57  | 0.0325 | 0.0243 | phage integrase family protein                                                    |
| Cluster_72173  | 24 | 19 | 0  | 4  | 100 | 83  | LI | 2.60  | 0.1067 | 0.0496 | xylose isomerase-like TIM barrel family protein                                   |
| Cluster_72685  | 5  | 0  | 19 | 23 | 21  | 0   | LI | 3.39  | 0.0654 | 0.0496 | hypothetical protein                                                              |
| Cluster_73386  | 5  | 0  | 19 | 23 | 21  | 0   | LI | 3.39  | 0.0654 | 0.0496 | caudovirales tail fibre assembly family protein                                   |
| Cluster_73491  | 9  | 2  | 15 | 21 | 38  | 9   | LI | 3.95  | 0.0469 | 0.0363 | PIN domain protein                                                                |
| Cluster_73497  | 8  | 1  | 16 | 22 | 33  | 4   | LI | 4.64  | 0.0313 | 0.0226 | conserved hypothetical protein                                                    |
| Cluster_73598  | 6  | 0  | 18 | 23 | 25  | 0   | LI | 4.54  | 0.0332 | 0.0219 | conserved hypothetical protein                                                    |
| Cluster_73840  | 5  | 0  | 19 | 23 | 21  | 0   | LI | 3.39  | 0.0654 | 0.0496 | conserved hypothetical protein                                                    |
| Cluster_73967  | 23 | 15 | 1  | 8  | 96  | 65  | LI | 5.27  | 0.0217 | 0.0102 | phage Tail Protein X family protein                                               |
| Cluster_74186  | 6  | 0  | 18 | 23 | 25  | 0   | LI | 4.54  | 0.0332 | 0.0219 | helix-turn-helix domain protein                                                   |
| Cluster_74390  | 12 | 2  | 12 | 21 | 50  | 9   | LI | 7.71  | 0.0055 | 0.0034 | hypothetical protein                                                              |
| Cluster_74420  | 19 | 6  | 5  | 17 | 79  | 26  | LI | 11.24 | 0.0008 | 0.0004 | conserved hypothetical protein                                                    |
| Cluster_78310  | 24 | 19 | 0  | 4  | 100 | 83  | LI | 2.60  | 0.1067 | 0.0496 | peptidase M23 family protein                                                      |
| Cluster_78687  | 22 | 13 | 2  | 10 | 92  | 57  | LI | 5.89  | 0.0152 | 0.0078 | minor tail protein U                                                              |
| Cluster_79151  | 22 | 14 | 2  | 9  | 92  | 61  | LI | 4.61  | 0.0317 | 0.0173 | bundlin family protein                                                            |
| Cluster_79549  | 19 | 23 | 5  | 0  | 79  | 100 | AI | 3.39  | 0.0654 | 0.0496 | <i>prpR</i> propionate catabolism operon regulatory protein PrpR                  |
| Cluster_8046   | 0  | 4  | 24 | 19 | 0   | 17  | AI | 2.60  | 0.1067 | 0.0496 | hypothetical protein                                                              |
| Cluster_81331  | 18 | 23 | 6  | 0  | 75  | 100 | AI | 4.54  | 0.0332 | 0.0219 | IppC lipofamily protein                                                           |
| Cluster_81842  | 19 | 23 | 5  | 0  | 79  | 100 | AI | 3.39  | 0.0654 | 0.0496 | MATE efflux family protein                                                        |
| Cluster_81862  | 19 | 23 | 5  | 0  | 79  | 100 | AI | 3.39  | 0.0654 | 0.0496 | conserved hypothetical protein                                                    |
| Cluster_82353  | 22 | 13 | 2  | 10 | 92  | 57  | LI | 5.89  | 0.0152 | 0.0078 | phage late control gene D family protein                                          |
| Cluster_82835  | 16 | 6  | 8  | 17 | 67  | 26  | LI | 6.22  | 0.0126 | 0.0084 | conserved hypothetical protein                                                    |
| Cluster_83084  | 19 | 23 | 5  | 0  | 79  | 100 | AI | 3.39  | 0.0654 | 0.0496 | <i>purD</i> phosphoribosylamine-glycine ligase                                    |
| Cluster_83254  | 6  | 0  | 18 | 23 | 25  | 0   | LI | 4.54  | 0.0332 | 0.0219 | glycosyl transferases group 1 family protein                                      |
| Cluster_83927  | 6  | 0  | 18 | 23 | 25  | 0   | LI | 4.54  | 0.0332 | 0.0219 | <i>fatA</i> dTDP-6-deoxy-3,4-keto-hexulose isomerase                              |
| Cluster_83929  | 6  | 0  | 18 | 23 | 25  | 0   | LI | 4.54  | 0.0332 | 0.0219 | <i>rfbB</i> dTDP-glucose 4,6-dehydratase                                          |
| Cluster_84211  | 15 | 7  | 9  | 16 | 63  | 30  | LI | 3.65  | 0.0561 | 0.0415 | conserved hypothetical protein                                                    |
| Cluster_87728  | 19 | 23 | 5  | 0  | 79  | 100 | AI | 3.39  | 0.0654 | 0.0496 | <i>phrB</i> deoxyribodipyrimidine photo-lyase                                     |
| Cluster_88468  | 24 | 19 | 0  | 4  | 100 | 83  | LI | 2.60  | 0.1067 | 0.0496 | <i>yqjJ</i> inner membrane protein YqjJ                                           |
| Cluster_88571  | 18 | 7  | 6  | 16 | 75  | 30  | LI | 7.66  | 0.0056 | 0.0034 | regulatory protein cro                                                            |
| Cluster_89657  | 24 | 19 | 0  | 4  | 100 | 83  | LI | 2.60  | 0.1067 | 0.0496 | bacterial extracellular solute-binding , 7 family protein                         |
| Cluster_902    | 9  | 16 | 15 | 7  | 38  | 70  | AI | 3.65  | 0.0561 | 0.0415 | outer membrane transport family protein                                           |
| Cluster_92542  | 0  | 5  | 24 | 18 | 0   | 22  | AI | 3.78  | 0.0520 | 0.0219 | <i>espS</i> putative t3SS effector protein EspS                                   |
| Cluster_9334   | 0  | 4  | 24 | 19 | 0   | 17  | AI | 2.60  | 0.1067 | 0.0496 | conserved hypothetical protein                                                    |
| Cluster_93472  | 1  | 6  | 23 | 17 | 4   | 26  | AI | 2.89  | 0.0891 | 0.0479 | prophage CP4-57 integrase                                                         |
| Cluster_93726  | 19 | 23 | 5  | 0  | 79  | 100 | AI | 3.39  | 0.0654 | 0.0496 | <i>tolA</i> protein TolA                                                          |
| Cluster_94384  | 23 | 16 | 1  | 7  | 96  | 70  | LI | 4.03  | 0.0447 | 0.0226 | transposase, Mutator family protein                                               |
| Cluster_94431  | 0  | 4  | 24 | 19 | 0   | 17  | AI | 2.60  | 0.1067 | 0.0496 | hypothetical protein                                                              |
| Cluster_99113  | 16 | 7  | 8  | 16 | 67  | 30  | LI | 4.81  | 0.0284 | 0.0199 | putative membrane protein                                                         |
| Cluster_99362  | 14 | 5  | 10 | 18 | 58  | 22  | LI | 5.10  | 0.0239 | 0.0171 | resolvase, N terminal domain protein                                              |

Non-lethal Symptomatic (NSI) vs. Asymptomatic (AI)

| No. of Genomes                |                              | Percentage of Genomes Containing Cluster | Chi-squared test | Fisher's exact test |
|-------------------------------|------------------------------|------------------------------------------|------------------|---------------------|
| Present (≥0.9) <sup>a,b</sup> | Absent (<0.9) <sup>a,b</sup> |                                          |                  |                     |



| Cluster ID     | NSI | AI | NSI | AI | % NSI | % AI | Greater % | statistic | p-value | p-value | Gene ID     | Predicted Protein Function                                                  |
|----------------|-----|----|-----|----|-------|------|-----------|-----------|---------|---------|-------------|-----------------------------------------------------------------------------|
| Cluster_103416 | 13  | 5  | 10  | 18 | 57    | 22   | NSI       | 4.47      | 0.0345  | 0.0331  |             | conserved hypothetical protein                                              |
| Cluster_108598 | 13  | 5  | 10  | 18 | 57    | 22   | NSI       | 4.47      | 0.0345  | 0.0331  |             | DNA-packaging protein FI                                                    |
| Cluster_108599 | 21  | 14 | 2   | 9  | 91    | 61   | NSI       | 4.30      | 0.0381  | 0.0351  |             | tail attachment protein                                                     |
| Cluster_109753 | 8   | 16 | 15  | 7  | 35    | 70   | AI        | 4.27      | 0.0388  | 0.0377  |             | outer membrane transport family protein                                     |
| Cluster_11588  | 1   | 8  | 22  | 15 | 4     | 35   | AI        | 4.97      | 0.0257  | 0.0220  |             | conserved hypothetical protein                                              |
| Cluster_12327  | 5   | 13 | 18  | 10 | 22    | 57   | AI        | 4.47      | 0.0345  | 0.0331  |             | putative prophage protein                                                   |
| Cluster_127817 | 23  | 17 | 0   | 6  | 100   | 74   | NSI       | 4.79      | 0.0286  | 0.0216  | <i>repA</i> | incFII family plasmid replication initiator RepA                            |
| Cluster_128486 | 11  | 3  | 12  | 20 | 48    | 13   | NSI       | 5.03      | 0.0249  | 0.0230  |             | phage antitermination Q family protein                                      |
| Cluster_128567 | 20  | 13 | 3   | 10 | 87    | 57   | NSI       | 3.86      | 0.0494  | 0.0472  |             | phage portal protein, lambda family                                         |
| Cluster_137907 | 4   | 12 | 19  | 11 | 17    | 52   | AI        | 4.70      | 0.0302  | 0.0287  |             | hypothetical protein                                                        |
| Cluster_138051 | 18  | 7  | 5   | 16 | 78    | 30   | NSI       | 8.76      | 0.0031  | 0.0027  |             | lysis S family protein                                                      |
| Cluster_147010 | 1   | 7  | 22  | 16 | 4     | 30   | AI        | 3.78      | 0.0518  | 0.0470  |             | MULE transposase domain protein                                             |
| Cluster_147011 | 1   | 7  | 22  | 16 | 4     | 30   | AI        | 3.78      | 0.0518  | 0.0470  |             | conserved hypothetical protein                                              |
| Cluster_147543 | 6   | 0  | 17  | 23 | 26    | 0    | NSI       | 4.79      | 0.0286  | 0.0216  |             | putative yfdA                                                               |
| Cluster_147907 | 1   | 7  | 22  | 16 | 4     | 30   | AI        | 3.78      | 0.0518  | 0.0470  |             | HNH endonuclease family protein                                             |
| Cluster_152550 | 10  | 2  | 13  | 21 | 43    | 9    | NSI       | 5.52      | 0.0188  | 0.0165  |             | mbeD/MobD like family protein                                               |
| Cluster_153717 | 3   | 10 | 20  | 13 | 13    | 43   | AI        | 3.86      | 0.0494  | 0.0472  | <i>rfaY</i> | lipopolysaccharide core heptose(II) kinase RfaY                             |
| Cluster_153719 | 2   | 10 | 21  | 13 | 9     | 43   | AI        | 5.52      | 0.0188  | 0.0165  |             | glycosyl transferase 8 family protein                                       |
| Cluster_165317 | 14  | 6  | 9   | 17 | 61    | 26   | NSI       | 4.33      | 0.0373  | 0.0361  |             | conserved hypothetical protein                                              |
| Cluster_169965 | 5   | 13 | 18  | 10 | 22    | 57   | AI        | 4.47      | 0.0345  | 0.0331  |             | ogr/Delta-like zinc finger family protein                                   |
| Cluster_173601 | 21  | 14 | 2   | 9  | 91    | 61   | NSI       | 4.30      | 0.0381  | 0.0351  | <i>folP</i> | dihydropterate synthase                                                     |
| Cluster_173657 | 0   | 5  | 23  | 18 | 0     | 22   | AI        | 3.59      | 0.0581  | 0.0491  |             | conserved hypothetical protein                                              |
| Cluster_178274 | 23  | 17 | 0   | 6  | 100   | 74   | NSI       | 4.79      | 0.0286  | 0.0216  |             | conserved hypothetical protein                                              |
| Cluster_17854  | 8   | 1  | 15  | 22 | 35    | 4    | NSI       | 4.97      | 0.0257  | 0.0220  |             | conserved hypothetical protein                                              |
| Cluster_183342 | 7   | 17 | 16  | 6  | 30    | 74   | AI        | 7.06      | 0.0079  | 0.0072  |             | hypothetical protein                                                        |
| Cluster_185869 | 1   | 7  | 22  | 16 | 4     | 30   | AI        | 3.78      | 0.0518  | 0.0470  |             | transposase family protein                                                  |
| Cluster_188375 | 19  | 10 | 4   | 13 | 83    | 43   | NSI       | 5.97      | 0.0145  | 0.0134  |             | phage major capsid E family protein                                         |
| Cluster_191931 | 0   | 5  | 23  | 18 | 0     | 22   | AI        | 3.59      | 0.0581  | 0.0491  |             | lysR substrate binding domain protein                                       |
| Cluster_191933 | 0   | 5  | 23  | 18 | 0     | 22   | AI        | 3.59      | 0.0581  | 0.0491  |             | 3-oxoacid CoA-transferase, B subunit                                        |
| Cluster_191934 | 0   | 5  | 23  | 18 | 0     | 22   | AI        | 3.59      | 0.0581  | 0.0491  |             | acetyl-CoA C-acetyltransferase family protein                               |
| Cluster_191935 | 0   | 5  | 23  | 18 | 0     | 22   | AI        | 3.59      | 0.0581  | 0.0491  |             | 3-hydroxyacyl-CoA dehydrogenase, NAD binding domain protein                 |
| Cluster_193295 | 11  | 19 | 12  | 4  | 48    | 83   | AI        | 4.70      | 0.0302  | 0.0287  |             | putative membrane protein                                                   |
| Cluster_198519 | 2   | 9  | 21  | 14 | 9     | 39   | AI        | 4.30      | 0.0381  | 0.0351  |             | transposase family protein                                                  |
| Cluster_200453 | 5   | 13 | 18  | 10 | 22    | 57   | AI        | 4.47      | 0.0345  | 0.0331  |             | putative derpression protein                                                |
| Cluster_20103  | 14  | 6  | 9   | 17 | 61    | 26   | NSI       | 4.33      | 0.0373  | 0.0361  |             | outer membrane transport family protein                                     |
| Cluster_203385 | 3   | 12 | 20  | 11 | 13    | 52   | AI        | 6.33      | 0.0119  | 0.0106  |             | conserved hypothetical family protein                                       |
| Cluster_2127   | 0   | 5  | 23  | 18 | 0     | 22   | AI        | 3.59      | 0.0581  | 0.0491  |             | 3-hydroxybutyrate dehydrogenase family protein                              |
| Cluster_221391 | 9   | 2  | 14  | 21 | 39    | 9    | NSI       | 4.30      | 0.0381  | 0.0351  |             | conserved hypothetical protein                                              |
| Cluster_225286 | 1   | 8  | 22  | 15 | 4     | 35   | AI        | 4.97      | 0.0257  | 0.0220  |             | RHS Repeat family protein                                                   |
| Cluster_227577 | 2   | 9  | 21  | 14 | 9     | 39   | AI        | 4.30      | 0.0381  | 0.0351  | <i>ssb</i>  | single-stranded DNA-binding protein                                         |
| Cluster_230986 | 0   | 6  | 23  | 17 | 0     | 26   | AI        | 4.79      | 0.0286  | 0.0216  | <i>rfaA</i> | glucose-1-phosphate thymidyltransferase                                     |
| Cluster_232396 | 3   | 11 | 20  | 12 | 13    | 48   | AI        | 5.03      | 0.0249  | 0.0230  |             | putative dNA-binding helix-turn-helix protein                               |
| Cluster_234924 | 23  | 18 | 0   | 5  | 100   | 78   | NSI       | 3.59      | 0.0581  | 0.0491  |             | orn/Lys/Arg decarboxylase, C-terminal domain protein                        |
| Cluster_237554 | 7   | 0  | 16  | 23 | 30    | 0    | NSI       | 6.07      | 0.0138  | 0.0092  |             | conserved hypothetical protein                                              |
| Cluster_237572 | 21  | 14 | 2   | 9  | 91    | 61   | NSI       | 4.30      | 0.0381  | 0.0351  |             | head decoration protein                                                     |
| Cluster_24422  | 3   | 10 | 20  | 13 | 13    | 43   | AI        | 3.86      | 0.0494  | 0.0472  |             | conserved hypothetical protein                                              |
| Cluster_247805 | 23  | 18 | 0   | 5  | 100   | 78   | NSI       | 3.59      | 0.0581  | 0.0491  |             | glucosamine-6-phosphate isomerases/6-phosphogluconolactonase family protein |
| Cluster_248097 | 12  | 4  | 11  | 19 | 52    | 17   | NSI       | 4.70      | 0.0302  | 0.0287  |             | conserved hypothetical protein                                              |
| Cluster_248119 | 13  | 5  | 10  | 18 | 57    | 22   | NSI       | 4.47      | 0.0345  | 0.0331  |             | dnaB-like helicase N terminal domain protein                                |
| Cluster_253514 | 23  | 17 | 0   | 6  | 100   | 74   | NSI       | 4.79      | 0.0286  | 0.0216  | <i>wcaF</i> | colanic acid biosynthesis acetyltransferase WcaF                            |
| Cluster_261591 | 15  | 7  | 8   | 16 | 65    | 30   | NSI       | 4.27      | 0.0388  | 0.0377  |             | methyltransferase domain protein                                            |
| Cluster_262069 | 9   | 2  | 14  | 21 | 39    | 9    | NSI       | 4.30      | 0.0381  | 0.0351  |             | istB-like ATP binding family protein                                        |
| Cluster_266373 | 18  | 7  | 5   | 16 | 78    | 30   | NSI       | 8.76      | 0.0031  | 0.0027  |             | lysis S family protein                                                      |
| Cluster_267342 | 13  | 5  | 10  | 18 | 57    | 22   | NSI       | 4.47      | 0.0345  | 0.0331  |             | putative bacteriophage protein                                              |
| Cluster_271578 | 5   | 13 | 18  | 10 | 22    | 57   | AI        | 4.47      | 0.0345  | 0.0331  |             | conserved hypothetical protein                                              |
| Cluster_275878 | 19  | 10 | 4   | 13 | 83    | 43   | NSI       | 5.97      | 0.0145  | 0.0134  |             | lysR substrate binding domain protein                                       |
| Cluster_281680 | 11  | 3  | 12  | 20 | 48    | 13   | NSI       | 5.03      | 0.0249  | 0.0230  |             | phage antitermination Q family protein                                      |
| Cluster_289981 | 9   | 2  | 14  | 21 | 39    | 9    | NSI       | 4.30      | 0.0381  | 0.0351  |             | integrase core domain protein                                               |
| Cluster_291605 | 7   | 1  | 16  | 22 | 30    | 4    | NSI       | 3.78      | 0.0518  | 0.0470  |             | putative upf87.6                                                            |
| Cluster_294187 | 22  | 14 | 1   | 9  | 96    | 61   | NSI       | 6.26      | 0.0123  | 0.0098  |             | conserved hypothetical protein                                              |
| Cluster_29592  | 10  | 18 | 13  | 5  | 43    | 78   | AI        | 4.47      | 0.0345  | 0.0331  |             | conserved hypothetical protein                                              |
| Cluster_296966 | 0   | 5  | 23  | 18 | 0     | 22   | AI        | 3.59      | 0.0581  | 0.0491  |             | conserved hypothetical protein                                              |
| Cluster_297448 | 7   | 19 | 16  | 4  | 30    | 83   | AI        | 10.70     | 0.0011  | 0.0008  |             | conserved hypothetical protein                                              |
| Cluster_302692 | 13  | 5  | 10  | 18 | 57    | 22   | NSI       | 4.47      | 0.0345  | 0.0331  |             | hypothetical protein                                                        |
| Cluster_302972 | 22  | 16 | 1   | 7  | 96    | 70   | NSI       | 3.78      | 0.0518  | 0.0470  |             | DNA methylase family protein                                                |
| Cluster_307827 | 10  | 2  | 13  | 21 | 43    | 9    | NSI       | 5.52      | 0.0188  | 0.0165  | <i>mbeC</i> | mobilization protein MbeC                                                   |
| Cluster_307965 | 13  | 3  | 10  | 20 | 57    | 13   | NSI       | 7.76      | 0.0053  | 0.0045  |             | trp family protein                                                          |
| Cluster_310837 | 0   | 5  | 23  | 18 | 0     | 22   | AI        | 3.59      | 0.0581  | 0.0491  | <i>kilR</i> | killing protein KilR                                                        |
| Cluster_316814 | 1   | 7  | 22  | 16 | 4     | 30   | AI        | 3.78      | 0.0518  | 0.0470  |             | AAA domain protein                                                          |
| Cluster_318890 | 0   | 5  | 23  | 18 | 0     | 22   | AI        | 3.59      | 0.0581  | 0.0491  |             | nucleoside transporter family protein                                       |
| Cluster_318894 | 0   | 5  | 23  | 18 | 0     | 22   | AI        | 3.59      | 0.0581  | 0.0491  |             | lysR substrate binding domain protein                                       |
| Cluster_31976  | 3   | 10 | 20  | 13 | 13    | 43   | AI        | 3.86      | 0.0494  | 0.0472  | <i>rfaY</i> | lipopolysaccharide core heptose(II) kinase RfaY                             |
| Cluster_322029 | 15  | 7  | 8   | 16 | 65    | 30   | NSI       | 4.27      | 0.0388  | 0.0377  |             | hypothetical protein                                                        |
| Cluster_322922 | 12  | 4  | 11  | 19 | 52    | 17   | NSI       | 4.70      | 0.0302  | 0.0287  |             | lysis S family protein                                                      |
| Cluster_324271 | 0   | 6  | 23  | 17 | 0     | 26   | AI        | 4.79      | 0.0286  | 0.0216  | <i>ssbF</i> | plasmid-derived single-stranded DNA-binding protein                         |
| Cluster_325003 | 8   | 18 | 15  | 5  | 35    | 78   | AI        | 7.17      | 0.0074  | 0.0067  |             | conserved hypothetical protein                                              |
| Cluster_326414 | 0   | 6  | 23  | 17 | 0     | 26   | AI        | 4.79      | 0.0286  | 0.0216  |             | dinI-like family protein                                                    |
| Cluster_327168 | 15  | 7  | 8   | 16 | 65    | 30   | NSI       | 4.27      | 0.0388  | 0.0377  |             | helix-turn-helix domain protein                                             |
| Cluster_332075 | 10  | 3  | 13  | 20 | 43    | 13   | NSI       | 3.86      | 0.0494  | 0.0472  | <i>espN</i> | putative t3SS effector protein EspN2-2                                      |
| Cluster_337590 | 12  | 3  | 11  | 20 | 52    | 13   | NSI       | 6.33      | 0.0119  | 0.0106  | <i>rop</i>  | regulatory protein rop                                                      |
| Cluster_34074  | 18  | 7  | 5   | 16 | 78    | 30   | NSI       | 8.76      | 0.0031  | 0.0027  |             | lysis S family protein                                                      |
| Cluster_34159  | 12  | 2  | 11  | 21 | 52    | 9    | NSI       | 8.32      | 0.0039  | 0.0031  |             | conserved hypothetical protein                                              |
| Cluster_341964 | 9   | 17 | 14  | 6  | 39    | 74   | AI        | 4.33      | 0.0373  | 0.0361  |             | putative exonuclease VIII                                                   |
| Cluster_34197  | 14  | 6  | 9   | 17 | 61    | 26   | NSI       | 4.33      | 0.0373  | 0.0361  |             | HTH-like domain protein                                                     |
| Cluster_342342 | 13  | 5  | 10  | 18 | 57    | 22   | NSI       | 4.47      | 0.0345  | 0.0331  |             | conserved hypothetical protein                                              |
| Cluster_342343 | 13  | 5  | 10  | 18 | 57    | 22   | NSI       | 4.47      | 0.0345  | 0.0331  |             | conserved hypothetical protein                                              |
| Cluster_342345 | 13  | 4  | 10  | 19 | 57    | 17   | NSI       | 5.97      | 0.0145  | 0.0134  |             | conserved hypothetical protein                                              |
| Cluster_40177  | 20  | 13 | 3   | 10 | 87    | 57   | NSI       | 3.86      | 0.0494  | 0.0472  |             | major tail V domain protein                                                 |
| Cluster_4527   | 21  | 13 | 2   | 10 | 91    | 57   | NSI       | 5.52      | 0.0188  | 0.0165  |             | tail attachment protein                                                     |
| Cluster_46843  | 13  | 5  | 10  | 18 | 57    | 22   | NSI       | 4.47      | 0.0345  | 0.0331  |             | dnaB-like helicase N terminal domain protein                                |
| Cluster_46983  | 15  | 7  | 8   | 16 | 65    | 30   | NSI       | 4.27      | 0.0388  | 0.0377  |             | conserved hypothetical protein                                              |
| Cluster_4778   | 3   | 11 | 20  | 12 | 13    | 48   | AI        | 5.03      | 0.0249  | 0.0230  |             | conserved hypothetical protein                                              |
| Cluster_4832   | 17  | 8  | 6   | 15 | 74    | 35   | NSI       | 5.61      | 0.0179  | 0.0169  |             | DNA methylase family protein                                                |
| Cluster_49147  | 6   | 0  | 17  | 23 | 26    | 0    | NSI       | 4.79      | 0.0286  | 0.0216  |             | putative phage protein                                                      |
| Cluster_49492  | 0   | 5  | 23  | 18 | 0     | 22   | AI        | 3.59      | 0.0581  | 0.0491  |             | acetyltransferase family protein                                            |
| Cluster_50317  | 0   | 5  | 23  | 18 | 0     | 22   | AI        | 3.59      | 0.0581  | 0.0491  |             | conserved hypothetical protein                                              |
| Cluster_51720  | 0   | 5  | 23  | 18 | 0     | 22   | AI        | 3.59      | 0.0581  | 0.0491  |             | 3-oxoacid CoA-transferase, A subunit                                        |
| Cluster_51724  | 0   | 5  | 23  | 18 | 0     | 22   | AI        | 3.59      | 0.0581  | 0.0491  |             | citrate transporter family protein                                          |

|               |    |    |    |    |    |    |     |      |        |        |             |                                                     |
|---------------|----|----|----|----|----|----|-----|------|--------|--------|-------------|-----------------------------------------------------|
| Cluster_55403 | 5  | 13 | 18 | 10 | 22 | 57 | AI  | 4.47 | 0.0345 | 0.0331 |             | helix-turn-helix domain protein                     |
| Cluster_57003 | 5  | 13 | 18 | 10 | 22 | 57 | AI  | 4.47 | 0.0345 | 0.0331 |             | putative phage immunity repressor protein           |
| Cluster_59342 | 7  | 1  | 16 | 22 | 30 | 4  | NSI | 3.78 | 0.0518 | 0.0470 |             | conserved hypothetical protein                      |
| Cluster_59365 | 3  | 10 | 20 | 13 | 13 | 43 | AI  | 3.86 | 0.0494 | 0.0472 |             | phage antitermination Q family protein              |
| Cluster_59689 | 10 | 3  | 13 | 20 | 43 | 13 | NSI | 3.86 | 0.0494 | 0.0472 |             | putative incFII replication protein RepA3           |
| Cluster_64612 | 12 | 3  | 11 | 20 | 52 | 13 | NSI | 6.33 | 0.0119 | 0.0106 | <i>rop</i>  | regulatory protein rop                              |
| Cluster_68405 | 9  | 18 | 14 | 5  | 39 | 78 | AI  | 5.74 | 0.0166 | 0.0156 | <i>fimA</i> | type-1 fimbrial protein, A chain                    |
| Cluster_70068 | 14 | 5  | 9  | 18 | 61 | 22 | NSI | 5.74 | 0.0166 | 0.0156 |             | conserved hypothetical protein                      |
| Cluster_7049  | 0  | 5  | 23 | 18 | 0  | 22 | AI  | 3.59 | 0.0581 | 0.0491 |             | conserved hypothetical protein                      |
| Cluster_73925 | 9  | 2  | 14 | 21 | 39 | 9  | NSI | 4.30 | 0.0381 | 0.0351 | <i>mbeA</i> | DNA relaxase MbeA                                   |
| Cluster_74390 | 11 | 2  | 12 | 21 | 48 | 9  | NSI | 6.86 | 0.0088 | 0.0074 |             | hypothetical protein                                |
| Cluster_78687 | 20 | 13 | 3  | 10 | 87 | 57 | NSI | 3.86 | 0.0494 | 0.0472 |             | minor tail protein U                                |
| Cluster_79228 | 0  | 5  | 23 | 18 | 0  | 22 | AI  | 3.59 | 0.0581 | 0.0491 |             | conserved hypothetical protein                      |
| Cluster_7938  | 20 | 12 | 3  | 11 | 87 | 52 | NSI | 5.03 | 0.0249 | 0.0230 |             | DNA methylase family protein                        |
| Cluster_82579 | 6  | 17 | 17 | 6  | 26 | 74 | AI  | 8.70 | 0.0032 | 0.0028 | <i>espJ</i> | putative non-LEE-encoded effector EspJ              |
| Cluster_83701 | 0  | 5  | 23 | 18 | 0  | 22 | AI  | 3.59 | 0.0581 | 0.0491 |             | trp family protein                                  |
| Cluster_88571 | 16 | 7  | 7  | 16 | 70 | 30 | NSI | 5.57 | 0.0183 | 0.0174 | <i>cro</i>  | regulatory protein cro                              |
| Cluster_8918  | 1  | 7  | 22 | 16 | 4  | 30 | AI  | 3.78 | 0.0518 | 0.0470 | <i>ssbF</i> | plasmid-derived single-stranded DNA-binding protein |
| Cluster_902   | 8  | 16 | 15 | 7  | 35 | 70 | AI  | 4.27 | 0.0388 | 0.0377 |             | outer membrane transport family protein             |
| Cluster_94384 | 22 | 16 | 1  | 7  | 96 | 70 | NSI | 3.78 | 0.0518 | 0.0470 |             | transposase, Mutator family protein                 |

<sup>a</sup>Genes were grouped into gene clusters using a "stringent" clustering threshold of ≥90% nucleotide identity.

<sup>b</sup>Gene clusters identified as "present" have a TBLASTN LS-BSR ≥0.9, while those that are "absent" have a TBLASTN LS-BSR <0.9.

<sup>c</sup>Clinical outcomes are classified as lethal (L), non-lethal symptomatic (NSI), and asymptomatic (AI).

**Table S3.** Genes identified by LS-BSR that are significantly correlated with LI, NSI, or AI clinical outcomes for the 61 typical EPEC genomes analyzed using a stringent gene clustering threshold

| Lethal (LI) vs. Non-lethal Symptomatic (NSI) |                                       |                                   |    |                                          |       |           |                  |         |                     |         |                                                                                      |
|----------------------------------------------|---------------------------------------|-----------------------------------|----|------------------------------------------|-------|-----------|------------------|---------|---------------------|---------|--------------------------------------------------------------------------------------|
| Cluster ID                                   | No. of Genomes                        |                                   |    | Percentage of Genomes Containing Cluster |       |           | Chi-squared test |         | Fisher's exact test | Gene ID | Predicted Protein Function                                                           |
|                                              | Present ( $\geq 0.9$ ) <sup>a,b</sup> | Absent ( $< 0.9$ ) <sup>a,b</sup> |    | % LI                                     | % NSI | Greater % | statistic        | p-value | p-value             |         |                                                                                      |
| Cluster_121796                               | 0                                     | 4                                 | 24 | 16                                       | 0     | 20        | NSI              | 3.14    | 0.0765              | 0.0357  | caudovirales tail fibre assembly family protein                                      |
| Cluster_123776                               | 0                                     | 5                                 | 24 | 15                                       | 0     | 25        | NSI              | 4.51    | 0.0336              | 0.0143  | conserved hypothetical protein                                                       |
| Cluster_137178                               | 4                                     | 11                                | 20 | 9                                        | 17    | 55        | NSI              | 5.53    | 0.0187              | 0.0112  | hypothetical protein                                                                 |
| Cluster_140609                               | 2                                     | 8                                 | 22 | 12                                       | 8     | 40        | NSI              | 4.56    | 0.0328              | 0.0270  | conserved hypothetical protein                                                       |
| Cluster_163539                               | 0                                     | 4                                 | 24 | 16                                       | 0     | 20        | NSI              | 3.14    | 0.0765              | 0.0357  | hypothetical protein                                                                 |
| Cluster_168638                               | 9                                     | 2                                 | 15 | 18                                       | 38    | 10        | LI               | 3.06    | 0.0805              | 0.0445  | putative tniA transposase domain protein                                             |
| Cluster_175605                               | 6                                     | 0                                 | 18 | 20                                       | 25    | 0         | LI               | 3.86    | 0.0494              | 0.0246  | glucose-1-phosphate thymidyltransferase                                              |
| Cluster_196644                               | 17                                    | 20                                | 7  | 0                                        | 71    | 100       | NSI              | 4.93    | 0.0264              | 0.0111  | hscA fe-S protein assembly chaperone HscA                                            |
| Cluster_208031                               | 18                                    | 20                                | 6  | 0                                        | 75    | 100       | NSI              | 3.86    | 0.0494              | 0.0246  | substrate binding domain of ABC-type glycine betaine transport system family protein |
| Cluster_21640                                | 18                                    | 20                                | 6  | 0                                        | 75    | 100       | NSI              | 3.86    | 0.0494              | 0.0246  | PTS system, N-acetylglucosamine-specific IIBC component                              |
| Cluster_216712                               | 1                                     | 6                                 | 23 | 14                                       | 4     | 30        | NSI              | 3.68    | 0.0550              | 0.0353  | putative membrane protein                                                            |
| Cluster_217459                               | 0                                     | 5                                 | 24 | 15                                       | 0     | 25        | NSI              | 4.51    | 0.0336              | 0.0143  | HTH domain protein                                                                   |
| Cluster_24348                                | 5                                     | 12                                | 19 | 8                                        | 21    | 60        | NSI              | 5.50    | 0.0190              | 0.0128  | phage tail tape measure protein, lambda family                                       |
| Cluster_245108                               | 18                                    | 20                                | 6  | 0                                        | 75    | 100       | NSI              | 3.86    | 0.0494              | 0.0246  | electron transport complex, RnfABCDGE type, B subunit                                |
| Cluster_247837                               | 6                                     | 0                                 | 18 | 20                                       | 25    | 0         | LI               | 3.86    | 0.0494              | 0.0246  | putative domain protein                                                              |
| Cluster_257914                               | 24                                    | 16                                | 0  | 4                                        | 100   | 80        | LI               | 3.14    | 0.0765              | 0.0357  | transcriptional activator CadC                                                       |
| Cluster_265225                               | 18                                    | 20                                | 6  | 0                                        | 75    | 100       | NSI              | 3.86    | 0.0494              | 0.0246  | PRD domain protein                                                                   |
| Cluster_274418                               | 4                                     | 10                                | 20 | 10                                       | 17    | 50        | NSI              | 4.16    | 0.0415              | 0.0253  | mu-like prophage FluMu gp41 family protein                                           |
| Cluster_280171                               | 18                                    | 20                                | 6  | 0                                        | 75    | 100       | NSI              | 3.86    | 0.0494              | 0.0246  | tatD tat-linked quality control protein TatD                                         |
| Cluster_282502                               | 18                                    | 20                                | 6  | 0                                        | 75    | 100       | NSI              | 3.86    | 0.0494              | 0.0246  | yphB aldose 1-epimerase                                                              |
| Cluster_283931                               | 24                                    | 16                                | 0  | 4                                        | 100   | 80        | LI               | 3.14    | 0.0765              | 0.0357  | pyridine nucleotide-disulfide oxidoreductase family protein                          |
| Cluster_290242                               | 18                                    | 20                                | 6  | 0                                        | 75    | 100       | NSI              | 3.86    | 0.0494              | 0.0246  | yphF ABC transporter periplasmic-binding protein YphF                                |
| Cluster_301785                               | 4                                     | 10                                | 20 | 10                                       | 17    | 50        | NSI              | 4.16    | 0.0415              | 0.0253  | phage tail tape measure protein, TP901 family, core region                           |
| Cluster_306818                               | 0                                     | 4                                 | 24 | 16                                       | 0     | 20        | NSI              | 3.14    | 0.0765              | 0.0357  | conserved hypothetical protein                                                       |
| Cluster_313761                               | 9                                     | 2                                 | 15 | 18                                       | 38    | 10        | LI               | 3.06    | 0.0805              | 0.0445  | HNH endonuclease family protein                                                      |
| Cluster_315801                               | 2                                     | 9                                 | 22 | 11                                       | 8     | 45        | NSI              | 5.99    | 0.0144              | 0.0121  | phage tail protein I                                                                 |
| Cluster_317131                               | 1                                     | 6                                 | 23 | 14                                       | 4     | 30        | NSI              | 3.68    | 0.0550              | 0.0353  | conserved hypothetical protein                                                       |
| Cluster_32291                                | 18                                    | 20                                | 6  | 0                                        | 75    | 100       | NSI              | 3.86    | 0.0494              | 0.0246  | dccD deoxycytidine triphosphate deaminase                                            |
| Cluster_324641                               | 18                                    | 20                                | 6  | 0                                        | 75    | 100       | NSI              | 3.86    | 0.0494              | 0.0246  | yphB aldose 1-epimerase                                                              |
| Cluster_332075                               | 4                                     | 10                                | 20 | 10                                       | 17    | 50        | NSI              | 4.16    | 0.0415              | 0.0253  | putative t3SS effector protein EspN2-2                                               |
| Cluster_346896                               | 2                                     | 8                                 | 22 | 12                                       | 8     | 40        | NSI              | 4.56    | 0.0328              | 0.0270  | phage tail tape measure protein, lambda family                                       |
| Cluster_46213                                | 3                                     | 10                                | 21 | 10                                       | 13    | 50        | NSI              | 5.68    | 0.0172              | 0.0092  | putative transmembrane protein                                                       |
| Cluster_4962                                 | 15                                    | 18                                | 9  | 2                                        | 63    | 90        | NSI              | 3.06    | 0.0805              | 0.0445  | conserved hypothetical protein                                                       |
| Cluster_64413                                | 0                                     | 4                                 | 24 | 16                                       | 0     | 20        | NSI              | 3.14    | 0.0765              | 0.0357  | phosphoadenosine phosphosulfate reductase family protein                             |
| Cluster_67345                                | 7                                     | 0                                 | 17 | 20                                       | 29    | 0         | LI               | 4.93    | 0.0264              | 0.0111  | conserved hypothetical protein                                                       |
| Cluster_81331                                | 18                                    | 20                                | 6  | 0                                        | 75    | 100       | NSI              | 3.86    | 0.0494              | 0.0246  | lppC lipofamily protein                                                              |
| Cluster_83927                                | 6                                     | 0                                 | 18 | 20                                       | 25    | 0         | LI               | 3.86    | 0.0494              | 0.0246  | fdtA dTDP-6-deoxy-3,4-keto-hexulose isomerase                                        |
| Cluster_83929                                | 6                                     | 0                                 | 18 | 20                                       | 25    | 0         | LI               | 3.86    | 0.0494              | 0.0246  | rfbB dTDP-glucose 4,6-dehydratase                                                    |
| Cluster_99077                                | 4                                     | 10                                | 20 | 10                                       | 17    | 50        | NSI              | 4.16    | 0.0415              | 0.0253  | cysteine protease, YopT-type domain protein                                          |

  

| Lethal (LI) vs. Asymptomatic (AI) |                                       |                                   |    |                                          |      |           |                  |         |                     |         |                                                                                |
|-----------------------------------|---------------------------------------|-----------------------------------|----|------------------------------------------|------|-----------|------------------|---------|---------------------|---------|--------------------------------------------------------------------------------|
| Cluster ID                        | No. of Genomes                        |                                   |    | Percentage of Genomes Containing Cluster |      |           | Chi-squared test |         | Fisher's exact test | Gene ID | Predicted Protein Function                                                     |
|                                   | Present ( $\geq 0.9$ ) <sup>a,b</sup> | Absent ( $< 0.9$ ) <sup>a,b</sup> |    | % LI                                     | % AI | Greater % | statistic        | p-value | p-value             |         |                                                                                |
| Cluster_102911                    | 2                                     | 6                                 | 22 | 11                                       | 8    | 35        | AI               | 3.05    | 0.0808              | 0.0486  | phage integrase family protein                                                 |
| Cluster_103685                    | 24                                    | 13                                | 0  | 4                                        | 100  | 76        | LI               | 3.87    | 0.0491              | 0.0235  | hypothetical protein                                                           |
| Cluster_10467                     | 17                                    | 6                                 | 7  | 11                                       | 71   | 35        | LI               | 3.76    | 0.0524              | 0.0308  | phage Terminase family protein                                                 |
| Cluster_108011                    | 13                                    | 2                                 | 11 | 15                                       | 54   | 12        | LI               | 5.99    | 0.0144              | 0.0082  | traN type-F conjugative transfer system mating-pair stabilization protein TraN |
| Cluster_108599                    | 22                                    | 11                                | 2  | 6                                        | 92   | 65        | LI               | 3.05    | 0.0808              | 0.0486  | tail attachment protein                                                        |
| Cluster_108754                    | 17                                    | 6                                 | 7  | 11                                       | 71   | 35        | LI               | 3.76    | 0.0524              | 0.0308  | phage terminase, small subunit, P27 family                                     |
| Cluster_109753                    | 9                                     | 13                                | 15 | 4                                        | 38   | 76        | AI               | 4.61    | 0.0318              | 0.0252  | outer membrane transport family protein                                        |
| Cluster_11079                     | 11                                    | 14                                | 13 | 3                                        | 46   | 82        | AI               | 4.15    | 0.0417              | 0.0251  | transglycosylase SLT domain protein                                            |
| Cluster_11588                     | 4                                     | 8                                 | 20 | 9                                        | 17   | 47        | AI               | 3.09    | 0.0786              | 0.0454  | conserved hypothetical protein                                                 |
| Cluster_12200                     | 7                                     | 11                                | 17 | 6                                        | 29   | 65        | AI               | 3.76    | 0.0524              | 0.0308  | glycosyltransferase Family 4 family protein                                    |
| Cluster_12327                     | 4                                     | 10                                | 20 | 7                                        | 17   | 59        | AI               | 6.10    | 0.0135              | 0.0079  | putative prophage protein                                                      |
| Cluster_125122                    | 7                                     | 0                                 | 17 | 17                                       | 29   | 0         | LI               | 4.10    | 0.0430              | 0.0295  | putative predicted protein                                                     |
| Cluster_127340                    | 16                                    | 4                                 | 8  | 13                                       | 67   | 24        | LI               | 5.79    | 0.0162              | 0.0109  | DDE_Tnp_1-associated family protein                                            |
| Cluster_128567                    | 22                                    | 10                                | 2  | 7                                        | 92   | 59        | LI               | 4.49    | 0.0340              | 0.0208  | phage portal protein, lambda family                                            |
| Cluster_131841                    | 18                                    | 17                                | 6  | 0                                        | 75   | 100       | AI               | 3.18    | 0.0746              | 0.0327  | fryC fructose-like permease IIC component 1                                    |
| Cluster_132559                    | 12                                    | 15                                | 12 | 2                                        | 50   | 88        | AI               | 4.88    | 0.0272              | 0.0183  | phoH-like family protein                                                       |
| Cluster_133256                    | 0                                     | 4                                 | 24 | 13                                       | 0    | 24        | AI               | 3.87    | 0.0491              | 0.0235  | conserved hypothetical protein                                                 |
| Cluster_133289                    | 23                                    | 11                                | 1  | 6                                        | 96   | 65        | LI               | 4.79    | 0.0286              | 0.0141  | bacterial Ig-like domain family protein                                        |
| Cluster_1339                      | 5                                     | 9                                 | 19 | 8                                        | 21   | 53        | AI               | 3.25    | 0.0716              | 0.0476  | bacteriophage replication gene A family protein                                |
| Cluster_138051                    | 17                                    | 4                                 | 7  | 13                                       | 71   | 24        | LI               | 7.12    | 0.0076              | 0.0044  | lysis S family protein                                                         |
| Cluster_142846                    | 7                                     | 0                                 | 17 | 17                                       | 29   | 0         | LI               | 4.10    | 0.0430              | 0.0295  | conserved hypothetical protein                                                 |
| Cluster_14417                     | 9                                     | 1                                 | 15 | 16                                       | 38   | 6         | LI               | 3.82    | 0.0508              | 0.0281  | putative predicted protein                                                     |
| Cluster_145816                    | 4                                     | 9                                 | 20 | 8                                        | 17   | 53        | AI               | 4.49    | 0.0341              | 0.0198  | putative glyco3, capsid size determination protein Sid                         |
| Cluster_14627                     | 5                                     | 11                                | 19 | 6                                        | 21   | 65        | AI               | 6.31    | 0.0120              | 0.0086  | cysteine protease, YopT-type domain protein                                    |
| Cluster_147263                    | 20                                    | 9                                 | 4  | 8                                        | 83   | 53        | LI               | 3.09    | 0.0786              | 0.0454  | methyltransferase domain protein                                               |
| Cluster_147543                    | 8                                     | 0                                 | 16 | 17                                       | 33   | 0         | LI               | 5.08    | 0.0242              | 0.0128  | putative yfdA                                                                  |
| Cluster_148358                    | 4                                     | 8                                 | 20 | 9                                        | 17   | 47        | AI               | 3.09    | 0.0786              | 0.0454  | putative exported protein                                                      |
| Cluster_14894                     | 11                                    | 2                                 | 13 | 15                                       | 46   | 12        | LI               | 3.88    | 0.0490              | 0.0391  | conserved hypothetical protein                                                 |
| Cluster_149480                    | 4                                     | 8                                 | 20 | 9                                        | 17   | 47        | AI               | 3.09    | 0.0786              | 0.0454  | conserved hypothetical protein                                                 |
| Cluster_14998                     | 17                                    | 4                                 | 7  | 13                                       | 71   | 24        | LI               | 7.12    | 0.0076              | 0.0044  | bacteriophage replication gene A family protein                                |
| Cluster_151023                    | 6                                     | 11                                | 18 | 6                                        | 25   | 65        | AI               | 4.93    | 0.0264              | 0.0230  | conserved hypothetical protein                                                 |
| Cluster_151647                    | 22                                    | 11                                | 2  | 6                                        | 92   | 65        | LI               | 3.05    | 0.0808              | 0.0486  | phage major capsid E family protein                                            |
| Cluster_152085                    | 6                                     | 0                                 | 18 | 17                                       | 25   | 0         | LI               | 3.18    | 0.0746              | 0.0327  | conserved hypothetical protein                                                 |
| Cluster_153041                    | 16                                    | 5                                 | 8  | 12                                       | 67   | 29        | LI               | 4.14    | 0.0419              | 0.0278  | conserved hypothetical protein                                                 |
| Cluster_153717                    | 5                                     | 10                                | 19 | 7                                        | 21   | 59        | AI               | 4.66    | 0.0309              | 0.0212  | rfaY lipopolysaccharide core heptose(II) kinase RfaY                           |
| Cluster_157040                    | 18                                    | 6                                 | 6  | 11                                       | 75   | 35        | LI               | 4.93    | 0.0264              | 0.0230  | methyltransferase domain protein                                               |
| Cluster_166190                    | 7                                     | 0                                 | 17 | 17                                       | 29   | 0         | LI               | 4.10    | 0.0430              | 0.0295  | phage integrase family protein                                                 |
| Cluster_168917                    | 0                                     | 4                                 | 24 | 13                                       | 0    | 24        | AI               | 3.87    | 0.0491              | 0.0235  | nucleoside 2-deoxyribosyltransferase family protein                            |
| Cluster_169965                    | 4                                     | 10                                | 20 | 7                                        | 17   | 59        | AI               | 6.10    | 0.0135              | 0.0079  | ogr/Delta-like zinc finger family protein                                      |
| Cluster_174674                    | 7                                     | 0                                 | 17 | 17                                       | 29   | 0         | LI               | 4.10    | 0.0430              | 0.0295  | conserved hypothetical protein                                                 |
| Cluster_175131                    | 6                                     | 0                                 | 18 | 17                                       | 25   | 0         | LI               | 3.18    | 0.0746              | 0.0327  | bacterial transferase hexapeptide family protein                               |
| Cluster_175605                    | 6                                     | 0                                 | 18 | 17                                       | 25   | 0         | LI               | 3.18    | 0.0746              | 0.0327  | rfbA glucose-1-phosphate thymidyltransferase                                   |
| Cluster_175612                    | 6                                     | 0                                 | 18 | 17                                       | 25   | 0         | LI               | 3.18    | 0.0746              | 0.0327  | transposase DDE domain protein                                                 |
| Cluster_175618                    | 6                                     | 0                                 | 18 | 17                                       | 25   | 0         | LI               | 3.18    | 0.0746              | 0.0327  | polysaccharide biosynthesis/export family protein                              |
| Cluster_176078                    | 6                                     | 0                                 | 18 | 17                                       | 25   | 0         | LI               | 3.18    | 0.0746              | 0.0327  | outer membrane autotransporter barrel domain protein                           |
| Cluster_176094                    | 6                                     | 0                                 | 18 | 17                                       | 25   | 0         | LI               | 3.18    | 0.0746              | 0.0327  | NIF3 family protein                                                            |

|                |    |    |    |    |     |     |    |      |        |        |              |                                                                                    |
|----------------|----|----|----|----|-----|-----|----|------|--------|--------|--------------|------------------------------------------------------------------------------------|
| Cluster_176531 | 6  | 0  | 18 | 17 | 25  | 0   | LI | 3.18 | 0.0746 | 0.0327 |              | hypothetical protein                                                               |
| Cluster_176970 | 6  | 0  | 18 | 17 | 25  | 0   | LI | 3.18 | 0.0746 | 0.0327 |              | conserved hypothetical protein                                                     |
| Cluster_177334 | 6  | 0  | 18 | 17 | 25  | 0   | LI | 3.18 | 0.0746 | 0.0327 |              | conserved hypothetical protein                                                     |
| Cluster_177488 | 6  | 0  | 18 | 17 | 25  | 0   | LI | 3.18 | 0.0746 | 0.0327 | <i>fliC</i>  | flagellin                                                                          |
| Cluster_178120 | 6  | 0  | 18 | 17 | 25  | 0   | LI | 3.18 | 0.0746 | 0.0327 |              | conserved hypothetical protein                                                     |
| Cluster_178144 | 6  | 0  | 18 | 17 | 25  | 0   | LI | 3.18 | 0.0746 | 0.0327 |              | putative dsORF-h1                                                                  |
| Cluster_178244 | 6  | 0  | 18 | 17 | 25  | 0   | LI | 3.18 | 0.0746 | 0.0327 |              | conserved hypothetical protein                                                     |
| Cluster_178274 | 23 | 11 | 1  | 6  | 96  | 65  | LI | 4.79 | 0.0286 | 0.0141 |              | conserved hypothetical protein                                                     |
| Cluster_178488 | 12 | 2  | 12 | 15 | 50  | 12  | LI | 4.88 | 0.0272 | 0.0183 | <i>nleE</i>  | putative nleE                                                                      |
| Cluster_178542 | 8  | 0  | 16 | 17 | 33  | 0   | LI | 5.08 | 0.0242 | 0.0128 | <i>epaR</i>  | type III secretion apparatus protein SpaR/YscT/HrcT                                |
| Cluster_178543 | 9  | 1  | 15 | 16 | 38  | 6   | LI | 3.82 | 0.0508 | 0.0281 |              | type III secretion , HrpO family protein                                           |
| Cluster_180437 | 9  | 1  | 15 | 16 | 38  | 6   | LI | 3.82 | 0.0508 | 0.0281 |              | putative transposase                                                               |
| Cluster_181608 | 20 | 9  | 4  | 8  | 83  | 53  | LI | 3.09 | 0.0786 | 0.0454 |              | transposase family protein                                                         |
| Cluster_182662 | 8  | 0  | 16 | 17 | 33  | 0   | LI | 5.08 | 0.0242 | 0.0128 |              | putative membrane protein                                                          |
| Cluster_183172 | 6  | 0  | 18 | 17 | 25  | 0   | LI | 3.18 | 0.0746 | 0.0327 |              | DDE domain protein                                                                 |
| Cluster_183173 | 6  | 0  | 18 | 17 | 25  | 0   | LI | 3.18 | 0.0746 | 0.0327 |              | transposase family protein                                                         |
| Cluster_183278 | 6  | 0  | 18 | 17 | 25  | 0   | LI | 3.18 | 0.0746 | 0.0327 |              | caudovirales tail fibre assembly family protein                                    |
| Cluster_185869 | 1  | 7  | 23 | 10 | 4   | 41  | AI | 6.48 | 0.0109 | 0.0051 |              | transposase family protein                                                         |
| Cluster_18601  | 15 | 16 | 9  | 1  | 63  | 94  | AI | 3.82 | 0.0508 | 0.0281 |              | ribbon-helix-helix , copG family protein                                           |
| Cluster_187872 | 2  | 6  | 22 | 11 | 8   | 35  | AI | 3.05 | 0.0808 | 0.0486 |              | conserved hypothetical protein                                                     |
| Cluster_18923  | 7  | 11 | 17 | 6  | 29  | 65  | AI | 3.76 | 0.0524 | 0.0308 |              | glycosyltransferase Family 4 family protein                                        |
| Cluster_196644 | 17 | 17 | 7  | 0  | 71  | 100 | AI | 4.10 | 0.0430 | 0.0295 | <i>hscA</i>  | fe-S protein assembly chaperone HscA                                               |
| Cluster_197463 | 15 | 16 | 9  | 1  | 63  | 94  | AI | 3.82 | 0.0508 | 0.0281 | <i>hipA</i>  | serine/threonine-protein kinase HipA                                               |
| Cluster_198519 | 4  | 9  | 20 | 8  | 17  | 53  | AI | 4.49 | 0.0341 | 0.0198 |              | transposase family protein                                                         |
| Cluster_200453 | 4  | 10 | 20 | 7  | 17  | 59  | AI | 6.10 | 0.0135 | 0.0079 |              | putative derepression protein                                                      |
| Cluster_20103  | 15 | 4  | 9  | 13 | 63  | 24  | LI | 4.61 | 0.0318 | 0.0252 |              | outer membrane transport family protein                                            |
| Cluster_201168 | 18 | 17 | 6  | 0  | 75  | 100 | AI | 3.18 | 0.0746 | 0.0327 | <i>eutK</i>  | ethanolamine utilization protein EutK                                              |
| Cluster_201403 | 9  | 1  | 15 | 16 | 38  | 6   | LI | 3.82 | 0.0508 | 0.0281 |              | conserved hypothetical protein                                                     |
| Cluster_201731 | 10 | 1  | 14 | 16 | 42  | 6   | LI | 4.80 | 0.0285 | 0.0136 |              | helix-turn-helix, Pqs domain protein                                               |
| Cluster_201738 | 10 | 1  | 14 | 16 | 42  | 6   | LI | 4.80 | 0.0285 | 0.0136 |              | conserved hypothetical protein                                                     |
| Cluster_207867 | 7  | 12 | 17 | 5  | 29  | 71  | AI | 5.30 | 0.0213 | 0.0124 |              | putative invasin                                                                   |
| Cluster_208660 | 18 | 17 | 6  | 0  | 75  | 100 | AI | 3.18 | 0.0746 | 0.0327 | <i>dnaX</i>  | DNA polymerase III, subunit gamma and tau                                          |
| Cluster_209025 | 9  | 1  | 15 | 16 | 38  | 6   | LI | 3.82 | 0.0508 | 0.0281 |              | putative epaO1 protein                                                             |
| Cluster_209146 | 9  | 1  | 15 | 16 | 38  | 6   | LI | 3.82 | 0.0508 | 0.0281 |              | shET2 enterotoxin, N-terminal region family protein                                |
| Cluster_210354 | 6  | 0  | 18 | 17 | 25  | 0   | LI | 3.18 | 0.0746 | 0.0327 |              | conserved hypothetical protein                                                     |
| Cluster_211131 | 9  | 1  | 15 | 16 | 38  | 6   | LI | 3.82 | 0.0508 | 0.0281 |              | insA N-terminal domain protein                                                     |
| Cluster_21153  | 6  | 0  | 18 | 17 | 25  | 0   | LI | 3.18 | 0.0746 | 0.0327 |              | conserved hypothetical protein                                                     |
| Cluster_21640  | 18 | 17 | 6  | 0  | 75  | 100 | AI | 3.18 | 0.0746 | 0.0327 | <i>nagE</i>  | PTS system, N-acetylglucosamine-specific IIBC component                            |
| Cluster_217662 | 0  | 4  | 24 | 13 | 0   | 24  | AI | 3.87 | 0.0491 | 0.0235 |              | conserved hypothetical protein                                                     |
| Cluster_218232 | 8  | 0  | 16 | 17 | 33  | 0   | LI | 5.08 | 0.0242 | 0.0128 |              | conserved hypothetical protein                                                     |
| Cluster_221116 | 7  | 0  | 17 | 17 | 29  | 0   | LI | 4.10 | 0.0430 | 0.0295 |              | hypothetical protein                                                               |
| Cluster_221391 | 11 | 2  | 13 | 15 | 46  | 12  | LI | 3.88 | 0.0490 | 0.0391 |              | conserved hypothetical protein                                                     |
| Cluster_221708 | 9  | 1  | 15 | 16 | 38  | 6   | LI | 3.82 | 0.0508 | 0.0281 |              | conserved hypothetical protein                                                     |
| Cluster_221813 | 19 | 8  | 5  | 9  | 79  | 47  | LI | 3.25 | 0.0716 | 0.0476 |              | conserved hypothetical protein                                                     |
| Cluster_221927 | 6  | 0  | 18 | 17 | 25  | 0   | LI | 3.18 | 0.0746 | 0.0327 |              | phage Tail Collar domain protein                                                   |
| Cluster_222331 | 15 | 4  | 9  | 13 | 63  | 24  | LI | 4.61 | 0.0318 | 0.0252 |              | phage portal protein, HK97 family                                                  |
| Cluster_222333 | 17 | 4  | 7  | 13 | 71  | 24  | LI | 7.12 | 0.0076 | 0.0044 |              | phage major capsid protein, HK97 family                                            |
| Cluster_222761 | 9  | 1  | 15 | 16 | 38  | 6   | LI | 3.82 | 0.0508 | 0.0281 |              | putative escherichia coli chi7122 chi7122 genomic chromosome, chi7122              |
| Cluster_222808 | 6  | 0  | 18 | 17 | 25  | 0   | LI | 3.18 | 0.0746 | 0.0327 |              | polysaccharide biosynthesis/export family protein                                  |
| Cluster_225286 | 4  | 8  | 20 | 9  | 17  | 47  | AI | 3.09 | 0.0786 | 0.0454 |              | RHS Repeat family protein                                                          |
| Cluster_225861 | 3  | 8  | 21 | 9  | 13  | 47  | AI | 4.42 | 0.0355 | 0.0292 | <i>psu</i>   | polarity suppression protein                                                       |
| Cluster_23022  | 7  | 0  | 17 | 17 | 29  | 0   | LI | 4.10 | 0.0430 | 0.0295 |              | conserved hypothetical protein                                                     |
| Cluster_230986 | 2  | 6  | 22 | 11 | 8   | 35  | AI | 3.05 | 0.0808 | 0.0486 | <i>rfaB</i>  | glucose-1-phosphate thymidyltransferase                                            |
| Cluster_232988 | 12 | 2  | 12 | 15 | 50  | 12  | LI | 4.88 | 0.0272 | 0.0183 |              | putative molybdate metabolism regulator                                            |
| Cluster_234042 | 6  | 0  | 18 | 17 | 25  | 0   | LI | 3.18 | 0.0746 | 0.0327 |              | 3-octaprenyl-4-hydroxybenzoate carboxy-lyase family protein                        |
| Cluster_234325 | 10 | 1  | 14 | 16 | 42  | 6   | LI | 4.80 | 0.0285 | 0.0136 |              | bacterial extracellular solute-binding, 5 Middle family protein                    |
| Cluster_234872 | 11 | 2  | 13 | 15 | 46  | 12  | LI | 3.88 | 0.0490 | 0.0391 |              | lysR substrate binding domain protein                                              |
| Cluster_236134 | 16 | 5  | 8  | 12 | 67  | 29  | LI | 4.14 | 0.0419 | 0.0278 | <i>dhfrI</i> | dihydrofolate reductase type 1                                                     |
| Cluster_236502 | 6  | 0  | 18 | 17 | 25  | 0   | LI | 3.18 | 0.0746 | 0.0327 |              | binding-protein-dependent transport system inner membrane component family protein |
| Cluster_237200 | 6  | 0  | 18 | 17 | 25  | 0   | LI | 3.18 | 0.0746 | 0.0327 |              | RHS repeat-associated core domain protein                                          |
| Cluster_237298 | 6  | 0  | 18 | 17 | 25  | 0   | LI | 3.18 | 0.0746 | 0.0327 |              | conserved hypothetical protein                                                     |
| Cluster_23755  | 6  | 0  | 18 | 17 | 25  | 0   | LI | 3.18 | 0.0746 | 0.0327 |              | alpha amylase, N-terminal ig-like domain protein                                   |
| Cluster_237554 | 7  | 0  | 17 | 17 | 29  | 0   | LI | 4.10 | 0.0430 | 0.0295 |              | conserved hypothetical protein                                                     |
| Cluster_23757  | 6  | 0  | 18 | 17 | 25  | 0   | LI | 3.18 | 0.0746 | 0.0327 |              | binding-protein-dependent transport system inner membrane component family protein |
| Cluster_237572 | 22 | 11 | 2  | 6  | 92  | 65  | LI | 3.05 | 0.0808 | 0.0486 |              | head decoration protein                                                            |
| Cluster_23758  | 6  | 0  | 18 | 17 | 25  | 0   | LI | 3.18 | 0.0746 | 0.0327 |              | bacterial extracellular solute-binding family protein                              |
| Cluster_23840  | 6  | 0  | 18 | 17 | 25  | 0   | LI | 3.18 | 0.0746 | 0.0327 |              | glycosyl transferase family 2 domain protein                                       |
| Cluster_239028 | 15 | 4  | 9  | 13 | 63  | 24  | LI | 4.61 | 0.0318 | 0.0252 |              | phage portal protein, HK97 family                                                  |
| Cluster_239410 | 6  | 0  | 18 | 17 | 25  | 0   | LI | 3.18 | 0.0746 | 0.0327 |              | bacteriophage replication gene A family protein                                    |
| Cluster_240829 | 7  | 0  | 17 | 17 | 29  | 0   | LI | 4.10 | 0.0430 | 0.0295 |              | hypothetical protein                                                               |
| Cluster_243374 | 6  | 0  | 18 | 17 | 25  | 0   | LI | 3.18 | 0.0746 | 0.0327 |              | esterase family protein                                                            |
| Cluster_243375 | 6  | 0  | 18 | 17 | 25  | 0   | LI | 3.18 | 0.0746 | 0.0327 |              | tatD related DNase family protein                                                  |
| Cluster_244976 | 6  | 0  | 18 | 17 | 25  | 0   | LI | 3.18 | 0.0746 | 0.0327 | <i>ynjE</i>  | thiosulfate sulfurtransferase YnjE domain protein                                  |
| Cluster_246425 | 6  | 0  | 18 | 17 | 25  | 0   | LI | 3.18 | 0.0746 | 0.0327 |              | conserved hypothetical protein                                                     |
| Cluster_246778 | 9  | 1  | 15 | 16 | 38  | 6   | LI | 3.82 | 0.0508 | 0.0281 |              | conserved hypothetical protein                                                     |
| Cluster_252976 | 17 | 4  | 7  | 13 | 71  | 24  | LI | 7.12 | 0.0076 | 0.0044 |              | phage prohead protease, HK97 family                                                |
| Cluster_257914 | 24 | 12 | 0  | 5  | 100 | 71  | LI | 5.53 | 0.0187 | 0.0083 | <i>cadC</i>  | transcriptional activator CadC                                                     |
| Cluster_258248 | 6  | 12 | 18 | 5  | 25  | 71  | AI | 6.65 | 0.0099 | 0.0052 |              | conserved hypothetical protein                                                     |
| Cluster_259563 | 18 | 17 | 6  | 0  | 75  | 100 | AI | 3.18 | 0.0746 | 0.0327 |              | MASE1 family protein                                                               |
| Cluster_261591 | 17 | 4  | 7  | 13 | 71  | 24  | LI | 7.12 | 0.0076 | 0.0044 |              | methyltransferase domain protein                                                   |
| Cluster_261646 | 22 | 11 | 2  | 6  | 92  | 65  | LI | 3.05 | 0.0808 | 0.0486 |              | phage/conjugal plasmid C-4 type zinc finger , TraR family protein                  |
| Cluster_261814 | 6  | 0  | 18 | 17 | 25  | 0   | LI | 3.18 | 0.0746 | 0.0327 |              | conserved hypothetical protein                                                     |
| Cluster_262069 | 12 | 2  | 12 | 15 | 50  | 12  | LI | 4.88 | 0.0272 | 0.0183 |              | istB-like ATP binding family protein                                               |
| Cluster_263937 | 9  | 1  | 15 | 16 | 38  | 6   | LI | 3.82 | 0.0508 | 0.0281 |              | conserved hypothetical protein                                                     |
| Cluster_263945 | 7  | 0  | 17 | 17 | 29  | 0   | LI | 4.10 | 0.0430 | 0.0295 |              | conserved hypothetical protein                                                     |
| Cluster_263946 | 7  | 0  | 17 | 17 | 29  | 0   | LI | 4.10 | 0.0430 | 0.0295 |              | phage major capsid E family protein                                                |
| Cluster_263948 | 7  | 0  | 17 | 17 | 29  | 0   | LI | 4.10 | 0.0430 | 0.0295 |              | conserved hypothetical protein                                                     |
| Cluster_264826 | 19 | 7  | 5  | 10 | 79  | 41  | LI | 4.66 | 0.0309 | 0.0212 |              | yagB/YeeU/YfjZ family protein                                                      |
| Cluster_265225 | 18 | 17 | 6  | 0  | 75  | 100 | AI | 3.18 | 0.0746 | 0.0327 |              | PRD domain protein                                                                 |
| Cluster_266373 | 17 | 4  | 7  | 13 | 71  | 24  | LI | 7.12 | 0.0076 | 0.0044 |              | lysis S family protein                                                             |
| Cluster_267179 | 20 | 9  | 4  | 8  | 83  | 53  | LI | 3.09 | 0.0786 | 0.0454 |              | conserved hypothetical protein                                                     |
| Cluster_267890 | 5  | 9  | 19 | 8  | 21  | 53  | AI | 3.25 | 0.0716 | 0.0476 |              | bacteriophage replication gene A family protein                                    |
| Cluster_268703 | 3  | 9  | 21 | 8  | 13  | 53  | AI | 6.03 | 0.0141 | 0.0127 | <i>espJ</i>  | putative non-LEE-encoded effector EspJ                                             |
| Cluster_271134 | 2  | 6  | 22 | 11 | 8   | 35  | AI | 3.05 | 0.0808 | 0.0486 |              | outer membrane autotransporter barrel domain protein                               |
| Cluster_271379 | 15 | 16 | 9  | 1  | 63  | 94  | AI | 3.82 | 0.0508 | 0.0281 |              | glycosyl hydrolase family 65, N-terminal domain protein                            |
| Cluster_271578 | 4  | 10 | 20 | 7  | 17  | 59  | AI | 6.10 | 0.0135 | 0.0079 |              | conserved hypothetical protein                                                     |
| Cluster_271588 | 1  | 6  | 23 | 11 | 4   | 35  | AI | 4.79 | 0.0286 | 0.01   |              |                                                                                    |



|                |    |    |    |    |     |     |    |      |        |        |                                                                           |
|----------------|----|----|----|----|-----|-----|----|------|--------|--------|---------------------------------------------------------------------------|
| Cluster_271719 | 6  | 11 | 18 | 6  | 25  | 65  | AI | 4.93 | 0.0264 | 0.0230 | conserved hypothetical protein                                            |
| Cluster_272941 | 19 | 6  | 5  | 11 | 79  | 35  | LI | 6.31 | 0.0120 | 0.0086 | phage tail E family protein                                               |
| Cluster_273556 | 4  | 8  | 20 | 9  | 17  | 47  | AI | 3.09 | 0.0786 | 0.0454 | glycosyltransferase like 2 family protein                                 |
| Cluster_274418 | 4  | 8  | 20 | 9  | 17  | 47  | AI | 3.09 | 0.0786 | 0.0454 | mu-like prophage FluMu gp41 family protein                                |
| Cluster_275815 | 18 | 17 | 6  | 0  | 75  | 100 | AI | 3.18 | 0.0746 | 0.0327 | GDP-mannose mannosyl hydrolase                                            |
| Cluster_276264 | 11 | 2  | 13 | 15 | 46  | 12  | LI | 3.88 | 0.0490 | 0.0391 | replication regulatory RepB family protein                                |
| Cluster_280171 | 18 | 17 | 6  | 0  | 75  | 100 | AI | 3.18 | 0.0746 | 0.0327 | tat-linked quality control protein TatD                                   |
| Cluster_283175 | 7  | 0  | 17 | 17 | 29  | 0   | LI | 4.10 | 0.0430 | 0.0295 | bacterial regulatory, luxR family protein                                 |
| Cluster_284077 | 17 | 6  | 7  | 11 | 71  | 35  | LI | 3.76 | 0.0524 | 0.0308 | ferric enterobactin (Enterochelin) transport                              |
| Cluster_286879 | 6  | 0  | 18 | 17 | 25  | 0   | LI | 3.18 | 0.0746 | 0.0327 | conserved hypothetical protein                                            |
| Cluster_289072 | 9  | 1  | 15 | 16 | 38  | 6   | LI | 3.82 | 0.0508 | 0.0281 | transposase DDE domain protein                                            |
| Cluster_289981 | 12 | 2  | 12 | 15 | 50  | 12  | LI | 4.88 | 0.0272 | 0.0183 | integrase core domain protein                                             |
| Cluster_290717 | 11 | 14 | 13 | 3  | 46  | 82  | AI | 4.15 | 0.0417 | 0.0251 | istB-like ATP binding family protein                                      |
| Cluster_295885 | 18 | 17 | 6  | 0  | 75  | 100 | AI | 3.18 | 0.0746 | 0.0327 | acetyltransferase domain protein                                          |
| Cluster_296966 | 0  | 5  | 24 | 12 | 0   | 29  | AI | 5.53 | 0.0187 | 0.0083 | conserved hypothetical protein                                            |
| Cluster_301785 | 4  | 8  | 20 | 9  | 17  | 47  | AI | 3.09 | 0.0786 | 0.0454 | phage tail tape measure protein, TP901 family, core region                |
| Cluster_302107 | 14 | 2  | 10 | 15 | 58  | 12  | LI | 7.22 | 0.0072 | 0.0035 | conserved hypothetical protein                                            |
| Cluster_308000 | 7  | 12 | 17 | 5  | 29  | 71  | AI | 5.30 | 0.0213 | 0.0124 | type-F conjugative transfer system mating-pair stabilization protein TraN |
| Cluster_310837 | 0  | 5  | 24 | 12 | 0   | 29  | AI | 5.53 | 0.0187 | 0.0083 | trnN                                                                      |
| Cluster_312941 | 7  | 0  | 17 | 17 | 29  | 0   | LI | 4.10 | 0.0430 | 0.0295 | kilR                                                                      |
| Cluster_313541 | 6  | 0  | 18 | 17 | 25  | 0   | LI | 3.18 | 0.0746 | 0.0327 | putative antirepressor protein                                            |
| Cluster_313758 | 6  | 0  | 18 | 17 | 25  | 0   | LI | 3.18 | 0.0746 | 0.0327 | conserved hypothetical protein                                            |
| Cluster_313761 | 9  | 0  | 15 | 17 | 38  | 0   | LI | 6.13 | 0.0133 | 0.0055 | caudovirales tail fibre assembly family protein                           |
| Cluster_314109 | 6  | 0  | 18 | 17 | 25  | 0   | LI | 3.18 | 0.0746 | 0.0327 | HNH endonuclease family protein                                           |
| Cluster_314206 | 7  | 0  | 17 | 17 | 29  | 0   | LI | 4.10 | 0.0430 | 0.0295 | CRISPR type I-E/ECOLI-associated protein CasB/Cse2                        |
| Cluster_315364 | 6  | 0  | 18 | 17 | 25  | 0   | LI | 3.18 | 0.0746 | 0.0327 | type III secretion apparatus protein PrgH/EprH                            |
| Cluster_315365 | 6  | 0  | 18 | 17 | 25  | 0   | LI | 3.18 | 0.0746 | 0.0327 | archaeal transcriptional regulator TrmB family protein                    |
| Cluster_315366 | 6  | 0  | 18 | 17 | 25  | 0   | LI | 3.18 | 0.0746 | 0.0327 | ABC transporter family protein                                            |
| Cluster_315444 | 6  | 0  | 18 | 17 | 25  | 0   | LI | 3.18 | 0.0746 | 0.0327 | putative glycosidase                                                      |
| Cluster_316058 | 6  | 0  | 18 | 17 | 25  | 0   | LI | 3.18 | 0.0746 | 0.0327 | papC C-terminal domain protein                                            |
| Cluster_316833 | 6  | 0  | 18 | 17 | 25  | 0   | LI | 3.18 | 0.0746 | 0.0327 | phospholipase_D-nuclease N-terminal family protein                        |
| Cluster_317010 | 9  | 1  | 15 | 16 | 38  | 6   | LI | 3.82 | 0.0508 | 0.0281 | conserved hypothetical protein                                            |
| Cluster_317549 | 7  | 0  | 17 | 17 | 29  | 0   | LI | 4.10 | 0.0430 | 0.0295 | conserved hypothetical protein                                            |
| Cluster_317550 | 6  | 0  | 18 | 17 | 25  | 0   | LI | 3.18 | 0.0746 | 0.0327 | ead/Ea22-like family protein                                              |
| Cluster_317551 | 7  | 0  | 17 | 17 | 29  | 0   | LI | 4.10 | 0.0430 | 0.0295 | conserved hypothetical protein                                            |
| Cluster_318890 | 0  | 5  | 24 | 12 | 0   | 29  | AI | 5.53 | 0.0187 | 0.0083 | conserved hypothetical protein                                            |
| Cluster_318894 | 0  | 5  | 24 | 12 | 0   | 29  | AI | 5.53 | 0.0187 | 0.0083 | nucleoside transporter family protein                                     |
| Cluster_31976  | 5  | 10 | 19 | 7  | 21  | 59  | AI | 4.66 | 0.0309 | 0.0212 | lysR substrate binding domain protein                                     |
| Cluster_321224 | 2  | 8  | 22 | 9  | 8   | 47  | AI | 6.13 | 0.0133 | 0.0083 | lipopolysaccharide core heptose(II) kinase RfaY                           |
| Cluster_321885 | 0  | 4  | 24 | 13 | 0   | 24  | AI | 3.87 | 0.0491 | 0.0235 | conserved hypothetical protein                                            |
| Cluster_321886 | 0  | 4  | 24 | 13 | 0   | 24  | AI | 3.87 | 0.0491 | 0.0235 | conserved hypothetical protein                                            |
| Cluster_32291  | 18 | 17 | 6  | 0  | 75  | 100 | AI | 3.18 | 0.0746 | 0.0327 | hNH endonuclease family protein                                           |
| Cluster_322922 | 15 | 3  | 9  | 14 | 63  | 18  | LI | 6.41 | 0.0114 | 0.0096 | deoxycytidine triphosphate deaminase                                      |
| Cluster_326026 | 2  | 8  | 22 | 9  | 8   | 47  | AI | 6.13 | 0.0133 | 0.0083 | lysis S family protein                                                    |
| Cluster_326910 | 22 | 11 | 2  | 6  | 92  | 65  | LI | 3.05 | 0.0808 | 0.0486 | fimbrial family protein                                                   |
| Cluster_331430 | 24 | 13 | 0  | 4  | 100 | 76  | LI | 3.87 | 0.0491 | 0.0235 | hydantoinase/oxoprolinase family protein                                  |
| Cluster_34074  | 17 | 4  | 7  | 13 | 71  | 24  | LI | 7.12 | 0.0076 | 0.0044 | conserved hypothetical protein                                            |
| Cluster_34159  | 13 | 2  | 11 | 15 | 54  | 12  | LI | 5.99 | 0.0144 | 0.0082 | lysis S family protein                                                    |
| Cluster_342998 | 17 | 4  | 7  | 13 | 71  | 24  | LI | 7.12 | 0.0076 | 0.0044 | conserved hypothetical protein                                            |
| Cluster_345268 | 18 | 17 | 6  | 0  | 75  | 100 | AI | 3.18 | 0.0746 | 0.0327 | phage tail protein I                                                      |
| Cluster_346478 | 21 | 8  | 3  | 9  | 88  | 47  | LI | 6.03 | 0.0141 | 0.0127 | fructose-like permease IIC component 1                                    |
| Cluster_347476 | 20 | 9  | 4  | 8  | 83  | 53  | LI | 3.09 | 0.0786 | 0.0454 | conserved hypothetical protein                                            |
| Cluster_3745   | 4  | 8  | 20 | 9  | 17  | 47  | AI | 3.09 | 0.0786 | 0.0454 | aminotransferase class I and II family protein                            |
| Cluster_40177  | 22 | 11 | 2  | 6  | 92  | 65  | LI | 3.05 | 0.0808 | 0.0486 | major tail V domain protein                                               |
| Cluster_43613  | 15 | 4  | 9  | 13 | 63  | 24  | LI | 4.61 | 0.0318 | 0.0252 | phage gp6-like head-tail connector family protein                         |
| Cluster_44635  | 17 | 17 | 7  | 0  | 71  | 100 | AI | 4.10 | 0.0430 | 0.0295 | type III secretion , HrpO family protein                                  |
| Cluster_4527   | 22 | 10 | 2  | 7  | 92  | 59  | LI | 4.49 | 0.0340 | 0.0208 | tail attachment protein                                                   |
| Cluster_4740   | 6  | 0  | 18 | 17 | 25  | 0   | LI | 3.18 | 0.0746 | 0.0327 | marR family protein                                                       |
| Cluster_47784  | 4  | 8  | 20 | 9  | 17  | 47  | AI | 3.09 | 0.0786 | 0.0454 | bacterial regulatory, luxR family protein                                 |
| Cluster_52793  | 19 | 8  | 5  | 9  | 79  | 47  | LI | 3.25 | 0.0716 | 0.0476 | mannosylglycerate hydrolase                                               |
| Cluster_55403  | 4  | 10 | 20 | 7  | 17  | 59  | AI | 6.10 | 0.0135 | 0.0079 | helix-turn-helix domain protein                                           |
| Cluster_56967  | 22 | 11 | 2  | 6  | 92  | 65  | LI | 3.05 | 0.0808 | 0.0486 | RNA 2'-phosphotransferase, Tpt1 / KptA family protein                     |
| Cluster_57003  | 4  | 10 | 20 | 7  | 17  | 59  | AI | 6.10 | 0.0135 | 0.0079 | putative phage immunity repressor protein                                 |
| Cluster_58271  | 9  | 1  | 15 | 16 | 38  | 6   | LI | 3.82 | 0.0508 | 0.0281 | conserved hypothetical protein                                            |
| Cluster_59004  | 17 | 4  | 7  | 13 | 71  | 24  | LI | 7.12 | 0.0076 | 0.0044 | phage prohead protease, HK97 family                                       |
| Cluster_59760  | 7  | 0  | 17 | 17 | 29  | 0   | LI | 4.10 | 0.0430 | 0.0295 | putative variable tail fiber protein                                      |
| Cluster_72088  | 9  | 1  | 15 | 16 | 38  | 6   | LI | 3.82 | 0.0508 | 0.0281 | glycosyl transferases group 1 family protein                              |
| Cluster_72092  | 9  | 1  | 15 | 16 | 38  | 6   | LI | 3.82 | 0.0508 | 0.0281 | transposase DDE domain protein                                            |
| Cluster_72094  | 11 | 2  | 13 | 15 | 46  | 12  | LI | 3.88 | 0.0490 | 0.0391 | phage integrase family protein                                            |
| Cluster_73598  | 6  | 0  | 18 | 17 | 25  | 0   | LI | 3.18 | 0.0746 | 0.0327 | conserved hypothetical protein                                            |
| Cluster_74186  | 6  | 0  | 18 | 17 | 25  | 0   | LI | 3.18 | 0.0746 | 0.0327 | helix-turn-helix domain protein                                           |
| Cluster_74390  | 12 | 2  | 12 | 15 | 50  | 12  | LI | 4.88 | 0.0272 | 0.0183 | hypothetical protein                                                      |
| Cluster_74420  | 19 | 6  | 5  | 11 | 79  | 35  | LI | 6.31 | 0.0120 | 0.0086 | conserved hypothetical protein                                            |
| Cluster_7621   | 8  | 0  | 16 | 17 | 33  | 0   | LI | 5.08 | 0.0242 | 0.0128 | putative type III secretion EprI protein                                  |
| Cluster_78687  | 22 | 11 | 2  | 6  | 92  | 65  | LI | 3.05 | 0.0808 | 0.0486 | minor tail protein U                                                      |
| Cluster_79564  | 6  | 0  | 18 | 17 | 25  | 0   | LI | 3.18 | 0.0746 | 0.0327 | putative oxidoreductase subunit domain protein                            |
| Cluster_80022  | 6  | 0  | 18 | 17 | 25  | 0   | LI | 3.18 | 0.0746 | 0.0327 | alpha amylase, catalytic domain protein                                   |
| Cluster_80973  | 15 | 4  | 9  | 13 | 63  | 24  | LI | 4.61 | 0.0318 | 0.0252 | phage integrase family protein                                            |
| Cluster_81331  | 18 | 17 | 6  | 0  | 75  | 100 | AI | 3.18 | 0.0746 | 0.0327 | lppC lipofamily protein                                                   |
| Cluster_82167  | 9  | 1  | 15 | 16 | 38  | 6   | LI | 3.82 | 0.0508 | 0.0281 | conserved hypothetical protein                                            |
| Cluster_82835  | 16 | 5  | 8  | 12 | 67  | 29  | LI | 4.14 | 0.0419 | 0.0278 | conserved hypothetical protein                                            |
| Cluster_83254  | 6  | 0  | 18 | 17 | 25  | 0   | LI | 3.18 | 0.0746 | 0.0327 | glycosyl transferases group 1 family protein                              |
| Cluster_83927  | 6  | 0  | 18 | 17 | 25  | 0   | LI | 3.18 | 0.0746 | 0.0327 | dTDP-6-deoxy-3,4-keto-hexulose isomerase                                  |
| Cluster_83929  | 6  | 0  | 18 | 17 | 25  | 0   | LI | 3.18 | 0.0746 | 0.0327 | dTDP-glucose 4,6-dehydratase                                              |
| Cluster_84140  | 6  | 0  | 18 | 17 | 25  | 0   | LI | 3.18 | 0.0746 | 0.0327 | putative cymA protein                                                     |
| Cluster_84211  | 15 | 4  | 9  | 13 | 63  | 24  | LI | 4.61 | 0.0318 | 0.0252 | conserved hypothetical protein                                            |
| Cluster_902    | 9  | 13 | 15 | 4  | 38  | 76  | AI | 4.61 | 0.0318 | 0.0252 | outer membrane transport family protein                                   |
| Cluster_94431  | 0  | 4  | 24 | 13 | 0   | 24  | AI | 3.87 | 0.0491 | 0.0235 | hypothetical protein                                                      |
| Cluster_95057  | 7  | 0  | 17 | 17 | 29  | 0   | LI | 4.10 | 0.0430 | 0.0295 | P22AR C-terminal domain protein                                           |
| Cluster_95290  | 8  | 0  | 16 | 17 | 33  | 0   | LI | 5.08 | 0.0242 | 0.0128 | invH outer membrane lipofamily protein                                    |
| Cluster_95942  | 6  | 0  | 18 | 17 | 25  | 0   | LI | 3.18 | 0.0746 | 0.0327 | conserved hypothetical protein                                            |
| Cluster_98381  | 6  | 0  | 18 | 17 | 25  | 0   | LI | 3.18 | 0.0746 | 0.0327 | conserved hypothetical protein                                            |
| Cluster_99113  | 16 | 4  | 8  | 13 | 67  | 24  | LI | 5.79 | 0.0162 | 0.0109 | molybdopterin guanine dinucleotide synthesis B family protein             |
| Cluster_99362  | 14 | 2  | 10 | 15 | 58  | 12  | LI | 7.22 | 0.0072 | 0.0035 | putative membrane protein                                                 |
| Cluster_99439  | 6  | 0  | 18 | 17 | 25  | 0   | LI | 3.18 | 0.0746 | 0.0327 | resolvase, N terminal domain protein                                      |
|                |    |    |    |    |     |     |    |      |        |        | putative dsORF-e4                                                         |

Non-lethal Symptomatic (NSI) vs. Asymptomatic (AI)

| Cluster ID     | No. of Genomes                |                              |    |       | Percentage of Genomes Containing Cluster |           |           | Chi-squared test |         | Fisher's exact test | Gene ID     | Predicted Protein Function                                      |
|----------------|-------------------------------|------------------------------|----|-------|------------------------------------------|-----------|-----------|------------------|---------|---------------------|-------------|-----------------------------------------------------------------|
|                | Present (≥0.9) <sup>a,b</sup> | Absent (<0.9) <sup>a,b</sup> |    | % NSI | % AI                                     | Greater % | statistic | p-value          | p-value |                     |             |                                                                 |
| Cluster_103416 | 13                            | 5                            | 7  | 12    | 65                                       | 29        | NSI       | 3.34             | 0.0675  | 0.0489              |             | conserved hypothetical protein                                  |
| Cluster_104527 | 9                             | 2                            | 11 | 15    | 45                                       | 12        | NSI       | 3.40             | 0.0653  | 0.0365              | <i>fimA</i> | type-1 fimbrial protein, A chain                                |
| Cluster_104881 | 8                             | 13                           | 12 | 4     | 40                                       | 76        | AI        | 3.60             | 0.0576  | 0.0453              |             | putative toxin hlgB-2                                           |
| Cluster_108598 | 13                            | 5                            | 7  | 12    | 65                                       | 29        | NSI       | 3.34             | 0.0675  | 0.0489              |             | DNA-packaging protein FI                                        |
| Cluster_108599 | 19                            | 11                           | 1  | 6     | 95                                       | 65        | NSI       | 3.70             | 0.0544  | 0.0335              |             | tail attachment protein                                         |
| Cluster_109753 | 8                             | 13                           | 12 | 4     | 40                                       | 76        | AI        | 3.60             | 0.0576  | 0.0453              |             | outer membrane transport family protein                         |
| Cluster_111596 | 8                             | 14                           | 12 | 3     | 40                                       | 82        | AI        | 5.19             | 0.0227  | 0.0176              |             | ethanolamine utilization EutN/carboxysome family protein        |
| Cluster_111600 | 8                             | 14                           | 12 | 3     | 40                                       | 82        | AI        | 5.19             | 0.0227  | 0.0176              |             | electron transport complex, RnfABCDGE type, C subunit           |
| Cluster_11588  | 1                             | 8                            | 19 | 9     | 5                                        | 47        | AI        | 6.89             | 0.0097  | 0.0055              |             | conserved hypothetical protein                                  |
| Cluster_12200  | 4                             | 11                           | 16 | 6     | 20                                       | 65        | AI        | 5.88             | 0.0153  | 0.0084              |             | glycosyltransferase Family 4 family protein                     |
| Cluster_1225   | 16                            | 8                            | 4  | 9     | 80                                       | 47        | NSI       | 3.05             | 0.0808  | 0.0470              | <i>cbeA</i> | cytoskeleton bundling-enhancing protein CbeA                    |
| Cluster_12327  | 4                             | 10                           | 16 | 7     | 20                                       | 59        | AI        | 4.35             | 0.0369  | 0.0210              |             | putative prophage protein                                       |
| Cluster_127340 | 12                            | 4                            | 8  | 13    | 60                                       | 24        | NSI       | 3.60             | 0.0576  | 0.0453              |             | DDE_Tnp_1-associated family protein                             |
| Cluster_128422 | 15                            | 6                            | 5  | 11    | 75                                       | 35        | NSI       | 4.40             | 0.0360  | 0.0220              |             | dynamn family protein                                           |
| Cluster_128486 | 11                            | 3                            | 9  | 14    | 55                                       | 18        | NSI       | 3.98             | 0.0461  | 0.0397              |             | phage antitermination Q family protein                          |
| Cluster_128654 | 16                            | 8                            | 4  | 9     | 80                                       | 47        | NSI       | 3.05             | 0.0808  | 0.0470              |             | conserved hypothetical protein                                  |
| Cluster_131700 | 8                             | 14                           | 12 | 3     | 40                                       | 82        | AI        | 5.19             | 0.0227  | 0.0176              | <i>xseA</i> | exodeoxyribonuclease VII, large subunit                         |
| Cluster_137907 | 4                             | 10                           | 16 | 7     | 20                                       | 59        | AI        | 4.35             | 0.0369  | 0.0210              |             | hypothetical protein                                            |
| Cluster_138051 | 15                            | 4                            | 5  | 13    | 75                                       | 24        | NSI       | 7.79             | 0.0052  | 0.0029              |             | lysis S family protein                                          |
| Cluster_141364 | 11                            | 3                            | 9  | 14    | 55                                       | 18        | NSI       | 3.98             | 0.0461  | 0.0397              | <i>ompD</i> | outer membrane porin protein OmpD                               |
| Cluster_142846 | 5                             | 0                            | 15 | 17    | 25                                       | 0         | NSI       | 3.01             | 0.0829  | 0.0498              |             | conserved hypothetical protein                                  |
| Cluster_145816 | 4                             | 9                            | 16 | 8     | 20                                       | 53        | AI        | 3.05             | 0.0808  | 0.0470              |             | putative glyco3, capsid size determination protein Sid          |
| Cluster_147543 | 6                             | 0                            | 14 | 17    | 30                                       | 0         | NSI       | 4.08             | 0.0434  | 0.0220              |             | putative yfdA                                                   |
| Cluster_147907 | 1                             | 7                            | 19 | 10    | 5                                        | 41        | AI        | 5.12             | 0.0236  | 0.0140              |             | HNH endonuclease family protein                                 |
| Cluster_148358 | 2                             | 8                            | 18 | 9     | 10                                       | 47        | AI        | 4.66             | 0.0309  | 0.0234              |             | putative exported protein                                       |
| Cluster_151023 | 4                             | 11                           | 16 | 6     | 20                                       | 65        | AI        | 5.88             | 0.0153  | 0.0084              |             | conserved hypothetical protein                                  |
| Cluster_151647 | 19                            | 11                           | 1  | 6     | 95                                       | 65        | NSI       | 3.70             | 0.0544  | 0.0335              |             | phage major capsid E family protein                             |
| Cluster_152550 | 10                            | 2                            | 10 | 15    | 50                                       | 12        | NSI       | 4.51             | 0.0337  | 0.0173              |             | mbeD/MobD like family protein                                   |
| Cluster_153716 | 2                             | 9                            | 18 | 8     | 10                                       | 53        | AI        | 6.19             | 0.0129  | 0.0097              |             | conserved hypothetical protein                                  |
| Cluster_153717 | 2                             | 10                           | 18 | 7     | 10                                       | 59        | AI        | 7.89             | 0.0050  | 0.0037              | <i>rfaY</i> | lipopolysaccharide core heptose(II) kinase RfaY                 |
| Cluster_153719 | 2                             | 10                           | 18 | 7     | 10                                       | 59        | AI        | 7.89             | 0.0050  | 0.0037              |             | glycosyl transferase 8 family protein                           |
| Cluster_167315 | 19                            | 11                           | 1  | 6     | 95                                       | 65        | NSI       | 3.70             | 0.0544  | 0.0335              |             | conserved hypothetical protein                                  |
| Cluster_167317 | 17                            | 8                            | 3  | 9     | 85                                       | 47        | NSI       | 4.43             | 0.0353  | 0.0323              |             | intergenic-region protein                                       |
| Cluster_167318 | 19                            | 11                           | 1  | 6     | 95                                       | 65        | NSI       | 3.70             | 0.0544  | 0.0335              |             | DNA repair RadC family protein                                  |
| Cluster_168494 | 8                             | 13                           | 12 | 4     | 40                                       | 76        | AI        | 3.60             | 0.0576  | 0.0453              |             | conserved hypothetical protein                                  |
| Cluster_168917 | 0                             | 4                            | 20 | 13    | 0                                        | 24        | AI        | 3.12             | 0.0774  | 0.0360              |             | nucleoside 2-deoxyribosyltransferase family protein             |
| Cluster_169965 | 4                             | 10                           | 16 | 7     | 20                                       | 59        | AI        | 4.35             | 0.0369  | 0.0210              |             | ogr/Delta-like zinc finger family protein                       |
| Cluster_173912 | 7                             | 1                            | 13 | 16    | 35                                       | 6         | NSI       | 3.04             | 0.0813  | 0.0481              | <i>espZ</i> | sepZ family protein                                             |
| Cluster_178274 | 20                            | 11                           | 0  | 6     | 100                                      | 65        | NSI       | 6.03             | 0.0141  | 0.0053              |             | conserved hypothetical protein                                  |
| Cluster_178309 | 9                             | 2                            | 11 | 15    | 45                                       | 12        | NSI       | 3.40             | 0.0653  | 0.0365              |             | conserved hypothetical protein                                  |
| Cluster_17854  | 8                             | 1                            | 12 | 16    | 40                                       | 6         | NSI       | 4.11             | 0.0428  | 0.0227              |             | conserved hypothetical protein                                  |
| Cluster_178542 | 6                             | 0                            | 14 | 17    | 30                                       | 0         | NSI       | 4.08             | 0.0434  | 0.0220              | <i>epaR</i> | type III secretion apparatus protein SpaR/YscT/HrcT             |
| Cluster_178543 | 7                             | 1                            | 13 | 16    | 35                                       | 6         | NSI       | 3.04             | 0.0813  | 0.0481              |             | type III secretion , HrpO family protein                        |
| Cluster_180288 | 16                            | 7                            | 4  | 10    | 80                                       | 41        | NSI       | 4.35             | 0.0369  | 0.0210              | <i>xseA</i> | exodeoxyribonuclease VII, large subunit                         |
| Cluster_182223 | 11                            | 3                            | 9  | 14    | 55                                       | 18        | NSI       | 3.98             | 0.0461  | 0.0397              |             | putative outer membrane fimbrial usher protein                  |
| Cluster_183305 | 7                             | 1                            | 13 | 16    | 35                                       | 6         | NSI       | 3.04             | 0.0813  | 0.0481              |             | putative type III secretion protein EprJ                        |
| Cluster_183342 | 7                             | 13                           | 13 | 4     | 35                                       | 76        | AI        | 4.80             | 0.0284  | 0.0202              |             | hypothetical protein                                            |
| Cluster_185869 | 1                             | 7                            | 19 | 10    | 5                                        | 41        | AI        | 5.12             | 0.0236  | 0.0140              |             | transposase family protein                                      |
| Cluster_18601  | 13                            | 16                           | 7  | 1     | 65                                       | 94        | AI        | 3.04             | 0.0813  | 0.0481              |             | ribbon-helix-helix , copG family protein                        |
| Cluster_188375 | 17                            | 7                            | 3  | 10    | 85                                       | 41        | NSI       | 5.94             | 0.0148  | 0.0075              |             | phage major capsid E family protein                             |
| Cluster_18923  | 4                             | 11                           | 16 | 6     | 20                                       | 65        | AI        | 5.88             | 0.0153  | 0.0084              |             | glycosyltransferase Family 4 family protein                     |
| Cluster_192298 | 4                             | 10                           | 16 | 7     | 20                                       | 59        | AI        | 4.35             | 0.0369  | 0.0210              |             | transposase IS116/IS110/IS902 family protein                    |
| Cluster_196208 | 8                             | 14                           | 12 | 3     | 40                                       | 82        | AI        | 5.19             | 0.0227  | 0.0176              | <i>eutP</i> | ethanolamine utilization protein, EutP                          |
| Cluster_196216 | 8                             | 13                           | 12 | 4     | 40                                       | 76        | AI        | 3.60             | 0.0576  | 0.0453              |             | putative propanediol utilization protein                        |
| Cluster_196229 | 8                             | 14                           | 12 | 3     | 40                                       | 82        | AI        | 5.19             | 0.0227  | 0.0176              |             | putative cobalamin biosynthesis protein CbiG                    |
| Cluster_197488 | 7                             | 1                            | 13 | 16    | 35                                       | 6         | NSI       | 3.04             | 0.0813  | 0.0481              |             | putative dNA-binding transcriptional regulator                  |
| Cluster_198519 | 2                             | 9                            | 18 | 8     | 10                                       | 53        | AI        | 6.19             | 0.0129  | 0.0097              |             | transposase family protein                                      |
| Cluster_200453 | 4                             | 10                           | 16 | 7     | 20                                       | 59        | AI        | 4.35             | 0.0369  | 0.0210              |             | putative derepression protein                                   |
| Cluster_20103  | 12                            | 4                            | 8  | 13    | 60                                       | 24        | NSI       | 3.60             | 0.0576  | 0.0453              |             | outer membrane transport family protein                         |
| Cluster_203385 | 3                             | 9                            | 17 | 8     | 15                                       | 53        | AI        | 4.43             | 0.0353  | 0.0323              |             | conserved hypothetical family protein                           |
| Cluster_212386 | 20                            | 13                           | 0  | 4     | 100                                      | 76        | NSI       | 3.12             | 0.0774  | 0.0360              |             | sigma-54 interaction domain protein                             |
| Cluster_218232 | 5                             | 0                            | 15 | 17    | 25                                       | 0         | NSI       | 3.01             | 0.0829  | 0.0498              |             | conserved hypothetical protein                                  |
| Cluster_218915 | 20                            | 13                           | 0  | 4     | 100                                      | 76        | NSI       | 3.12             | 0.0774  | 0.0360              |             | parB-like nuclease domain protein                               |
| Cluster_221767 | 11                            | 2                            | 9  | 15    | 55                                       | 12        | NSI       | 5.76             | 0.0164  | 0.0140              | <i>nleA</i> | putative nleA1 protein                                          |
| Cluster_222895 | 8                             | 1                            | 12 | 16    | 40                                       | 6         | NSI       | 4.11             | 0.0428  | 0.0227              |             | conserved hypothetical protein                                  |
| Cluster_225286 | 1                             | 8                            | 19 | 9     | 5                                        | 47        | AI        | 6.89             | 0.0097  | 0.0055              |             | RHS Repeat family protein                                       |
| Cluster_225773 | 8                             | 14                           | 12 | 3     | 40                                       | 82        | AI        | 5.19             | 0.0227  | 0.0176              | <i>pduD</i> | propanediol dehydratase medium subunit                          |
| Cluster_225778 | 8                             | 14                           | 12 | 3     | 40                                       | 82        | AI        | 5.19             | 0.0227  | 0.0176              |             | BMC domain protein                                              |
| Cluster_227577 | 2                             | 8                            | 18 | 9     | 10                                       | 47        | AI        | 4.66             | 0.0309  | 0.0234              | <i>ssb</i>  | single-stranded DNA-binding protein                             |
| Cluster_23022  | 5                             | 0                            | 15 | 17    | 25                                       | 0         | NSI       | 3.01             | 0.0829  | 0.0498              |             | conserved hypothetical protein                                  |
| Cluster_230774 | 8                             | 14                           | 12 | 3     | 40                                       | 82        | AI        | 5.19             | 0.0227  | 0.0176              | <i>pduL</i> | phosphate propanoyltransferase                                  |
| Cluster_230986 | 0                             | 6                            | 20 | 11    | 0                                        | 35        | AI        | 6.03             | 0.0141  | 0.0053              | <i>rfbA</i> | glucose-1-phosphate thymidyltransferase                         |
| Cluster_232396 | 1                             | 8                            | 19 | 9     | 5                                        | 47        | AI        | 6.89             | 0.0097  | 0.0055              |             | putative dNA-binding helix-turn-helix protein                   |
| Cluster_233786 | 11                            | 2                            | 9  | 15    | 55                                       | 12        | NSI       | 5.76             | 0.0164  | 0.0140              | <i>eae</i>  | intimin                                                         |
| Cluster_234325 | 7                             | 1                            | 13 | 16    | 35                                       | 6         | NSI       | 3.04             | 0.0813  | 0.0481              |             | bacterial extracellular solute-binding, 5 Middle family protein |
| Cluster_23668  | 20                            | 13                           | 0  | 4     | 100                                      | 76        | NSI       | 3.12             | 0.0774  | 0.0360              | <i>allC</i> | allantoate amidohydrolase                                       |
| Cluster_237554 | 7                             | 0                            | 13 | 17    | 35                                       | 0         | NSI       | 5.23             | 0.0221  | 0.0094              |             | conserved hypothetical protein                                  |
| Cluster_237572 | 19                            | 11                           | 1  | 6     | 95                                       | 65        | NSI       | 3.70             | 0.0544  | 0.0335              |             | head decoration protein                                         |
| Cluster_237633 | 19                            | 11                           | 1  | 6     | 95                                       | 65        | NSI       | 3.70             | 0.0544  | 0.0335              |             | transposase, IS605 OrfB family                                  |
| Cluster_248119 | 13                            | 5                            | 7  | 12    | 65                                       | 29        | NSI       | 3.34             | 0.0675  | 0.0489              |             | dnaB-like helicase N terminal domain protein                    |
| Cluster_253514 | 20                            | 11                           | 0  | 6     | 100                                      | 65        | NSI       | 6.03             | 0.0141  | 0.0053              | <i>wcaF</i> | colanic acid biosynthesis acetyltransferase WcaF                |
| Cluster_259786 | 8                             | 14                           | 12 | 3     | 40                                       | 82        | AI        | 5.19             | 0.0227  | 0.0176              | <i>pduC</i> | propanediol dehydratase large subunit                           |
| Cluster_259788 | 8                             | 14                           | 12 | 3     | 40                                       | 82        | AI        | 5.19             | 0.0227  | 0.0176              | <i>pduE</i> | propanediol dehydratase small subunit                           |
| Cluster_26108  | 11                            | 3                            | 9  | 14    | 55                                       | 18        | NSI       | 3.98             | 0.0461  | 0.0397              | <i>ompD</i> | outer membrane porin protein OmpD                               |
| Cluster_261591 | 14                            | 4                            | 6  | 13    | 70                                       | 24        | NSI       | 6.19             | 0.0128  | 0.0081              |             | methyltransferase domain protein                                |
| Cluster_265851 | 8                             | 14                           | 12 | 3     | 40                                       | 82        | AI        | 5.19             | 0.0227  | 0.0176              |             | BMC domain protein                                              |
| Cluster_266373 | 15                            | 4                            | 5  | 13    | 75                                       | 24        | NSI       | 7.79             | 0.0052  | 0.0029              |             | lysis S family protein                                          |
| Cluster_267342 | 13                            | 5                            | 7  | 12    | 65                                       | 29        | NSI       | 3.34             | 0.0675  | 0.0489              |             | putative bacteriophage protein                                  |
| Cluster_268703 | 3                             | 9                            | 17 | 8     | 15                                       | 53        | AI        | 4.43             | 0.0353  | 0.0323              | <i>espJ</i> | putative non-LEE-encoded effector EspJ                          |
| Cluster_271578 | 4                             | 10                           | 16 | 7     | 20                                       | 59        | AI        | 4.35             | 0.0369  | 0.0210              |             | conserved hypothetical protein                                  |
| Cluster_271719 | 4                             | 11                           | 16 | 6     | 20                                       | 65        | AI        | 5.88             | 0.0153  | 0.0084              |             | conserved hypothetical protein                                  |
| Cluster_273174 | 20                            | 13                           | 0  | 4     | 100                                      | 76        | NSI       | 3.12             | 0.0774  | 0.0360              | <i>cobC</i> | alpha-ribazole phosphatase                                      |
| Cluster_275755 | 8                             | 14                           | 12 | 3     | 40                                       | 82        | AI        | 5.19             | 0.0227  | 0.0176              | <i>pduU</i> | propanediol utilization protein PduU                            |

|                |    |    |    |    |     |    |     |      |        |        |             |                                                      |
|----------------|----|----|----|----|-----|----|-----|------|--------|--------|-------------|------------------------------------------------------|
| Cluster_275766 | 8  | 14 | 12 | 3  | 40  | 82 | AI  | 5.19 | 0.0227 | 0.0176 |             |                                                      |
| Cluster_275878 | 17 | 8  | 3  | 9  | 85  | 47 | NSI | 4.43 | 0.0353 | 0.0323 |             | dehydratase medium subunit                           |
| Cluster_281680 | 11 | 3  | 9  | 14 | 55  | 18 | NSI | 3.98 | 0.0461 | 0.0397 |             | lysR substrate binding domain protein                |
| Cluster_283607 | 12 | 4  | 8  | 13 | 60  | 24 | NSI | 3.60 | 0.0576 | 0.0453 |             | phage antitermination Q family protein               |
| Cluster_285341 | 12 | 4  | 8  | 13 | 60  | 24 | NSI | 3.60 | 0.0576 | 0.0453 |             | methyltransferase domain protein                     |
| Cluster_291265 | 8  | 14 | 12 | 3  | 40  | 82 | AI  | 5.19 | 0.0227 | 0.0176 |             | H <sup>+</sup> symporter family protein              |
| Cluster_291267 | 8  | 14 | 12 | 3  | 40  | 82 | AI  | 5.19 | 0.0227 | 0.0176 | <i>pduT</i> | iron-containing alcohol dehydrogenase family protein |
| Cluster_294187 | 19 | 10 | 1  | 7  | 95  | 59 | NSI | 5.12 | 0.0236 | 0.0140 |             | shell protein                                        |
| Cluster_29592  | 10 | 15 | 10 | 2  | 50  | 88 | AI  | 4.51 | 0.0337 | 0.0173 |             | conserved hypothetical protein                       |
| Cluster_296966 | 0  | 5  | 20 | 12 | 0   | 29 | AI  | 4.52 | 0.0335 | 0.0142 |             | conserved hypothetical protein                       |
| Cluster_297448 | 7  | 14 | 13 | 3  | 35  | 82 | AI  | 6.58 | 0.0103 | 0.0071 |             | conserved hypothetical protein                       |
| Cluster_301551 | 1  | 6  | 19 | 11 | 5   | 35 | AI  | 3.70 | 0.0544 | 0.0335 |             | phage tail protein I                                 |
| Cluster_302270 | 15 | 7  | 5  | 10 | 75  | 41 | NSI | 3.07 | 0.0797 | 0.0498 |             | bacterial Ig-like domain family protein              |
| Cluster_302692 | 13 | 5  | 7  | 12 | 65  | 29 | NSI | 3.34 | 0.0675 | 0.0489 |             | hypothetical protein                                 |
| Cluster_302715 | 19 | 11 | 1  | 6  | 95  | 65 | NSI | 3.70 | 0.0544 | 0.0335 |             | conserved hypothetical protein                       |
| Cluster_303767 | 5  | 10 | 15 | 7  | 25  | 59 | AI  | 3.07 | 0.0797 | 0.0498 |             | repressor protein Cl                                 |
| Cluster_307827 | 10 | 2  | 10 | 15 | 50  | 12 | NSI | 4.51 | 0.0337 | 0.0173 | <i>mbeC</i> | mobilization protein MbeC                            |
| Cluster_307926 | 13 | 5  | 7  | 12 | 65  | 29 | NSI | 3.34 | 0.0675 | 0.0489 | <i>traY</i> | relaxosome protein TraY                              |
| Cluster_307965 | 12 | 3  | 8  | 14 | 60  | 18 | NSI | 5.19 | 0.0227 | 0.0176 |             | traP family protein                                  |
| Cluster_309716 | 5  | 10 | 15 | 7  | 25  | 59 | AI  | 3.07 | 0.0797 | 0.0498 | <i>espF</i> | espF repeat family protein                           |
| Cluster_309725 | 1  | 6  | 19 | 11 | 5   | 35 | AI  | 3.70 | 0.0544 | 0.0335 | <i>eae</i>  | intimin                                              |
| Cluster_310837 | 0  | 5  | 20 | 12 | 0   | 29 | AI  | 4.52 | 0.0335 | 0.0142 | <i>kilR</i> | killing protein KilR                                 |
| Cluster_313775 | 15 | 7  | 5  | 10 | 75  | 41 | NSI | 3.07 | 0.0797 | 0.0498 |             | outer membrane autotransporter barrel domain protein |
| Cluster_317369 | 15 | 7  | 5  | 10 | 75  | 41 | NSI | 3.07 | 0.0797 | 0.0498 |             | tellurite resistance TerB family protein             |
| Cluster_318890 | 0  | 5  | 20 | 12 | 0   | 29 | AI  | 4.52 | 0.0335 | 0.0142 |             | nucleoside transporter family protein                |
| Cluster_318894 | 0  | 5  | 20 | 12 | 0   | 29 | AI  | 4.52 | 0.0335 | 0.0142 |             | lysR substrate binding domain protein                |
| Cluster_319379 | 2  | 8  | 18 | 9  | 10  | 47 | AI  | 4.66 | 0.0309 | 0.0234 | <i>rfaJ</i> | lipopolysaccharide 1,2-glucosyltransferase           |
| Cluster_31976  | 2  | 10 | 18 | 7  | 10  | 59 | AI  | 7.89 | 0.0050 | 0.0037 | <i>rfaY</i> | lipopolysaccharide core heptose(II) kinase RfaY      |
| Cluster_31977  | 2  | 8  | 18 | 9  | 10  | 47 | AI  | 4.66 | 0.0309 | 0.0234 | <i>rfaJ</i> | lipopolysaccharide 1,2-glucosyltransferase           |
| Cluster_321135 | 8  | 14 | 12 | 3  | 40  | 82 | AI  | 5.19 | 0.0227 | 0.0176 |             | helix-turn-helix domain protein                      |
| Cluster_321136 | 8  | 14 | 12 | 3  | 40  | 82 | AI  | 5.19 | 0.0227 | 0.0176 |             | MIP channel family protein                           |
| Cluster_321224 | 2  | 8  | 18 | 9  | 10  | 47 | AI  | 4.66 | 0.0309 | 0.0234 |             | conserved hypothetical protein                       |
| Cluster_321570 | 2  | 8  | 18 | 9  | 10  | 47 | AI  | 4.66 | 0.0309 | 0.0234 |             | transposase family protein                           |
| Cluster_321885 | 0  | 4  | 20 | 13 | 0   | 24 | AI  | 3.12 | 0.0774 | 0.0360 |             | conserved hypothetical protein                       |
| Cluster_321886 | 0  | 4  | 20 | 13 | 0   | 24 | AI  | 3.12 | 0.0774 | 0.0360 |             | hNH endonuclease family protein                      |
| Cluster_322029 | 13 | 4  | 7  | 13 | 65  | 24 | NSI | 4.80 | 0.0284 | 0.0202 |             | hypothetical protein                                 |
| Cluster_324271 | 0  | 4  | 20 | 13 | 0   | 24 | AI  | 3.12 | 0.0774 | 0.0360 | <i>ssbF</i> | plasmid-derived single-stranded DNA-binding protein  |
| Cluster_325619 | 8  | 13 | 12 | 4  | 40  | 76 | AI  | 3.60 | 0.0576 | 0.0453 |             | aldehyde dehydrogenase family protein                |
| Cluster_325632 | 8  | 14 | 12 | 3  | 40  | 82 | AI  | 5.19 | 0.0227 | 0.0176 | <i>pduA</i> | propanediol utilization protein PduA                 |
| Cluster_326585 | 0  | 4  | 20 | 13 | 0   | 24 | AI  | 3.12 | 0.0774 | 0.0360 |             | putative protein TraJ                                |
| Cluster_331430 | 20 | 13 | 0  | 4  | 100 | 76 | NSI | 3.12 | 0.0774 | 0.0360 |             | conserved hypothetical protein                       |
| Cluster_337590 | 11 | 3  | 9  | 14 | 55  | 18 | NSI | 3.98 | 0.0461 | 0.0397 | <i>rop</i>  | regulatory protein rop                               |
| Cluster_34074  | 15 | 4  | 5  | 13 | 75  | 24 | NSI | 7.79 | 0.0052 | 0.0029 |             | lysis S family protein                               |
| Cluster_34159  | 10 | 2  | 10 | 15 | 50  | 12 | NSI | 4.51 | 0.0337 | 0.0173 |             | conserved hypothetical protein                       |
| Cluster_341964 | 9  | 14 | 11 | 3  | 45  | 82 | AI  | 3.98 | 0.0461 | 0.0397 |             | putative exonuclease VIII                            |
| Cluster_342342 | 13 | 5  | 7  | 12 | 65  | 29 | NSI | 3.34 | 0.0675 | 0.0489 |             | conserved hypothetical protein                       |
| Cluster_342343 | 13 | 5  | 7  | 12 | 65  | 29 | NSI | 3.34 | 0.0675 | 0.0489 |             | conserved hypothetical protein                       |
| Cluster_342345 | 13 | 4  | 7  | 13 | 65  | 24 | NSI | 4.80 | 0.0284 | 0.0202 |             | conserved hypothetical protein                       |
| Cluster_346896 | 8  | 1  | 12 | 16 | 40  | 6  | NSI | 4.11 | 0.0428 | 0.0227 |             | phage tail tape measure protein, lambda family       |
| Cluster_348887 | 7  | 1  | 13 | 16 | 35  | 6  | NSI | 3.04 | 0.0813 | 0.0481 |             | hypothetical protein                                 |
| Cluster_39298  | 11 | 16 | 9  | 1  | 55  | 94 | AI  | 5.28 | 0.0215 | 0.0102 |             | endodeoxyribonuclease RusA family protein            |
| Cluster_40501  | 8  | 13 | 12 | 4  | 40  | 76 | AI  | 3.60 | 0.0576 | 0.0453 |             | helix-turn-helix domain protein                      |
| Cluster_42758  | 8  | 14 | 12 | 3  | 40  | 82 | AI  | 5.19 | 0.0227 | 0.0176 |             | cob(I)alamin adenosyltransferase                     |
| Cluster_42763  | 8  | 14 | 12 | 3  | 40  | 82 | AI  | 5.19 | 0.0227 | 0.0176 | <i>pduA</i> | propanediol utilization protein PduA                 |
| Cluster_4527   | 19 | 10 | 1  | 7  | 95  | 59 | NSI | 5.12 | 0.0236 | 0.0140 |             | tail attachment protein                              |
| Cluster_46843  | 13 | 5  | 7  | 12 | 65  | 29 | NSI | 3.34 | 0.0675 | 0.0489 |             | dnaB-like helicase N terminal domain protein         |
| Cluster_46983  | 12 | 4  | 8  | 13 | 60  | 24 | NSI | 3.60 | 0.0576 | 0.0453 |             | conserved hypothetical protein                       |
| Cluster_4740   | 5  | 0  | 15 | 17 | 25  | 0  | NSI | 3.01 | 0.0829 | 0.0498 |             | marR family protein                                  |
| Cluster_4778   | 1  | 8  | 19 | 9  | 5   | 47 | AI  | 6.69 | 0.0097 | 0.0055 |             | conserved hypothetical protein                       |
| Cluster_4832   | 16 | 5  | 4  | 12 | 80  | 29 | NSI | 7.63 | 0.0057 | 0.0030 |             | DNA methylase family protein                         |
| Cluster_49147  | 6  | 0  | 14 | 17 | 30  | 0  | NSI | 4.08 | 0.0434 | 0.0220 |             | putative phage protein                               |
| Cluster_4962   | 18 | 9  | 2  | 8  | 90  | 53 | NSI | 4.66 | 0.0309 | 0.0234 |             | conserved hypothetical protein                       |
| Cluster_54451  | 5  | 10 | 15 | 7  | 25  | 59 | AI  | 3.07 | 0.0797 | 0.0498 |             | conserved hypothetical protein                       |
| Cluster_55403  | 4  | 10 | 16 | 7  | 20  | 59 | AI  | 4.35 | 0.0369 | 0.0210 |             | helix-turn-helix domain protein                      |
| Cluster_57003  | 4  | 10 | 16 | 7  | 20  | 59 | AI  | 4.35 | 0.0369 | 0.0210 |             | putative phage immunity repressor protein            |
| Cluster_59342  | 7  | 1  | 13 | 16 | 35  | 6  | NSI | 3.04 | 0.0813 | 0.0481 |             | conserved hypothetical protein                       |
| Cluster_64612  | 11 | 3  | 9  | 14 | 55  | 18 | NSI | 3.98 | 0.0461 | 0.0397 | <i>rop</i>  | regulatory protein rop                               |
| Cluster_6530   | 4  | 9  | 16 | 8  | 20  | 53 | AI  | 3.05 | 0.0808 | 0.0470 |             | putative exonuclease VIII                            |
| Cluster_70068  | 13 | 5  | 7  | 12 | 65  | 29 | NSI | 3.34 | 0.0675 | 0.0489 |             | conserved hypothetical protein                       |
| Cluster_73925  | 9  | 2  | 11 | 15 | 45  | 12 | NSI | 3.40 | 0.0653 | 0.0365 | <i>mbeA</i> | DNA relaxase MbeA                                    |
| Cluster_74390  | 9  | 2  | 11 | 15 | 45  | 12 | NSI | 3.40 | 0.0653 | 0.0365 |             | hypothetical protein                                 |
| Cluster_7621   | 6  | 0  | 14 | 17 | 30  | 0  | NSI | 4.08 | 0.0434 | 0.0220 |             | putative type III secretion Epr1 protein             |
| Cluster_79228  | 0  | 5  | 20 | 12 | 0   | 29 | AI  | 4.52 | 0.0335 | 0.0142 |             | conserved hypothetical protein                       |
| Cluster_7938   | 18 | 9  | 2  | 8  | 90  | 53 | NSI | 4.66 | 0.0309 | 0.0234 |             | DNA methylase family protein                         |
| Cluster_82167  | 7  | 1  | 13 | 16 | 35  | 6  | NSI | 3.04 | 0.0813 | 0.0481 |             | conserved hypothetical protein                       |
| Cluster_82579  | 6  | 13 | 14 | 4  | 30  | 76 | AI  | 6.19 | 0.0128 | 0.0081 | <i>espJ</i> | putative non-LEE-encoded effector EspJ               |
| Cluster_83701  | 0  | 4  | 20 | 13 | 0   | 24 | AI  | 3.12 | 0.0774 | 0.0360 |             | traP family protein                                  |
| Cluster_88753  | 14 | 5  | 6  | 12 | 70  | 29 | NSI | 4.54 | 0.0330 | 0.0217 |             | conserved hypothetical protein                       |
| Cluster_8918   | 0  | 4  | 20 | 13 | 0   | 24 | AI  | 3.12 | 0.0774 | 0.0360 | <i>ssbF</i> | plasmid-derived single-stranded DNA-binding protein  |
| Cluster_89529  | 5  | 10 | 15 | 7  | 25  | 59 | AI  | 3.07 | 0.0797 | 0.0498 |             | hypothetical protein                                 |
| Cluster_902    | 8  | 13 | 12 | 4  | 40  | 76 | AI  | 3.60 | 0.0576 | 0.0453 |             | outer membrane transport family protein              |
| Cluster_9782   | 5  | 10 | 15 | 7  | 25  | 59 | AI  | 3.07 | 0.0797 | 0.0498 |             | putative cytoplasmic protein                         |
| Cluster_99342  | 12 | 4  | 8  | 13 | 60  | 24 | NSI | 3.60 | 0.0576 | 0.0453 |             | putative aecB2                                       |

<sup>a</sup>Genes were grouped into gene clusters using a "stringent" clustering threshold of  $\geq 90\%$  nucleotide identity.

<sup>b</sup>Gene clusters identified as "present" have a TBLASTN LS-BSR  $\geq 0.9$ , while those that are "absent" have a TBLASTN LS-BSR  $< 0.9$ .

<sup>c</sup>Clinical outcomes are classified as lethal (LI), non-lethal symptomatic (NSI), and asymptomatic (AI).

**Table S4.** Genes identified by LS-BSR that are significantly correlated with symptomatic, asymptomatic, lethal, or non-lethal clinical outcomes for all 70 EPEC genomes analyzed using a stringent gene clustering threshold

| Cluster ID     | No. of Genomes                        |    | Percentage of Genomes Containing Cluster |    |          | Chi-squared test |           | Fisher's exact test | Gene ID | Predicted Protein Function |                                                        |         |
|----------------|---------------------------------------|----|------------------------------------------|----|----------|------------------|-----------|---------------------|---------|----------------------------|--------------------------------------------------------|---------|
|                | Present ( $\geq 0.9$ ) <sup>a,b</sup> |    | Absent ( $< 0.9$ ) <sup>a,b</sup>        |    | % LI+NSI | % AI             | Greater % | statistic           |         |                            | p-value                                                | p-value |
|                | LI+NSI                                | AI | LI+NSI                                   | AI |          |                  |           |                     |         |                            |                                                        |         |
| Cluster_34159  | 25                                    | 2  | 22                                       | 21 | 53       | 9                | LI+NSI    | 11.09               | 0.0009  | 0.0003                     | conserved hypothetical protein                         |         |
| Cluster_138051 | 35                                    | 7  | 12                                       | 16 | 74       | 30               | LI+NSI    | 10.71               | 0.0011  | 0.0006                     | lysis S family protein                                 |         |
| Cluster_266373 | 35                                    | 7  | 12                                       | 16 | 74       | 30               | LI+NSI    | 10.71               | 0.0011  | 0.0006                     | lysis S family protein                                 |         |
| Cluster_34074  | 35                                    | 7  | 12                                       | 16 | 74       | 30               | LI+NSI    | 10.71               | 0.0011  | 0.0006                     | lysis S family protein                                 |         |
| Cluster_74390  | 23                                    | 2  | 24                                       | 21 | 49       | 9                | LI+NSI    | 9.21                | 0.0024  | 0.0011                     | hypothetical protein                                   |         |
| Cluster_4527   | 43                                    | 13 | 4                                        | 10 | 91       | 57               | LI+NSI    | 9.72                | 0.0018  | 0.0012                     | tail attachment protein                                |         |
| Cluster_307965 | 25                                    | 3  | 22                                       | 20 | 53       | 13               | LI+NSI    | 8.77                | 0.0031  | 0.0016                     | traP family protein                                    |         |
| Cluster_88571  | 34                                    | 7  | 13                                       | 16 | 72       | 30               | LI+NSI    | 9.52                | 0.0020  | 0.0016                     | regulatory protein cro                                 |         |
| Cluster_322922 | 27                                    | 4  | 20                                       | 19 | 57       | 17               | LI+NSI    | 8.48                | 0.0036  | 0.0020                     | lysis S family protein                                 |         |
| Cluster_327168 | 33                                    | 7  | 14                                       | 16 | 70       | 30               | LI+NSI    | 8.42                | 0.0037  | 0.0022                     | helix-turn-helix domain protein                        |         |
| Cluster_272941 | 31                                    | 6  | 16                                       | 17 | 66       | 26               | LI+NSI    | 8.32                | 0.0039  | 0.0023                     | phage tail E family protein                            |         |
| Cluster_74420  | 31                                    | 6  | 16                                       | 17 | 66       | 26               | LI+NSI    | 8.32                | 0.0039  | 0.0023                     | conserved hypothetical protein                         |         |
| Cluster_12327  | 9                                     | 13 | 38                                       | 10 | 19       | 57               | AI        | 8.35                | 0.0039  | 0.0025                     | putative prophage protein                              |         |
| Cluster_169965 | 9                                     | 13 | 38                                       | 10 | 19       | 57               | AI        | 8.35                | 0.0039  | 0.0025                     | ogr/Delta-like zinc finger family protein              |         |
| Cluster_200453 | 9                                     | 13 | 38                                       | 10 | 19       | 57               | AI        | 8.35                | 0.0039  | 0.0025                     | putative derepression protein                          |         |
| Cluster_271578 | 9                                     | 13 | 38                                       | 10 | 19       | 57               | AI        | 8.35                | 0.0039  | 0.0025                     | conserved hypothetical protein                         |         |
| Cluster_55403  | 9                                     | 13 | 38                                       | 10 | 19       | 57               | AI        | 8.35                | 0.0039  | 0.0025                     | helix-turn-helix domain protein                        |         |
| Cluster_57003  | 9                                     | 13 | 38                                       | 10 | 19       | 57               | AI        | 8.35                | 0.0039  | 0.0025                     | putative phage immunity repressor protein              |         |
| Cluster_262069 | 21                                    | 2  | 26                                       | 21 | 45       | 9                | LI+NSI    | 7.51                | 0.0061  | 0.0027                     | istB-like ATP binding family protein                   |         |
| Cluster_289981 | 21                                    | 2  | 26                                       | 21 | 45       | 9                | LI+NSI    | 7.51                | 0.0061  | 0.0027                     | integrase core domain protein                          |         |
| Cluster_296966 | 0                                     | 5  | 47                                       | 18 | 0        | 22               | AI        | 7.97                | 0.0048  | 0.0028                     | conserved hypothetical protein                         |         |
| Cluster_310837 | 0                                     | 5  | 47                                       | 18 | 0        | 22               | AI        | 7.97                | 0.0048  | 0.0028                     | killing protein KiR                                    |         |
| Cluster_318890 | 0                                     | 5  | 47                                       | 18 | 0        | 22               | AI        | 7.97                | 0.0048  | 0.0028                     | nucleoside transporter family protein                  |         |
| Cluster_318894 | 0                                     | 5  | 47                                       | 18 | 0        | 22               | AI        | 7.97                | 0.0048  | 0.0028                     | lysR substrate binding domain protein                  |         |
| Cluster_147543 | 14                                    | 0  | 33                                       | 23 | 30       | 0                | LI+NSI    | 6.80                | 0.0091  | 0.0029                     | putative yfjA                                          |         |
| Cluster_237554 | 14                                    | 0  | 33                                       | 23 | 30       | 0                | LI+NSI    | 6.80                | 0.0091  | 0.0029                     | conserved hypothetical protein                         |         |
| Cluster_128567 | 42                                    | 13 | 5                                        | 10 | 89       | 57               | LI+NSI    | 8.04                | 0.0046  | 0.0038                     | phage portal protein, lambda family                    |         |
| Cluster_40177  | 42                                    | 13 | 5                                        | 10 | 89       | 57               | LI+NSI    | 8.04                | 0.0046  | 0.0038                     | major tail V domain protein                            |         |
| Cluster_78687  | 42                                    | 13 | 5                                        | 10 | 89       | 57               | LI+NSI    | 8.04                | 0.0046  | 0.0038                     | minor tail protein U                                   |         |
| Cluster_297448 | 21                                    | 19 | 26                                       | 4  | 45       | 83               | AI        | 7.59                | 0.0059  | 0.0042                     | conserved hypothetical protein                         |         |
| Cluster_127817 | 46                                    | 17 | 1                                        | 6  | 98       | 74               | LI+NSI    | 7.37                | 0.0066  | 0.0042                     | incFII family plasmid replication initiator RepA       |         |
| Cluster_178274 | 46                                    | 17 | 1                                        | 6  | 98       | 74               | LI+NSI    | 7.37                | 0.0066  | 0.0042                     | conserved hypothetical protein                         |         |
| Cluster_326414 | 1                                     | 6  | 46                                       | 17 | 2        | 26               | AI        | 7.37                | 0.0066  | 0.0042                     | dinI-like family protein                               |         |
| Cluster_103685 | 45                                    | 16 | 2                                        | 7  | 96       | 70               | LI+NSI    | 7.25                | 0.0071  | 0.0044                     | hypothetical protein                                   |         |
| Cluster_185869 | 2                                     | 7  | 45                                       | 16 | 4        | 30               | AI        | 7.25                | 0.0071  | 0.0044                     | transposase family protein                             |         |
| Cluster_316814 | 2                                     | 7  | 45                                       | 16 | 4        | 30               | AI        | 7.25                | 0.0071  | 0.0044                     | AAA domain protein                                     |         |
| Cluster_94384  | 45                                    | 16 | 2                                        | 7  | 96       | 70               | LI+NSI    | 7.25                | 0.0071  | 0.0044                     | transposase, Mutator family protein                    |         |
| Cluster_261591 | 32                                    | 7  | 15                                       | 16 | 68       | 30               | LI+NSI    | 7.41                | 0.0065  | 0.0045                     | methyltransferase domain protein                       |         |
| Cluster_68405  | 19                                    | 18 | 28                                       | 5  | 40       | 78               | AI        | 7.42                | 0.0065  | 0.0046                     | type-1 fibrillar protein, A chain                      |         |
| Cluster_342345 | 25                                    | 4  | 22                                       | 19 | 53       | 17               | LI+NSI    | 6.75                | 0.0094  | 0.0049                     | conserved hypothetical protein                         |         |
| Cluster_221391 | 20                                    | 2  | 27                                       | 21 | 43       | 9                | LI+NSI    | 6.72                | 0.0095  | 0.0054                     | conserved hypothetical protein                         |         |
| Cluster_108598 | 27                                    | 5  | 20                                       | 18 | 57       | 22               | LI+NSI    | 6.56                | 0.0104  | 0.0056                     | DNA-packaging protein FI                               |         |
| Cluster_14998  | 27                                    | 5  | 20                                       | 18 | 57       | 22               | LI+NSI    | 6.56                | 0.0104  | 0.0056                     | bacteriophage replication gene A family protein        |         |
| Cluster_70068  | 27                                    | 5  | 20                                       | 18 | 57       | 22               | LI+NSI    | 6.56                | 0.0104  | 0.0056                     | conserved hypothetical protein                         |         |
| Cluster_188375 | 37                                    | 10 | 10                                       | 13 | 79       | 43               | LI+NSI    | 7.17                | 0.0074  | 0.0060                     | phage major capsid E family protein                    |         |
| Cluster_276264 | 19                                    | 2  | 28                                       | 21 | 40       | 9                | LI+NSI    | 5.97                | 0.0146  | 0.0063                     | replication regulatory RepB family protein             |         |
| Cluster_108599 | 43                                    | 14 | 4                                        | 9  | 91       | 61               | LI+NSI    | 7.66                | 0.0057  | 0.0065                     | tail attachment protein                                |         |
| Cluster_237572 | 43                                    | 14 | 4                                        | 9  | 91       | 61               | LI+NSI    | 7.66                | 0.0057  | 0.0065                     | head decoration protein                                |         |
| Cluster_347409 | 41                                    | 13 | 6                                        | 10 | 87       | 57               | LI+NSI    | 6.61                | 0.0101  | 0.0065                     | phage tail sheath family protein                       |         |
| Cluster_59689  | 22                                    | 3  | 25                                       | 20 | 47       | 13               | LI+NSI    | 6.27                | 0.0123  | 0.0074                     | putative incFII replication protein RepA3              |         |
| Cluster_166870 | 36                                    | 10 | 11                                       | 13 | 77       | 43               | LI+NSI    | 6.12                | 0.0134  | 0.0083                     | integron integrase family protein                      |         |
| Cluster_248097 | 24                                    | 4  | 23                                       | 19 | 51       | 17               | LI+NSI    | 5.96                | 0.0146  | 0.0092                     | conserved hypothetical protein                         |         |
| Cluster_151647 | 42                                    | 14 | 5                                        | 9  | 89       | 61               | LI+NSI    | 6.16                | 0.0131  | 0.0094                     | phage major capsid E family protein                    |         |
| Cluster_294187 | 42                                    | 14 | 5                                        | 9  | 89       | 61               | LI+NSI    | 6.16                | 0.0131  | 0.0094                     | conserved hypothetical protein                         |         |
| Cluster_117195 | 47                                    | 19 | 0                                        | 4  | 100      | 83               | LI+NSI    | 5.74                | 0.0166  | 0.0097                     | conserved hypothetical protein                         |         |
| Cluster_168917 | 0                                     | 4  | 47                                       | 19 | 0        | 17               | AI        | 5.74                | 0.0166  | 0.0097                     | nucleoside 2-deoxyribosyltransferase family protein    |         |
| Cluster_171515 | 0                                     | 4  | 47                                       | 19 | 0        | 17               | AI        | 5.74                | 0.0166  | 0.0097                     | putative lipoprotein                                   |         |
| Cluster_171516 | 0                                     | 4  | 47                                       | 19 | 0        | 17               | AI        | 5.74                | 0.0166  | 0.0097                     | methyltransferase domain protein                       |         |
| Cluster_171517 | 0                                     | 4  | 47                                       | 19 | 0        | 17               | AI        | 5.74                | 0.0166  | 0.0097                     | beta-ketoacyl synthase, N-terminal domain protein      |         |
| Cluster_171518 | 0                                     | 4  | 47                                       | 19 | 0        | 17               | AI        | 5.74                | 0.0166  | 0.0097                     | acyltransferase family protein                         |         |
| Cluster_171521 | 0                                     | 4  | 47                                       | 19 | 0        | 17               | AI        | 5.74                | 0.0166  | 0.0097                     | putative membrane protein                              |         |
| Cluster_171522 | 0                                     | 4  | 47                                       | 19 | 0        | 17               | AI        | 5.74                | 0.0166  | 0.0097                     | AMP-binding enzyme family protein                      |         |
| Cluster_171524 | 0                                     | 4  | 47                                       | 19 | 0        | 17               | AI        | 5.74                | 0.0166  | 0.0097                     | glycosyl transferase 2 family protein                  |         |
| Cluster_171525 | 0                                     | 4  | 47                                       | 19 | 0        | 17               | AI        | 5.74                | 0.0166  | 0.0097                     | thioesterase-like superfamily protein                  |         |
| Cluster_171526 | 0                                     | 4  | 47                                       | 19 | 0        | 17               | AI        | 5.74                | 0.0166  | 0.0097                     | outer membrane lipocarrier LolA family protein         |         |
| Cluster_171527 | 0                                     | 4  | 47                                       | 19 | 0        | 17               | AI        | 5.74                | 0.0166  | 0.0097                     | MMP1 family protein                                    |         |
| Cluster_171529 | 0                                     | 4  | 47                                       | 19 | 0        | 17               | AI        | 5.74                | 0.0166  | 0.0097                     | beta-ketoacyl synthase, N-terminal domain protein      |         |
| Cluster_172243 | 0                                     | 4  | 47                                       | 19 | 0        | 17               | AI        | 5.74                | 0.0166  | 0.0097                     | phage integrase family protein                         |         |
| Cluster_193190 | 47                                    | 19 | 0                                        | 4  | 100      | 83               | LI+NSI    | 5.74                | 0.0166  | 0.0097                     | nlpC/P60 family protein                                |         |
| Cluster_206025 | 0                                     | 4  | 47                                       | 19 | 0        | 17               | AI        | 5.74                | 0.0166  | 0.0097                     | phosphopantetheine attachment site family protein      |         |
| Cluster_206026 | 0                                     | 4  | 47                                       | 19 | 0        | 17               | AI        | 5.74                | 0.0166  | 0.0097                     | phosphopantetheine attachment site family protein      |         |
| Cluster_206029 | 0                                     | 4  | 47                                       | 19 | 0        | 17               | AI        | 5.74                | 0.0166  | 0.0097                     | conserved hypothetical protein                         |         |
| Cluster_206034 | 0                                     | 4  | 47                                       | 19 | 0        | 17               | AI        | 5.74                | 0.0166  | 0.0097                     | conserved hypothetical protein                         |         |
| Cluster_206036 | 0                                     | 4  | 47                                       | 19 | 0        | 17               | AI        | 5.74                | 0.0166  | 0.0097                     | fabA-like domain protein                               |         |
| Cluster_206037 | 0                                     | 4  | 47                                       | 19 | 0        | 17               | AI        | 5.74                | 0.0166  | 0.0097                     | KR domain protein                                      |         |
| Cluster_206038 | 0                                     | 4  | 47                                       | 19 | 0        | 17               | AI        | 5.74                | 0.0166  | 0.0097                     | beta-ketoacyl synthase, N-terminal domain protein      |         |
| Cluster_206099 | 0                                     | 4  | 47                                       | 19 | 0        | 17               | AI        | 5.74                | 0.0166  | 0.0097                     | conserved hypothetical protein                         |         |
| Cluster_207740 | 0                                     | 4  | 47                                       | 19 | 0        | 17               | AI        | 5.74                | 0.0166  | 0.0097                     | caudovirales tail fibre assembly family protein        |         |
| Cluster_321885 | 0                                     | 4  | 47                                       | 19 | 0        | 17               | AI        | 5.74                | 0.0166  | 0.0097                     | conserved hypothetical protein                         |         |
| Cluster_321886 | 0                                     | 4  | 47                                       | 19 | 0        | 17               | AI        | 5.74                | 0.0166  | 0.0097                     | hNH endonuclease family protein                        |         |
| Cluster_331430 | 47                                    | 19 | 0                                        | 4  | 100      | 83               | LI+NSI    | 5.74                | 0.0166  | 0.0097                     | conserved hypothetical protein                         |         |
| Cluster_341403 | 47                                    | 19 | 0                                        | 4  | 100      | 83               | LI+NSI    | 5.74                | 0.0166  | 0.0097                     | lyx                                                    |         |
| Cluster_345362 | 47                                    | 19 | 0                                        | 4  | 100      | 83               | LI+NSI    | 5.74                | 0.0166  | 0.0097                     | araD                                                   |         |
| Cluster_72173  | 47                                    | 19 | 0                                        | 4  | 100      | 83               | LI+NSI    | 5.74                | 0.0166  | 0.0097                     | L-xylulose/3-keto-L-gulonate kinase                    |         |
| Cluster_78310  | 47                                    | 19 | 0                                        | 4  | 100      | 83               | LI+NSI    | 5.74                | 0.0166  | 0.0097                     | L-ribulose-5-phosphate 4-epimerase                     |         |
| Cluster_221813 | 34                                    | 9  | 13                                       | 14 | 72       | 39               | LI+NSI    | 5.86                | 0.0155  | 0.0098                     | xylose isomerase-like TIM barrel family protein        |         |
| Cluster_264826 | 34                                    | 9  | 13                                       | 14 | 72       | 39               | LI+NSI    | 5.86                | 0.0155  | 0.0098                     | peptidase M23 family protein                           |         |
| Cluster_225861 | 8                                     | 11 | 39                                       | 12 | 17       | 48               | AI        | 5.93                | 0.0148  | 0.0100                     | conserved hypothetical protein                         |         |
| Cluster_20103  | 29                                    | 6  | 18                                       | 17 | 62       | 26               | LI+NSI    | 6.48                | 0.0109  | 0.0101                     | yagB/YeeU/YfjZ family protein                          |         |
| Cluster_342998 | 29                                    | 6  | 18                                       | 17 | 62       | 26               | LI+NSI    | 6.48                | 0.0109  | 0.0101                     | polarity suppression protein                           |         |
| Cluster_103416 | 26                                    | 5  | 21                                       | 18 | 55       | 22               | LI+NSI    | 5.76                | 0.0164  | 0.0105                     | outer membrane transport family protein                |         |
| Cluster_248119 | 26                                    | 5  | 21                                       | 18 | 55       | 22               | LI+NSI    | 5.76                | 0.0164  | 0.0105                     | phage tail protein I                                   |         |
| Cluster_302692 | 26                                    | 5  | 21                                       | 18 | 55       | 22               | LI+NSI    | 5.76                | 0.0164  | 0.0105                     | conserved hypothetical protein                         |         |
| Cluster_325003 | 21                                    | 18 | 26                                       | 5  | 45       | 78               | AI        | 5.76                | 0.0164  | 0.0105                     | dnaB-like helicase N terminal domain protein           |         |
| Cluster_342342 | 26                                    | 5  | 21                                       | 18 | 55       | 22               | LI+NSI    | 5.76                | 0.0164  | 0.0105                     | hypothetical protein                                   |         |
| Cluster_342343 | 26                                    | 5  | 21                                       | 18 | 55       | 22               | LI+NSI    | 5.76                | 0.0164  | 0.0105                     | conserved hypothetical protein                         |         |
| Cluster_46843  | 26                                    | 5  | 21                                       | 18 | 55       | 22               | LI+NSI    | 5.76                | 0.0164  | 0.0105                     | conserved hypothetical protein                         |         |
| Cluster_145816 | 9                                     | 12 | 38                                       | 11 | 19       | 52               | AI        | 6.52                | 0.0106  | 0.0111                     | dnaB-like helicase N terminal domain protein           |         |
|                |                                       |    |                                          |    |          |                  |           |                     |         |                            | putative glyco3, capsid size determination protein Sid |         |



|                |    |    |    |    |    |     |        |      |        |        |                                                                             |
|----------------|----|----|----|----|----|-----|--------|------|--------|--------|-----------------------------------------------------------------------------|
| Cluster_203385 | 9  | 12 | 38 | 11 | 19 | 52  | AI     | 6.52 | 0.0106 | 0.0111 | conserved hypothetical family protein                                       |
| Cluster_267179 | 38 | 11 | 9  | 12 | 81 | 48  | LI+NSI | 6.52 | 0.0106 | 0.0111 | conserved hypothetical protein                                              |
| Cluster_109753 | 17 | 16 | 30 | 7  | 36 | 70  | AI     | 5.64 | 0.0176 | 0.0113 | outer membrane transport family protein                                     |
| Cluster_902    | 17 | 16 | 30 | 7  | 36 | 70  | AI     | 5.64 | 0.0176 | 0.0113 | outer membrane transport family protein                                     |
| Cluster_118881 | 44 | 16 | 3  | 7  | 94 | 70  | LI+NSI | 5.46 | 0.0194 | 0.0115 | transposase, Mutator family protein                                         |
| Cluster_8918   | 3  | 7  | 44 | 16 | 6  | 30  | AI     | 5.46 | 0.0194 | 0.0115 | plasmid-derived single-stranded DNA-binding protein                         |
| Cluster_44635  | 36 | 23 | 11 | 0  | 77 | 100 | AI     | 4.74 | 0.0294 | 0.0122 | type III secretion. HrpO family protein                                     |
| Cluster_173657 | 1  | 5  | 46 | 18 | 2  | 22  | AI     | 5.28 | 0.0215 | 0.0128 | conserved hypothetical protein                                              |
| Cluster_191931 | 1  | 5  | 46 | 18 | 2  | 22  | AI     | 5.28 | 0.0215 | 0.0128 | lysR substrate binding domain protein                                       |
| Cluster_191933 | 1  | 5  | 46 | 18 | 2  | 22  | AI     | 5.28 | 0.0215 | 0.0128 | 3-oxoacid CoA-transferase, B subunit                                        |
| Cluster_191934 | 1  | 5  | 46 | 18 | 2  | 22  | AI     | 5.28 | 0.0215 | 0.0128 | acetyl-CoA C-acetyltransferase family protein                               |
| Cluster_191935 | 1  | 5  | 46 | 18 | 2  | 22  | AI     | 5.28 | 0.0215 | 0.0128 | 3-hydroxyacyl-CoA dehydrogenase, NAD binding domain protein                 |
| Cluster_210976 | 2  | 6  | 45 | 17 | 4  | 26  | AI     | 5.27 | 0.0216 | 0.0128 | putative prophage protein                                                   |
| Cluster_2127   | 1  | 5  | 46 | 18 | 2  | 22  | AI     | 5.28 | 0.0215 | 0.0128 | 3-hydroxybutyrate dehydrogenase family protein                              |
| Cluster_230986 | 2  | 6  | 45 | 17 | 4  | 26  | AI     | 5.27 | 0.0216 | 0.0128 | glucose-1-phosphate thymidyltransferase                                     |
| Cluster_234924 | 46 | 18 | 1  | 5  | 98 | 78  | LI+NSI | 5.28 | 0.0215 | 0.0128 | orn/Lys/Arg decarboxylase, C-terminal domain protein                        |
| Cluster_247805 | 46 | 18 | 1  | 5  | 98 | 78  | LI+NSI | 5.28 | 0.0215 | 0.0128 | glucosamine-6-phosphate isomerases/6-phosphogluconolactonase family protein |
| Cluster_316170 | 2  | 6  | 45 | 17 | 4  | 26  | AI     | 5.27 | 0.0216 | 0.0128 | putative predicted protein                                                  |
| Cluster_316818 | 2  | 6  | 45 | 17 | 4  | 26  | AI     | 5.27 | 0.0216 | 0.0128 | putative predicted protein                                                  |
| Cluster_324271 | 2  | 6  | 45 | 17 | 4  | 26  | AI     | 5.27 | 0.0216 | 0.0128 | ssbF plasmid-derived single-stranded DNA-binding protein                    |
| Cluster_3723   | 2  | 6  | 45 | 17 | 4  | 26  | AI     | 5.27 | 0.0216 | 0.0128 | conserved hypothetical protein                                              |
| Cluster_38989  | 1  | 5  | 46 | 18 | 2  | 22  | AI     | 5.28 | 0.0215 | 0.0128 | conserved hypothetical protein                                              |
| Cluster_49492  | 1  | 5  | 46 | 18 | 2  | 22  | AI     | 5.28 | 0.0215 | 0.0128 | acetyltransferase family protein                                            |
| Cluster_50317  | 1  | 5  | 46 | 18 | 2  | 22  | AI     | 5.28 | 0.0215 | 0.0128 | conserved hypothetical protein                                              |
| Cluster_51720  | 1  | 5  | 46 | 18 | 2  | 22  | AI     | 5.28 | 0.0215 | 0.0128 | 3-oxoacid CoA-transferase, A subunit                                        |
| Cluster_51724  | 1  | 5  | 46 | 18 | 2  | 22  | AI     | 5.28 | 0.0215 | 0.0128 | citrate transporter family protein                                          |
| Cluster_7049   | 1  | 5  | 46 | 18 | 2  | 22  | AI     | 5.28 | 0.0215 | 0.0128 | conserved hypothetical protein                                              |
| Cluster_79228  | 1  | 5  | 46 | 18 | 2  | 22  | AI     | 5.28 | 0.0215 | 0.0128 | conserved hypothetical protein                                              |
| Cluster_271379 | 32 | 22 | 15 | 1  | 68 | 96  | AI     | 5.18 | 0.0228 | 0.0135 | glycosyl hydrolase family 65, N-terminal domain protein                     |
| Cluster_137907 | 10 | 12 | 37 | 11 | 21 | 52  | AI     | 5.48 | 0.0192 | 0.0135 | hypothetical protein                                                        |
| Cluster_321224 | 4  | 8  | 43 | 15 | 9  | 35  | AI     | 5.77 | 0.0163 | 0.0145 | conserved hypothetical protein                                              |
| Cluster_118990 | 14 | 1  | 33 | 22 | 30 | 4   | LI+NSI | 4.52 | 0.0335 | 0.0147 | conserved hypothetical protein                                              |
| Cluster_128383 | 14 | 1  | 33 | 22 | 30 | 4   | LI+NSI | 4.52 | 0.0335 | 0.0147 | conserved hypothetical protein                                              |
| Cluster_14537  | 14 | 1  | 33 | 22 | 30 | 4   | LI+NSI | 4.52 | 0.0335 | 0.0147 | conserved hypothetical protein                                              |
| Cluster_222761 | 14 | 1  | 33 | 22 | 30 | 4   | LI+NSI | 4.52 | 0.0335 | 0.0147 | viral (Super1) RNA helicase family protein                                  |
| Cluster_261666 | 14 | 1  | 33 | 22 | 30 | 4   | LI+NSI | 4.52 | 0.0335 | 0.0147 | putative escherichia coli chi7122 chi7122 genomic chromosome, chi7122       |
| Cluster_276697 | 14 | 1  | 33 | 22 | 30 | 4   | LI+NSI | 4.52 | 0.0335 | 0.0147 | AAA domain protein                                                          |
| Cluster_292258 | 14 | 1  | 33 | 22 | 30 | 4   | LI+NSI | 4.52 | 0.0335 | 0.0147 | conserved hypothetical protein                                              |
| Cluster_59324  | 14 | 1  | 33 | 22 | 30 | 4   | LI+NSI | 4.52 | 0.0335 | 0.0147 | conserved hypothetical protein                                              |
| Cluster_73497  | 14 | 1  | 33 | 22 | 30 | 4   | LI+NSI | 4.52 | 0.0335 | 0.0147 | putative acetyltransferase                                                  |
| Cluster_226889 | 7  | 10 | 40 | 13 | 15 | 43  | AI     | 5.40 | 0.0202 | 0.0160 | conserved hypothetical protein                                              |
| Cluster_330511 | 40 | 13 | 7  | 10 | 85 | 57  | LI+NSI | 5.40 | 0.0202 | 0.0160 | putative P4-specific DNA primase                                            |
| Cluster_53578  | 40 | 13 | 7  | 10 | 85 | 57  | LI+NSI | 5.40 | 0.0202 | 0.0160 | phage major tail tube protein                                               |
| Cluster_275878 | 35 | 10 | 12 | 13 | 74 | 43  | LI+NSI | 5.18 | 0.0228 | 0.0167 | putative protein                                                            |
| Cluster_103347 | 23 | 4  | 24 | 19 | 49 | 17  | LI+NSI | 5.22 | 0.0223 | 0.0176 | lysR substrate binding domain protein                                       |
| Cluster_309396 | 23 | 4  | 24 | 19 | 49 | 17  | LI+NSI | 5.22 | 0.0223 | 0.0176 | conserved hypothetical protein                                              |
| Cluster_157040 | 33 | 9  | 14 | 14 | 70 | 39  | LI+NSI | 4.99 | 0.0255 | 0.0191 | conserved hypothetical protein                                              |
| Cluster_266630 | 22 | 4  | 25 | 19 | 47 | 17  | LI+NSI | 4.53 | 0.0332 | 0.0194 | methyltransferase domain protein                                            |
| Cluster_202509 | 25 | 5  | 22 | 18 | 53 | 22  | LI+NSI | 5.02 | 0.0251 | 0.0198 | conserved hypothetical protein                                              |
| Cluster_267342 | 25 | 5  | 22 | 18 | 53 | 22  | LI+NSI | 5.02 | 0.0251 | 0.0198 | transposase C of IS166 homeodomain protein                                  |
| Cluster_281686 | 25 | 5  | 22 | 18 | 53 | 22  | LI+NSI | 5.02 | 0.0251 | 0.0198 | putative bacteriophage protein                                              |
| Cluster_82579  | 20 | 17 | 27 | 6  | 43 | 74  | AI     | 4.90 | 0.0268 | 0.0211 | conserved hypothetical protein                                              |
| Cluster_82835  | 27 | 6  | 20 | 17 | 57 | 26  | LI+NSI | 4.90 | 0.0268 | 0.0211 | putative non-LEE-encoded effector EspJ                                      |
| Cluster_11588  | 5  | 8  | 42 | 15 | 11 | 35  | AI     | 4.46 | 0.0346 | 0.0223 | conserved hypothetical protein                                              |
| Cluster_147672 | 42 | 15 | 5  | 8  | 89 | 65  | LI+NSI | 4.46 | 0.0346 | 0.0223 | terminase small subunit                                                     |
| Cluster_210977 | 5  | 8  | 42 | 15 | 11 | 35  | AI     | 4.46 | 0.0346 | 0.0223 | conserved hypothetical protein                                              |
| Cluster_210978 | 5  | 8  | 42 | 15 | 11 | 35  | AI     | 4.46 | 0.0346 | 0.0223 | conserved hypothetical protein                                              |
| Cluster_21749  | 42 | 15 | 5  | 8  | 89 | 65  | LI+NSI | 4.46 | 0.0346 | 0.0223 | conserved hypothetical protein                                              |
| Cluster_225286 | 5  | 8  | 42 | 15 | 11 | 35  | AI     | 4.46 | 0.0346 | 0.0223 | RHS Repeat family protein                                                   |
| Cluster_326026 | 5  | 8  | 42 | 15 | 11 | 35  | AI     | 4.46 | 0.0346 | 0.0223 | fimbrial family protein                                                     |
| Cluster_39211  | 42 | 15 | 5  | 8  | 89 | 65  | LI+NSI | 4.46 | 0.0346 | 0.0223 | transposase family protein                                                  |
| Cluster_217504 | 24 | 5  | 23 | 18 | 51 | 22  | LI+NSI | 4.33 | 0.0374 | 0.0224 | istB-like ATP binding family protein                                        |
| Cluster_232396 | 9  | 11 | 38 | 12 | 19 | 48  | AI     | 4.90 | 0.0269 | 0.0227 | putative dNA-binding helix-turn-helix protein                               |
| Cluster_4778   | 9  | 11 | 38 | 12 | 19 | 48  | AI     | 4.90 | 0.0269 | 0.0227 | conserved hypothetical protein                                              |
| Cluster_7938   | 38 | 12 | 9  | 11 | 81 | 52  | LI+NSI | 4.90 | 0.0269 | 0.0227 | DNA methylase family protein                                                |
| Cluster_153717 | 8  | 10 | 39 | 13 | 17 | 43  | AI     | 4.36 | 0.0368 | 0.0228 | lipopolysaccharide core heptose(II) kinase RfaY                             |
| Cluster_221865 | 39 | 13 | 8  | 10 | 83 | 57  | LI+NSI | 4.36 | 0.0368 | 0.0228 | bacterial type II and III secretion system family protein                   |
| Cluster_261646 | 39 | 13 | 8  | 10 | 83 | 57  | LI+NSI | 4.36 | 0.0368 | 0.0228 | phage/conjugal plasmid C-4 type zinc finger, TraR family protein            |
| Cluster_297203 | 8  | 10 | 39 | 13 | 17 | 43  | AI     | 4.36 | 0.0368 | 0.0228 | conserved hypothetical protein                                              |
| Cluster_31976  | 8  | 10 | 39 | 13 | 17 | 43  | AI     | 4.36 | 0.0368 | 0.0228 | lipopolysaccharide core heptose(II) kinase RfaY                             |
| Cluster_82353  | 39 | 13 | 8  | 10 | 83 | 57  | LI+NSI | 4.36 | 0.0368 | 0.0228 | conserved hypothetical protein                                              |
| Cluster_104053 | 26 | 6  | 21 | 17 | 55 | 26  | LI+NSI | 4.20 | 0.0403 | 0.0244 | phage late control gene D family protein                                    |
| Cluster_183342 | 21 | 17 | 26 | 6  | 45 | 74  | AI     | 4.20 | 0.0403 | 0.0244 | conserved hypothetical protein                                              |
| Cluster_242117 | 26 | 6  | 21 | 17 | 55 | 26  | LI+NSI | 4.20 | 0.0403 | 0.0244 | hypothetical protein                                                        |
| Cluster_261668 | 26 | 6  | 21 | 17 | 55 | 26  | LI+NSI | 4.20 | 0.0403 | 0.0244 | antidote-toxin recognition MazE family protein                              |
| Cluster_347632 | 26 | 6  | 21 | 17 | 55 | 26  | LI+NSI | 4.20 | 0.0403 | 0.0244 | antidote-toxin recognition MazE family protein                              |
| Cluster_108649 | 9  | 0  | 38 | 23 | 19 | 0   | LI+NSI | 3.49 | 0.0618 | 0.0254 | antidote-toxin recognition MazE family protein                              |
| Cluster_108651 | 9  | 0  | 38 | 23 | 19 | 0   | LI+NSI | 3.49 | 0.0618 | 0.0254 | conserved hypothetical protein                                              |
| Cluster_114891 | 9  | 0  | 38 | 23 | 19 | 0   | LI+NSI | 3.49 | 0.0618 | 0.0254 | conserved hypothetical protein                                              |
| Cluster_119046 | 9  | 0  | 38 | 23 | 19 | 0   | LI+NSI | 3.49 | 0.0618 | 0.0254 | conserved hypothetical protein                                              |
| Cluster_125122 | 9  | 0  | 38 | 23 | 19 | 0   | LI+NSI | 3.49 | 0.0618 | 0.0254 | putative tail fiber protein                                                 |
| Cluster_127445 | 9  | 0  | 38 | 23 | 19 | 0   | LI+NSI | 3.49 | 0.0618 | 0.0254 | putative predicted protein                                                  |
| Cluster_131841 | 38 | 23 | 9  | 0  | 81 | 100 | AI     | 3.49 | 0.0618 | 0.0254 | conserved hypothetical protein                                              |
| Cluster_152085 | 9  | 0  | 38 | 23 | 19 | 0   | LI+NSI | 3.49 | 0.0618 | 0.0254 | fructose-like permease IIC component 1                                      |
| Cluster_163907 | 9  | 0  | 38 | 23 | 19 | 0   | LI+NSI | 3.49 | 0.0618 | 0.0254 | conserved hypothetical protein                                              |
| Cluster_163983 | 9  | 0  | 38 | 23 | 19 | 0   | LI+NSI | 3.49 | 0.0618 | 0.0254 | conserved hypothetical protein                                              |
| Cluster_164950 | 9  | 0  | 38 | 23 | 19 | 0   | LI+NSI | 3.49 | 0.0618 | 0.0254 | glycosyltransferase Family 4 family protein                                 |
| Cluster_166190 | 9  | 0  | 38 | 23 | 19 | 0   | LI+NSI | 3.49 | 0.0618 | 0.0254 | conserved hypothetical protein                                              |
| Cluster_239410 | 9  | 0  | 38 | 23 | 19 | 0   | LI+NSI | 3.49 | 0.0618 | 0.0254 | UTRA domain protein                                                         |
| Cluster_261875 | 9  | 0  | 38 | 23 | 19 | 0   | LI+NSI | 3.49 | 0.0618 | 0.0254 | phage integrase family protein                                              |
| Cluster_262139 | 9  | 0  | 38 | 23 | 19 | 0   | LI+NSI | 3.49 | 0.0618 | 0.0254 | bacteriophage replication gene A family protein                             |
| Cluster_263945 | 9  | 0  | 38 | 23 | 19 | 0   | LI+NSI | 3.49 | 0.0618 | 0.0254 | hypothetical protein                                                        |
| Cluster_263946 | 9  | 0  | 38 | 23 | 19 | 0   | LI+NSI | 3.49 | 0.0618 | 0.0254 | conserved hypothetical protein                                              |
| Cluster_263948 | 9  | 0  | 38 | 23 | 19 | 0   | LI+NSI | 3.49 | 0.0618 | 0.0254 | conserved hypothetical protein                                              |
| Cluster_263949 | 9  | 0  | 38 | 23 | 19 | 0   | LI+NSI | 3.49 | 0.0618 | 0.0254 | phage major capsid E family protein                                         |
| Cluster_266287 | 9  | 0  | 38 | 23 | 19 | 0   | LI+NSI | 3.49 | 0.0618 | 0.0254 | conserved hypothetical protein                                              |
| Cluster_272862 | 9  | 0  | 38 | 23 | 19 | 0   | LI+NSI | 3.49 | 0.0618 | 0.0254 | hypothetical protein                                                        |
| Cluster_291165 | 9  | 0  | 38 | 23 | 19 | 0   | LI+NSI | 3.49 | 0.0618 | 0.0254 | helix-turn-helix domain protein                                             |
| Cluster_291297 | 9  | 0  | 38 | 23 | 19 | 0   | LI+NSI | 3.49 | 0.0618 | 0.0254 | phage integrase family protein                                              |
| Cluster_345268 | 38 | 23 | 9  | 0  | 81 | 100 | AI     | 3.49 | 0.0618 | 0.0254 | glycosyl transferase 2 family protein                                       |
| Cluster_49147  | 9  | 0  | 38 | 23 | 19 | 0   | LI+NSI | 3.49 | 0.0618 | 0.0254 | fructose-like permease IIC component 1                                      |
| Cluster_69484  | 9  | 0  | 38 | 23 | 19 | 0   | LI+NSI | 3.49 | 0.0618 | 0.0254 | putative phage protein                                                      |
| Cluster_69487  | 9  | 0  | 38 | 23 | 19 | 0   | LI+NSI | 3.49 | 0.0618 | 0.0254 | DNA N-6-adenine-methyltransferase family protein                            |
| Cluster_69489  | 9  | 0  | 38 | 23 | 19 | 0   | LI+NSI | 3.49 | 0.0618 | 0.0254 | conserved hypothetical protein                                              |
| Cluster_71993  | 9  | 0  | 38 | 23 | 19 | 0   | LI+NSI | 3.49 | 0.0618 | 0.0254 | conserved hypothetical protein                                              |
|                |    |    |    |    |    |     |        |      |        |        | putative membrane protein                                                   |

| Cluster ID     | 9  | 0  | 38 | 23 | 19  | 0  | LI+NSI | 3.49 | 0.0618 | 0.0254 |                                                                                    |
|----------------|----|----|----|----|-----|----|--------|------|--------|--------|------------------------------------------------------------------------------------|
| Cluster_71994  | 9  | 0  | 38 | 23 | 19  | 0  | LI+NSI | 3.49 | 0.0618 | 0.0254 | glycosyl transferase 11 family protein                                             |
| Cluster_71995  | 9  | 0  | 38 | 23 | 19  | 0  | LI+NSI | 3.49 | 0.0618 | 0.0254 | phosphoglucomutase/phosphomannomutase, alpha/beta/alpha domain III family protein  |
| Cluster_71996  | 9  | 0  | 38 | 23 | 19  | 0  | LI+NSI | 3.49 | 0.0618 | 0.0254 | mannose-1-phosphate guanylyltransferase/mannose-6-phosphate isomerase              |
| Cluster_72685  | 9  | 0  | 38 | 23 | 19  | 0  | LI+NSI | 3.49 | 0.0618 | 0.0254 | hypothetical protein                                                               |
| Cluster_73386  | 9  | 0  | 38 | 23 | 19  | 0  | LI+NSI | 3.49 | 0.0618 | 0.0254 | caudovirales tail fibre assembly family protein                                    |
| Cluster_73840  | 9  | 0  | 38 | 23 | 19  | 0  | LI+NSI | 3.49 | 0.0618 | 0.0254 | conserved hypothetical protein                                                     |
| Cluster_103412 | 13 | 1  | 34 | 22 | 28  | 4  | LI+NSI | 3.89 | 0.0486 | 0.0262 | repressor protein C2                                                               |
| Cluster_17854  | 13 | 1  | 34 | 22 | 28  | 4  | LI+NSI | 3.89 | 0.0486 | 0.0262 | conserved hypothetical protein                                                     |
| Cluster_201731 | 13 | 1  | 34 | 22 | 28  | 4  | LI+NSI | 3.89 | 0.0486 | 0.0262 | helix-turn-helix, Pqs domain protein                                               |
| Cluster_201738 | 13 | 1  | 34 | 22 | 28  | 4  | LI+NSI | 3.89 | 0.0486 | 0.0262 | conserved hypothetical protein                                                     |
| Cluster_267010 | 13 | 1  | 34 | 22 | 28  | 4  | LI+NSI | 3.89 | 0.0486 | 0.0262 | putative pcar                                                                      |
| Cluster_281878 | 13 | 1  | 34 | 22 | 28  | 4  | LI+NSI | 3.89 | 0.0486 | 0.0262 | helix-turn-helix domain protein                                                    |
| Cluster_48960  | 13 | 1  | 34 | 22 | 28  | 4  | LI+NSI | 3.89 | 0.0486 | 0.0262 | conserved hypothetical protein                                                     |
| Cluster_173601 | 41 | 14 | 6  | 9  | 87  | 61 | LI+NSI | 4.91 | 0.0268 | 0.0269 | <i>folP</i>                                                                        |
| Cluster_198519 | 6  | 9  | 41 | 14 | 13  | 39 | AI     | 4.91 | 0.0268 | 0.0269 | dihydropteroate synthase                                                           |
| Cluster_268703 | 6  | 9  | 41 | 14 | 13  | 39 | AI     | 4.91 | 0.0268 | 0.0269 | transposase family protein                                                         |
| Cluster_276834 | 41 | 14 | 6  | 9  | 87  | 61 | LI+NSI | 4.91 | 0.0268 | 0.0269 | <i>espJ</i>                                                                        |
| Cluster_343399 | 41 | 14 | 6  | 9  | 87  | 61 | LI+NSI | 4.91 | 0.0268 | 0.0269 | putative non-LEE-encoded effector EspJ                                             |
| Cluster_108011 | 19 | 3  | 28 | 20 | 40  | 13 | LI+NSI | 4.18 | 0.0410 | 0.0279 | clp protease family protein                                                        |
| Cluster_11079  | 28 | 20 | 19 | 3  | 60  | 87 | AI     | 4.18 | 0.0410 | 0.0279 | phase P2 GpU family protein                                                        |
| Cluster_178309 | 19 | 3  | 28 | 20 | 40  | 13 | LI+NSI | 4.18 | 0.0410 | 0.0279 | <i>traN</i>                                                                        |
| Cluster_72094  | 19 | 3  | 28 | 20 | 40  | 13 | LI+NSI | 4.18 | 0.0410 | 0.0279 | type-F conjugative transfer system mating-pair stabilization protein TraN          |
| Cluster_292597 | 36 | 11 | 11 | 12 | 77  | 48 | LI+NSI | 4.56 | 0.0327 | 0.0288 | transglycosylase SLT domain protein                                                |
| Cluster_347183 | 36 | 11 | 11 | 12 | 77  | 48 | LI+NSI | 4.56 | 0.0327 | 0.0288 | conserved hypothetical protein                                                     |
| Cluster_151023 | 10 | 11 | 37 | 12 | 21  | 48 | AI     | 4.00 | 0.0456 | 0.0292 | phage integrase family protein                                                     |
| Cluster_271719 | 10 | 11 | 37 | 12 | 21  | 48 | AI     | 4.00 | 0.0456 | 0.0292 | bacteriophage lambda tail assembly I family protein                                |
| Cluster_3745   | 10 | 11 | 37 | 12 | 21  | 48 | AI     | 4.00 | 0.0456 | 0.0292 | small Multidrug Resistance family protein                                          |
| Cluster_115550 | 47 | 20 | 0  | 3  | 100 | 87 | LI+NSI | 3.62 | 0.0571 | 0.0324 | conserved hypothetical protein                                                     |
| Cluster_1253   | 0  | 3  | 47 | 20 | 0   | 13 | AI     | 3.62 | 0.0571 | 0.0324 | aminotransferase class I and II family protein                                     |
| Cluster_130922 | 47 | 20 | 0  | 3  | 100 | 87 | LI+NSI | 3.62 | 0.0571 | 0.0324 | <i>iciA</i>                                                                        |
| Cluster_1317   | 0  | 3  | 47 | 20 | 0   | 13 | AI     | 3.62 | 0.0571 | 0.0324 | chromosome initiation inhibitor                                                    |
| Cluster_133750 | 47 | 20 | 0  | 3  | 100 | 87 | LI+NSI | 3.62 | 0.0571 | 0.0324 | glycosyl transferases group 1 family protein                                       |
| Cluster_134672 | 47 | 20 | 0  | 3  | 100 | 87 | LI+NSI | 3.62 | 0.0571 | 0.0324 | <i>cptA</i>                                                                        |
| Cluster_141879 | 47 | 20 | 0  | 3  | 100 | 87 | LI+NSI | 3.62 | 0.0571 | 0.0324 | toxin CptA                                                                         |
| Cluster_151507 | 47 | 20 | 0  | 3  | 100 | 87 | LI+NSI | 3.62 | 0.0571 | 0.0324 | phage tail-coilar fibre family protein                                             |
| Cluster_152658 | 47 | 20 | 0  | 3  | 100 | 87 | LI+NSI | 3.62 | 0.0571 | 0.0324 | VWA domain containing CoxE-like family protein                                     |
| Cluster_170088 | 0  | 3  | 47 | 20 | 0   | 13 | AI     | 3.62 | 0.0571 | 0.0324 | <i>prfB</i>                                                                        |
| Cluster_171551 | 0  | 3  | 47 | 20 | 0   | 13 | AI     | 3.62 | 0.0571 | 0.0324 | peptide chain release factor 2                                                     |
| Cluster_171552 | 0  | 3  | 47 | 20 | 0   | 13 | AI     | 3.62 | 0.0571 | 0.0324 | PKD domain protein                                                                 |
| Cluster_171555 | 0  | 3  | 47 | 20 | 0   | 13 | AI     | 3.62 | 0.0571 | 0.0324 | conserved hypothetical protein                                                     |
| Cluster_171556 | 0  | 3  | 47 | 20 | 0   | 13 | AI     | 3.62 | 0.0571 | 0.0324 | <i>mtiA</i>                                                                        |
| Cluster_171708 | 0  | 3  | 47 | 20 | 0   | 13 | AI     | 3.62 | 0.0571 | 0.0324 | PTS system, mannitol-specific IIC component family protein                         |
| Cluster_171719 | 0  | 3  | 47 | 20 | 0   | 13 | AI     | 3.62 | 0.0571 | 0.0324 | conserved hypothetical protein                                                     |
| Cluster_173284 | 0  | 3  | 47 | 20 | 0   | 13 | AI     | 3.62 | 0.0571 | 0.0324 | bacterial extracellular solute-binding family protein                              |
| Cluster_173286 | 0  | 3  | 47 | 20 | 0   | 13 | AI     | 3.62 | 0.0571 | 0.0324 | binding-protein-dependent transport system inner membrane component family protein |
| Cluster_186687 | 47 | 20 | 0  | 3  | 100 | 87 | LI+NSI | 3.62 | 0.0571 | 0.0324 | glycerophosphoryl diester phosphodiesterase family protein                         |
| Cluster_191111 | 0  | 3  | 47 | 20 | 0   | 13 | AI     | 3.62 | 0.0571 | 0.0324 | ROK family protein                                                                 |
| Cluster_191116 | 0  | 3  | 47 | 20 | 0   | 13 | AI     | 3.62 | 0.0571 | 0.0324 | conserved hypothetical protein                                                     |
| Cluster_191126 | 0  | 3  | 47 | 20 | 0   | 13 | AI     | 3.62 | 0.0571 | 0.0324 | glycosyl transferase 2 family protein                                              |
| Cluster_191129 | 0  | 3  | 47 | 20 | 0   | 13 | AI     | 3.62 | 0.0571 | 0.0324 | conserved hypothetical protein                                                     |
| Cluster_191132 | 0  | 3  | 47 | 20 | 0   | 13 | AI     | 3.62 | 0.0571 | 0.0324 | transcriptional repressor PifC                                                     |
| Cluster_191136 | 0  | 3  | 47 | 20 | 0   | 13 | AI     | 3.62 | 0.0571 | 0.0324 | <i>pifC</i>                                                                        |
| Cluster_206060 | 0  | 3  | 47 | 20 | 0   | 13 | AI     | 3.62 | 0.0571 | 0.0324 | conserved hypothetical protein                                                     |
| Cluster_206339 | 0  | 3  | 47 | 20 | 0   | 13 | AI     | 3.62 | 0.0571 | 0.0324 | serA                                                                               |
| Cluster_207555 | 0  | 3  | 47 | 20 | 0   | 13 | AI     | 3.62 | 0.0571 | 0.0324 | D-3-phosphoglycerate dehydrogenase                                                 |
| Cluster_207556 | 0  | 3  | 47 | 20 | 0   | 13 | AI     | 3.62 | 0.0571 | 0.0324 | conserved hypothetical protein                                                     |
| Cluster_207558 | 0  | 3  | 47 | 20 | 0   | 13 | AI     | 3.62 | 0.0571 | 0.0324 | conserved hypothetical protein                                                     |
| Cluster_2076   | 0  | 3  | 47 | 20 | 0   | 13 | AI     | 3.62 | 0.0571 | 0.0324 | phage portal protein, lambda family                                                |
| Cluster_20847  | 47 | 20 | 0  | 3  | 100 | 87 | LI+NSI | 3.62 | 0.0571 | 0.0324 | conserved hypothetical protein                                                     |
| Cluster_22912  | 47 | 20 | 0  | 3  | 100 | 87 | LI+NSI | 3.62 | 0.0571 | 0.0324 | hypothetical protein                                                               |
| Cluster_233858 | 47 | 20 | 0  | 3  | 100 | 87 | LI+NSI | 3.62 | 0.0571 | 0.0324 | ABC transporter family protein                                                     |
| Cluster_23603  | 47 | 20 | 0  | 3  | 100 | 87 | LI+NSI | 3.62 | 0.0571 | 0.0324 | putative predicted protein                                                         |
| Cluster_245044 | 47 | 20 | 0  | 3  | 100 | 87 | LI+NSI | 3.62 | 0.0571 | 0.0324 | recF/RecN/SMC N terminal domain protein                                            |
| Cluster_25913  | 47 | 20 | 0  | 3  | 100 | 87 | LI+NSI | 3.62 | 0.0571 | 0.0324 | conserved hypothetical protein                                                     |
| Cluster_262370 | 47 | 20 | 0  | 3  | 100 | 87 | LI+NSI | 3.62 | 0.0571 | 0.0324 | conserved hypothetical protein                                                     |
| Cluster_264237 | 47 | 20 | 0  | 3  | 100 | 87 | LI+NSI | 3.62 | 0.0571 | 0.0324 | conserved hypothetical protein                                                     |
| Cluster_266695 | 47 | 20 | 0  | 3  | 100 | 87 | LI+NSI | 3.62 | 0.0571 | 0.0324 | recombinase family protein                                                         |
| Cluster_272440 | 47 | 20 | 0  | 3  | 100 | 87 | LI+NSI | 3.62 | 0.0571 | 0.0324 | conserved hypothetical protein                                                     |
| Cluster_279315 | 47 | 20 | 0  | 3  | 100 | 87 | LI+NSI | 3.62 | 0.0571 | 0.0324 | putative hydroxypyruvate isomerase YgbM                                            |
| Cluster_283246 | 47 | 20 | 0  | 3  | 100 | 87 | LI+NSI | 3.62 | 0.0571 | 0.0324 | DNA-binding transcriptional regulator domain protein                               |
| Cluster_313114 | 47 | 20 | 0  | 3  | 100 | 87 | LI+NSI | 3.62 | 0.0571 | 0.0324 | putative acyltransferase YihG                                                      |
| Cluster_315927 | 47 | 20 | 0  | 3  | 100 | 87 | LI+NSI | 3.62 | 0.0571 | 0.0324 | <i>ydiN</i>                                                                        |
| Cluster_321371 | 0  | 3  | 47 | 20 | 0   | 13 | AI     | 3.62 | 0.0571 | 0.0324 | inner membrane transport protein YdiN                                              |
| Cluster_327487 | 47 | 20 | 0  | 3  | 100 | 87 | LI+NSI | 3.62 | 0.0571 | 0.0324 | tRNA-modifying protein YgfZ                                                        |
| Cluster_33461  | 47 | 20 | 0  | 3  | 100 | 87 | LI+NSI | 3.62 | 0.0571 | 0.0324 | <i>ygfZ</i>                                                                        |
| Cluster_340496 | 47 | 20 | 0  | 3  | 100 | 87 | LI+NSI | 3.62 | 0.0571 | 0.0324 | small-conductance mechanosensitive channel                                         |
| Cluster_36336  | 0  | 3  | 47 | 20 | 0   | 13 | AI     | 3.62 | 0.0571 | 0.0324 | arginine exporter protein ArgO                                                     |
| Cluster_36339  | 0  | 3  | 47 | 20 | 0   | 13 | AI     | 3.62 | 0.0571 | 0.0324 | glycosyl hydrolases 25 family protein                                              |
| Cluster_36341  | 0  | 3  | 47 | 20 | 0   | 13 | AI     | 3.62 | 0.0571 | 0.0324 | putative transcriptional regulator                                                 |
| Cluster_36450  | 0  | 3  | 47 | 20 | 0   | 13 | AI     | 3.62 | 0.0571 | 0.0324 | flavodoxin                                                                         |
| Cluster_36837  | 0  | 3  | 47 | 20 | 0   | 13 | AI     | 3.62 | 0.0571 | 0.0324 | phosphoglycerate kinase                                                            |
| Cluster_37187  | 0  | 3  | 47 | 20 | 0   | 13 | AI     | 3.62 | 0.0571 | 0.0324 | histidine phosphatase super family protein                                         |
| Cluster_38770  | 0  | 3  | 47 | 20 | 0   | 13 | AI     | 3.62 | 0.0571 | 0.0324 | HTH-type transcriptional regulator YiaJ                                            |
| Cluster_38775  | 0  | 3  | 47 | 20 | 0   | 13 | AI     | 3.62 | 0.0571 | 0.0324 | <i>yiaJ</i>                                                                        |
| Cluster_3913   | 0  | 3  | 47 | 20 | 0   | 13 | AI     | 3.62 | 0.0571 | 0.0324 | binding-protein-dependent transport system inner membrane component family protein |
| Cluster_3917   | 0  | 3  | 47 | 20 | 0   | 13 | AI     | 3.62 | 0.0571 | 0.0324 | class II Aldolase and Adducin N-terminal domain protein                            |
| Cluster_39213  | 0  | 3  | 47 | 20 | 0   | 13 | AI     | 3.62 | 0.0571 | 0.0324 | <i>epd</i>                                                                         |
| Cluster_3922   | 0  | 3  | 47 | 20 | 0   | 13 | AI     | 3.62 | 0.0571 | 0.0324 | erythrose-4-phosphate dehydrogenase                                                |
| Cluster_39224  | 0  | 3  | 47 | 20 | 0   | 13 | AI     | 3.62 | 0.0571 | 0.0324 | <i>xerD</i>                                                                        |
| Cluster_39245  | 0  | 3  | 47 | 20 | 0   | 13 | AI     | 3.62 | 0.0571 | 0.0324 | tyrosine recombinase XerD                                                          |
| Cluster_39264  | 0  | 3  | 47 | 20 | 0   | 13 | AI     | 3.62 | 0.0571 | 0.0324 | cupin fold metallo, WbuC family protein                                            |
| Cluster_3934   | 0  | 3  | 47 | 20 | 0   | 13 | AI     | 3.62 | 0.0571 | 0.0324 | rmlD substrate binding domain protein                                              |
| Cluster_39356  | 0  | 3  | 47 | 20 | 0   | 13 | AI     | 3.62 | 0.0571 | 0.0324 | dihydrouridine synthase family protein                                             |
| Cluster_39363  | 0  | 3  | 47 | 20 | 0   | 13 | AI     | 3.62 | 0.0571 | 0.0324 | type III restriction enzyme, res subunit                                           |
| Cluster_4140   | 0  | 3  | 47 | 20 | 0   | 13 | AI     | 3.62 | 0.0571 | 0.0324 | conserved hypothetical protein                                                     |
| Cluster_44306  | 47 | 20 | 0  | 3  | 100 | 87 | LI+NSI | 3.62 | 0.0571 | 0.0324 | O-antigen ligase like membrane family protein                                      |
| Cluster_4584   | 0  | 3  | 47 | 20 | 0   | 13 | AI     | 3.62 | 0.0571 | 0.0324 | conserved hypothetical protein                                                     |
| Cluster_4585   | 0  | 3  | 47 | 20 | 0   | 13 | AI     | 3.62 | 0.0571 | 0.0324 | conserved hypothetical protein                                                     |
| Cluster_4591   | 0  | 3  | 47 | 20 | 0   | 13 | AI     | 3.62 | 0.0571 | 0.0324 | conserved hypothetical protein                                                     |
| Cluster_4592   | 0  | 3  | 47 | 20 | 0   | 13 | AI     |      |        |        |                                                                                    |

|                |    |    |    |    |     |     |        |      |        |        |                                                                          |
|----------------|----|----|----|----|-----|-----|--------|------|--------|--------|--------------------------------------------------------------------------|
| Cluster_66109  | 47 | 20 | 0  | 3  | 100 | 87  | LI+NSI | 3.62 | 0.0571 | 0.0324 |                                                                          |
| Cluster_66189  | 0  | 3  | 47 | 20 | 0   | 13  | AI     | 3.62 | 0.0571 | 0.0324 | AAA domain family protein                                                |
| Cluster_6886   | 0  | 3  | 47 | 20 | 0   | 13  | AI     | 3.62 | 0.0571 | 0.0324 | histidine biosynthesis family protein                                    |
| Cluster_6888   | 0  | 3  | 47 | 20 | 0   | 13  | AI     | 3.62 | 0.0571 | 0.0324 | transposase family protein                                               |
| Cluster_69114  | 0  | 3  | 47 | 20 | 0   | 13  | AI     | 3.62 | 0.0571 | 0.0324 | transposase IS66 family protein                                          |
| Cluster_69143  | 0  | 3  | 47 | 20 | 0   | 13  | AI     | 3.62 | 0.0571 | 0.0324 | conserved hypothetical protein                                           |
| Cluster_82015  | 47 | 20 | 0  | 3  | 100 | 87  | LI+NSI | 3.62 | 0.0571 | 0.0324 | conserved hypothetical protein                                           |
| Cluster_84327  | 47 | 20 | 0  | 3  | 100 | 87  | LI+NSI | 3.62 | 0.0571 | 0.0324 | conserved hypothetical protein                                           |
| Cluster_8866   | 0  | 3  | 47 | 20 | 0   | 13  | AI     | 3.62 | 0.0571 | 0.0324 | conserved hypothetical protein                                           |
| Cluster_8868   | 0  | 3  | 47 | 20 | 0   | 13  | AI     | 3.62 | 0.0571 | 0.0324 | conserved hypothetical protein                                           |
| Cluster_94403  | 0  | 3  | 47 | 20 | 0   | 13  | AI     | 3.62 | 0.0571 | 0.0324 | glycosyltransferase Family 4 family protein                              |
| Cluster_96049  | 47 | 20 | 0  | 3  | 100 | 87  | LI+NSI | 3.62 | 0.0571 | 0.0324 | conserved hypothetical protein                                           |
| Cluster_96081  | 47 | 20 | 0  | 3  | 100 | 87  | LI+NSI | 3.62 | 0.0571 | 0.0324 | DSBA-like thioredoxin domain protein                                     |
| Cluster_97991  | 47 | 20 | 0  | 3  | 100 | 87  | LI+NSI | 3.62 | 0.0571 | 0.0324 | fructose-bisphosphate aldolase, class II                                 |
| Cluster_99789  | 47 | 20 | 0  | 3  | 100 | 87  | LI+NSI | 3.62 | 0.0571 | 0.0324 | glyoxylate/hydroxypyruvate reductase A                                   |
| Cluster_14843  | 43 | 16 | 4  | 7  | 91  | 70  | LI+NSI | 4.07 | 0.0436 | 0.0324 | ribose 5-phosphate isomerase A                                           |
| Cluster_179213 | 43 | 16 | 4  | 7  | 91  | 70  | LI+NSI | 4.07 | 0.0436 | 0.0324 | head-to-tail joining protein W                                           |
| Cluster_183211 | 43 | 16 | 4  | 7  | 91  | 70  | LI+NSI | 4.07 | 0.0436 | 0.0324 | conserved hypothetical protein                                           |
| Cluster_271588 | 4  | 7  | 43 | 16 | 9   | 30  | AI     | 4.07 | 0.0436 | 0.0324 | DNA methylase family protein                                             |
| Cluster_43808  | 43 | 16 | 4  | 7  | 91  | 70  | LI+NSI | 4.07 | 0.0436 | 0.0324 | prophage CP4-57 integrase                                                |
| Cluster_64148  | 43 | 16 | 4  | 7  | 91  | 70  | LI+NSI | 4.07 | 0.0436 | 0.0324 | type III/IV secretion system family protein                              |
| Cluster_107631 | 34 | 10 | 13 | 13 | 72  | 43  | LI+NSI | 4.34 | 0.0372 | 0.0338 | hypothetical protein                                                     |
| Cluster_175201 | 21 | 4  | 26 | 19 | 45  | 17  | LI+NSI | 3.89 | 0.0485 | 0.0339 | phage tail tape measure protein, TP901 family, core region               |
| Cluster_175778 | 21 | 4  | 26 | 19 | 45  | 17  | LI+NSI | 3.89 | 0.0485 | 0.0339 | fimbrial family protein                                                  |
| Cluster_221767 | 21 | 4  | 26 | 19 | 45  | 17  | LI+NSI | 3.89 | 0.0485 | 0.0339 | homeo-like domain protein                                                |
| Cluster_233786 | 21 | 4  | 26 | 19 | 45  | 17  | LI+NSI | 3.89 | 0.0485 | 0.0339 | putative nleA1 protein                                                   |
| Cluster_309397 | 21 | 4  | 26 | 19 | 45  | 17  | LI+NSI | 3.89 | 0.0485 | 0.0339 | intimin                                                                  |
| Cluster_342620 | 21 | 4  | 26 | 19 | 45  | 17  | LI+NSI | 3.89 | 0.0485 | 0.0339 | winged helix-turn-helix DNA-binding family protein                       |
| Cluster_53395  | 21 | 4  | 26 | 19 | 45  | 17  | LI+NSI | 3.89 | 0.0485 | 0.0339 | putative predicted protein                                               |
| Cluster_103321 | 40 | 14 | 7  | 9  | 85  | 61  | LI+NSI | 3.86 | 0.0494 | 0.0342 | haemolysin expression modulating family protein                          |
| Cluster_227577 | 7  | 9  | 40 | 14 | 15  | 39  | AI     | 3.86 | 0.0494 | 0.0342 | tonB family C-terminal domain protein                                    |
| Cluster_117516 | 45 | 18 | 2  | 5  | 96  | 78  | LI+NSI | 3.48 | 0.0620 | 0.0345 | single-stranded DNA-binding protein                                      |
| Cluster_210145 | 2  | 5  | 45 | 18 | 4   | 22  | AI     | 3.48 | 0.0620 | 0.0345 | lysR substrate binding domain protein                                    |
| Cluster_210210 | 2  | 5  | 45 | 18 | 4   | 22  | AI     | 3.48 | 0.0620 | 0.0345 | conserved hypothetical protein                                           |
| Cluster_210211 | 2  | 5  | 45 | 18 | 4   | 22  | AI     | 3.48 | 0.0620 | 0.0345 | hpaC 4-hydroxyphenylacetate 3-monoxygenase, reductase component          |
| Cluster_210215 | 2  | 5  | 45 | 18 | 4   | 22  | AI     | 3.48 | 0.0620 | 0.0345 | hpaB 4-hydroxyphenylacetate 3-monoxygenase, oxygenase component          |
| Cluster_244107 | 45 | 18 | 2  | 5  | 96  | 78  | LI+NSI | 3.48 | 0.0620 | 0.0345 | hpaH 2-oxo-hepta-3-ene-1,7-dioic acid hydratase                          |
| Cluster_284907 | 45 | 18 | 2  | 5  | 96  | 78  | LI+NSI | 3.48 | 0.0620 | 0.0345 | putative purine permease YgfU                                            |
| Cluster_315512 | 2  | 5  | 45 | 18 | 4   | 22  | AI     | 3.48 | 0.0620 | 0.0345 | cryptic outer membrane porin BglI                                        |
| Cluster_315513 | 2  | 5  | 45 | 18 | 4   | 22  | AI     | 3.48 | 0.0620 | 0.0345 | hpaA 4-hydroxyphenylacetate catabolism regulatory protein HpaA           |
| Cluster_315514 | 2  | 5  | 45 | 18 | 4   | 22  | AI     | 3.48 | 0.0620 | 0.0345 | hpaX 4-hydroxyphenylacetate permease                                     |
| Cluster_315515 | 2  | 5  | 45 | 18 | 4   | 22  | AI     | 3.48 | 0.0620 | 0.0345 | hpaI 2,4-dihydroxyhept-2-ene-1,7-dioic acid aldolase                     |
| Cluster_315519 | 2  | 5  | 45 | 18 | 4   | 22  | AI     | 3.48 | 0.0620 | 0.0345 | hpaE 5-carboxymethyl-2-hydroxymuconate semialdehyde dehydrogenase        |
| Cluster_315520 | 2  | 5  | 45 | 18 | 4   | 22  | AI     | 3.48 | 0.0620 | 0.0345 | hpcE homoprotocatechuate catabolism bifunctional isomerase/decarboxylase |
| Cluster_322310 | 45 | 18 | 2  | 5  | 96  | 78  | LI+NSI | 3.48 | 0.0620 | 0.0345 | hpaR homoprotocatechuate degradation operon regulator, HpaR              |
| Cluster_336901 | 45 | 18 | 2  | 5  | 96  | 78  | LI+NSI | 3.48 | 0.0620 | 0.0345 | conserved hypothetical protein                                           |
| Cluster_38037  | 2  | 5  | 45 | 18 | 4   | 22  | AI     | 3.48 | 0.0620 | 0.0345 | viaO 2,3-diketo-L-gulonate-binding periplasmic protein ViaO              |
| Cluster_94313  | 2  | 5  | 45 | 18 | 4   | 22  | AI     | 3.48 | 0.0620 | 0.0345 | hpaD 3,4-dihydroxyphenylacetate 2,3-dioxygenase                          |
| Cluster_227923 | 35 | 11 | 12 | 12 | 74  | 48  | LI+NSI | 3.75 | 0.0527 | 0.0348 | conserved hypothetical protein                                           |
| Cluster_331872 | 35 | 11 | 12 | 12 | 74  | 48  | LI+NSI | 3.75 | 0.0527 | 0.0348 | conserved hypothetical protein                                           |
| Cluster_346478 | 35 | 11 | 12 | 12 | 74  | 48  | LI+NSI | 3.75 | 0.0527 | 0.0348 | putative transposase                                                     |
| Cluster_150583 | 46 | 19 | 1  | 4  | 98  | 83  | LI+NSI | 3.37 | 0.0665 | 0.0372 | conserved hypothetical protein                                           |
| Cluster_212386 | 46 | 19 | 1  | 4  | 98  | 83  | LI+NSI | 3.37 | 0.0665 | 0.0372 | transposase family protein                                               |
| Cluster_23668  | 46 | 19 | 1  | 4  | 98  | 83  | LI+NSI | 3.37 | 0.0665 | 0.0372 | sigma-54 interaction domain protein                                      |
| Cluster_244058 | 46 | 19 | 1  | 4  | 98  | 83  | LI+NSI | 3.37 | 0.0665 | 0.0372 | allantoinase amidohydrolase                                              |
| Cluster_273174 | 46 | 19 | 1  | 4  | 98  | 83  | LI+NSI | 3.37 | 0.0665 | 0.0372 | zinc-binding dehydrogenase family protein                                |
| Cluster_315018 | 1  | 4  | 46 | 19 | 2   | 17  | AI     | 3.37 | 0.0665 | 0.0372 | cobC alpha-ribazole phosphatase                                          |
| Cluster_81324  | 46 | 19 | 1  | 4  | 98  | 83  | LI+NSI | 3.37 | 0.0665 | 0.0372 | conserved hypothetical protein                                           |
| Cluster_89657  | 46 | 19 | 1  | 4  | 98  | 83  | LI+NSI | 3.37 | 0.0665 | 0.0372 | PTS system, mannose/fructose/sorbitose, IID component family protein     |
| Cluster_83620  | 32 | 9  | 15 | 14 | 68  | 39  | LI+NSI | 4.21 | 0.0402 | 0.0376 | bacterial extracellular solute-binding, 7 family protein                 |
| Cluster_195887 | 23 | 5  | 24 | 18 | 49  | 22  | LI+NSI | 3.69 | 0.0546 | 0.0385 | bacteriophage lambda tail assembly I family protein                      |
| Cluster_211780 | 24 | 18 | 23 | 5  | 51  | 78  | AI     | 3.69 | 0.0546 | 0.0385 | conserved hypothetical protein                                           |
| Cluster_228673 | 23 | 5  | 24 | 18 | 49  | 22  | LI+NSI | 3.69 | 0.0546 | 0.0385 | conserved hypothetical protein                                           |
| Cluster_337356 | 33 | 10 | 14 | 13 | 70  | 43  | LI+NSI | 3.60 | 0.0578 | 0.0391 | phage regulatory Rha family protein                                      |
| Cluster_127340 | 30 | 8  | 17 | 15 | 64  | 35  | LI+NSI | 4.15 | 0.0418 | 0.0398 | aminoglycoside/hydroxyurea antibiotic resistance kinase family protein   |
| Cluster_188245 | 30 | 8  | 17 | 15 | 64  | 35  | LI+NSI | 4.15 | 0.0418 | 0.0398 | DDE_Tnp_1-associated family protein                                      |
| Cluster_4832   | 30 | 8  | 17 | 15 | 64  | 35  | LI+NSI | 4.15 | 0.0418 | 0.0398 | conserved hypothetical protein                                           |
| Cluster_88753  | 30 | 8  | 17 | 15 | 64  | 35  | LI+NSI | 4.15 | 0.0418 | 0.0398 | conserved hypothetical protein                                           |
| Cluster_152550 | 15 | 2  | 32 | 21 | 32  | 9   | LI+NSI | 3.35 | 0.0671 | 0.0401 | DNA methylase family protein                                             |
| Cluster_246778 | 15 | 2  | 32 | 21 | 32  | 9   | LI+NSI | 3.35 | 0.0671 | 0.0401 | conserved hypothetical protein                                           |
| Cluster_289072 | 15 | 2  | 32 | 21 | 32  | 9   | LI+NSI | 3.35 | 0.0671 | 0.0401 | mbeD/MobD like family protein                                            |
| Cluster_307827 | 15 | 2  | 32 | 21 | 32  | 9   | LI+NSI | 3.35 | 0.0671 | 0.0401 | conserved hypothetical protein                                           |
| Cluster_72088  | 15 | 2  | 32 | 21 | 32  | 9   | LI+NSI | 3.35 | 0.0671 | 0.0401 | transposase DDE domain protein                                           |
| Cluster_72092  | 15 | 2  | 32 | 21 | 32  | 9   | LI+NSI | 3.35 | 0.0671 | 0.0401 | mobilization protein MbeC                                                |
| Cluster_73491  | 15 | 2  | 32 | 21 | 32  | 9   | LI+NSI | 3.35 | 0.0671 | 0.0401 | glycosyl transferases group 1 family protein                             |
| Cluster_135838 | 25 | 6  | 22 | 17 | 53  | 26  | LI+NSI | 3.57 | 0.0590 | 0.0417 | transposase DDE domain protein                                           |
| Cluster_165317 | 25 | 6  | 22 | 17 | 53  | 26  | LI+NSI | 3.57 | 0.0590 | 0.0417 | PIN domain protein                                                       |
| Cluster_266376 | 25 | 6  | 22 | 17 | 53  | 26  | LI+NSI | 3.57 | 0.0590 | 0.0417 | PIN domain protein                                                       |
| Cluster_266615 | 25 | 6  | 22 | 17 | 53  | 26  | LI+NSI | 3.57 | 0.0590 | 0.0417 | conserved hypothetical protein                                           |
| Cluster_276693 | 25 | 6  | 22 | 17 | 53  | 26  | LI+NSI | 3.57 | 0.0590 | 0.0417 | conserved hypothetical protein                                           |
| Cluster_302107 | 25 | 6  | 22 | 17 | 53  | 26  | LI+NSI | 3.57 | 0.0590 | 0.0417 | putative yubO                                                            |
| Cluster_337809 | 25 | 6  | 22 | 17 | 53  | 26  | LI+NSI | 3.57 | 0.0590 | 0.0417 | PIN domain protein                                                       |
| Cluster_24448  | 31 | 9  | 16 | 14 | 66  | 39  | LI+NSI | 3.51 | 0.0610 | 0.0420 | conserved hypothetical protein                                           |
| Cluster_222333 | 27 | 7  | 20 | 16 | 57  | 30  | LI+NSI | 3.49 | 0.0616 | 0.0434 | putative antigen 43 domain protein                                       |
| Cluster_252976 | 27 | 7  | 20 | 16 | 57  | 30  | LI+NSI | 3.49 | 0.0616 | 0.0434 | prophage minor tail Z family protein                                     |
| Cluster_59004  | 27 | 7  | 20 | 16 | 57  | 30  | LI+NSI | 3.49 | 0.0616 | 0.0434 | phage major capsid protein, HK97 family                                  |
| Cluster_183184 | 29 | 8  | 18 | 15 | 62  | 35  | LI+NSI | 3.48 | 0.0623 | 0.0435 | phage prohead protease, HK97 family                                      |
| Cluster_147263 | 38 | 13 | 9  | 10 | 81  | 57  | LI+NSI | 3.47 | 0.0623 | 0.0455 | phage prohead protease, HK97 family                                      |
| Cluster_153719 | 9  | 10 | 38 | 13 | 19  | 43  | AI     | 3.47 | 0.0623 | 0.0455 | phage minor tail protein G                                               |
| Cluster_326910 | 38 | 13 | 9  | 10 | 81  | 57  | LI+NSI | 3.47 | 0.0623 | 0.0455 | methytransferase domain protein                                          |
| Cluster_107544 | 8  | 0  | 39 | 23 | 17  | 0   | LI+NSI | 2.90 | 0.0887 | 0.0461 | glycosyl transferase 8 family protein                                    |
| Cluster_107547 | 8  | 0  | 39 | 23 | 17  | 0   | LI+NSI | 2.90 | 0.0887 | 0.0461 | hydantoinase/oxoprolinase family protein                                 |
| Cluster_163913 | 8  | 0  | 39 | 23 | 17  | 0   | LI+NSI | 2.90 | 0.0887 | 0.0461 | tape measure domain protein                                              |
| Cluster_177488 | 8  | 0  | 39 | 23 | 17  | 0   | LI+NSI | 2.90 | 0.0887 | 0.0461 | conserved hypothetical protein                                           |
| Cluster_240829 | 8  | 0  | 39 | 23 | 17  | 0   | LI+NSI | 2.90 | 0.0887 | 0.0461 | polysaccharide biosynthesis family protein                               |
| Cluster_246425 | 8  | 0  | 39 | 23 | 17  | 0   | LI+NSI | 2.90 | 0.0887 | 0.0461 | flagellin                                                                |
| Cluster_261814 | 8  | 0  | 39 | 23 | 17  | 0   | LI+NSI | 2.90 | 0.0887 | 0.0461 | hypothetical protein                                                     |
| Cluster_272852 | 8  | 0  | 39 | 23 | 17  | 0   | LI+NSI | 2.90 | 0.0887 | 0.0461 | conserved hypothetical protein                                           |
| Cluster_275815 | 39 | 23 | 8  | 0  | 83  | 100 | AI     | 2.90 | 0.0887 | 0.0461 | conserved hypothetical protein                                           |
| Cluster_281736 | 8  | 0  | 39 | 23 | 17  | 0   | LI+NSI | 2.90 | 0.0887 | 0.0461 | GDP-mannose mannosyl hydrolase                                           |
| Cluster_291294 | 8  | 0  | 39 | 23 | 17  | 0   | LI+NSI | 2.90 | 0.0887 | 0.0461 | putative orf4 protein                                                    |
| Cluster_326791 | 8  | 0  | 39 | 23 | 17  | 0   | LI+NSI | 2.90 | 0.0887 | 0.0461 | putative pyridoxamine 5-phosphate-dependent dehydrase                    |
| Cluster_348249 | 39 | 23 | 8  | 0  | 83  | 100 | AI     | 2.90 | 0.0887 | 0.0461 | ogr/Delta-like zinc finger family protein                                |
| Cluster_73598  | 8  | 0  | 39 | 23 | 17  | 0   | LI+NSI | 2.90 | 0.0887 | 0.0461 | neutral zinc metalloproteinase family protein                            |
|                |    |    |    |    |     |     |        |      |        |        | conserved hypothetical protein                                           |

|                |    |    |    |    |    |    |        |      |        |        |                                       |
|----------------|----|----|----|----|----|----|--------|------|--------|--------|---------------------------------------|
| Cluster_73829  | 8  | 0  | 39 | 23 | 17 | 0  | LI+NSI | 2.90 | 0.0887 | 0.0461 | mIId substrate binding domain protein |
| Cluster_73987  | 8  | 0  | 39 | 23 | 17 | 0  | LI+NSI | 2.90 | 0.0887 | 0.0461 | hypothetical protein                  |
| Cluster_74186  | 8  | 0  | 39 | 23 | 17 | 0  | LI+NSI | 2.90 | 0.0887 | 0.0461 | helix-turn-helix domain protein       |
| Cluster_120672 | 12 | 1  | 35 | 22 | 26 | 4  | LI+NSI | 3.29 | 0.0697 | 0.0476 | conserved hypothetical protein        |
| Cluster_14417  | 12 | 1  | 35 | 22 | 26 | 4  | LI+NSI | 3.29 | 0.0697 | 0.0476 | putative predicted protein            |
| Cluster_201403 | 12 | 1  | 35 | 22 | 26 | 4  | LI+NSI | 3.29 | 0.0697 | 0.0476 | conserved hypothetical protein        |
| Cluster_244238 | 35 | 22 | 12 | 1  | 74 | 96 | AI     | 3.29 | 0.0697 | 0.0476 | conserved hypothetical protein        |
| Cluster_263937 | 12 | 1  | 35 | 22 | 26 | 4  | LI+NSI | 3.29 | 0.0697 | 0.0476 | conserved hypothetical protein        |
| Cluster_278863 | 12 | 1  | 35 | 22 | 26 | 4  | LI+NSI | 3.29 | 0.0697 | 0.0476 | conserved hypothetical protein        |
| Cluster_300133 | 12 | 1  | 35 | 22 | 26 | 4  | LI+NSI | 3.29 | 0.0697 | 0.0476 | phage integrase family protein        |
| Cluster_4740   | 12 | 1  | 35 | 22 | 26 | 4  | LI+NSI | 3.29 | 0.0697 | 0.0476 | marR family protein                   |
| Cluster_56342  | 12 | 1  | 35 | 22 | 26 | 4  | LI+NSI | 3.29 | 0.0697 | 0.0476 | conserved hypothetical protein        |
| Cluster_58271  | 12 | 1  | 35 | 22 | 26 | 4  | LI+NSI | 3.29 | 0.0697 | 0.0476 | conserved hypothetical protein        |
| Cluster_105805 | 42 | 16 | 5  | 7  | 89 | 70 | LI+NSI | 2.98 | 0.0842 | 0.0498 | DNA methylase family protein          |
| Cluster_147010 | 5  | 7  | 42 | 16 | 11 | 30 | AI     | 2.98 | 0.0842 | 0.0498 | MULE transposase domain protein       |
| Cluster_147011 | 5  | 7  | 42 | 16 | 11 | 30 | AI     | 2.98 | 0.0842 | 0.0498 | conserved hypothetical protein        |
| Cluster_147907 | 5  | 7  | 42 | 16 | 11 | 30 | AI     | 2.98 | 0.0842 | 0.0498 | HNH endonuclease family protein       |
| Cluster_302972 | 42 | 16 | 5  | 7  | 89 | 70 | LI+NSI | 2.98 | 0.0842 | 0.0498 | DNA methylase family protein          |

Lethal (LI) vs. Non-Lethal (NSI+AI)

| Cluster ID     | No. of Genomes                |                              | Percentage of Genomes Containing Cluster |        |      |          | Chi-squared test |           | Fisher's exact test | Gene ID | Predicted Protein Function |                                                                                      |
|----------------|-------------------------------|------------------------------|------------------------------------------|--------|------|----------|------------------|-----------|---------------------|---------|----------------------------|--------------------------------------------------------------------------------------|
|                | Present (≥0.9) <sup>a,b</sup> | Absent (<0.9) <sup>a,b</sup> | LI                                       | NSI+AI | % LI | % NSI+AI | Greater %        | statistic | p-value             |         |                            |                                                                                      |
| Cluster_101055 | 20                            | 46                           | 4                                        | 0      | 83   | 100      | NSI+AI           | 5.33      | 0.0209              | 0.0116  | <i>prc</i>                 | tail-specific protease                                                               |
| Cluster_103685 | 24                            | 37                           | 0                                        | 9      | 100  | 80       | LI               | 3.78      | 0.0518              | 0.0230  |                            | hypothetical protein                                                                 |
| Cluster_10467  | 17                            | 20                           | 7                                        | 26     | 71   | 43       | LI               | 3.70      | 0.0543              | 0.0434  |                            | phage Terminase family protein                                                       |
| Cluster_104831 | 20                            | 45                           | 4                                        | 1      | 83   | 98       | NSI+AI           | 3.05      | 0.0808              | 0.0439  |                            | binding-protein-dependent transport system inner membrane component family protein   |
| Cluster_104965 | 4                             | 1                            | 20                                       | 45     | 17   | 2        | LI               | 3.05      | 0.0808              | 0.0439  |                            | transposase family protein                                                           |
| Cluster_105254 | 20                            | 46                           | 4                                        | 0      | 83   | 100      | NSI+AI           | 5.33      | 0.0209              | 0.0116  | <i>aceF</i>                | dihydrodipolyllysine-residue acetyltransferase                                       |
| Cluster_105805 | 23                            | 35                           | 1                                        | 11     | 96   | 76       | LI               | 3.05      | 0.0807              | 0.0471  |                            | DNA methylase family protein                                                         |
| Cluster_108011 | 13                            | 9                            | 11                                       | 37     | 54   | 20       | LI               | 7.23      | 0.0072              | 0.0059  | <i>traN</i>                | type-F conjugative transfer system mating-pair stabilization protein TraN            |
| Cluster_108037 | 21                            | 46                           | 3                                        | 0      | 88   | 100      | NSI+AI           | 3.35      | 0.0673              | 0.0370  | <i>baeS</i>                | signal transduction histidine-protein kinase BaeS                                    |
| Cluster_108754 | 17                            | 20                           | 7                                        | 26     | 71   | 43       | LI               | 3.70      | 0.0543              | 0.0434  |                            | phage terminase, small subunit, P27 family                                           |
| Cluster_11079  | 11                            | 37                           | 13                                       | 9      | 46   | 80       | NSI+AI           | 7.23      | 0.0072              | 0.0059  |                            | transglycosylase SLT domain protein                                                  |
| Cluster_113457 | 14                            | 39                           | 10                                       | 7      | 58   | 85       | NSI+AI           | 4.65      | 0.0311              | 0.0201  | <i>fimF</i>                | protein FimF                                                                         |
| Cluster_113721 | 7                             | 30                           | 17                                       | 16     | 29   | 65       | NSI+AI           | 6.84      | 0.0089              | 0.0056  |                            | phage tail tape measure protein, lambda family                                       |
| Cluster_115306 | 7                             | 4                            | 17                                       | 42     | 29   | 9        | LI               | 3.56      | 0.0590              | 0.0381  |                            | putative membrane protein                                                            |
| Cluster_11780  | 20                            | 45                           | 4                                        | 1      | 83   | 98       | NSI+AI           | 3.05      | 0.0808              | 0.0439  | <i>ntrC</i>                | nitrogen regulation protein NR                                                       |
| Cluster_118562 | 8                             | 5                            | 16                                       | 41     | 33   | 11       | LI               | 3.88      | 0.0488              | 0.0482  |                            | istB-like ATP binding family protein                                                 |
| Cluster_120204 | 13                            | 13                           | 11                                       | 33     | 54   | 28       | LI               | 3.49      | 0.0617              | 0.0406  |                            | conserved hypothetical protein                                                       |
| Cluster_120557 | 20                            | 46                           | 4                                        | 0      | 83   | 100      | NSI+AI           | 5.33      | 0.0209              | 0.0116  | <i>surE</i>                | 5'/3'-nucleotidase SurE                                                              |
| Cluster_125122 | 7                             | 2                            | 17                                       | 44     | 29   | 4        | LI               | 6.60      | 0.0102              | 0.0060  |                            | putative predicted protein                                                           |
| Cluster_12646  | 20                            | 45                           | 4                                        | 1      | 83   | 98       | NSI+AI           | 3.05      | 0.0808              | 0.0439  | <i>rstB</i>                | sensor protein RstB                                                                  |
| Cluster_12875  | 20                            | 45                           | 4                                        | 1      | 83   | 98       | NSI+AI           | 3.05      | 0.0808              | 0.0439  | <i>narU</i>                | nitrite extrusion 2 domain protein                                                   |
| Cluster_13363  | 5                             | 2                            | 19                                       | 44     | 21   | 4        | LI               | 3.11      | 0.0780              | 0.0422  | <i>cdtB</i>                | cytolethal distending toxin subunit B                                                |
| Cluster_135012 | 23                            | 33                           | 1                                        | 13     | 96   | 72       | LI               | 4.32      | 0.0378              | 0.0250  |                            | gene 25-like lysozyme family protein                                                 |
| Cluster_135282 | 20                            | 46                           | 4                                        | 0      | 83   | 100      | NSI+AI           | 5.33      | 0.0209              | 0.0116  | <i>rplQ</i>                | ribosomal protein L17                                                                |
| Cluster_136944 | 17                            | 42                           | 7                                        | 4      | 71   | 91       | NSI+AI           | 3.56      | 0.0590              | 0.0381  |                            | phage terminase large subunit family protein                                         |
| Cluster_136953 | 21                            | 28                           | 3                                        | 18     | 88   | 61       | LI               | 4.13      | 0.0420              | 0.0279  |                            | haemolysin expression modulating family protein                                      |
| Cluster_137178 | 4                             | 21                           | 20                                       | 25     | 17   | 46       | NSI+AI           | 4.58      | 0.0324              | 0.0193  |                            | hypothetical protein                                                                 |
| Cluster_13962  | 3                             | 0                            | 21                                       | 46     | 13   | 0        | LI               | 3.35      | 0.0673              | 0.0370  |                            | PLD-like domain protein                                                              |
| Cluster_14417  | 9                             | 4                            | 15                                       | 42     | 38   | 9        | LI               | 6.85      | 0.0088              | 0.0073  |                            | putative predicted protein                                                           |
| Cluster_14423  | 10                            | 5                            | 14                                       | 41     | 42   | 11       | LI               | 7.15      | 0.0075              | 0.0051  |                            | conserved hypothetical protein                                                       |
| Cluster_147686 | 4                             | 1                            | 20                                       | 45     | 17   | 2        | LI               | 3.05      | 0.0808              | 0.0439  |                            | conserved hypothetical protein                                                       |
| Cluster_147687 | 4                             | 1                            | 20                                       | 45     | 17   | 2        | LI               | 3.05      | 0.0808              | 0.0439  |                            | putative membrane protein                                                            |
| Cluster_14793  | 3                             | 0                            | 21                                       | 46     | 13   | 0        | LI               | 3.35      | 0.0673              | 0.0370  |                            | conserved hypothetical protein                                                       |
| Cluster_14794  | 3                             | 0                            | 21                                       | 46     | 13   | 0        | LI               | 3.35      | 0.0673              | 0.0370  |                            | conserved hypothetical protein                                                       |
| Cluster_14795  | 3                             | 0                            | 21                                       | 46     | 13   | 0        | LI               | 3.35      | 0.0673              | 0.0370  |                            | conserved hypothetical protein                                                       |
| Cluster_14796  | 3                             | 0                            | 21                                       | 46     | 13   | 0        | LI               | 3.35      | 0.0673              | 0.0370  | <i>dam</i>                 | DNA adenine methylase family protein                                                 |
| Cluster_14797  | 3                             | 0                            | 21                                       | 46     | 13   | 0        | LI               | 3.35      | 0.0673              | 0.0370  |                            | helix-turn-helix family protein                                                      |
| Cluster_14800  | 3                             | 0                            | 21                                       | 46     | 13   | 0        | LI               | 3.35      | 0.0673              | 0.0370  |                            | conserved hypothetical protein                                                       |
| Cluster_148189 | 5                             | 2                            | 19                                       | 44     | 21   | 4        | LI               | 3.11      | 0.0780              | 0.0422  |                            | cytolethal distending toxin A/C family protein                                       |
| Cluster_148976 | 3                             | 0                            | 21                                       | 46     | 13   | 0        | LI               | 3.35      | 0.0673              | 0.0370  |                            | conserved hypothetical protein                                                       |
| Cluster_148979 | 3                             | 0                            | 21                                       | 46     | 13   | 0        | LI               | 3.35      | 0.0673              | 0.0370  |                            | putative gp16                                                                        |
| Cluster_14998  | 17                            | 15                           | 7                                        | 31     | 71   | 33       | LI               | 7.81      | 0.0052              | 0.0049  |                            | bacteriophage replication gene A family protein                                      |
| Cluster_15006  | 23                            | 33                           | 1                                        | 13     | 96   | 72       | LI               | 4.32      | 0.0378              | 0.0250  |                            | phage major capsid protein, P2 family                                                |
| Cluster_15064  | 3                             | 0                            | 21                                       | 46     | 13   | 0        | LI               | 3.35      | 0.0673              | 0.0370  |                            | conserved hypothetical protein                                                       |
| Cluster_152420 | 20                            | 45                           | 4                                        | 1      | 83   | 98       | NSI+AI           | 3.05      | 0.0808              | 0.0439  |                            | phage major capsid E family protein                                                  |
| Cluster_153994 | 23                            | 33                           | 1                                        | 13     | 96   | 72       | LI               | 4.32      | 0.0378              | 0.0250  |                            | conserved hypothetical protein                                                       |
| Cluster_155747 | 19                            | 45                           | 5                                        | 1      | 79   | 98       | NSI+AI           | 4.83      | 0.0280              | 0.0159  | <i>phnH</i>                | phosphonate C-P lyase system protein PhnH                                            |
| Cluster_163350 | 2                             | 14                           | 22                                       | 32     | 8    | 30       | NSI+AI           | 3.21      | 0.0734              | 0.0410  |                            | conserved hypothetical protein                                                       |
| Cluster_166190 | 7                             | 2                            | 17                                       | 44     | 29   | 4        | LI               | 6.60      | 0.0102              | 0.0060  |                            | phage integrase family protein                                                       |
| Cluster_173822 | 4                             | 1                            | 20                                       | 45     | 17   | 2        | LI               | 3.05      | 0.0808              | 0.0439  |                            | conserved hypothetical protein                                                       |
| Cluster_174674 | 7                             | 4                            | 17                                       | 42     | 29   | 9        | LI               | 3.56      | 0.0590              | 0.0381  |                            | conserved hypothetical protein                                                       |
| Cluster_175599 | 5                             | 2                            | 19                                       | 44     | 21   | 4        | LI               | 3.11      | 0.0780              | 0.0422  | <i>rfbD</i>                | dTDP-4-dehydroharmnose reductase                                                     |
| Cluster_175605 | 6                             | 0                            | 18                                       | 46     | 25   | 0        | LI               | 9.59      | 0.0020              | 0.0010  | <i>rfbA</i>                | glucose-1-phosphate thymidyltransferase                                              |
| Cluster_175612 | 6                             | 1                            | 18                                       | 45     | 25   | 2        | LI               | 6.77      | 0.0093              | 0.0055  |                            | transposase DDE domain protein                                                       |
| Cluster_175618 | 6                             | 1                            | 18                                       | 45     | 25   | 2        | LI               | 6.77      | 0.0093              | 0.0055  |                            | polysaccharide biosynthesis/export family protein                                    |
| Cluster_177488 | 6                             | 2                            | 18                                       | 44     | 25   | 4        | LI               | 4.76      | 0.0291              | 0.0165  | <i>fljC</i>                | flagellin                                                                            |
| Cluster_181608 | 20                            | 26                           | 4                                        | 20     | 83   | 57       | LI               | 3.91      | 0.0479              | 0.0339  |                            | transposase family protein                                                           |
| Cluster_182116 | 4                             | 1                            | 20                                       | 45     | 17   | 2        | LI               | 3.05      | 0.0808              | 0.0439  |                            | conserved hypothetical protein                                                       |
| Cluster_183020 | 4                             | 1                            | 20                                       | 45     | 17   | 2        | LI               | 3.05      | 0.0808              | 0.0439  |                            | hypothetical protein                                                                 |
| Cluster_183172 | 6                             | 1                            | 18                                       | 45     | 25   | 2        | LI               | 6.77      | 0.0093              | 0.0055  |                            | DDE domain protein                                                                   |
| Cluster_183173 | 6                             | 1                            | 18                                       | 45     | 25   | 2        | LI               | 6.77      | 0.0093              | 0.0055  |                            | transposase family protein                                                           |
| Cluster_183381 | 4                             | 1                            | 20                                       | 45     | 17   | 2        | LI               | 3.05      | 0.0808              | 0.0439  |                            | subtilase family protein                                                             |
| Cluster_183988 | 5                             | 2                            | 19                                       | 44     | 21   | 4        | LI               | 3.11      | 0.0780              | 0.0422  |                            | putative transposase                                                                 |
| Cluster_184733 | 19                            | 45                           | 5                                        | 1      | 79   | 98       | NSI+AI           | 4.83      | 0.0280              | 0.0159  | <i>entS</i>                | enterobactin exporter EntS                                                           |
| Cluster_188245 | 18                            | 20                           | 6                                        | 26     | 75   | 43       | LI               | 5.11      | 0.0238              | 0.0219  |                            | conserved hypothetical protein                                                       |
| Cluster_188256 | 0                             | 8                            | 24                                       | 38     | 0    | 17       | NSI+AI           | 3.15      | 0.0759              | 0.0442  |                            | conserved hypothetical protein                                                       |
| Cluster_195799 | 1                             | 11                           | 23                                       | 35     | 4    | 24       | NSI+AI           | 3.05      | 0.0807              | 0.0471  |                            | putative icd-like protein                                                            |
| Cluster_195951 | 21                            | 46                           | 3                                        | 0      | 88   | 100      | NSI+AI           | 3.35      | 0.0673              | 0.0370  |                            | histidine kinase family protein                                                      |
| Cluster_196644 | 17                            | 46                           | 7                                        | 0      | 71   | 100      | NSI+AI           | 11.84     | 0.0006              | 0.0003  | <i>hscA</i>                | fe-S protein assembly chaperone HscA                                                 |
| Cluster_196649 | 20                            | 46                           | 4                                        | 0      | 83   | 100      | NSI+AI           | 5.33      | 0.0209              | 0.0116  | <i>sseA</i>                | 3-mercaptopyruvate sulfurtransferase                                                 |
| Cluster_197373 | 19                            | 45                           | 5                                        | 1      | 79   | 98       | NSI+AI           | 4.83      | 0.0280              | 0.0159  | <i>emrB</i>                | multidrug resistance protein B                                                       |
| Cluster_201168 | 18                            | 45                           | 6                                        | 1      | 75   | 98       | NSI+AI           | 6.77      | 0.0093              | 0.0055  | <i>eutK</i>                | ethanolamine utilization protein EutK                                                |
| Cluster_201403 | 9                             | 4                            | 15                                       | 42     | 38   | 9        | LI               | 6.85      | 0.0088              | 0.0073  |                            | conserved hypothetical protein                                                       |
| Cluster_201731 | 10                            | 4                            | 14                                       | 42     | 42   | 9        | LI               | 8.75      | 0.0031              | 0.0031  |                            | helix-turn-helix, Psa domain protein                                                 |
| Cluster_201738 | 10                            | 4                            | 14                                       | 42     | 42   | 9        | LI               | 8.75      | 0.0031              | 0.0031  |                            | conserved hypothetical protein                                                       |
| Cluster_20292  | 19                            | 44                           | 5                                        | 2      | 79   | 96       | NSI+AI           | 3.11      | 0.0780              | 0.0422  |                            | acetyl xylan esterase family protein                                                 |
| Cluster_208031 | 18                            | 44                           | 6                                        | 2      | 75   | 96       | NSI+AI           | 4.76      | 0.0291              | 0.0165  |                            | substrate binding domain of ABC-type glycine betaine transport system family protein |
| Cluster_208660 | 18                            | 45                           | 6                                        | 1      | 75   | 98       | NSI+AI           | 6.77      | 0.0093              | 0.0055  | <i>dnaX</i>                | DNA polymerase III, subunit gamma and tau                                            |
| Cluster_208864 | 20                            | 45                           | 4                                        | 1      | 83   | 98       | NSI+AI           | 3.05      | 0.0808              | 0.0439  | <i>hypF</i>                | carbamoyltransferase HypF                                                            |
| Cluster_209349 | 19                            | 46                           | 5                                        | 0      | 79   | 100      | NSI+AI           | 7.42      | 0.0065              | 0.0035  | <i>tnaA</i>                | tryptophanase                                                                        |



|                |    |    |    |    |     |     |        |      |        |        |                             |                                                                       |
|----------------|----|----|----|----|-----|-----|--------|------|--------|--------|-----------------------------|-----------------------------------------------------------------------|
| Cluster_209403 | 19 | 46 | 5  | 0  | 79  | 100 | NSI+AI | 7.42 | 0.0065 | 0.0035 | <i>selB</i>                 | selenocysteine-specific translation elongation factor                 |
| Cluster_209404 | 20 | 46 | 4  | 0  | 83  | 100 | NSI+AI | 5.33 | 0.0209 | 0.0116 |                             | iron-containing alcohol dehydrogenase family protein                  |
| Cluster_211001 | 23 | 33 | 1  | 13 | 96  | 72  | LI     | 4.32 | 0.0378 | 0.0250 |                             | phage virion morphogenesis protein                                    |
| Cluster_21139  | 21 | 46 | 3  | 0  | 88  | 100 | NSI+AI | 3.35 | 0.0673 | 0.0370 | <i>caiD</i>                 | carbamoyl-CoA dehydratase                                             |
| Cluster_211547 | 19 | 46 | 5  | 0  | 79  | 100 | NSI+AI | 7.42 | 0.0065 | 0.0035 | <i>dnaE</i>                 | DNA polymerase III, alpha subunit                                     |
| Cluster_21586  | 19 | 45 | 5  | 1  | 79  | 98  | NSI+AI | 4.83 | 0.0280 | 0.0159 | <i>citG</i>                 | triphosphoribosyl-dephospho-CoA synthase CitG                         |
| Cluster_21640  | 18 | 46 | 6  | 0  | 75  | 100 | NSI+AI | 9.59 | 0.0020 | 0.0010 | <i>nagE</i>                 | PTS system, N-acetylglucosamine-specific IIBC component               |
| Cluster_21650  | 20 | 46 | 4  | 0  | 83  | 100 | NSI+AI | 5.33 | 0.0209 | 0.0116 | <i>pgm</i>                  | phosphoglucomutase, alpha-D-glucose phosphate-specific                |
| Cluster_21657  | 21 | 46 | 3  | 0  | 88  | 100 | NSI+AI | 3.35 | 0.0673 | 0.0370 | <i>kdpB</i>                 | K <sup>+</sup> -transporting ATPase, B subunit                        |
| Cluster_217459 | 0  | 10 | 24 | 36 | 0   | 22  | NSI+AI | 4.44 | 0.0351 | 0.0124 |                             | HTH domain protein                                                    |
| Cluster_21749  | 23 | 34 | 1  | 12 | 96  | 74  | LI     | 3.67 | 0.0555 | 0.0270 |                             | conserved hypothetical protein                                        |
| Cluster_218595 | 8  | 5  | 16 | 41 | 33  | 11  | LI     | 3.88 | 0.0488 | 0.0482 | <i>traJ</i>                 | protein TraJ                                                          |
| Cluster_218615 | 20 | 45 | 4  | 1  | 83  | 98  | NSI+AI | 3.05 | 0.0808 | 0.0439 |                             | alpha-2-macroglobulin family protein                                  |
| Cluster_21870  | 19 | 44 | 5  | 2  | 79  | 96  | NSI+AI | 3.11 | 0.0780 | 0.0422 | <i>ssb</i>                  | single-stranded DNA-binding protein                                   |
| Cluster_218768 | 19 | 46 | 5  | 0  | 79  | 100 | NSI+AI | 7.42 | 0.0065 | 0.0035 | <i>dacB</i>                 | D-alanyl-D-alanine carboxypeptidase/D-alanyl-D-alanine-endopeptidase  |
| Cluster_219846 | 21 | 46 | 3  | 0  | 88  | 100 | NSI+AI | 3.35 | 0.0673 | 0.0370 | <i>rutD</i>                 | pyrimidine utilization protein D                                      |
| Cluster_220312 | 23 | 33 | 1  | 13 | 96  | 72  | LI     | 4.32 | 0.0378 | 0.0250 |                             | baseplate J-like family protein                                       |
| Cluster_220402 | 19 | 44 | 5  | 2  | 79  | 96  | NSI+AI | 3.11 | 0.0780 | 0.0422 | <i>air</i>                  | alanine racemase                                                      |
| Cluster_220923 | 19 | 45 | 5  | 1  | 79  | 98  | NSI+AI | 4.83 | 0.0280 | 0.0159 | <i>nuoN</i>                 | NADH-quinone oxidoreductase subunit N                                 |
| Cluster_22096  | 19 | 46 | 5  | 0  | 79  | 100 | NSI+AI | 7.42 | 0.0065 | 0.0035 |                             | AAA-like domain protein                                               |
| Cluster_221263 | 4  | 1  | 20 | 45 | 17  | 2   | LI     | 3.05 | 0.0808 | 0.0439 |                             | conserved hypothetical protein                                        |
| Cluster_221350 | 19 | 45 | 5  | 1  | 79  | 98  | NSI+AI | 4.83 | 0.0280 | 0.0159 | <i>ftsY</i>                 | signal recognition particle-docking protein FtsY                      |
| Cluster_221365 | 20 | 45 | 4  | 1  | 83  | 98  | NSI+AI | 3.05 | 0.0808 | 0.0439 | <i>uggC</i>                 | sn-glycerol-3-phosphate import ATP-binding protein UgpC               |
| Cluster_221813 | 19 | 24 | 5  | 22 | 79  | 52  | LI     | 3.78 | 0.0519 | 0.0386 |                             | conserved hypothetical protein                                        |
| Cluster_221865 | 22 | 30 | 2  | 16 | 92  | 65  | LI     | 4.47 | 0.0344 | 0.0207 |                             | bacterial type II and III secretion system family protein             |
| Cluster_222292 | 4  | 1  | 20 | 45 | 17  | 2   | LI     | 3.05 | 0.0808 | 0.0439 |                             | conserved hypothetical protein                                        |
| Cluster_222331 | 15 | 16 | 9  | 30 | 63  | 35  | LI     | 3.85 | 0.0497 | 0.0419 |                             | phage portal protein, HK97 family                                     |
| Cluster_222333 | 17 | 17 | 7  | 29 | 71  | 37  | LI     | 5.95 | 0.0147 | 0.0113 |                             | phage major capsid protein, HK97 family                               |
| Cluster_222669 | 3  | 0  | 21 | 46 | 13  | 0   | LI     | 3.35 | 0.0673 | 0.0370 |                             | conserved hypothetical protein                                        |
| Cluster_222670 | 3  | 0  | 21 | 46 | 13  | 0   | LI     | 3.35 | 0.0673 | 0.0370 |                             | conserved hypothetical protein                                        |
| Cluster_222671 | 3  | 0  | 21 | 46 | 13  | 0   | LI     | 3.35 | 0.0673 | 0.0370 |                             | conserved hypothetical protein                                        |
| Cluster_222677 | 3  | 0  | 21 | 46 | 13  | 0   | LI     | 3.35 | 0.0673 | 0.0370 |                             | conserved hypothetical protein                                        |
| Cluster_222678 | 3  | 0  | 21 | 46 | 13  | 0   | LI     | 3.35 | 0.0673 | 0.0370 |                             | hypothetical protein                                                  |
| Cluster_222679 | 3  | 0  | 21 | 46 | 13  | 0   | LI     | 3.35 | 0.0673 | 0.0370 |                             | putative yAhA protein                                                 |
| Cluster_222748 | 3  | 0  | 21 | 46 | 13  | 0   | LI     | 3.35 | 0.0673 | 0.0370 |                             | putative ccgAll                                                       |
| Cluster_222761 | 9  | 6  | 15 | 40 | 38  | 13  | LI     | 4.24 | 0.0394 | 0.0300 |                             | putative escherichia coli chi7122 chi7122 genomic chromosome, chi7122 |
| Cluster_222808 | 6  | 1  | 18 | 45 | 25  | 2   | LI     | 6.77 | 0.0093 | 0.0055 |                             | polysaccharide biosynthesis/export family protein                     |
| Cluster_224504 | 20 | 46 | 4  | 0  | 83  | 100 | NSI+AI | 5.33 | 0.0209 | 0.0116 | <i>rodZ</i>                 | cytoskeleton protein RodZ                                             |
| Cluster_230143 | 3  | 0  | 21 | 46 | 13  | 0   | LI     | 3.35 | 0.0673 | 0.0370 |                             | conserved hypothetical protein                                        |
| Cluster_230280 | 4  | 1  | 20 | 45 | 17  | 2   | LI     | 3.05 | 0.0808 | 0.0439 |                             | taurine catabolism dioxygenase Taud, TfdA family protein              |
| Cluster_234123 | 21 | 46 | 3  | 0  | 88  | 100 | NSI+AI | 3.35 | 0.0673 | 0.0370 | <i>tonB</i>                 | protein TonB                                                          |
| Cluster_23468  | 18 | 21 | 6  | 25 | 75  | 46  | LI     | 4.38 | 0.0364 | 0.0238 |                             | phage capsid scaffolding (GPO) serine peptidase family protein        |
| Cluster_23480  | 15 | 17 | 9  | 29 | 63  | 37  | LI     | 3.18 | 0.0745 | 0.0482 |                             | conserved hypothetical protein                                        |
| Cluster_236094 | 5  | 2  | 19 | 44 | 21  | 4   | LI     | 3.11 | 0.0780 | 0.0422 |                             | insA N-terminal domain protein                                        |
| Cluster_236134 | 16 | 14 | 8  | 32 | 67  | 30  | LI     | 7.04 | 0.0080 | 0.0052 | <i>dhfrI</i>                | dihydrofolate reductase type 1                                        |
| Cluster_236296 | 23 | 32 | 1  | 14 | 96  | 70  | LI     | 5.00 | 0.0254 | 0.0130 |                             | ATPase subunit of terminase family protein                            |
| Cluster_236458 | 21 | 46 | 3  | 0  | 88  | 100 | NSI+AI | 3.35 | 0.0673 | 0.0370 | <i>uvrB</i>                 | excinuclease ABC subunit B                                            |
| Cluster_237374 | 21 | 46 | 3  | 0  | 88  | 100 | NSI+AI | 3.35 | 0.0673 | 0.0370 | <i>proS</i>                 | proline-rRNA ligase                                                   |
| Cluster_237804 | 19 | 46 | 5  | 0  | 79  | 100 | NSI+AI | 7.42 | 0.0065 | 0.0035 |                             | nitrate reductase, alpha subunit                                      |
| Cluster_23840  | 6  | 1  | 18 | 45 | 25  | 2   | LI     | 6.77 | 0.0093 | 0.0055 |                             | glycosyl transferase family 2 domain protein                          |
| Cluster_239025 | 7  | 3  | 17 | 43 | 29  | 7   | LI     | 4.88 | 0.0271 | 0.0256 |                             | phage terminase, small subunit, P27 family                            |
| Cluster_239026 | 7  | 3  | 17 | 43 | 29  | 7   | LI     | 4.88 | 0.0271 | 0.0256 |                             | phage Terminase family protein                                        |
| Cluster_239028 | 15 | 16 | 9  | 30 | 63  | 35  | LI     | 3.85 | 0.0497 | 0.0419 |                             | phage portal protein, HK97 family                                     |
| Cluster_240829 | 7  | 1  | 17 | 45 | 29  | 2   | LI     | 8.84 | 0.0029 | 0.0018 |                             | hypothetical protein                                                  |
| Cluster_24188  | 21 | 29 | 3  | 17 | 88  | 63  | LI     | 3.50 | 0.0613 | 0.0496 |                             | conserved hypothetical protein                                        |
| Cluster_242402 | 3  | 0  | 21 | 46 | 13  | 0   | LI     | 3.35 | 0.0673 | 0.0370 |                             | putative membrane protein                                             |
| Cluster_24313  | 3  | 0  | 21 | 46 | 13  | 0   | LI     | 3.35 | 0.0673 | 0.0370 |                             | polysaccharide biosynthesis family protein                            |
| Cluster_24314  | 5  | 0  | 19 | 46 | 21  | 0   | LI     | 7.42 | 0.0065 | 0.0035 | <i>degT/DnrJ/EryC1/StrS</i> | aminotransferase family protein                                       |
| Cluster_24337  | 20 | 45 | 4  | 1  | 83  | 98  | NSI+AI | 3.05 | 0.0808 | 0.0439 |                             | phage portal protein, lambda family                                   |
| Cluster_24348  | 5  | 29 | 19 | 17 | 21  | 63  | NSI+AI | 9.62 | 0.0019 | 0.0010 |                             | phage tail tape measure protein, lambda family                        |
| Cluster_245108 | 18 | 45 | 6  | 1  | 75  | 98  | NSI+AI | 6.77 | 0.0093 | 0.0055 |                             | electron transport complex, RnfABCDGE type, B subunit                 |
| Cluster_245260 | 19 | 46 | 5  | 0  | 79  | 100 | NSI+AI | 7.42 | 0.0065 | 0.0035 | <i>cheA</i>                 | chemotaxis protein CheA                                               |
| Cluster_246425 | 6  | 2  | 18 | 44 | 25  | 4   | LI     | 4.76 | 0.0291 | 0.0165 |                             | conserved hypothetical protein                                        |
| Cluster_246762 | 20 | 45 | 4  | 1  | 83  | 98  | NSI+AI | 3.05 | 0.0808 | 0.0439 | <i>ligB</i>                 | DNA ligase B                                                          |
| Cluster_246821 | 4  | 1  | 20 | 45 | 17  | 2   | LI     | 3.05 | 0.0808 | 0.0439 |                             | helix-turn-helix domain protein                                       |
| Cluster_247242 | 3  | 0  | 21 | 46 | 13  | 0   | LI     | 3.35 | 0.0673 | 0.0370 |                             | conserved hypothetical protein                                        |
| Cluster_247243 | 3  | 0  | 21 | 46 | 13  | 0   | LI     | 3.35 | 0.0673 | 0.0370 |                             | cobQ/CobB/MinD/ParA nucleotide binding domain protein                 |
| Cluster_247315 | 3  | 0  | 21 | 46 | 13  | 0   | LI     | 3.35 | 0.0673 | 0.0370 |                             | conserved hypothetical protein                                        |
| Cluster_247317 | 3  | 0  | 21 | 46 | 13  | 0   | LI     | 3.35 | 0.0673 | 0.0370 |                             | toxin-antitoxin system, antitoxin component, Xre family               |
| Cluster_247403 | 5  | 0  | 19 | 46 | 21  | 0   | LI     | 7.42 | 0.0065 | 0.0035 |                             | glycosyl transferase 2 family protein                                 |
| Cluster_247837 | 6  | 1  | 18 | 45 | 25  | 2   | LI     | 6.77 | 0.0093 | 0.0055 |                             | putative domain protein                                               |
| Cluster_24791  | 20 | 45 | 4  | 1  | 83  | 98  | NSI+AI | 3.05 | 0.0808 | 0.0439 | <i>yjiY</i>                 | inner membrane protein YjiY                                           |
| Cluster_248983 | 21 | 46 | 3  | 0  | 88  | 100 | NSI+AI | 3.35 | 0.0673 | 0.0370 | <i>pepB</i>                 | peptidase B                                                           |
| Cluster_249336 | 13 | 13 | 11 | 33 | 54  | 28  | LI     | 3.49 | 0.0617 | 0.0406 |                             | zonular occludens toxin family protein                                |
| Cluster_252396 | 20 | 45 | 4  | 1  | 83  | 98  | NSI+AI | 3.05 | 0.0808 | 0.0439 |                             | tail attachment protein                                               |
| Cluster_252971 | 5  | 2  | 19 | 44 | 21  | 4   | LI     | 3.11 | 0.0780 | 0.0422 |                             | HNH endonuclease family protein                                       |
| Cluster_252976 | 17 | 17 | 7  | 29 | 71  | 37  | LI     | 5.95 | 0.0147 | 0.0113 |                             | phage prohead protease, HK97 family                                   |
| Cluster_254547 | 17 | 19 | 7  | 27 | 71  | 41  | LI     | 4.39 | 0.0362 | 0.0245 |                             | bacteriophage lysis family protein                                    |
| Cluster_257914 | 24 | 35 | 0  | 11 | 100 | 76  | LI     | 5.12 | 0.0236 | 0.0120 | <i>cadC</i>                 | transcriptional activator CadC                                        |
| Cluster_258318 | 21 | 46 | 3  | 0  | 88  | 100 | NSI+AI | 3.35 | 0.0673 | 0.0370 |                             | MFS transporter, phenyl propionate permease family protein            |
| Cluster_258452 | 19 | 45 | 5  | 1  | 79  | 98  | NSI+AI | 4.83 | 0.0280 | 0.0159 | <i>malP</i>                 | maltoedoxin phosphorylase                                             |
| Cluster_259070 | 20 | 46 | 4  | 0  | 83  | 100 | NSI+AI | 5.33 | 0.0209 | 0.0116 | <i>mfa</i>                  | transcription-repair coupling factor                                  |
| Cluster_259563 | 18 | 45 | 6  | 1  | 75  | 98  | NSI+AI | 6.77 | 0.0093 | 0.0055 |                             | MASE1 family protein                                                  |
| Cluster_261646 | 22 | 30 | 2  | 16 | 92  | 65  | LI     | 4.47 | 0.0344 | 0.0207 |                             | phage/conjugal plasmid C-4 type zinc finger , TraR family protein     |
| Cluster_261814 | 6  | 2  | 18 | 44 | 25  | 4   | LI     | 4.76 | 0.0291 | 0.0165 |                             | conserved hypothetical protein                                        |
| Cluster_262069 | 12 | 11 | 12 | 35 | 50  | 24  | LI     | 3.75 | 0.0527 | 0.0348 |                             | istB-like ATP binding family protein                                  |
| Cluster_263937 | 9  | 4  | 15 | 42 | 38  | 9   | LI     | 6.85 | 0.0088 | 0.0073 |                             | conserved hypothetical protein                                        |
| Cluster_263945 | 7  | 2  | 17 | 44 | 29  | 4   | LI     | 6.60 | 0.0102 | 0.0060 |                             | conserved hypothetical protein                                        |
| Cluster_263946 | 7  | 2  | 17 | 44 | 29  | 4   | LI     | 6.60 | 0.0102 | 0.0060 |                             | phage major capsid E family protein                                   |
| Cluster_263948 | 7  | 2  | 17 | 44 | 29  | 4   | LI     | 6.60 | 0.0102 | 0.0060 |                             | conserved hypothetical protein                                        |
| Cluster_264521 | 19 | 46 | 5  | 0  | 79  | 100 | NSI+AI | 7.42 | 0.0065 | 0.0035 |                             | conserved hypothetical protein                                        |
| Cluster_264826 | 19 | 24 | 5  | 22 | 79  | 52  | LI     | 3.78 | 0.0519 | 0.0386 |                             | yagB/YeeU/Yjz family protein                                          |
| Cluster_265225 | 18 | 46 | 6  | 0  | 75  | 100 | NSI+AI | 9.59 | 0.0020 | 0.0010 |                             | PRD domain protein                                                    |
| Cluster_265241 | 21 | 46 | 3  | 0  | 88  | 100 | NSI+AI | 3.35 | 0.0673 | 0.0370 | <i>purL</i>                 | phosphoribosylformylglycinamide synthase                              |

|                |    |    |    |    |    |     |        |      |        |        |             |                                                                                |
|----------------|----|----|----|----|----|-----|--------|------|--------|--------|-------------|--------------------------------------------------------------------------------|
| Cluster_275815 | 18 | 44 | 6  | 2  | 75 | 96  | NSI+AI | 4.76 | 0.0291 | 0.0165 | <i>gmm</i>  | GDP-mannose mannosyl hydrolase                                                 |
| Cluster_276292 | 19 | 45 | 5  | 1  | 79 | 98  | NSI+AI | 4.83 | 0.0280 | 0.0159 |             | stress-induced bacterial acidophilic repeat motif family protein               |
| Cluster_277010 | 20 | 26 | 4  | 20 | 83 | 57  | LI     | 3.91 | 0.0479 | 0.0339 |             | transposase DDE domain protein                                                 |
| Cluster_277146 | 21 | 46 | 3  | 0  | 88 | 100 | NSI+AI | 3.35 | 0.0673 | 0.0370 | <i>rsmH</i> | 16S rRNA (cytosine(1402)-N(4))-methyltransferase                               |
| Cluster_280171 | 18 | 46 | 6  | 0  | 75 | 100 | NSI+AI | 9.59 | 0.0020 | 0.0010 | <i>tatD</i> | tat-linked quality control protein TatD                                        |
| Cluster_282548 | 8  | 5  | 16 | 41 | 33 | 11  | LI     | 3.88 | 0.0488 | 0.0482 |             | putative predicted protein                                                     |
| Cluster_283709 | 19 | 44 | 5  | 2  | 79 | 96  | NSI+AI | 3.11 | 0.0780 | 0.0422 | <i>acnA</i> | aconitate hydratase 1                                                          |
| Cluster_284853 | 3  | 0  | 21 | 46 | 13 | 0   | LI     | 3.35 | 0.0673 | 0.0370 |             | AAA domain protein                                                             |
| Cluster_284866 | 7  | 4  | 17 | 42 | 29 | 9   | LI     | 3.56 | 0.0590 | 0.0381 |             | bacterial regulatory, tetR family protein                                      |
| Cluster_286129 | 23 | 33 | 1  | 13 | 96 | 72  | LI     | 4.32 | 0.0378 | 0.0250 |             | P2 phage tail completion R family protein                                      |
| Cluster_286226 | 19 | 46 | 5  | 0  | 79 | 100 | NSI+AI | 7.42 | 0.0065 | 0.0035 | <i>cybH</i> | ni/Fe-hydrogenase, b-type cytochrome subunit                                   |
| Cluster_286879 | 6  | 1  | 18 | 45 | 25 | 2   | LI     | 6.77 | 0.0093 | 0.0055 |             | conserved hypothetical protein                                                 |
| Cluster_286880 | 3  | 0  | 21 | 46 | 13 | 0   | LI     | 3.35 | 0.0673 | 0.0370 |             | hypothetical protein                                                           |
| Cluster_286883 | 5  | 0  | 19 | 46 | 21 | 0   | LI     | 7.42 | 0.0065 | 0.0035 |             | acetyltransferase domain protein                                               |
| Cluster_287268 | 11 | 9  | 13 | 37 | 46 | 20  | LI     | 4.12 | 0.0423 | 0.0278 |             | conserved hypothetical protein                                                 |
| Cluster_287304 | 21 | 46 | 3  | 0  | 88 | 100 | NSI+AI | 3.35 | 0.0673 | 0.0370 |             | branched-chain amino acid transport system / permease component family protein |
| Cluster_28951  | 4  | 1  | 20 | 45 | 17 | 2   | LI     | 3.05 | 0.0808 | 0.0439 |             | hypothetical protein                                                           |
| Cluster_289981 | 12 | 11 | 12 | 35 | 50 | 24  | LI     | 3.75 | 0.0527 | 0.0348 |             | integrase core domain protein                                                  |
| Cluster_290242 | 18 | 44 | 6  | 2  | 75 | 96  | NSI+AI | 4.76 | 0.0291 | 0.0165 | <i>yphF</i> | ABC transporter periplasmic-binding protein YphF                               |
| Cluster_290560 | 19 | 46 | 5  | 0  | 79 | 100 | NSI+AI | 7.42 | 0.0065 | 0.0035 |             | AAA-like domain protein                                                        |
| Cluster_291813 | 12 | 10 | 12 | 36 | 50 | 22  | LI     | 4.61 | 0.0318 | 0.0285 |             | conserved hypothetical protein                                                 |
| Cluster_294535 | 20 | 45 | 4  | 1  | 83 | 98  | NSI+AI | 3.05 | 0.0808 | 0.0439 | <i>serB</i> | phosphoserine phosphatase SerB                                                 |
| Cluster_29582  | 6  | 2  | 18 | 44 | 25 | 4   | LI     | 6.76 | 0.0291 | 0.0165 |             | HNH endonuclease family protein                                                |
| Cluster_295885 | 18 | 45 | 6  | 1  | 75 | 98  | NSI+AI | 4.77 | 0.0093 | 0.0055 |             | acetyltransferase domain protein                                               |
| Cluster_296132 | 5  | 22 | 19 | 24 | 21 | 48  | NSI+AI | 3.78 | 0.0519 | 0.0386 |             | ogr/Delta-like zinc finger family protein                                      |
| Cluster_301782 | 5  | 22 | 19 | 24 | 21 | 48  | NSI+AI | 3.78 | 0.0519 | 0.0386 |             | major tail sheath protein                                                      |
| Cluster_301785 | 4  | 22 | 20 | 24 | 17 | 48  | NSI+AI | 5.29 | 0.0214 | 0.0179 |             | phage tail tape measure protein, TP901 family, core region                     |
| Cluster_305186 | 5  | 22 | 19 | 24 | 21 | 48  | NSI+AI | 3.78 | 0.0519 | 0.0386 |             | phage P2 GpU family protein                                                    |
| Cluster_307627 | 2  | 14 | 22 | 32 | 8  | 30  | NSI+AI | 3.21 | 0.0734 | 0.0410 |             | conserved hypothetical protein                                                 |
| Cluster_312709 | 6  | 2  | 18 | 44 | 25 | 4   | LI     | 4.76 | 0.0291 | 0.0165 |             | amino acid permease family protein                                             |
| Cluster_313189 | 23 | 33 | 1  | 13 | 96 | 72  | LI     | 4.32 | 0.0378 | 0.0250 |             | putative predicted protein                                                     |
| Cluster_313761 | 9  | 4  | 15 | 42 | 38 | 9   | LI     | 6.85 | 0.0088 | 0.0073 |             | HNH endonuclease family protein                                                |
| Cluster_31447  | 20 | 45 | 4  | 1  | 83 | 98  | NSI+AI | 3.05 | 0.0808 | 0.0439 |             | phosphotransferase enzyme family protein                                       |
| Cluster_314938 | 21 | 46 | 3  | 0  | 88 | 100 | NSI+AI | 3.35 | 0.0673 | 0.0370 | <i>murE</i> | UDP-N-acetylmuramoyl-L-alanyl-D-glutamate-2,6-diaminopimelate ligase           |
| Cluster_315743 | 19 | 46 | 5  | 0  | 79 | 100 | NSI+AI | 7.42 | 0.0065 | 0.0035 | <i>ycdY</i> | chaperone protein YcdY                                                         |
| Cluster_315801 | 2  | 16 | 22 | 30 | 8  | 35  | NSI+AI | 4.47 | 0.0344 | 0.0207 |             | phage tail protein I                                                           |
| Cluster_316170 | 0  | 8  | 24 | 38 | 0  | 17  | NSI+AI | 3.15 | 0.0759 | 0.0442 |             | putative predicted protein                                                     |
| Cluster_317131 | 1  | 13 | 23 | 33 | 4  | 28  | NSI+AI | 4.32 | 0.0378 | 0.0250 |             | conserved hypothetical protein                                                 |
| Cluster_317219 | 20 | 45 | 4  | 1  | 83 | 98  | NSI+AI | 3.05 | 0.0808 | 0.0439 | <i>shp</i>  | head decoration protein                                                        |
| Cluster_32291  | 18 | 46 | 6  | 0  | 75 | 100 | NSI+AI | 9.59 | 0.0020 | 0.0010 | <i>dcd</i>  | deoxycytidine triphosphate deaminase                                           |
| Cluster_322922 | 15 | 16 | 9  | 30 | 63 | 35  | LI     | 3.85 | 0.0497 | 0.0419 |             | lysis S family protein                                                         |
| Cluster_324957 | 5  | 2  | 19 | 44 | 21 | 4   | LI     | 3.11 | 0.0780 | 0.0422 |             | cytolethal distending toxin A/C family protein                                 |
| Cluster_326910 | 22 | 29 | 2  | 17 | 92 | 63  | LI     | 5.17 | 0.0230 | 0.0114 |             | hydantoinase/oxoprolinase family protein                                       |
| Cluster_327168 | 18 | 22 | 6  | 24 | 75 | 48  | LI     | 3.71 | 0.0541 | 0.0418 |             | helix-turn-helix domain protein                                                |
| Cluster_328365 | 21 | 28 | 3  | 18 | 88 | 61  | LI     | 4.13 | 0.0420 | 0.0279 |             | hypothetical protein                                                           |
| Cluster_329513 | 21 | 46 | 3  | 0  | 88 | 100 | NSI+AI | 3.35 | 0.0673 | 0.0370 |             | macB-like periplasmic core domain protein                                      |
| Cluster_330511 | 22 | 31 | 2  | 15 | 92 | 67  | LI     | 3.82 | 0.0506 | 0.0380 |             | phage major tail tube protein                                                  |
| Cluster_332291 | 23 | 33 | 1  | 13 | 96 | 72  | LI     | 4.32 | 0.0378 | 0.0250 |             | phage small terminase subunit                                                  |
| Cluster_333715 | 19 | 45 | 5  | 1  | 79 | 98  | NSI+AI | 4.83 | 0.0280 | 0.0159 | <i>dinI</i> | DNA-damage-inducible protein I                                                 |
| Cluster_335571 | 21 | 46 | 3  | 0  | 88 | 100 | NSI+AI | 3.35 | 0.0673 | 0.0370 | <i>cydA</i> | cytochrome d ubiquinol oxidase subunit 1                                       |
| Cluster_335585 | 19 | 46 | 5  | 0  | 79 | 100 | NSI+AI | 7.42 | 0.0065 | 0.0035 |             | ybgS-like family protein                                                       |
| Cluster_342277 | 23 | 33 | 1  | 13 | 96 | 72  | LI     | 4.32 | 0.0378 | 0.0250 |             | ogr/Delta-like zinc finger family protein                                      |
| Cluster_342430 | 21 | 28 | 3  | 18 | 88 | 61  | LI     | 4.13 | 0.0420 | 0.0279 |             | conserved hypothetical protein                                                 |
| Cluster_342998 | 17 | 18 | 7  | 28 | 71 | 39  | LI     | 5.14 | 0.0234 | 0.0224 |             | phage tail protein I                                                           |
| Cluster_343372 | 20 | 46 | 4  | 0  | 83 | 100 | NSI+AI | 5.33 | 0.0209 | 0.0116 | <i>leuB</i> | 3-isopropylmalate dehydrogenase                                                |
| Cluster_343399 | 23 | 32 | 1  | 14 | 96 | 70  | LI     | 5.00 | 0.0254 | 0.0130 |             | phage P2 GpU family protein                                                    |
| Cluster_345283 | 19 | 45 | 5  | 1  | 79 | 98  | NSI+AI | 4.83 | 0.0280 | 0.0159 |             | carbon-nitrogen hydrolase family protein                                       |
| Cluster_346239 | 6  | 2  | 18 | 44 | 25 | 4   | LI     | 4.76 | 0.0291 | 0.0165 |             | HNH endonuclease family protein                                                |
| Cluster_346478 | 21 | 25 | 3  | 21 | 88 | 54  | LI     | 6.29 | 0.0121 | 0.0074 |             | conserved hypothetical protein                                                 |
| Cluster_347409 | 23 | 31 | 1  | 15 | 96 | 67  | LI     | 5.71 | 0.0168 | 0.0069 |             | phage tail sheath family protein                                               |
| Cluster_347413 | 23 | 33 | 1  | 13 | 96 | 72  | LI     | 4.32 | 0.0378 | 0.0250 |             | hok/gef family protein                                                         |
| Cluster_347784 | 23 | 33 | 1  | 13 | 96 | 72  | LI     | 4.32 | 0.0378 | 0.0250 |             | phage holin family protein                                                     |
| Cluster_348353 | 19 | 45 | 5  | 1  | 79 | 98  | NSI+AI | 4.83 | 0.0280 | 0.0159 | <i>yajR</i> | inner membrane transport protein YajR                                          |
| Cluster_348774 | 23 | 33 | 1  | 13 | 96 | 72  | LI     | 4.32 | 0.0378 | 0.0250 |             | D-alanyl-D-alanine carboxypeptidase family protein                             |
| Cluster_36312  | 2  | 15 | 22 | 31 | 8  | 33  | NSI+AI | 3.82 | 0.0506 | 0.0380 |             | ethanolamine utilization - propanediol utilization family protein              |
| Cluster_3723   | 0  | 8  | 24 | 38 | 0  | 17  | NSI+AI | 3.15 | 0.0759 | 0.0442 |             | conserved hypothetical protein                                                 |
| Cluster_43613  | 15 | 16 | 9  | 30 | 63 | 35  | LI     | 3.85 | 0.0497 | 0.0419 |             | phage gp6-like head-tail connector family protein                              |
| Cluster_44635  | 17 | 42 | 7  | 4  | 71 | 91  | NSI+AI | 3.56 | 0.0590 | 0.0381 |             | type III secretion - HrpO family protein                                       |
| Cluster_46213  | 3  | 19 | 21 | 27 | 13 | 41  | NSI+AI | 4.81 | 0.0283 | 0.0157 |             | putative transmembrane protein                                                 |
| Cluster_4706   | 20 | 45 | 4  | 1  | 83 | 98  | NSI+AI | 3.05 | 0.0808 | 0.0439 |             | minor tail protein U                                                           |
| Cluster_5054   | 19 | 45 | 5  | 1  | 79 | 98  | NSI+AI | 4.83 | 0.0280 | 0.0159 | <i>ptsP</i> | uracil-xanthine permease family protein                                        |
| Cluster_51806  | 19 | 46 | 5  | 0  | 79 | 100 | NSI+AI | 7.42 | 0.0065 | 0.0035 |             | phosphoenolpyruvate-protein phosphotransferase                                 |
| Cluster_52075  | 5  | 2  | 19 | 44 | 21 | 4   | LI     | 3.11 | 0.0780 | 0.0422 |             | type I restriction modification DNA specificity domain protein                 |
| Cluster_5286   | 19 | 46 | 5  | 0  | 79 | 100 | NSI+AI | 7.42 | 0.0065 | 0.0035 | <i>atpF</i> | ATP synthase FO, B subunit                                                     |
| Cluster_53578  | 22 | 31 | 2  | 15 | 92 | 67  | LI     | 3.82 | 0.0506 | 0.0380 |             | putative protein                                                               |
| Cluster_56841  | 13 | 13 | 11 | 33 | 54 | 28  | LI     | 3.49 | 0.0617 | 0.0406 |             | putative membrane protein                                                      |
| Cluster_57580  | 21 | 46 | 3  | 0  | 88 | 100 | NSI+AI | 3.35 | 0.0673 | 0.0370 |             | tonB-dependent siderophore receptor family protein                             |
| Cluster_58271  | 9  | 4  | 15 | 42 | 38 | 9   | LI     | 6.85 | 0.0088 | 0.0073 |             | conserved hypothetical protein                                                 |
| Cluster_59004  | 17 | 17 | 7  | 29 | 71 | 37  | LI     | 5.95 | 0.0147 | 0.0113 |             | phage prohead protease, HK97 family                                            |
| Cluster_61005  | 20 | 46 | 4  | 0  | 83 | 100 | NSI+AI | 5.33 | 0.0209 | 0.0116 |             | conserved hypothetical protein                                                 |
| Cluster_64413  | 0  | 8  | 24 | 38 | 0  | 17  | NSI+AI | 3.15 | 0.0759 | 0.0442 |             | phosphoadenosine phosphosulfate reductase family protein                       |
| Cluster_66669  | 7  | 4  | 17 | 42 | 29 | 9   | LI     | 3.56 | 0.0590 | 0.0381 |             | conserved hypothetical protein                                                 |
| Cluster_68745  | 23 | 33 | 1  | 13 | 96 | 72  | LI     | 4.32 | 0.0378 | 0.0250 |             | phage portal protein, PBSX family                                              |
| Cluster_70295  | 4  | 1  | 20 | 45 | 17 | 2   | LI     | 3.05 | 0.0808 | 0.0439 |             | conserved hypothetical protein                                                 |
| Cluster_70300  | 4  | 1  | 20 | 45 | 17 | 2   | LI     | 3.05 | 0.0808 | 0.0439 |             | conserved hypothetical protein                                                 |
| Cluster_73598  | 6  | 2  | 18 | 44 | 25 | 4   | LI     | 4.76 | 0.0291 | 0.0165 |             | conserved hypothetical protein                                                 |
| Cluster_73967  | 23 | 33 | 1  | 13 | 96 | 72  | LI     | 4.32 | 0.0378 | 0.0250 |             | phage Tail Protein X family protein                                            |
| Cluster_74186  | 6  | 2  | 18 | 44 | 25 | 4   | LI     | 4.76 | 0.0291 | 0.0165 |             | helix-turn-helix domain protein                                                |
| Cluster_74247  | 3  | 0  | 21 | 46 | 13 | 0   | LI     | 3.35 | 0.0673 | 0.0370 |             | dnaJ domain protein                                                            |
| Cluster_74249  | 3  | 0  | 21 | 46 | 13 | 0   | LI     | 3.35 | 0.0673 | 0.0370 |             | putative yaiB protein                                                          |
| Cluster_74250  | 3  | 0  | 21 | 46 | 13 | 0   | LI     | 3.35 | 0.0673 | 0.0370 |             | putative yaiA protein                                                          |
| Cluster_74254  | 3  | 0  | 21 | 46 | 13 | 0   | LI     | 3.35 | 0.0673 | 0.0370 |             | conserved hypothetical protein                                                 |
| Cluster_74420  | 19 | 18 | 5  | 28 | 79 | 39  | LI     | 8.60 | 0.0034 | 0.0022 |             | conserved hypothetical protein                                                 |
| Cluster_75095  | 5  | 22 | 19 | 24 | 21 | 48  | NSI+AI | 3.78 | 0.0519 | 0.0386 |             | phage major tail tube protein                                                  |
| Cluster_75099  | 5  | 22 | 19 | 24 | 21 | 48  | NSI+AI | 3.78 | 0.0519 | 0.0386 |             | ph                                                                             |

|               |    |    |    |    |    |     |        |      |        |        |             |                                              |
|---------------|----|----|----|----|----|-----|--------|------|--------|--------|-------------|----------------------------------------------|
| Cluster_82353 | 22 | 30 | 2  | 16 | 92 | 65  | LI     | 4.47 | 0.0344 | 0.0207 |             | phage late control gene D family protein     |
| Cluster_82835 | 16 | 17 | 8  | 29 | 67 | 37  | LI     | 4.46 | 0.0347 | 0.0240 |             | conserved hypothetical protein               |
| Cluster_83084 | 19 | 46 | 5  | 0  | 79 | 100 | NSI+AI | 7.42 | 0.0065 | 0.0035 | <i>purD</i> | phosphoribosylamine-glycine ligase           |
| Cluster_83254 | 6  | 1  | 18 | 45 | 25 | 2   | LI     | 6.77 | 0.0093 | 0.0055 |             | glycosyl transferases group 1 family protein |
| Cluster_83414 | 3  | 0  | 21 | 46 | 13 | 0   | LI     | 3.35 | 0.0673 | 0.0370 |             | conserved hypothetical protein               |
| Cluster_83418 | 3  | 0  | 21 | 46 | 13 | 0   | LI     | 3.35 | 0.0673 | 0.0370 |             | hypothetical protein                         |
| Cluster_83927 | 6  | 0  | 18 | 46 | 25 | 0   | LI     | 9.59 | 0.0020 | 0.0010 | <i>fdtA</i> | dTDP-6-deoxy-3,4-keto-hexulose isomerase     |
| Cluster_83929 | 6  | 0  | 18 | 46 | 25 | 0   | LI     | 9.59 | 0.0020 | 0.0010 | <i>rfbB</i> | dTDP-glucose 4,6-dehydratase                 |
| Cluster_84211 | 15 | 16 | 9  | 30 | 63 | 35  | LI     | 3.85 | 0.0497 | 0.0419 |             | conserved hypothetical protein               |
| Cluster_84374 | 19 | 44 | 5  | 2  | 79 | 96  | NSI+AI | 3.11 | 0.0780 | 0.0422 |             | transglycosylase SLT domain protein          |
| Cluster_87728 | 19 | 46 | 5  | 0  | 79 | 100 | NSI+AI | 7.42 | 0.0065 | 0.0035 | <i>phrB</i> | deoxyribodipyrimidine photo-lyase            |
| Cluster_89114 | 21 | 46 | 3  | 0  | 88 | 100 | NSI+AI | 3.35 | 0.0673 | 0.0370 | <i>trpD</i> | anthranilate synthase component II           |
| Cluster_89392 | 21 | 46 | 3  | 0  | 88 | 100 | NSI+AI | 3.35 | 0.0673 | 0.0370 |             | NADPH-dependent FMN reductase family protein |
| Cluster_90723 | 20 | 45 | 4  | 1  | 83 | 98  | NSI+AI | 3.05 | 0.0808 | 0.0439 | <i>grxB</i> | glutaredoxin, GrxB family                    |
| Cluster_92542 | 0  | 9  | 24 | 37 | 0  | 20  | NSI+AI | 3.78 | 0.0518 | 0.0230 | <i>espS</i> | putative t3SS effector protein EspS          |
| Cluster_93726 | 19 | 46 | 5  | 0  | 79 | 100 | NSI+AI | 7.42 | 0.0065 | 0.0035 | <i>tolA</i> | protein TolA                                 |
| Cluster_97263 | 19 | 45 | 5  | 1  | 79 | 98  | NSI+AI | 4.83 | 0.0280 | 0.0159 | <i>cadA</i> | cadmium-translocating P-type ATPase          |
| Cluster_97497 | 19 | 45 | 5  | 1  | 79 | 98  | NSI+AI | 4.83 | 0.0280 | 0.0159 | <i>tolA</i> | protein TolA                                 |
| Cluster_99113 | 16 | 16 | 8  | 30 | 67 | 35  | LI     | 5.24 | 0.0221 | 0.0133 |             | putative membrane protein                    |
| Cluster_99362 | 14 | 13 | 10 | 33 | 58 | 28  | LI     | 4.82 | 0.0282 | 0.0202 |             | resolvase, N terminal domain protein         |

<sup>a</sup>Genes were grouped into gene clusters using a "stringent" clustering threshold of  $\geq 90\%$  nucleotide identity.

<sup>b</sup>Gene clusters identified as "present" have a TBLASTN LS-BSR  $\geq 0.9$ , while those that are "absent" have a TBLASTN LS-BSR  $< 0.9$ .

<sup>c</sup>Clinical outcomes are classified as lethal (LI), non-lethal symptomatic (NSI), and asymptomatic (AI).

**Table S5.** Genes identified by LS-BSR that are significantly correlated with symptomatic, asymptomatic, lethal, or non-lethal clinical outcomes for the 61 typical EPEC genomes analyzed using a stringent clustering threshold

| Cluster ID     | No. of Genomes                |                              | Percentage of Genomes Containing Cluster |    |           | Chi-squared test |          | Fisher's exact test |        | Gene ID | Predicted Protein Function                                      |
|----------------|-------------------------------|------------------------------|------------------------------------------|----|-----------|------------------|----------|---------------------|--------|---------|-----------------------------------------------------------------|
|                | Present (≥0.9) <sup>a,b</sup> | Absent (<0.9) <sup>a,b</sup> | LI+NSI                                   | AI | Greater % | statistic        | p-value  | p-value             |        |         |                                                                 |
|                | LI+NSI                        | AI                           | LI+NSI                                   | AI | % LI+NSI  | % AI             | % LI+NSI | % AI                |        |         |                                                                 |
| Cluster_138051 | 32                            | 4                            | 12                                       | 13 | 73        | 24               | LI+NSI   | 10.32               | 0.0013 | 0.0010  | lysis S family protein                                          |
| Cluster_266373 | 32                            | 4                            | 12                                       | 13 | 73        | 24               | LI+NSI   | 10.32               | 0.0013 | 0.0010  | lysis S family protein                                          |
| Cluster_34074  | 32                            | 4                            | 12                                       | 13 | 73        | 24               | LI+NSI   | 10.32               | 0.0013 | 0.0010  | lysis S family protein                                          |
| Cluster_296966 | 0                             | 5                            | 44                                       | 12 | 0         | 29               | AI       | 10.46               | 0.0012 | 0.0010  | conserved hypothetical protein                                  |
| Cluster_310837 | 0                             | 5                            | 44                                       | 12 | 0         | 29               | AI       | 10.46               | 0.0012 | 0.0010  | killing protein KiIR                                            |
| Cluster_318890 | 0                             | 5                            | 44                                       | 12 | 0         | 29               | AI       | 10.46               | 0.0012 | 0.0010  | nucleoside transporter family protein                           |
| Cluster_318894 | 0                             | 5                            | 44                                       | 12 | 0         | 29               | AI       | 10.46               | 0.0012 | 0.0010  | lysR substrate binding domain protein                           |
| Cluster_185869 | 2                             | 7                            | 42                                       | 10 | 5         | 41               | AI       | 10.33               | 0.0013 | 0.0011  | transposase family protein                                      |
| Cluster_178274 | 43                            | 11                           | 1                                        | 6  | 98        | 65               | LI+NSI   | 10.11               | 0.0015 | 0.0013  | conserved hypothetical protein                                  |
| Cluster_261591 | 31                            | 4                            | 13                                       | 13 | 70        | 24               | LI+NSI   | 9.21                | 0.0024 | 0.0013  | methyltransferase domain protein                                |
| Cluster_321224 | 4                             | 8                            | 40                                       | 9  | 9         | 47               | AI       | 8.91                | 0.0028 | 0.0021  | conserved hypothetical protein                                  |
| Cluster_198519 | 6                             | 9                            | 38                                       | 8  | 14        | 53               | AI       | 8.21                | 0.0042 | 0.0028  | transposase family protein                                      |
| Cluster_268703 | 6                             | 9                            | 38                                       | 8  | 14        | 53               | AI       | 8.21                | 0.0042 | 0.0028  | putative non-LEE-encoded effector EspJ                          |
| Cluster_153717 | 7                             | 10                           | 37                                       | 7  | 16        | 59               | AI       | 9.20                | 0.0024 | 0.0028  | lipopolysaccharide core heptose(II) kinase RfaY                 |
| Cluster_31976  | 7                             | 10                           | 37                                       | 7  | 16        | 59               | AI       | 9.20                | 0.0024 | 0.0028  | lipopolysaccharide core heptose(II) kinase RfaY                 |
| Cluster_4527   | 41                            | 10                           | 3                                        | 7  | 93        | 59               | LI+NSI   | 8.20                | 0.0042 | 0.0031  | tail attachment protein                                         |
| Cluster_12327  | 8                             | 10                           | 36                                       | 7  | 18        | 59               | AI       | 7.88                | 0.0050 | 0.0038  | putative prophage protein                                       |
| Cluster_169965 | 8                             | 10                           | 36                                       | 7  | 18        | 59               | AI       | 7.88                | 0.0050 | 0.0038  | ogr/Delta-like zinc finger family protein                       |
| Cluster_200453 | 8                             | 10                           | 36                                       | 7  | 18        | 59               | AI       | 7.88                | 0.0050 | 0.0038  | putative derepression protein                                   |
| Cluster_271578 | 8                             | 10                           | 36                                       | 7  | 18        | 59               | AI       | 7.88                | 0.0050 | 0.0038  | conserved hypothetical protein                                  |
| Cluster_55403  | 8                             | 10                           | 36                                       | 7  | 18        | 59               | AI       | 7.88                | 0.0050 | 0.0038  | helix-turn-helix domain protein                                 |
| Cluster_57003  | 8                             | 10                           | 36                                       | 7  | 18        | 59               | AI       | 7.88                | 0.0050 | 0.0038  | putative phage immunity repressor protein                       |
| Cluster_34159  | 23                            | 2                            | 21                                       | 15 | 52        | 12               | LI+NSI   | 6.73                | 0.0095 | 0.0041  | conserved hypothetical protein                                  |
| Cluster_230986 | 2                             | 6                            | 42                                       | 11 | 5         | 35               | AI       | 7.66                | 0.0057 | 0.0043  | glucose-1-phosphate thymidyltransferase                         |
| Cluster_168917 | 0                             | 4                            | 44                                       | 13 | 0         | 24               | AI       | 7.57                | 0.0059 | 0.0046  | nucleoside 2-deoxyribosyltransferase family protein             |
| Cluster_321885 | 0                             | 4                            | 44                                       | 13 | 0         | 24               | AI       | 7.57                | 0.0059 | 0.0046  | conserved hypothetical protein                                  |
| Cluster_321886 | 0                             | 4                            | 44                                       | 13 | 0         | 24               | AI       | 7.57                | 0.0059 | 0.0046  | hNH endonuclease family protein                                 |
| Cluster_331430 | 44                            | 13                           | 0                                        | 4  | 100       | 76               | LI+NSI   | 7.57                | 0.0059 | 0.0046  | conserved hypothetical protein                                  |
| Cluster_11588  | 5                             | 8                            | 39                                       | 9  | 11        | 47               | AI       | 7.31                | 0.0069 | 0.0046  | conserved hypothetical protein                                  |
| Cluster_225286 | 5                             | 8                            | 39                                       | 9  | 11        | 47               | AI       | 7.31                | 0.0069 | 0.0046  | RHS Repeat family protein                                       |
| Cluster_326026 | 5                             | 8                            | 39                                       | 9  | 11        | 47               | AI       | 7.31                | 0.0069 | 0.0046  | fimbrial family protein                                         |
| Cluster_79228  | 1                             | 5                            | 43                                       | 12 | 2         | 29               | AI       | 7.35                | 0.0067 | 0.0051  | conserved hypothetical protein                                  |
| Cluster_151023 | 10                            | 11                           | 34                                       | 6  | 23        | 65               | AI       | 7.80                | 0.0052 | 0.0055  | conserved hypothetical protein                                  |
| Cluster_271719 | 10                            | 11                           | 34                                       | 6  | 23        | 65               | AI       | 7.80                | 0.0052 | 0.0055  | conserved hypothetical protein                                  |
| Cluster_153719 | 9                             | 10                           | 35                                       | 7  | 20        | 59               | AI       | 6.72                | 0.0095 | 0.0059  | glycosyl transferase 8 family protein                           |
| Cluster_188375 | 35                            | 7                            | 9                                        | 10 | 80        | 41               | LI+NSI   | 6.72                | 0.0095 | 0.0059  | phage major capsid E family protein                             |
| Cluster_147543 | 14                            | 0                            | 30                                       | 17 | 32        | 0                | LI+NSI   | 5.34                | 0.0209 | 0.0064  | putative yfjA                                                   |
| Cluster_178542 | 14                            | 0                            | 30                                       | 17 | 32        | 0                | LI+NSI   | 5.34                | 0.0209 | 0.0064  | type III secretion apparatus protein SpaR/YscT/HrcT             |
| Cluster_237554 | 14                            | 0                            | 30                                       | 17 | 32        | 0                | LI+NSI   | 5.34                | 0.0209 | 0.0064  | conserved hypothetical protein                                  |
| Cluster_7621   | 14                            | 0                            | 30                                       | 17 | 32        | 0                | LI+NSI   | 5.34                | 0.0209 | 0.0064  | putative type III secretion EprI protein                        |
| Cluster_12200  | 11                            | 11                           | 33                                       | 6  | 25        | 65               | AI       | 6.75                | 0.0094 | 0.0067  | glycosyltransferase Family 4 family protein                     |
| Cluster_18923  | 11                            | 11                           | 33                                       | 6  | 25        | 65               | AI       | 6.75                | 0.0094 | 0.0067  | glycosyltransferase Family 4 family protein                     |
| Cluster_128567 | 40                            | 10                           | 4                                        | 7  | 91        | 59               | LI+NSI   | 6.51                | 0.0107 | 0.0071  | phage portal protein, lambda family                             |
| Cluster_302107 | 22                            | 2                            | 22                                       | 15 | 50        | 12               | LI+NSI   | 6.00                | 0.0143 | 0.0080  | conserved hypothetical protein                                  |
| Cluster_99362  | 22                            | 2                            | 22                                       | 15 | 50        | 12               | LI+NSI   | 6.00                | 0.0143 | 0.0080  | resolvase, N terminal domain protein                            |
| Cluster_127340 | 28                            | 4                            | 16                                       | 13 | 64        | 24               | LI+NSI   | 6.38                | 0.0115 | 0.0090  | DDE_Tnp_1-associated family protein                             |
| Cluster_342998 | 28                            | 4                            | 16                                       | 13 | 64        | 24               | LI+NSI   | 6.38                | 0.0115 | 0.0090  | phage tail protein I                                            |
| Cluster_322922 | 25                            | 3                            | 19                                       | 14 | 57        | 18               | LI+NSI   | 6.08                | 0.0137 | 0.0091  | lysis S family protein                                          |
| Cluster_157040 | 32                            | 6                            | 12                                       | 11 | 73        | 35               | LI+NSI   | 5.81                | 0.0159 | 0.0094  | methyltransferase domain protein                                |
| Cluster_108599 | 41                            | 11                           | 3                                        | 6  | 93        | 65               | LI+NSI   | 5.80                | 0.0160 | 0.0106  | tail attachment protein                                         |
| Cluster_151647 | 41                            | 11                           | 3                                        | 6  | 93        | 65               | LI+NSI   | 5.80                | 0.0160 | 0.0106  | phage major capsid E family protein                             |
| Cluster_237572 | 41                            | 11                           | 3                                        | 6  | 93        | 65               | LI+NSI   | 5.80                | 0.0160 | 0.0106  | head decoration protein                                         |
| Cluster_253514 | 41                            | 11                           | 3                                        | 6  | 93        | 65               | LI+NSI   | 5.80                | 0.0160 | 0.0106  | colanic acid biosynthesis acetyltransferase WcaF                |
| Cluster_109753 | 17                            | 13                           | 27                                       | 4  | 39        | 76               | AI       | 5.59                | 0.0181 | 0.0106  | outer membrane transport family protein                         |
| Cluster_20103  | 27                            | 4                            | 17                                       | 13 | 61        | 24               | LI+NSI   | 5.59                | 0.0181 | 0.0106  | outer membrane transport family protein                         |
| Cluster_902    | 17                            | 13                           | 27                                       | 4  | 39        | 76               | AI       | 5.59                | 0.0181 | 0.0106  | outer membrane transport family protein                         |
| Cluster_145816 | 8                             | 9                            | 36                                       | 8  | 18        | 53               | AI       | 5.74                | 0.0166 | 0.0109  | putative glyco3, capsid size determination protein Sid          |
| Cluster_111596 | 20                            | 14                           | 24                                       | 3  | 45        | 82               | AI       | 5.35                | 0.0207 | 0.0109  | ethanolamine utilization EutN/carboxysome family protein        |
| Cluster_111600 | 20                            | 14                           | 24                                       | 3  | 45        | 82               | AI       | 5.35                | 0.0207 | 0.0109  | electron transport complex, RnfABCDGE type C subunit            |
| Cluster_131700 | 20                            | 14                           | 24                                       | 3  | 45        | 82               | AI       | 5.35                | 0.0207 | 0.0109  | exodeoxyribonuclease VII, large subunit                         |
| Cluster_196208 | 20                            | 14                           | 24                                       | 3  | 45        | 82               | AI       | 5.35                | 0.0207 | 0.0109  | ethanolamine utilization protein, EutP                          |
| Cluster_196229 | 20                            | 14                           | 24                                       | 3  | 45        | 82               | AI       | 5.35                | 0.0207 | 0.0109  | putative cobalamin biosynthesis protein CbiG                    |
| Cluster_225773 | 20                            | 14                           | 24                                       | 3  | 45        | 82               | AI       | 5.35                | 0.0207 | 0.0109  | propanediol dehydratase medium subunit                          |
| Cluster_225778 | 20                            | 14                           | 24                                       | 3  | 45        | 82               | AI       | 5.35                | 0.0207 | 0.0109  | BMC domain protein                                              |
| Cluster_230774 | 20                            | 14                           | 24                                       | 3  | 45        | 82               | AI       | 5.35                | 0.0207 | 0.0109  | phosphate propanoyltransferase                                  |
| Cluster_259786 | 20                            | 14                           | 24                                       | 3  | 45        | 82               | AI       | 5.35                | 0.0207 | 0.0109  | propanediol dehydratase large subunit                           |
| Cluster_259788 | 20                            | 14                           | 24                                       | 3  | 45        | 82               | AI       | 5.35                | 0.0207 | 0.0109  | propanediol dehydratase small subunit                           |
| Cluster_265851 | 20                            | 14                           | 24                                       | 3  | 45        | 82               | AI       | 5.35                | 0.0207 | 0.0109  | BMC domain protein                                              |
| Cluster_275755 | 20                            | 14                           | 24                                       | 3  | 45        | 82               | AI       | 5.35                | 0.0207 | 0.0109  | propanediol utilization protein PduU                            |
| Cluster_275766 | 20                            | 14                           | 24                                       | 3  | 45        | 82               | AI       | 5.35                | 0.0207 | 0.0109  | dehydratase medium subunit                                      |
| Cluster_291265 | 20                            | 14                           | 24                                       | 3  | 45        | 82               | AI       | 5.35                | 0.0207 | 0.0109  | iron-containing alcohol dehydrogenase family protein            |
| Cluster_291267 | 20                            | 14                           | 24                                       | 3  | 45        | 82               | AI       | 5.35                | 0.0207 | 0.0109  | shell protein                                                   |
| Cluster_307965 | 24                            | 3                            | 20                                       | 14 | 55        | 18               | LI+NSI   | 5.35                | 0.0207 | 0.0109  | traP family protein                                             |
| Cluster_321135 | 20                            | 14                           | 24                                       | 3  | 45        | 82               | AI       | 5.35                | 0.0207 | 0.0109  | helix-turn-helix domain protein                                 |
| Cluster_321136 | 20                            | 14                           | 24                                       | 3  | 45        | 82               | AI       | 5.35                | 0.0207 | 0.0109  | MIP channel family protein                                      |
| Cluster_325632 | 20                            | 14                           | 24                                       | 3  | 45        | 82               | AI       | 5.35                | 0.0207 | 0.0109  | propanediol utilization protein PduA                            |
| Cluster_42758  | 20                            | 14                           | 24                                       | 3  | 45        | 82               | AI       | 5.35                | 0.0207 | 0.0109  | cob(I)alamin adenosyltransferase                                |
| Cluster_42763  | 20                            | 14                           | 24                                       | 3  | 45        | 82               | AI       | 5.35                | 0.0207 | 0.0109  | propanediol utilization protein PduA                            |
| Cluster_218232 | 13                            | 0                            | 31                                       | 17 | 30        | 0                | LI+NSI   | 4.74                | 0.0294 | 0.0125  | conserved hypothetical protein                                  |
| Cluster_234325 | 17                            | 1                            | 27                                       | 16 | 39        | 6                | LI+NSI   | 4.85                | 0.0277 | 0.0127  | bacterial extracellular solute-binding, 5 Middle family protein |
| Cluster_137907 | 10                            | 10                           | 34                                       | 7  | 23        | 59               | AI       | 5.70                | 0.0169 | 0.0135  | hypothetical protein                                            |
| Cluster_148358 | 6                             | 8                            | 38                                       | 9  | 14        | 47               | AI       | 5.97                | 0.0145 | 0.0140  | putative exported protein                                       |
| Cluster_142846 | 12                            | 0                            | 32                                       | 17 | 27        | 0                | LI+NSI   | 4.17                | 0.0410 | 0.0142  | conserved hypothetical protein                                  |
| Cluster_182662 | 12                            | 0                            | 32                                       | 17 | 27        | 0                | LI+NSI   | 4.17                | 0.0410 | 0.0142  | putative membrane protein                                       |
| Cluster_23022  | 12                            | 0                            | 32                                       | 17 | 27        | 0                | LI+NSI   | 4.17                | 0.0410 | 0.0142  | conserved hypothetical protein                                  |
| Cluster_95290  | 12                            | 0                            | 32                                       | 17 | 27        | 0                | LI+NSI   | 4.17                | 0.0410 | 0.0142  | invH outer membrane lipofamily protein                          |
| Cluster_117516 | 42                            | 12                           | 2                                        | 5  | 95        | 71               | LI+NSI   | 5.22                | 0.0224 | 0.0147  | lysR substrate binding domain protein                           |
| Cluster_94313  | 2                             | 5                            | 42                                       | 12 | 5         | 29               | AI       | 5.22                | 0.0224 | 0.0147  | conserved hypothetical protein                                  |
| Cluster_221767 | 21                            | 2                            | 23                                       | 15 | 48        | 12               | LI+NSI   | 5.31                | 0.0212 | 0.0167  | putative nleA1 protein                                          |
| Cluster_233786 | 21                            | 2                            | 23                                       | 15 | 48        | 12               | LI+NSI   | 5.31                | 0.0212 | 0.0167  | intimin                                                         |
| Cluster_74390  | 21                            | 2                            | 23                                       | 15 | 48        | 12               | LI+NSI   | 5.31                | 0.0212 | 0.0167  | hypothetical protein                                            |
| Cluster_178488 | 20                            | 2                            | 24                                       | 15 | 45        | 12               | LI+NSI   | 4.66                | 0.0308 | 0.0175  | putative nleE                                                   |
| Cluster_262069 | 20                            | 2                            | 24                                       | 15 | 45        | 12               | LI+NSI   | 4.66                | 0.0308 | 0.0175  | istB-like ATP binding family protein                            |
| Cluster_289981 | 20                            | 2                            | 24                                       | 15 | 45        | 12               | LI+NSI   | 4.66                | 0.0308 | 0.0175  | integrase core domain protein                                   |
| Cluster_313775 | 33                            | 7                            | 11                                       | 10 | 75        | 41               | LI+NSI   | 4.81                | 0.0284 | 0.0178  | outer membrane autotransporter barrel domain protein            |
| Cluster_103685 | 43                            | 13                           | 1                                        | 4  | 98        | 76               | LI+NSI   | 4.81                | 0.0283 | 0.0186  | hypothetical protein                                            |
| Cluster_212386 | 43                            | 13                           | 1                                        | 4  | 98        | 76               | LI+NSI   | 4.81                | 0.0283 | 0.0186  | sigma-54 interaction domain protein                             |
| Cluster_23668  | 43                            | 13                           | 1                                        |    |           |                  |          |                     |        |         |                                                                 |

|                |    |    |    |    |     |    |        |        |        |                                           |                                                                                    |
|----------------|----|----|----|----|-----|----|--------|--------|--------|-------------------------------------------|------------------------------------------------------------------------------------|
| Cluster_171552 | 0  | 3  | 44 | 14 | 0   | 18 | AI     | 4.83   | 0.0280 | 0.0189                                    | binding-protein-dependent transport system inner membrane component family protein |
| Cluster_171555 | 0  | 3  | 44 | 14 | 0   | 18 | AI     | 4.83   | 0.0280 | 0.0189                                    | glycerophosphoryl diester phosphodiesterase family protein                         |
| Cluster_171556 | 0  | 3  | 44 | 14 | 0   | 18 | AI     | 4.83   | 0.0280 | 0.0189                                    | ROK family protein                                                                 |
| Cluster_171708 | 0  | 3  | 44 | 14 | 0   | 18 | AI     | 4.83   | 0.0280 | 0.0189                                    | conserved hypothetical protein                                                     |
| Cluster_193190 | 44 | 14 | 0  | 3  | 100 | 82 | LI+NSI | 4.83   | 0.0280 | 0.0189                                    | nlpC/P60 family protein                                                            |
| Cluster_206060 | 0  | 3  | 44 | 14 | 0   | 18 | AI     | 4.83   | 0.0280 | 0.0189                                    | ABC transporter family protein                                                     |
| Cluster_206339 | 0  | 3  | 44 | 14 | 0   | 18 | AI     | 4.83   | 0.0280 | 0.0189                                    | putative predicted protein                                                         |
| Cluster_207740 | 0  | 3  | 44 | 14 | 0   | 18 | AI     | 4.83   | 0.0280 | 0.0189                                    | caudovirales tail fibre assembly family protein                                    |
| Cluster_23603  | 44 | 14 | 0  | 3  | 100 | 82 | LI+NSI | 4.83   | 0.0280 | 0.0189                                    | putative acyltransferase YihG                                                      |
| Cluster_245044 | 44 | 14 | 0  | 3  | 100 | 82 | LI+NSI | 4.83   | 0.0280 | 0.0189                                    | inner membrane transport protein YdiN                                              |
| Cluster_321371 | 0  | 3  | 44 | 14 | 0   | 18 | AI     | 4.83   | 0.0280 | 0.0189                                    | binding-protein-dependent transport system inner membrane component family protein |
| Cluster_90557  | 44 | 14 | 0  | 3  | 100 | 82 | LI+NSI | 4.83   | 0.0280 | 0.0189                                    | conserved hypothetical protein                                                     |
| Cluster_94403  | 0  | 3  | 44 | 14 | 0   | 18 | AI     | 4.83   | 0.0280 | 0.0189                                    | conserved hypothetical protein                                                     |
| Cluster_225861 | 7  | 8  | 37 | 9  | 16  | 47 | AI     | 4.85   | 0.0277 | 0.0192                                    | polarity suppression protein                                                       |
| Cluster_227577 | 7  | 8  | 37 | 9  | 16  | 47 | AI     | 4.85   | 0.0277 | 0.0192                                    | single-stranded DNA-binding protein                                                |
| Cluster_232396 | 7  | 8  | 37 | 9  | 16  | 47 | AI     | 4.85   | 0.0277 | 0.0192                                    | putative dNA-binding helix-turn-helix protein                                      |
| Cluster_31977  | 7  | 8  | 37 | 9  | 16  | 47 | AI     | 4.85   | 0.0277 | 0.0192                                    | lipopolysaccharide 1,2-glucosyltransferase                                         |
| Cluster_4778   | 7  | 8  | 37 | 9  | 16  | 47 | AI     | 4.85   | 0.0277 | 0.0192                                    | conserved hypothetical protein                                                     |
| Cluster_207867 | 15 | 12 | 29 | 5  | 34  | 71 | AI     | 5.22   | 0.0223 | 0.0199                                    | putative invasins                                                                  |
| Cluster_308000 | 15 | 12 | 29 | 5  | 34  | 71 | AI     | 5.22   | 0.0223 | 0.0199                                    | type-F conjugative transfer system mating-pair stabilization protein TraN          |
| Cluster_4832   | 29 | 5  | 15 | 12 | 66  | 29 | LI+NSI | 5.22   | 0.0223 | 0.0199                                    | DNA methylase family protein                                                       |
| Cluster_68753  | 29 | 5  | 15 | 12 | 66  | 29 | LI+NSI | 5.22   | 0.0223 | 0.0199                                    | conserved hypothetical protein                                                     |
| Cluster_297448 | 21 | 14 | 23 | 3  | 48  | 82 | AI     | 4.68   | 0.0305 | 0.0204                                    | conserved hypothetical protein                                                     |
| Cluster_14998  | 26 | 4  | 18 | 13 | 59  | 24 | LI+NSI | 4.86   | 0.0274 | 0.0212                                    | bacteriophage replication gene A family protein                                    |
| Cluster_222333 | 26 | 4  | 18 | 13 | 59  | 24 | LI+NSI | 4.86   | 0.0274 | 0.0212                                    | phage major capsid protein, HK97 family                                            |
| Cluster_252976 | 26 | 4  | 18 | 13 | 59  | 24 | LI+NSI | 4.86   | 0.0274 | 0.0212                                    | phage prohead protease, HK97 family                                                |
| Cluster_59004  | 26 | 4  | 18 | 13 | 59  | 24 | LI+NSI | 4.86   | 0.0274 | 0.0212                                    | phage prohead protease, HK97 family                                                |
| Cluster_80973  | 26 | 4  | 18 | 13 | 59  | 24 | LI+NSI | 4.86   | 0.0274 | 0.0212                                    | phage integrase family protein                                                     |
| Cluster_133289 | 40 | 11 | 4  | 6  | 91  | 65 | LI+NSI | 4.38   | 0.0364 | 0.0218                                    | bacterial Ig-like domain family protein                                            |
| Cluster_167315 | 40 | 11 | 4  | 6  | 91  | 65 | LI+NSI | 4.38   | 0.0364 | 0.0218                                    | conserved hypothetical protein                                                     |
| Cluster_271588 | 4  | 6  | 40 | 11 | 9   | 35 | AI     | 4.38   | 0.0364 | 0.0218                                    | prophage CP4-57 integrase                                                          |
| Cluster_302715 | 40 | 11 | 4  | 6  | 91  | 65 | LI+NSI | 4.38   | 0.0364 | 0.0218                                    | conserved hypothetical protein                                                     |
| Cluster_40177  | 40 | 11 | 4  | 6  | 91  | 65 | LI+NSI | 4.38   | 0.0364 | 0.0218                                    | major tail V domain protein                                                        |
| Cluster_56967  | 40 | 11 | 4  | 6  | 91  | 65 | LI+NSI | 4.38   | 0.0364 | 0.0218                                    | RNA 2'-phosphotransferase, Tpt1 / Kpta family protein                              |
| Cluster_78687  | 40 | 11 | 4  | 6  | 91  | 65 | LI+NSI | 4.38   | 0.0364 | 0.0218                                    | minor tail protein U                                                               |
| Cluster_258248 | 16 | 12 | 28 | 5  | 36  | 71 | AI     | 4.49   | 0.0341 | 0.0225                                    | conserved hypothetical protein                                                     |
| Cluster_128422 | 30 | 6  | 14 | 11 | 68  | 35 | LI+NSI | 4.21   | 0.0402 | 0.0239                                    | dynamins family protein                                                            |
| Cluster_14627  | 14 | 11 | 30 | 6  | 32  | 65 | AI     | 4.21   | 0.0402 | 0.0239                                    | cysteine protease , YopT-type domain protein                                       |
| Cluster_272941 | 30 | 6  | 14 | 11 | 68  | 35 | LI+NSI | 4.21   | 0.0402 | 0.0239                                    | phage tail E family protein                                                        |
| Cluster_284077 | 30 | 6  | 14 | 11 | 68  | 35 | LI+NSI | 4.21   | 0.0402 | 0.0239                                    | ferric enterobactin (Enterochelin) transport                                       |
| Cluster_74420  | 30 | 6  | 14 | 11 | 68  | 35 | LI+NSI | 4.21   | 0.0402 | 0.0239                                    | conserved hypothetical protein                                                     |
| Cluster_178543 | 16 | 1  | 28 | 16 | 36  | 6  | LI+NSI | 4.25   | 0.0392 | 0.0241                                    | type III secretion , HrpO family protein                                           |
| Cluster_18601  | 28 | 16 | 1  | 64 | 94  | AI | 4.25   | 0.0392 | 0.0241 | ribbons-helix-helix , copG family protein |                                                                                    |
| Cluster_222895 | 16 | 1  | 28 | 16 | 36  | 6  | LI+NSI | 4.25   | 0.0392 | 0.0241                                    | conserved hypothetical protein                                                     |
| Cluster_39298  | 28 | 16 | 1  | 64 | 94  | AI | 4.25   | 0.0392 | 0.0241 | endodeoxyribonuclease RusA family protein |                                                                                    |
| Cluster_82167  | 16 | 1  | 28 | 16 | 36  | 6  | LI+NSI | 4.25   | 0.0392 | 0.0241                                    | conserved hypothetical protein                                                     |
| Cluster_242712 | 25 | 4  | 19 | 13 | 57  | 24 | LI+NSI | 4.20   | 0.0405 | 0.0244                                    | DDE_Tnp_1-associated family protein                                                |
| Cluster_285341 | 25 | 4  | 19 | 13 | 57  | 24 | LI+NSI | 4.20   | 0.0405 | 0.0244                                    | H+ symporter family protein                                                        |
| Cluster_342345 | 25 | 4  | 19 | 13 | 57  | 24 | LI+NSI | 4.20   | 0.0405 | 0.0244                                    | conserved hypothetical protein                                                     |
| Cluster_99113  | 25 | 4  | 19 | 13 | 57  | 24 | LI+NSI | 4.20   | 0.0405 | 0.0244                                    | putative membrane protein                                                          |
| Cluster_283175 | 11 | 0  | 33 | 17 | 25  | 0  | LI+NSI | 3.63   | 0.0567 | 0.0255                                    | bacterial regulator, luxR family protein                                           |
| Cluster_313761 | 11 | 0  | 33 | 17 | 25  | 0  | LI+NSI | 3.63   | 0.0567 | 0.0255                                    | HNH endonuclease family protein                                                    |
| Cluster_314206 | 11 | 0  | 33 | 17 | 25  | 0  | LI+NSI | 3.63   | 0.0567 | 0.0255                                    | type III secretion apparatus protein PrgH/EprH                                     |
| Cluster_4740   | 11 | 0  | 33 | 17 | 25  | 0  | LI+NSI | 3.63   | 0.0567 | 0.0255                                    | marR family protein                                                                |
| Cluster_59760  | 11 | 0  | 33 | 17 | 25  | 0  | LI+NSI | 3.63   | 0.0567 | 0.0255                                    | putative variable tail fiber protein                                               |
| Cluster_153716 | 9  | 9  | 35 | 8  | 20  | 53 | AI     | 4.76   | 0.0292 | 0.0258                                    | conserved hypothetical protein                                                     |
| Cluster_203385 | 9  | 9  | 35 | 8  | 20  | 53 | AI     | 4.76   | 0.0292 | 0.0258                                    | conserved hypothetical family protein                                              |
| Cluster_147907 | 5  | 7  | 39 | 10 | 11  | 41 | AI     | 5.14   | 0.0234 | 0.0263                                    | HNH endonuclease family protein                                                    |
| Cluster_294187 | 39 | 10 | 5  | 7  | 89  | 59 | LI+NSI | 5.14   | 0.0234 | 0.0263                                    | conserved hypothetical protein                                                     |
| Cluster_173912 | 15 | 1  | 29 | 16 | 34  | 6  | LI+NSI | 3.69   | 0.0547 | 0.0267                                    | espZ family protein                                                                |
| Cluster_180437 | 15 | 1  | 29 | 16 | 34  | 6  | LI+NSI | 3.69   | 0.0547 | 0.0267                                    | putative transposase                                                               |
| Cluster_183305 | 15 | 1  | 29 | 16 | 34  | 6  | LI+NSI | 3.69   | 0.0547 | 0.0267                                    | putative type III secretion protein EprJ                                           |
| Cluster_197488 | 15 | 1  | 29 | 16 | 34  | 6  | LI+NSI | 3.69   | 0.0547 | 0.0267                                    | putative dNA-binding transcriptional regulator                                     |
| Cluster_209025 | 15 | 1  | 29 | 16 | 34  | 6  | LI+NSI | 3.69   | 0.0547 | 0.0267                                    | putative epaO1 protein                                                             |
| Cluster_209146 | 15 | 1  | 29 | 16 | 34  | 6  | LI+NSI | 3.69   | 0.0547 | 0.0267                                    | shET2 enterotoxin, N-terminal region family protein                                |
| Cluster_211131 | 15 | 1  | 29 | 16 | 34  | 6  | LI+NSI | 3.69   | 0.0547 | 0.0267                                    | insA N-terminal domain protein                                                     |
| Cluster_221708 | 15 | 1  | 29 | 16 | 34  | 6  | LI+NSI | 3.69   | 0.0547 | 0.0267                                    | conserved hypothetical protein                                                     |
| Cluster_246778 | 15 | 1  | 29 | 16 | 34  | 6  | LI+NSI | 3.69   | 0.0547 | 0.0267                                    | conserved hypothetical protein                                                     |
| Cluster_289072 | 15 | 1  | 29 | 16 | 34  | 6  | LI+NSI | 3.69   | 0.0547 | 0.0267                                    | transposase DDE domain protein                                                     |
| Cluster_317010 | 15 | 1  | 29 | 16 | 34  | 6  | LI+NSI | 3.69   | 0.0547 | 0.0267                                    | conserved hypothetical protein                                                     |
| Cluster_348887 | 15 | 1  | 29 | 16 | 34  | 6  | LI+NSI | 3.69   | 0.0547 | 0.0267                                    | hypothetical protein                                                               |
| Cluster_72088  | 15 | 1  | 29 | 16 | 34  | 6  | LI+NSI | 3.69   | 0.0547 | 0.0267                                    | glycosyl transferases group 1 family protein                                       |
| Cluster_72092  | 15 | 1  | 29 | 16 | 34  | 6  | LI+NSI | 3.69   | 0.0547 | 0.0267                                    | transposase DDE domain protein                                                     |
| Cluster_179213 | 41 | 12 | 3  | 5  | 93  | 71 | LI+NSI | 3.69   | 0.0548 | 0.0321                                    | conserved hypothetical protein                                                     |
| Cluster_78756  | 3  | 5  | 41 | 12 | 7   | 29 | AI     | 3.69   | 0.0548 | 0.0321                                    | prophage CP4-57 regulatory family protein                                          |
| Cluster_167317 | 34 | 8  | 10 | 9  | 77  | 47 | LI+NSI | 3.91   | 0.0481 | 0.0321                                    | intergenic-region protein                                                          |
| Cluster_346478 | 34 | 8  | 10 | 9  | 77  | 47 | LI+NSI | 3.91   | 0.0481 | 0.0321                                    | conserved hypothetical protein                                                     |
| Cluster_226889 | 6  | 7  | 38 | 10 | 14  | 41 | AI     | 4.03   | 0.0448 | 0.0334                                    | putative P4-specific DNA primase                                                   |
| Cluster_108011 | 19 | 2  | 25 | 15 | 43  | 12 | LI+NSI | 4.06   | 0.0439 | 0.0335                                    | type-F conjugative transfer system mating-pair stabilization protein TraN          |
| Cluster_178309 | 19 | 2  | 25 | 15 | 43  | 12 | LI+NSI | 4.06   | 0.0439 | 0.0335                                    | conserved hypothetical protein                                                     |
| Cluster_232988 | 19 | 2  | 25 | 15 | 43  | 12 | LI+NSI | 4.06   | 0.0439 | 0.0335                                    | putative molybdate metabolism regulator                                            |
| Cluster_234872 | 19 | 2  | 25 | 15 | 43  | 12 | LI+NSI | 4.06   | 0.0439 | 0.0335                                    | lysR substrate binding domain protein                                              |
| Cluster_72094  | 19 | 2  | 25 | 15 | 43  | 12 | LI+NSI | 4.06   | 0.0439 | 0.0335                                    | phage integrase family protein                                                     |
| Cluster_132559 | 26 | 15 | 18 | 2  | 59  | 88 | AI     | 3.50   | 0.0615 | 0.0359                                    | phoH-like family protein                                                           |
| Cluster_14894  | 18 | 2  | 26 | 15 | 41  | 12 | LI+NSI | 3.50   | 0.0615 | 0.0359                                    | conserved hypothetical protein                                                     |
| Cluster_175201 | 18 | 2  | 26 | 15 | 41  | 12 | LI+NSI | 3.50   | 0.0615 | 0.0359                                    | fimbrial family protein                                                            |
| Cluster_175778 | 18 | 2  | 26 | 15 | 41  | 12 | LI+NSI | 3.50   | 0.0615 | 0.0359                                    | homeo-like domain protein                                                          |
| Cluster_221391 | 18 | 2  | 26 | 15 | 41  | 12 | LI+NSI | 3.50   | 0.0615 | 0.0359                                    | conserved hypothetical protein                                                     |
| Cluster_300651 | 18 | 2  | 26 | 15 | 41  | 12 | LI+NSI | 3.50   | 0.0615 | 0.0359                                    | conserved hypothetical protein                                                     |
| Cluster_322858 | 26 | 15 | 18 | 2  | 59  | 88 | AI     | 3.50   | 0.0615 | 0.0359                                    | conserved hypothetical protein                                                     |
| Cluster_180288 | 32 | 7  | 12 | 10 | 73  | 41 | LI+NSI | 4.01   | 0.0451 | 0.0360                                    | exodeoxyribonuclease VII, large subunit                                            |
| Cluster_264826 | 32 | 7  | 12 | 10 | 73  | 41 | LI+NSI | 4.01   | 0.0451 | 0.0360                                    | yagB/YeeU/YjZ family protein                                                       |
| Cluster_327168 | 32 | 7  | 12 | 10 | 73  | 41 | LI+NSI | 4.01   | 0.0451 | 0.0360                                    | helix-turn-helix domain protein                                                    |
| Cluster_88571  | 32 | 7  | 12 | 10 | 73  | 41 | LI+NSI | 4.01   | 0.0451 | 0.0360                                    | regulatory protein cro                                                             |
| Cluster_54451  | 12 | 10 | 32 | 7  | 27  | 59 | AI     | 4.01   | 0.0451 | 0.0360                                    | conserved hypothetical protein                                                     |
| Cluster_9782   | 12 | 10 | 32 | 7  | 27  | 59 | AI     | 4.01   | 0.0451 | 0.0360                                    | putative cytoplasmic protein                                                       |
| Cluster_182223 | 22 | 3  | 22 | 14 | 50  | 18 | LI+NSI | 4.05   | 0.0441 | 0.0402                                    | putative outer membrane fimbrial usher protein                                     |
| Cluster_141364 | 21 | 3  | 23 | 14 | 48  | 18 | LI+NSI | 3.47   | 0.0623 | 0.0418                                    | outer membrane porin protein OmpD                                                  |
| Cluster_20553  | 21 | 3  | 23 | 14 | 48  | 18 | LI+NSI | 3.47   | 0.0623 | 0.0418                                    | conserved hypothetical protein                                                     |
| Cluster_26108  | 21 | 3  | 23 | 14 | 48  | 18 | LI+NSI | 3.47   | 0.0623 | 0.0418                                    | outer membrane porin protein Omp                                                   |



|                |    |    |    |    |    |     |        |      |        |        |             |                                                                  |
|----------------|----|----|----|----|----|-----|--------|------|--------|--------|-------------|------------------------------------------------------------------|
| Cluster_104881 | 20 | 13 | 24 | 4  | 45 | 76  | AI     | 3.58 | 0.0584 | 0.0444 |             | putative toxin higB-2                                            |
| Cluster_137958 | 20 | 13 | 24 | 4  | 45 | 76  | AI     | 3.58 | 0.0584 | 0.0444 | <i>symE</i> | toxic protein SymE                                               |
| Cluster_196216 | 20 | 13 | 24 | 4  | 45 | 76  | AI     | 3.58 | 0.0584 | 0.0444 |             | putative propanediol utilization protein                         |
| Cluster_283607 | 24 | 4  | 20 | 13 | 55 | 24  | LI+NSI | 3.58 | 0.0584 | 0.0444 |             | methyltransferase domain protein                                 |
| Cluster_325619 | 20 | 13 | 24 | 4  | 45 | 76  | AI     | 3.58 | 0.0584 | 0.0444 |             | aldehyde dehydrogenase family protein                            |
| Cluster_337809 | 24 | 4  | 20 | 13 | 55 | 24  | LI+NSI | 3.58 | 0.0584 | 0.0444 |             | putative antigen 43 domain protein                               |
| Cluster_40501  | 20 | 13 | 24 | 4  | 45 | 76  | AI     | 3.58 | 0.0584 | 0.0444 |             | helix-turn-helix domain protein                                  |
| Cluster_43613  | 24 | 4  | 20 | 13 | 55 | 24  | LI+NSI | 3.58 | 0.0584 | 0.0444 |             | phage gp6-like head-tail connector family protein                |
| Cluster_82579  | 20 | 13 | 24 | 4  | 45 | 76  | AI     | 3.58 | 0.0584 | 0.0444 | <i>espJ</i> | putative non-LEE-encoded effector EspJ                           |
| Cluster_84211  | 24 | 4  | 20 | 13 | 55 | 24  | LI+NSI | 3.58 | 0.0584 | 0.0444 |             | conserved hypothetical protein                                   |
| Cluster_324271 | 2  | 4  | 42 | 13 | 5  | 24  | AI     | 3.07 | 0.0796 | 0.0457 | <i>ssbF</i> | plasmid-derived single-stranded DNA-binding protein              |
| Cluster_8918   | 2  | 4  | 42 | 13 | 5  | 24  | AI     | 3.07 | 0.0796 | 0.0457 | <i>ssbF</i> | plasmid-derived single-stranded DNA-binding protein              |
| Cluster_218915 | 42 | 13 | 2  | 4  | 95 | 76  | LI+NSI | 3.07 | 0.0796 | 0.0457 |             | parB-like nuclease domain protein                                |
| Cluster_118990 | 14 | 1  | 30 | 16 | 32 | 6   | LI+NSI | 3.16 | 0.0755 | 0.0469 |             | conserved hypothetical protein                                   |
| Cluster_128383 | 14 | 1  | 30 | 16 | 32 | 6   | LI+NSI | 3.16 | 0.0755 | 0.0469 |             | conserved hypothetical protein                                   |
| Cluster_14537  | 14 | 1  | 30 | 16 | 32 | 6   | LI+NSI | 3.16 | 0.0755 | 0.0469 |             | viral (Super1) RNA helicase family protein                       |
| Cluster_183369 | 14 | 1  | 30 | 16 | 32 | 6   | LI+NSI | 3.16 | 0.0755 | 0.0469 |             | conserved hypothetical protein                                   |
| Cluster_197463 | 30 | 16 | 14 | 1  | 68 | 94  | AI     | 3.16 | 0.0755 | 0.0469 | <i>hipA</i> | serine/threonine-protein kinase HipA                             |
| Cluster_261666 | 14 | 1  | 30 | 16 | 32 | 6   | LI+NSI | 3.16 | 0.0755 | 0.0469 |             | AAA domain protein                                               |
| Cluster_271379 | 30 | 16 | 14 | 1  | 68 | 94  | AI     | 3.16 | 0.0755 | 0.0469 |             | glycosyl hydrolase family 65, N-terminal domain protein          |
| Cluster_276697 | 14 | 1  | 30 | 16 | 32 | 6   | LI+NSI | 3.16 | 0.0755 | 0.0469 |             | conserved hypothetical protein                                   |
| Cluster_291791 | 14 | 1  | 30 | 16 | 32 | 6   | LI+NSI | 3.16 | 0.0755 | 0.0469 |             | plasmid conjugative transfer entry exclusion TraS family protein |
| Cluster_292258 | 14 | 1  | 30 | 16 | 32 | 6   | LI+NSI | 3.16 | 0.0755 | 0.0469 |             | conserved hypothetical protein                                   |
| Cluster_59324  | 14 | 1  | 30 | 16 | 32 | 6   | LI+NSI | 3.16 | 0.0755 | 0.0469 |             | putative acetyltransferase                                       |
| Cluster_73497  | 14 | 1  | 30 | 16 | 32 | 6   | LI+NSI | 3.16 | 0.0755 | 0.0469 |             | conserved hypothetical protein                                   |
| Cluster_171049 | 7  | 7  | 37 | 10 | 16 | 41  | AI     | 3.11 | 0.0776 | 0.0471 | <i>rfbA</i> | glucose-1-phosphate thymidyltransferase                          |
| Cluster_281011 | 7  | 7  | 37 | 10 | 16 | 41  | AI     | 3.11 | 0.0776 | 0.0471 |             | conserved hypothetical protein                                   |
| Cluster_147263 | 36 | 9  | 8  | 8  | 82 | 53  | LI+NSI | 3.90 | 0.0484 | 0.0479 |             | methyltransferase domain protein                                 |
| Cluster_267179 | 36 | 9  | 8  | 8  | 82 | 53  | LI+NSI | 3.90 | 0.0484 | 0.0479 |             | conserved hypothetical protein                                   |
| Cluster_319379 | 8  | 8  | 36 | 9  | 18 | 47  | AI     | 3.90 | 0.0484 | 0.0479 | <i>rfbJ</i> | lipopolysaccharide 1,2-glycosyltransferase                       |
| Cluster_321570 | 8  | 8  | 36 | 9  | 18 | 47  | AI     | 3.90 | 0.0484 | 0.0479 |             | transposase family protein                                       |
| Cluster_7938   | 36 | 9  | 8  | 8  | 82 | 53  | LI+NSI | 3.90 | 0.0484 | 0.0479 |             | DNA methylase family protein                                     |
| Cluster_103416 | 26 | 5  | 18 | 12 | 59 | 29  | LI+NSI | 3.22 | 0.0729 | 0.0486 |             | conserved hypothetical protein                                   |
| Cluster_153041 | 26 | 5  | 18 | 12 | 59 | 29  | LI+NSI | 3.22 | 0.0729 | 0.0486 |             | conserved hypothetical protein                                   |
| Cluster_208887 | 26 | 5  | 18 | 12 | 59 | 29  | LI+NSI | 3.22 | 0.0729 | 0.0486 |             | putative escherichia coli IMT2125 genomic chromosome, IMT2125    |
| Cluster_248119 | 26 | 5  | 18 | 12 | 59 | 29  | LI+NSI | 3.22 | 0.0729 | 0.0486 |             | dnab-like helicase N terminal domain protein                     |
| Cluster_302692 | 26 | 5  | 18 | 12 | 59 | 29  | LI+NSI | 3.22 | 0.0729 | 0.0486 |             | hypothetical protein                                             |
| Cluster_342342 | 26 | 5  | 18 | 12 | 59 | 29  | LI+NSI | 3.22 | 0.0729 | 0.0486 |             | conserved hypothetical protein                                   |
| Cluster_342343 | 26 | 5  | 18 | 12 | 59 | 29  | LI+NSI | 3.22 | 0.0729 | 0.0486 |             | conserved hypothetical protein                                   |
| Cluster_46843  | 26 | 5  | 18 | 12 | 59 | 29  | LI+NSI | 3.22 | 0.0729 | 0.0486 |             | dnab-like helicase N terminal domain protein                     |
| Cluster_70068  | 26 | 5  | 18 | 12 | 59 | 29  | LI+NSI | 3.22 | 0.0729 | 0.0486 |             | conserved hypothetical protein                                   |
| Cluster_82835  | 26 | 5  | 18 | 12 | 59 | 29  | LI+NSI | 3.22 | 0.0729 | 0.0486 |             | conserved hypothetical protein                                   |
| Cluster_68405  | 18 | 12 | 26 | 5  | 41 | 71  | AI     | 3.22 | 0.0729 | 0.0486 | <i>fimA</i> | type-1 fimbrial protein, A chain                                 |
| Cluster_73146  | 18 | 12 | 26 | 5  | 41 | 71  | AI     | 3.22 | 0.0729 | 0.0486 |             | conserved hypothetical protein                                   |
| Cluster_221116 | 10 | 0  | 34 | 17 | 23 | 0   | LI+NSI | 3.11 | 0.0777 | 0.0493 |             | hypothetical protein                                             |
| Cluster_312941 | 10 | 0  | 34 | 17 | 23 | 0   | LI+NSI | 3.11 | 0.0777 | 0.0493 |             | putative antirepressor protein                                   |
| Cluster_317549 | 10 | 0  | 34 | 17 | 23 | 0   | LI+NSI | 3.11 | 0.0777 | 0.0493 |             | ead/Ea22-like family protein                                     |
| Cluster_317551 | 10 | 0  | 34 | 17 | 23 | 0   | LI+NSI | 3.11 | 0.0777 | 0.0493 |             | conserved hypothetical protein                                   |
| Cluster_44635  | 34 | 17 | 10 | 0  | 77 | 100 | AI     | 3.11 | 0.0777 | 0.0493 |             | type III secretion, HrpO family protein                          |
| Cluster_95057  | 10 | 0  | 34 | 17 | 23 | 0   | LI+NSI | 3.11 | 0.0777 | 0.0493 |             | P22AR C-terminal domain protein                                  |

Lethal (LI) vs. Non-Lethal (NSI+AI)

| Cluster ID     | No. of Genomes |        |                              |           | Percentage of Genomes Containing Cluster |          |           |         | Chi-squared test |         | Fisher's exact test |             | Gene ID                                                                   | Predicted Protein Function |
|----------------|----------------|--------|------------------------------|-----------|------------------------------------------|----------|-----------|---------|------------------|---------|---------------------|-------------|---------------------------------------------------------------------------|----------------------------|
|                | LI             | NSI+AI | Absent (<0.9) <sup>a,b</sup> | Greater % | % LI                                     | % NSI+AI | statistic | p-value | p-value          | p-value |                     |             |                                                                           |                            |
| Cluster_101055 | 20             | 37     | 4                            | 0         | 83                                       | 100      | NSI+AI    | 4.16    | 0.0414           | 0.0204  |                     | <i>prc</i>  | tail-specific protease                                                    |                            |
| Cluster_104965 | 4              | 0      | 20                           | 37        | 17                                       | 0        | LI        | 4.16    | 0.0414           | 0.0204  |                     |             | transposase family protein                                                |                            |
| Cluster_105254 | 20             | 37     | 4                            | 0         | 83                                       | 100      | NSI+AI    | 4.16    | 0.0414           | 0.0204  |                     | <i>aceF</i> | dihydropolyllysine-residue acetyltransferase                              |                            |
| Cluster_108011 | 13             | 8      | 11                           | 29        | 54                                       | 22       | LI        | 5.46    | 0.0194           | 0.0132  |                     | <i>traN</i> | type-F conjugative transfer system mating-pair stabilization protein TraN |                            |
| Cluster_108780 | 18             | 35     | 6                            | 2         | 75                                       | 95       | NSI+AI    | 3.34    | 0.0678           | 0.0481  |                     |             | phage terminase large subunit family protein                              |                            |
| Cluster_11079  | 11             | 29     | 13                           | 8         | 46                                       | 78       | NSI+AI    | 5.46    | 0.0194           | 0.0132  |                     |             | transglycosylase SLT domain protein                                       |                            |
| Cluster_113457 | 14             | 31     | 10                           | 6         | 58                                       | 84       | NSI+AI    | 3.65    | 0.0562           | 0.0383  |                     | <i>fimF</i> | protein FimF                                                              |                            |
| Cluster_113721 | 7              | 22     | 17                           | 15        | 29                                       | 59       | NSI+AI    | 4.21    | 0.0402           | 0.0350  |                     |             | phage tail tape measure protein, lambda family                            |                            |
| Cluster_120557 | 20             | 37     | 4                            | 0         | 83                                       | 100      | NSI+AI    | 4.16    | 0.0414           | 0.0204  |                     | <i>surE</i> | 5/3'-nucleotidase SurE                                                    |                            |
| Cluster_125122 | 7              | 2      | 17                           | 35        | 29                                       | 5        | LI        | 4.78    | 0.0288           | 0.0221  |                     |             | putative predicted protein                                                |                            |
| Cluster_12875  | 20             | 37     | 4                            | 0         | 83                                       | 100      | NSI+AI    | 4.16    | 0.0414           | 0.0204  |                     | <i>narU</i> | nitrite extrusion 2 domain protein                                        |                            |
| Cluster_132559 | 12             | 29     | 12                           | 8         | 50                                       | 78       | NSI+AI    | 4.11    | 0.0426           | 0.0277  |                     |             | phoH-like family protein                                                  |                            |
| Cluster_133256 | 0              | 7      | 24                           | 30        | 0                                        | 19       | NSI+AI    | 3.44    | 0.0638           | 0.0358  |                     |             | conserved hypothetical protein                                            |                            |
| Cluster_135282 | 20             | 37     | 4                            | 0         | 83                                       | 100      | NSI+AI    | 4.16    | 0.0414           | 0.0204  |                     | <i>rplQ</i> | ribosomal protein L17                                                     |                            |
| Cluster_136944 | 17             | 35     | 7                            | 2         | 71                                       | 95       | NSI+AI    | 4.78    | 0.0288           | 0.0221  |                     |             | phage terminase large subunit family protein                              |                            |
| Cluster_137178 | 4              | 18     | 20                           | 19        | 17                                       | 49       | NSI+AI    | 5.15    | 0.0233           | 0.0144  |                     |             | hypothetical protein                                                      |                            |
| Cluster_14417  | 9              | 4      | 15                           | 33        | 38                                       | 11       | LI        | 4.69    | 0.0303           | 0.0231  |                     |             | putative predicted protein                                                |                            |
| Cluster_14423  | 10             | 5      | 14                           | 32        | 42                                       | 14       | LI        | 4.80    | 0.0285           | 0.0170  |                     |             | conserved hypothetical protein                                            |                            |
| Cluster_14627  | 5              | 20     | 19                           | 17        | 21                                       | 54       | NSI+AI    | 5.34    | 0.0208           | 0.0159  |                     |             | cysteine protease, YopT-type domain protein                               |                            |
| Cluster_14998  | 17             | 13     | 7                            | 24        | 71                                       | 35       | LI        | 6.06    | 0.0138           | 0.0090  |                     |             | bacteriophage replication gene A family protein                           |                            |
| Cluster_152085 | 6              | 2      | 18                           | 35        | 25                                       | 5        | LI        | 3.34    | 0.0678           | 0.0481  |                     |             | conserved hypothetical protein                                            |                            |
| Cluster_155747 | 19             | 37     | 5                            | 0         | 79                                       | 100      | NSI+AI    | 5.86    | 0.0155           | 0.0071  |                     | <i>phnH</i> | phosphonate C-P lyase system protein PhnH                                 |                            |
| Cluster_166190 | 7              | 2      | 17                           | 35        | 29                                       | 5        | LI        | 4.78    | 0.0288           | 0.0221  |                     |             | phage integrase family protein                                            |                            |
| Cluster_174674 | 7              | 2      | 17                           | 35        | 29                                       | 5        | LI        | 4.78    | 0.0288           | 0.0221  |                     |             | conserved hypothetical protein                                            |                            |
| Cluster_175055 | 8              | 4      | 16                           | 33        | 33                                       | 11       | LI        | 3.36    | 0.0669           | 0.0474  |                     | <i>trbJ</i> | P-type conjugative transfer protein TrbJ                                  |                            |
| Cluster_175131 | 6              | 2      | 18                           | 35        | 25                                       | 5        | LI        | 3.34    | 0.0678           | 0.0481  |                     |             | bacterial transferase hexapeptide family protein                          |                            |
| Cluster_175605 | 6              | 0      | 18                           | 37        | 25                                       | 0        | LI        | 7.63    | 0.0057           | 0.0024  |                     | <i>rfbA</i> | glucose-1-phosphate thymidyltransferase                                   |                            |
| Cluster_175612 | 6              | 1      | 18                           | 36        | 25                                       | 3        | LI        | 5.10    | 0.0239           | 0.0122  |                     |             | transposase DDE domain protein                                            |                            |
| Cluster_175618 | 6              | 1      | 18                           | 36        | 25                                       | 3        | LI        | 5.10    | 0.0239           | 0.0122  |                     |             | polysaccharide biosynthesis/export family protein                         |                            |
| Cluster_176078 | 6              | 1      | 18                           | 36        | 25                                       | 3        | LI        | 5.10    | 0.0239           | 0.0122  |                     |             | outer membrane autotransporter barrel domain protein                      |                            |
| Cluster_176094 | 6              | 2      | 18                           | 35        | 25                                       | 5        | LI        | 3.34    | 0.0678           | 0.0481  |                     |             | NIF3 family protein                                                       |                            |
| Cluster_176970 | 6              | 2      | 18                           | 35        | 25                                       | 5        | LI        | 3.34    | 0.0678           | 0.0481  |                     |             | conserved hypothetical protein                                            |                            |
| Cluster_177334 | 6              | 1      | 18                           | 36        | 25                                       | 3        | LI        | 5.10    | 0.0239           | 0.0122  |                     |             | conserved hypothetical protein                                            |                            |
| Cluster_177488 | 6              | 2      | 18                           | 35        | 25                                       | 5        | LI        | 3.34    | 0.0678           | 0.0481  |                     | <i>fljC</i> | flagellin                                                                 |                            |
| Cluster_178120 | 6              | 2      | 18                           | 35        | 25                                       | 5        | LI        | 3.34    | 0.0678           | 0.0481  |                     |             | conserved hypothetical protein                                            |                            |
| Cluster_178144 | 6              | 1      | 18                           | 36        | 25                                       | 3        | LI        | 5.10    | 0.0239           | 0.0122  |                     |             | putative dsORF-h1                                                         |                            |
| Cluster_178244 | 6              | 2      | 18                           | 35        | 25                                       | 5        | LI        | 3.34    | 0.0678           | 0.0481  |                     |             | conserved hypothetical protein                                            |                            |
| Cluster_182662 | 8              | 4      | 16                           | 33        | 33                                       | 11       | LI        | 3.36    | 0.0669           | 0.0474  |                     |             | putative membrane protein                                                 |                            |
| Cluster_182949 | 8              | 4      | 16                           | 33        | 33                                       | 11       | LI        | 3.36    | 0.0669           | 0.0474  |                     | <i>repA</i> | regulatory protein RepA                                                   |                            |
| Cluster_183172 | 6              | 1      | 18                           | 36        | 25                                       | 3        | LI        | 5.10    | 0.0239           | 0.0122  |                     |             | DDE domain protein                                                        |                            |
| Cluster_183173 | 6              | 1      | 18                           | 36        | 25                                       | 3        | LI        | 5.10    | 0.0239           | 0.0122  |                     |             | transposase family protein                                                |                            |
| Cluster_       |                |        |                              |           |                                          |          |           |         |                  |         |                     |             |                                                                           |                            |



|                |    |    |    |    |     |     |        |      |        |        |              |                                                                                    |
|----------------|----|----|----|----|-----|-----|--------|------|--------|--------|--------------|------------------------------------------------------------------------------------|
| Cluster_208392 | 8  | 4  | 16 | 33 | 33  | 11  | LI     | 3.36 | 0.0669 | 0.0474 |              | conserved hypothetical protein                                                     |
| Cluster_208660 | 18 | 36 | 6  | 1  | 75  | 97  | NSI+AI | 5.10 | 0.0239 | 0.0122 | <i>dnaX</i>  | DNA polymerase III, subunit gamma and tau                                          |
| Cluster_209349 | 19 | 37 | 5  | 0  | 79  | 100 | NSI+AI | 5.86 | 0.0155 | 0.0071 | <i>tnaA</i>  | tryptophanase                                                                      |
| Cluster_209403 | 19 | 37 | 5  | 0  | 79  | 100 | NSI+AI | 5.86 | 0.0155 | 0.0071 | <i>selB</i>  | selenocysteine-specific translation elongation factor                              |
| Cluster_209404 | 20 | 37 | 4  | 0  | 83  | 100 | NSI+AI | 4.16 | 0.0414 | 0.0204 |              | iron-containing alcohol dehydrogenase family protein                               |
| Cluster_211547 | 19 | 37 | 5  | 0  | 79  | 100 | NSI+AI | 5.86 | 0.0155 | 0.0071 | <i>dnaE</i>  | DNA polymerase III, alpha subunit                                                  |
| Cluster_21586  | 19 | 36 | 5  | 1  | 79  | 97  | NSI+AI | 3.55 | 0.0597 | 0.0307 | <i>citG</i>  | triphosphoribosyl-dephospho-CoA synthase CItG                                      |
| Cluster_21640  | 18 | 37 | 6  | 0  | 75  | 100 | NSI+AI | 7.63 | 0.0057 | 0.0024 | <i>nagE</i>  | PTS system, N-acetylglucosamine-specific IIBC component                            |
| Cluster_21650  | 20 | 37 | 4  | 0  | 83  | 100 | NSI+AI | 4.16 | 0.0414 | 0.0204 | <i>pgm</i>   | phosphoglucomutase, alpha-D-glucose phosphate-specific                             |
| Cluster_217662 | 0  | 7  | 24 | 30 | 0   | 19  | NSI+AI | 3.44 | 0.0638 | 0.0358 |              | conserved hypothetical protein                                                     |
| Cluster_218595 | 8  | 3  | 16 | 34 | 33  | 8   | LI     | 4.68 | 0.0306 | 0.0180 | <i>traJ</i>  | protein TraJ                                                                       |
| Cluster_21870  | 19 | 36 | 5  | 1  | 79  | 97  | NSI+AI | 3.55 | 0.0597 | 0.0307 | <i>ssb</i>   | single-stranded DNA-binding protein                                                |
| Cluster_218768 | 19 | 37 | 5  | 0  | 79  | 100 | NSI+AI | 5.86 | 0.0155 | 0.0071 | <i>dacB</i>  | D-alanyl-D-alanine carboxypeptidase/D-alanyl-D-alanine-endopeptidase               |
| Cluster_220402 | 19 | 36 | 5  | 1  | 79  | 97  | NSI+AI | 3.55 | 0.0597 | 0.0307 | <i>alr</i>   | alanine racemase                                                                   |
| Cluster_220923 | 19 | 37 | 5  | 0  | 79  | 100 | NSI+AI | 5.86 | 0.0155 | 0.0071 | <i>nuoN</i>  | NADH-quinone oxidoreductase subunit N                                              |
| Cluster_22096  | 19 | 37 | 5  | 0  | 79  | 100 | NSI+AI | 5.86 | 0.0155 | 0.0071 |              | AAA-like domain protein                                                            |
| Cluster_221116 | 7  | 3  | 17 | 34 | 29  | 8   | LI     | 3.30 | 0.0693 | 0.0397 |              | hypothetical protein                                                               |
| Cluster_221350 | 19 | 36 | 5  | 1  | 79  | 97  | NSI+AI | 3.55 | 0.0597 | 0.0307 | <i>ftsY</i>  | signal recognition particle-docking protein FtsY                                   |
| Cluster_222331 | 15 | 12 | 9  | 25 | 63  | 32  | LI     | 4.19 | 0.0408 | 0.0342 |              | phage portal protein, HK97 family                                                  |
| Cluster_222333 | 17 | 13 | 7  | 24 | 71  | 35  | LI     | 6.06 | 0.0138 | 0.0090 |              | phage major capsid protein, HK97 family                                            |
| Cluster_222806 | 6  | 1  | 18 | 36 | 25  | 3   | LI     | 5.10 | 0.0239 | 0.0122 |              | polysaccharide biosynthesis/export family protein                                  |
| Cluster_224504 | 20 | 37 | 4  | 0  | 83  | 100 | NSI+AI | 4.16 | 0.0414 | 0.0204 | <i>rodZ</i>  | cytoskeleton protein RodZ                                                          |
| Cluster_236134 | 16 | 13 | 8  | 24 | 67  | 35  | LI     | 4.61 | 0.0318 | 0.0201 | <i>dhfrI</i> | dihydrofolate reductase type 1                                                     |
| Cluster_237298 | 6  | 2  | 18 | 35 | 25  | 5   | LI     | 3.34 | 0.0678 | 0.0481 |              | conserved hypothetical protein                                                     |
| Cluster_23757  | 6  | 2  | 18 | 35 | 25  | 5   | LI     | 3.34 | 0.0678 | 0.0481 |              | binding-protein-dependent transport system inner membrane component family protein |
| Cluster_237589 | 8  | 4  | 16 | 33 | 33  | 11  | LI     | 3.36 | 0.0669 | 0.0474 |              | RHS repeat-associated core domain protein                                          |
| Cluster_237804 | 19 | 37 | 5  | 0  | 79  | 100 | NSI+AI | 5.86 | 0.0155 | 0.0071 |              | nitrate reductase, alpha subunit                                                   |
| Cluster_23840  | 6  | 1  | 18 | 36 | 25  | 3   | LI     | 5.10 | 0.0239 | 0.0122 |              | glycosyl transferase family 2 domain protein                                       |
| Cluster_239025 | 7  | 2  | 17 | 35 | 29  | 5   | LI     | 4.78 | 0.0288 | 0.0221 |              | phage terminase, small subunit, P27 family                                         |
| Cluster_239026 | 7  | 2  | 17 | 35 | 29  | 5   | LI     | 4.78 | 0.0288 | 0.0221 |              | phage Terminase family protein                                                     |
| Cluster_239028 | 15 | 12 | 9  | 25 | 63  | 32  | LI     | 4.19 | 0.0408 | 0.0342 |              | phage portal protein, HK97 family                                                  |
| Cluster_239410 | 6  | 2  | 18 | 35 | 25  | 5   | LI     | 3.34 | 0.0678 | 0.0481 |              | bacteriophage replication gene A family protein                                    |
| Cluster_240829 | 7  | 1  | 17 | 36 | 29  | 3   | LI     | 6.78 | 0.0092 | 0.0046 |              | hypothetical protein                                                               |
| Cluster_24145  | 6  | 2  | 18 | 35 | 25  | 5   | LI     | 3.34 | 0.0678 | 0.0481 |              | conserved hypothetical protein                                                     |
| Cluster_24314  | 5  | 0  | 19 | 37 | 21  | 0   | LI     | 5.86 | 0.0155 | 0.0071 |              | degT/DnrJ/EryC1/StrS aminotransferase family protein                               |
| Cluster_243375 | 6  | 2  | 18 | 35 | 25  | 5   | LI     | 3.34 | 0.0678 | 0.0481 |              | tatD related DNase family protein                                                  |
| Cluster_24348  | 5  | 20 | 19 | 17 | 21  | 54  | NSI+AI | 5.34 | 0.0208 | 0.0159 |              | phage tail tape measure protein, lambda family                                     |
| Cluster_245108 | 18 | 36 | 6  | 1  | 75  | 97  | NSI+AI | 5.10 | 0.0239 | 0.0122 |              | electron transport complex, RnfABCDGE type, B subunit                              |
| Cluster_245260 | 19 | 37 | 5  | 0  | 79  | 100 | NSI+AI | 5.86 | 0.0155 | 0.0071 | <i>cheA</i>  | chemotaxis protein CheA                                                            |
| Cluster_246425 | 6  | 2  | 18 | 35 | 25  | 5   | LI     | 3.34 | 0.0678 | 0.0481 |              | conserved hypothetical protein                                                     |
| Cluster_247403 | 5  | 0  | 19 | 37 | 21  | 0   | LI     | 5.86 | 0.0155 | 0.0071 |              | glycosyl transferase 2 family protein                                              |
| Cluster_247837 | 6  | 1  | 18 | 36 | 25  | 3   | LI     | 5.10 | 0.0239 | 0.0122 |              | putative domain protein                                                            |
| Cluster_252971 | 5  | 1  | 19 | 36 | 21  | 3   | LI     | 3.55 | 0.0597 | 0.0307 |              | HNH endonuclease family protein                                                    |
| Cluster_252976 | 17 | 13 | 7  | 24 | 71  | 35  | LI     | 6.06 | 0.0138 | 0.0090 |              | phage prohead protease, HK97 family                                                |
| Cluster_254547 | 17 | 15 | 7  | 22 | 71  | 41  | LI     | 4.21 | 0.0402 | 0.0350 |              | bacteriophage lysis family protein                                                 |
| Cluster_254674 | 7  | 21 | 17 | 16 | 29  | 57  | NSI+AI | 3.42 | 0.0644 | 0.0403 |              | phage integrase family protein                                                     |
| Cluster_256982 | 8  | 4  | 16 | 33 | 33  | 11  | LI     | 3.36 | 0.0669 | 0.0474 |              | hypothetical protein                                                               |
| Cluster_257914 | 24 | 28 | 0  | 9  | 100 | 76  | LI     | 5.05 | 0.0246 | 0.0088 | <i>cadC</i>  | transcriptional activator CadC                                                     |
| Cluster_258248 | 6  | 22 | 18 | 15 | 25  | 59  | NSI+AI | 5.64 | 0.0175 | 0.0100 |              | conserved hypothetical protein                                                     |
| Cluster_258452 | 19 | 36 | 5  | 1  | 79  | 97  | NSI+AI | 3.55 | 0.0597 | 0.0307 | <i>malP</i>  | maltodextrin phosphorylase                                                         |
| Cluster_259070 | 20 | 37 | 4  | 0  | 83  | 100 | NSI+AI | 4.16 | 0.0414 | 0.0204 | <i>mfh</i>   | transcription-repair coupling factor                                               |
| Cluster_259563 | 18 | 36 | 6  | 1  | 75  | 97  | NSI+AI | 5.10 | 0.0239 | 0.0122 |              | MASE1 family protein                                                               |
| Cluster_261814 | 6  | 2  | 18 | 35 | 25  | 5   | LI     | 3.34 | 0.0678 | 0.0481 |              | conserved hypothetical protein                                                     |
| Cluster_263937 | 9  | 4  | 15 | 33 | 38  | 11  | LI     | 4.69 | 0.0303 | 0.0231 |              | conserved hypothetical protein                                                     |
| Cluster_263945 | 7  | 2  | 17 | 35 | 29  | 5   | LI     | 4.78 | 0.0288 | 0.0221 |              | conserved hypothetical protein                                                     |
| Cluster_263946 | 7  | 2  | 17 | 35 | 29  | 5   | LI     | 4.78 | 0.0288 | 0.0221 |              | phage major capsid E family protein                                                |
| Cluster_263948 | 7  | 2  | 17 | 35 | 29  | 5   | LI     | 4.78 | 0.0288 | 0.0221 |              | conserved hypothetical protein                                                     |
| Cluster_264521 | 19 | 37 | 5  | 0  | 79  | 100 | NSI+AI | 5.86 | 0.0155 | 0.0071 |              | conserved hypothetical protein                                                     |
| Cluster_265225 | 18 | 37 | 6  | 0  | 75  | 100 | NSI+AI | 7.63 | 0.0057 | 0.0024 |              | PRD domain protein                                                                 |
| Cluster_265334 | 19 | 37 | 5  | 0  | 79  | 100 | NSI+AI | 5.86 | 0.0155 | 0.0071 | <i>mdfA</i>  | multidrug transporter MdfA                                                         |
| Cluster_266191 | 20 | 37 | 4  | 0  | 83  | 100 | NSI+AI | 4.16 | 0.0414 | 0.0204 | <i>yecS</i>  | inner membrane amino-acid ABC transporter permease protein YecS                    |
| Cluster_2667   | 8  | 3  | 16 | 34 | 33  | 8   | LI     | 4.68 | 0.0306 | 0.0180 |              | hypothetical protein                                                               |
| Cluster_269540 | 19 | 37 | 5  | 0  | 79  | 100 | NSI+AI | 5.86 | 0.0155 | 0.0071 | <i>can</i>   | carbonic anhydrase 2                                                               |
| Cluster_272941 | 19 | 17 | 5  | 20 | 79  | 46  | LI     | 5.34 | 0.0208 | 0.0159 |              | phage tail E family protein                                                        |
| Cluster_273556 | 4  | 16 | 20 | 21 | 17  | 43  | NSI+AI | 3.54 | 0.0600 | 0.0496 |              | glycosyltransferase like 2 family protein                                          |
| Cluster_273680 | 20 | 37 | 4  | 0  | 83  | 100 | NSI+AI | 4.16 | 0.0414 | 0.0204 | <i>menD</i>  | 2-succinyl-5-enolpyruvyl-6-hydroxy-3-cyclohexene-1-carboxylic-acid synthase        |
| Cluster_274418 | 4  | 18 | 20 | 19 | 17  | 49  | NSI+AI | 5.15 | 0.0233 | 0.0144 |              | mu-like prophage FluMu gp41 family protein                                         |
| Cluster_275430 | 19 | 37 | 5  | 0  | 79  | 100 | NSI+AI | 5.86 | 0.0155 | 0.0071 | <i>adiC</i>  | arginine/arginine antiporter                                                       |
| Cluster_275815 | 18 | 36 | 6  | 1  | 75  | 97  | NSI+AI | 5.10 | 0.0239 | 0.0122 | <i>gmm</i>   | GDP-mannose mannosyl hydrolase                                                     |
| Cluster_276292 | 19 | 36 | 5  | 1  | 79  | 97  | NSI+AI | 3.55 | 0.0597 | 0.0307 |              | stress-induced bacterial acidophilic repeat motif family protein                   |
| Cluster_276357 | 19 | 36 | 5  | 1  | 79  | 97  | NSI+AI | 3.55 | 0.0597 | 0.0307 |              | type VII secretion system (T7SS), usher family protein                             |
| Cluster_280171 | 18 | 37 | 6  | 0  | 75  | 100 | NSI+AI | 7.63 | 0.0057 | 0.0024 | <i>tatD</i>  | tat-linked quality control protein TatD                                            |
| Cluster_282502 | 18 | 35 | 6  | 2  | 75  | 95  | NSI+AI | 3.34 | 0.0678 | 0.0481 | <i>yphB</i>  | aldose 1-epimerase                                                                 |
| Cluster_282548 | 8  | 3  | 16 | 34 | 33  | 8   | LI     | 4.68 | 0.0306 | 0.0180 |              | putative predicted protein                                                         |
| Cluster_286226 | 19 | 37 | 5  | 0  | 79  | 100 | NSI+AI | 5.86 | 0.0155 | 0.0071 | <i>cybH</i>  | ni/Fe-hydrogenase, b-type cytochrome subunit                                       |
| Cluster_286879 | 6  | 1  | 18 | 36 | 25  | 3   | LI     | 5.10 | 0.0239 | 0.0122 |              | conserved hypothetical protein                                                     |
| Cluster_286883 | 5  | 0  | 19 | 37 | 21  | 0   | LI     | 5.86 | 0.0155 | 0.0071 |              | acetyltransferase domain protein                                                   |
| Cluster_28951  | 4  | 0  | 20 | 37 | 17  | 0   | LI     | 4.16 | 0.0414 | 0.0204 |              | hypothetical protein                                                               |
| Cluster_290242 | 18 | 35 | 6  | 2  | 75  | 95  | NSI+AI | 3.34 | 0.0678 | 0.0481 | <i>yphF</i>  | ABC transporter periplasmic-binding protein YphF                                   |
| Cluster_290560 | 19 | 37 | 5  | 0  | 79  | 100 | NSI+AI | 5.86 | 0.0155 | 0.0071 |              | AAA-like domain protein                                                            |
| Cluster_29582  | 6  | 2  | 18 | 35 | 25  | 5   | LI     | 3.34 | 0.0678 | 0.0481 |              | HNH endonuclease family protein                                                    |
| Cluster_295885 | 18 | 36 | 6  | 1  | 75  | 97  | NSI+AI | 5.10 | 0.0239 | 0.0122 |              | acetyltransferase domain protein                                                   |
| Cluster_296132 | 5  | 18 | 19 | 19 | 21  | 49  | NSI+AI | 3.68 | 0.0549 | 0.0340 |              | ogr/Delta-like zinc finger family protein                                          |
| Cluster_301782 | 5  | 18 | 19 | 19 | 21  | 49  | NSI+AI | 3.68 | 0.0549 | 0.0340 |              | major tail sheath protein                                                          |
| Cluster_301785 | 4  | 18 | 20 | 19 | 17  | 49  | NSI+AI | 5.15 | 0.0233 | 0.0144 |              | phage tail tape measure protein, TP901 family, core region                         |
| Cluster_302107 | 14 | 10 | 10 | 27 | 58  | 27  | LI     | 4.74 | 0.0295 | 0.0181 |              | conserved hypothetical protein                                                     |
| Cluster_305186 | 5  | 18 | 19 | 19 | 21  | 49  | NSI+AI | 3.68 | 0.0549 | 0.0340 |              | phage P2 GpU family protein                                                        |
| Cluster_307747 | 12 | 29 | 12 | 8  | 50  | 78  | NSI+AI | 4.11 | 0.0426 | 0.0277 |              | conserved hypothetical protein                                                     |
| Cluster_312709 | 6  | 2  | 18 | 35 | 25  | 5   | LI     | 3.34 | 0.0678 | 0.0481 |              | amino acid permease family protein                                                 |
| Cluster_312941 | 7  | 3  | 17 | 34 | 29  | 8   | LI     | 3.30 | 0.0693 | 0.0397 |              | putative antirepressor protein                                                     |
| Cluster_313405 | 8  | 4  | 16 | 33 | 33  | 11  | LI     | 3.36 | 0.0669 | 0.0474 |              | luxR family transcriptional regulator                                              |
| Cluster_313761 | 9  | 2  | 15 | 35 | 38  | 5   | LI     | 8.09 | 0.0045 | 0.0043 |              | HNH endonuclease family protein                                                    |
| Cluster_315364 | 6  | 2  | 18 | 35 | 25  | 5   | LI     | 3.34 | 0.0678 | 0.0481 |              | archaeal transcriptional regulator TrmB family protein                             |
| Cluster_315365 | 6  | 2  | 18 | 35 | 25  | 5   | LI     | 3.34 | 0.0678 | 0.0481 |              | ABC transporter family protein                                                     |
| Cluster_315743 | 19 | 37 | 5  | 0  | 79  | 100 | NSI+AI | 5.86 | 0.0155 | 0.0071 | <i>ycdY</i>  | chaperone protein YcdY                                                             |
| Cluster_315801 | 2  | 12 | 22 | 25 | 8   | 32  | NSI+AI | 3.52 | 0.0608 | 0.0335 |              | phage tail protein I                                                               |
| Cluster_317549 | 7  | 3  | 17 | 34 | 29  | 8   | LI     | 3.30 | 0.0693 | 0.0397 |              | ead/Ea22-like family protein                                                       |
| Cluster_317551 | 7  | 3  | 17 | 34 | 29  | 8   | LI     | 3.30 | 0.0693 | 0.0397 |              | conserved hypothetical protein                                                     |
| Cluster_32291  | 18 | 37 | 6  | 0  | 75  | 100 | NSI+AI | 7.63 | 0.0057 | 0.0024 | <i>dcd</i>   | deoxycytidine triphosphate deaminase                                               |
| Cluster_324641 | 18 | 35 | 6  | 2  | 75  | 95  | NSI+AI | 3.34 | 0.0678 | 0.0481 | <i>yphB</i>  | aldose 1-epimerase                                                                 |
| Cluster_333715 | 19 | 36 | 5  | 1  | 79  | 97  | NSI+AI | 3.55 | 0.0597 | 0.0307 | <i>dinI</i>  | DNA-damage-inducible protein I                                                     |
| Cluster_335585 | 19 | 37 | 5  | 0  | 79  | 100 | NSI+AI | 5.86 | 0.0155 | 0.0071 |              | ybgS-like family protein                                                           |
| Cluster_342998 | 17 | 15 | 7  | 22 | 71  | 41  | LI     | 4.21 | 0.0402 | 0.0350 |              | phage tail protein I                                                               |
| Cluster_343372 | 20 | 37 | 4  | 0  | 83  | 100 | NSI+AI | 4.16 | 0.0414 | 0.0204 | <i>leuB</i>  | 3-isopropylmalate dehydrogenase                                                    |
| Cluster_345283 | 19 | 36 | 5  | 1  | 79  | 97  | NSI+AI | 3.55 | 0.0597 | 0.0307 |              | carbon-nitrogen hydrolase                                                          |

|                |    |    |    |    |    |     |        |      |        |        |             |                                                      |
|----------------|----|----|----|----|----|-----|--------|------|--------|--------|-------------|------------------------------------------------------|
| Cluster_347476 | 20 | 20 | 4  | 17 | 83 | 54  | LI     | 4.31 | 0.0379 | 0.0271 |             | conserved hypothetical protein                       |
| Cluster_348353 | 19 | 36 | 5  | 1  | 79 | 97  | NSI+AI | 3.55 | 0.0597 | 0.0307 | <i>yajR</i> | inner membrane transport protein YajR                |
| Cluster_44635  | 17 | 34 | 7  | 3  | 71 | 92  | NSI+AI | 3.30 | 0.0693 | 0.0397 |             | type III secretion , HrpO family protein             |
| Cluster_46213  | 3  | 16 | 21 | 21 | 13 | 43  | NSI+AI | 5.06 | 0.0245 | 0.0127 |             | putative transmembrane protein                       |
| Cluster_5054   | 19 | 36 | 5  | 1  | 79 | 97  | NSI+AI | 3.55 | 0.0597 | 0.0307 |             | uracil-xanthine permease family protein              |
| Cluster_51806  | 19 | 37 | 5  | 0  | 79 | 100 | NSI+AI | 5.86 | 0.0155 | 0.0071 | <i>ptsP</i> | phosphoenolpyruvate-protein phosphotransferase       |
| Cluster_52793  | 19 | 19 | 5  | 18 | 79 | 51  | LI     | 3.68 | 0.0549 | 0.0340 | <i>mngB</i> | mannosylglycerate hydrolase                          |
| Cluster_5286   | 19 | 37 | 5  | 0  | 79 | 100 | NSI+AI | 5.86 | 0.0155 | 0.0071 | <i>atpF</i> | ATP synthase F0, B subunit                           |
| Cluster_58271  | 9  | 4  | 15 | 33 | 38 | 11  | LI     | 4.69 | 0.0303 | 0.0231 |             | conserved hypothetical protein                       |
| Cluster_59004  | 17 | 13 | 7  | 24 | 71 | 35  | LI     | 6.06 | 0.0138 | 0.0090 |             | phage prohead protease, HK97 family                  |
| Cluster_61005  | 20 | 37 | 4  | 0  | 83 | 100 | NSI+AI | 4.16 | 0.0414 | 0.0204 |             | conserved hypothetical protein                       |
| Cluster_67345  | 7  | 3  | 17 | 34 | 29 | 8   | LI     | 3.30 | 0.0693 | 0.0397 |             | conserved hypothetical protein                       |
| Cluster_73598  | 6  | 2  | 18 | 35 | 25 | 5   | LI     | 3.34 | 0.0678 | 0.0481 |             | conserved hypothetical protein                       |
| Cluster_74186  | 6  | 2  | 18 | 35 | 25 | 5   | LI     | 3.34 | 0.0678 | 0.0481 |             | helix-turn-helix domain protein                      |
| Cluster_74420  | 19 | 17 | 5  | 20 | 79 | 46  | LI     | 5.34 | 0.0208 | 0.0159 |             | conserved hypothetical protein                       |
| Cluster_75095  | 5  | 18 | 19 | 19 | 21 | 49  | NSI+AI | 3.68 | 0.0549 | 0.0340 |             | phage major tail tube protein                        |
| Cluster_75099  | 5  | 18 | 19 | 19 | 21 | 49  | NSI+AI | 3.68 | 0.0549 | 0.0340 |             | phage late control gene D family protein             |
| Cluster_76816  | 7  | 3  | 17 | 34 | 29 | 8   | LI     | 3.30 | 0.0693 | 0.0397 |             | putative dsORF-f3                                    |
| Cluster_79549  | 19 | 36 | 5  | 1  | 79 | 97  | NSI+AI | 3.55 | 0.0597 | 0.0307 | <i>prpR</i> | propionate catabolism operon regulatory protein PrpR |
| Cluster_79564  | 6  | 2  | 18 | 35 | 25 | 5   | LI     | 3.34 | 0.0678 | 0.0481 |             | putative oxidoreductase subunit domain protein       |
| Cluster_79937  | 8  | 4  | 16 | 33 | 33 | 11  | LI     | 3.36 | 0.0669 | 0.0474 |             | prophage CP4-57 regulatory family protein            |
| Cluster_80022  | 6  | 2  | 18 | 35 | 25 | 5   | LI     | 3.34 | 0.0678 | 0.0481 |             | alpha amylase, catalytic domain protein              |
| Cluster_81331  | 18 | 37 | 6  | 0  | 75 | 100 | NSI+AI | 7.63 | 0.0057 | 0.0024 |             | lppC lipofamily protein                              |
| Cluster_81348  | 20 | 37 | 4  | 0  | 83 | 100 | NSI+AI | 4.16 | 0.0414 | 0.0204 | <i>prp</i>  | polyribonucleotide nucleotidyltransferase            |
| Cluster_81842  | 19 | 36 | 5  | 1  | 79 | 97  | NSI+AI | 3.55 | 0.0597 | 0.0307 |             | MATE efflux family protein                           |
| Cluster_81862  | 19 | 36 | 5  | 1  | 79 | 97  | NSI+AI | 3.55 | 0.0597 | 0.0307 |             | conserved hypothetical protein                       |
| Cluster_83084  | 19 | 37 | 5  | 0  | 79 | 100 | NSI+AI | 5.86 | 0.0155 | 0.0071 | <i>purD</i> | phosphoribosylamine-glycine ligase                   |
| Cluster_83254  | 6  | 1  | 18 | 36 | 25 | 3   | LI     | 5.10 | 0.0239 | 0.0122 |             | glycosyl transferases group 1 family protein         |
| Cluster_83903  | 8  | 4  | 16 | 33 | 33 | 11  | LI     | 3.36 | 0.0669 | 0.0474 |             | conserved hypothetical protein                       |
| Cluster_83927  | 6  | 0  | 18 | 37 | 25 | 0   | LI     | 7.63 | 0.0057 | 0.0024 | <i>fdtA</i> | dTDP-6-deoxy-3,4-keto-hexulose isomerase             |
| Cluster_83929  | 6  | 0  | 18 | 37 | 25 | 0   | LI     | 7.63 | 0.0057 | 0.0024 | <i>rtbB</i> | dTDP-glucose 4,6-dehydratase                         |
| Cluster_84140  | 6  | 2  | 18 | 35 | 25 | 5   | LI     | 3.34 | 0.0678 | 0.0481 |             | putative cymA protein                                |
| Cluster_87728  | 19 | 37 | 5  | 0  | 79 | 100 | NSI+AI | 5.86 | 0.0155 | 0.0071 | <i>phrB</i> | deoxyribodipyrimidine photo-lyase                    |
| Cluster_93726  | 19 | 37 | 5  | 0  | 79 | 100 | NSI+AI | 5.86 | 0.0155 | 0.0071 | <i>tolA</i> | protein TolA                                         |
| Cluster_94431  | 0  | 7  | 24 | 30 | 0  | 19  | NSI+AI | 3.44 | 0.0638 | 0.0358 |             | hypothetical protein                                 |
| Cluster_95057  | 7  | 3  | 17 | 34 | 29 | 8   | LI     | 3.30 | 0.0693 | 0.0397 |             | P22AR C-terminal domain protein                      |
| Cluster_95290  | 8  | 4  | 16 | 33 | 33 | 11  | LI     | 3.36 | 0.0669 | 0.0474 |             | invH outer membrane lipofamily protein               |
| Cluster_97263  | 19 | 36 | 5  | 1  | 79 | 97  | NSI+AI | 3.55 | 0.0597 | 0.0307 | <i>cadA</i> | cadmium-translocating P-type ATPase                  |
| Cluster_97497  | 19 | 36 | 5  | 1  | 79 | 97  | NSI+AI | 3.55 | 0.0597 | 0.0307 | <i>tolA</i> | protein TolA                                         |
| Cluster_99077  | 4  | 16 | 20 | 21 | 17 | 43  | NSI+AI | 3.54 | 0.0600 | 0.0496 |             | cysteine protease , YopT-type domain protein         |
| Cluster_99113  | 16 | 13 | 8  | 24 | 67 | 35  | LI     | 4.61 | 0.0318 | 0.0201 |             | putative membrane protein                            |
| Cluster_99274  | 8  | 4  | 16 | 33 | 33 | 11  | LI     | 3.36 | 0.0669 | 0.0474 |             | putative t3SS effector protein EspS                  |
| Cluster_99362  | 14 | 10 | 10 | 27 | 58 | 27  | LI     | 4.74 | 0.0295 | 0.0181 |             | resolvase, N terminal domain protein                 |
| Cluster_99439  | 6  | 2  | 18 | 35 | 25 | 5   | LI     | 3.34 | 0.0678 | 0.0481 |             | putative dsORF-e4                                    |

<sup>a</sup>Genes were grouped into gene clusters using a "stringent" clustering threshold of ≥90% nucleotide identity.

<sup>b</sup>Gene clusters identified as "present" have a TBLASTN LS-BSR ≥0.9, while those that are "absent" have a TBLASTN LS-BSR <0.9.

<sup>c</sup>Clinical outcomes are classified as lethal (LI), non-lethal symptomatic (NSI), and asymptomatic (AI).

**Table S6.** Genes identified by LS-BSR that are significantly correlated with one clinical outcome over another for all 70 EPEC genomes analyzed using an inclusive clustering threshold

| Lethal (LI) vs. Non-lethal Symptomatic (NSI) |                |     |    |                                          |      |       |                  |           |                     |         |                            |                                                          |         |
|----------------------------------------------|----------------|-----|----|------------------------------------------|------|-------|------------------|-----------|---------------------|---------|----------------------------|----------------------------------------------------------|---------|
| Cluster ID                                   | No. of Genomes |     |    | Percentage of Genomes Containing Cluster |      |       | Chi-squared test |           | Fisher's exact test | Gene ID | Predicted Protein Function | Membrane or Secretion Domains                            |         |
|                                              | LI             | NSI | LI | NSI                                      | % LI | % NSI | Greater %        | statistic | p-value             |         |                            |                                                          | p-value |
| Cluster_175606                               | 6              | 0   | 18 | 23                                       | 25   | 0     | LI               | 4.54      | 0.0332              | 0.0219  | <i>fdtA</i>                | dTDP-6-deoxy-3,4-keto-hexulose isomerase                 | N       |
| Cluster_222636                               | 6              | 0   | 18 | 23                                       | 25   | 0     | LI               | 4.54      | 0.0332              | 0.0219  | <i>rfbA</i>                | glucose-1-phosphate thymidyltransferase                  | N       |
| Cluster_147640                               | 11             | 3   | 13 | 20                                       | 46   | 13    | LI               | 4.57      | 0.0325              | 0.0243  |                            | conserved hypothetical protein                           | Y       |
| Cluster_112366                               | 4              | 11  | 20 | 12                                       | 17   | 48    | NSI              | 3.91      | 0.0479              | 0.0305  |                            | mu-like prophage FlUmu gp41 family protein               | N       |
| Cluster_252971                               | 20             | 12  | 4  | 11                                       | 83   | 52    | LI               | 3.91      | 0.0479              | 0.0305  |                            | HNH endonuclease family protein                          | N       |
| Cluster_196142                               | 19             | 11  | 5  | 12                                       | 79   | 48    | LI               | 3.73      | 0.0534              | 0.0355  |                            | conserved hypothetical protein                           | N       |
| Cluster_140609                               | 2              | 8   | 22 | 15                                       | 8    | 35    | NSI              | 3.45      | 0.0631              | 0.0363  |                            | conserved hypothetical protein                           | N       |
| Cluster_243755                               | 15             | 7   | 9  | 16                                       | 63   | 30    | LI               | 3.65      | 0.0561              | 0.0415  |                            | ASCH domain protein                                      | N       |
| Cluster_98923                                | 17             | 9   | 7  | 14                                       | 71   | 39    | LI               | 3.58      | 0.0585              | 0.0415  |                            | bacteriophage lysis family protein                       | Y       |
| Cluster_236134                               | 16             | 8   | 8  | 15                                       | 67   | 35    | LI               | 3.59      | 0.0582              | 0.0422  | <i>dhfrI</i>               | dihydrofolate reductase type 1                           | N       |
| Cluster_123546                               | 1              | 6   | 23 | 17                                       | 4    | 26    | NSI              | 2.89      | 0.0891              | 0.0479  |                            | phosphoadenosine phosphosulfate reductase family protein | N       |
| Cluster_123571                               | 1              | 6   | 23 | 17                                       | 4    | 26    | NSI              | 2.89      | 0.0891              | 0.0479  |                            | ABC transporter family protein                           | Y       |
| Cluster_160926                               | 1              | 6   | 23 | 17                                       | 4    | 26    | NSI              | 2.89      | 0.0891              | 0.0479  |                            | helix-turn-helix domain protein                          | N       |
| Cluster_214112                               | 1              | 6   | 23 | 17                                       | 4    | 26    | NSI              | 2.89      | 0.0891              | 0.0479  |                            | phage tail-collar fibre family protein                   | Y       |
| Cluster_216712                               | 1              | 6   | 23 | 17                                       | 4    | 26    | NSI              | 2.89      | 0.0891              | 0.0479  |                            | putative membrane protein                                | Y       |
| Cluster_217182                               | 1              | 6   | 23 | 17                                       | 4    | 26    | NSI              | 2.89      | 0.0891              | 0.0479  | <i>fyuA</i>                | pesticin receptor                                        | Y       |
| Cluster_217185                               | 1              | 6   | 23 | 17                                       | 4    | 26    | NSI              | 2.89      | 0.0891              | 0.0479  | <i>ybtU</i>                | yersiniabactin biosynthetic protein YbtU                 | N       |
| Cluster_217187                               | 1              | 6   | 23 | 17                                       | 4    | 26    | NSI              | 2.89      | 0.0891              | 0.0479  |                            | amino acid adenylation domain protein                    | N       |
| Cluster_217190                               | 1              | 6   | 23 | 17                                       | 4    | 26    | NSI              | 2.89      | 0.0891              | 0.0479  |                            | ABC transporter family protein                           | Y       |
| Cluster_217193                               | 1              | 6   | 23 | 17                                       | 4    | 26    | NSI              | 2.89      | 0.0891              | 0.0479  |                            | phage integrase family protein                           | N       |
| Cluster_217459                               | 1              | 6   | 23 | 17                                       | 4    | 26    | NSI              | 2.89      | 0.0891              | 0.0479  |                            | HTH domain protein                                       | N       |
| Cluster_284866                               | 7              | 1   | 17 | 22                                       | 29   | 4     | LI               | 3.52      | 0.0608              | 0.0479  |                            | bacterial regulatory, tetR family protein                | N       |
| Cluster_305198                               | 1              | 6   | 23 | 17                                       | 4    | 26    | NSI              | 2.89      | 0.0891              | 0.0479  |                            | conserved hypothetical protein                           | Y       |
| Cluster_307421                               | 1              | 6   | 23 | 17                                       | 4    | 26    | NSI              | 2.89      | 0.0891              | 0.0479  |                            | alpha/beta hydrolase family protein                      | N       |
| Cluster_307423                               | 1              | 6   | 23 | 17                                       | 4    | 26    | NSI              | 2.89      | 0.0891              | 0.0479  |                            | methyltransferase family protein                         | N       |
| Cluster_307429                               | 1              | 6   | 23 | 17                                       | 4    | 26    | NSI              | 2.89      | 0.0891              | 0.0479  |                            | salicylate synthase                                      | N       |
| Cluster_48358                                | 1              | 6   | 23 | 17                                       | 4    | 26    | NSI              | 2.89      | 0.0891              | 0.0479  |                            | major Facilitator Superfamily protein                    | Y       |
| Cluster_99052                                | 1              | 6   | 23 | 17                                       | 4    | 26    | NSI              | 2.89      | 0.0891              | 0.0479  |                            | conserved hypothetical protein                           | Y       |
| Cluster_14414                                | 10             | 3   | 14 | 20                                       | 42   | 13    | LI               | 3.48      | 0.0619              | 0.0490  |                            | conserved hypothetical protein                           | N       |
| Cluster_14423                                | 10             | 3   | 14 | 20                                       | 42   | 13    | LI               | 3.48      | 0.0619              | 0.0490  |                            | conserved hypothetical protein                           | N       |
| Cluster_175608                               | 5              | 0   | 19 | 23                                       | 21   | 0     | LI               | 3.39      | 0.0654              | 0.0496  |                            | degT/DnrJ/EryC1/StrS aminotransferase family protein     | N       |
| Cluster_247403                               | 5              | 0   | 19 | 23                                       | 21   | 0     | LI               | 3.39      | 0.0654              | 0.0496  |                            | glycosyl transferase 2 family protein                    | N       |
| Cluster_83926                                | 5              | 0   | 19 | 23                                       | 21   | 0     | LI               | 3.39      | 0.0654              | 0.0496  |                            | acetyltransferase domain protein                         | N       |
| Cluster_121796                               | 0              | 4   | 24 | 19                                       | 0    | 17    | NSI              | 2.60      | 0.1067              | 0.0496  |                            | caudovirales tail fibre assembly family protein          | N       |
| Cluster_121973                               | 0              | 4   | 24 | 19                                       | 0    | 17    | NSI              | 2.60      | 0.1067              | 0.0496  |                            | conserved hypothetical protein                           | N       |
| Cluster_163539                               | 0              | 4   | 24 | 19                                       | 0    | 17    | NSI              | 2.60      | 0.1067              | 0.0496  |                            | hypothetical protein                                     | N       |
| Cluster_188256                               | 0              | 4   | 24 | 19                                       | 0    | 17    | NSI              | 2.60      | 0.1067              | 0.0496  |                            | conserved hypothetical protein                           | Y       |
| Cluster_217181                               | 0              | 4   | 24 | 19                                       | 0    | 17    | NSI              | 2.60      | 0.1067              | 0.0496  |                            | conserved hypothetical protein                           | N       |
| Cluster_8046                                 | 0              | 4   | 24 | 19                                       | 0    | 17    | NSI              | 2.60      | 0.1067              | 0.0496  |                            | hypothetical protein                                     | N       |

| Lethal (LI) vs. Asymptomatic (AI) |                |    |    |                                          |      |      |                  |           |                     |         |                            |                                                                           |         |
|-----------------------------------|----------------|----|----|------------------------------------------|------|------|------------------|-----------|---------------------|---------|----------------------------|---------------------------------------------------------------------------|---------|
| Cluster ID                        | No. of Genomes |    |    | Percentage of Genomes Containing Cluster |      |      | Chi-squared test |           | Fisher's exact test | Gene ID | Predicted Protein Function | Membrane or Secretion Domains                                             |         |
|                                   | LI             | AI | LI | AI                                       | % LI | % AI | Greater %        | statistic | p-value             |         |                            |                                                                           | p-value |
| Cluster_34159                     | 13             | 2  | 11 | 21                                       | 54   | 9    | LI               | 9.18      | 0.0024              | 0.0013  |                            | conserved hypothetical protein                                            | N       |
| Cluster_262069                    | 12             | 2  | 12 | 21                                       | 50   | 9    | LI               | 7.71      | 0.0055              | 0.0034  |                            | istB-like ATP binding family protein                                      | N       |
| Cluster_267235                    | 12             | 2  | 12 | 21                                       | 50   | 9    | LI               | 7.71      | 0.0055              | 0.0034  |                            | hypothetical protein                                                      | N       |
| Cluster_289981                    | 12             | 2  | 12 | 21                                       | 50   | 9    | LI               | 7.71      | 0.0055              | 0.0034  |                            | integrase core domain protein                                             | N       |
| Cluster_341980                    | 22             | 12 | 2  | 11                                       | 92   | 52   | LI               | 7.29      | 0.0069              | 0.0034  |                            | conserved hypothetical protein                                            | Y       |
| Cluster_307754                    | 18             | 7  | 6  | 16                                       | 75   | 30   | LI               | 7.66      | 0.0056              | 0.0034  | <i>cro</i>                 | regulatory protein cro                                                    | N       |
| Cluster_327168                    | 18             | 7  | 6  | 16                                       | 75   | 30   | LI               | 7.66      | 0.0056              | 0.0034  |                            | helix-turn-helix domain protein                                           | N       |
| Cluster_147543                    | 8              | 0  | 16 | 23                                       | 33   | 0    | LI               | 7.03      | 0.0080              | 0.0039  |                            | putative yfdA                                                             | Y       |
| Cluster_157448                    | 1              | 9  | 23 | 14                                       | 4    | 39   | AI               | 6.61      | 0.0101              | 0.0044  | <i>espS</i>                | putative T3SS effector protein EspS                                       | N       |
| Cluster_14414                     | 10             | 1  | 14 | 22                                       | 42   | 4    | LI               | 7.16      | 0.0074              | 0.0044  |                            | conserved hypothetical protein                                            | N       |
| Cluster_58277                     | 10             | 1  | 14 | 22                                       | 42   | 4    | LI               | 7.16      | 0.0074              | 0.0044  |                            | helix-turn-helix, Psq domain protein                                      | N       |
| Cluster_260984                    | 13             | 3  | 11 | 20                                       | 54   | 13   | LI               | 7.11      | 0.0077              | 0.0050  | <i>traN</i>                | type-F conjugative transfer system mating-pair stabilization protein TraN | Y       |
| Cluster_169965                    | 4              | 13 | 20 | 10                                       | 17   | 57   | AI               | 6.45      | 0.0111              | 0.0065  |                            | ogr/Delta-like zinc finger family protein                                 | N       |
| Cluster_200452                    | 4              | 13 | 20 | 10                                       | 17   | 57   | AI               | 6.45      | 0.0111              | 0.0065  |                            | putative prophage protein                                                 | N       |
| Cluster_200454                    | 4              | 13 | 20 | 10                                       | 17   | 57   | AI               | 6.45      | 0.0111              | 0.0065  |                            | putative phage immunity repressor protein                                 | N       |
| Cluster_271578                    | 4              | 13 | 20 | 10                                       | 17   | 57   | AI               | 6.45      | 0.0111              | 0.0065  |                            | conserved hypothetical protein                                            | N       |
| Cluster_316955                    | 4              | 13 | 20 | 10                                       | 17   | 57   | AI               | 6.45      | 0.0111              | 0.0065  |                            | helix-turn-helix domain protein                                           | N       |
| Cluster_63459                     | 4              | 13 | 20 | 10                                       | 17   | 57   | AI               | 6.45      | 0.0111              | 0.0065  |                            | putative derepression protein                                             | N       |
| Cluster_252971                    | 20             | 10 | 4  | 13                                       | 83   | 43   | LI               | 6.45      | 0.0111              | 0.0065  |                            | HNH endonuclease family protein                                           | N       |
| Cluster_83828                     | 19             | 9  | 5  | 14                                       | 79   | 39   | LI               | 6.24      | 0.0125              | 0.0077  |                            | conserved hypothetical protein                                            | N       |
| Cluster_56014                     | 22             | 13 | 2  | 10                                       | 92   | 57   | LI               | 5.89      | 0.0152              | 0.0078  |                            | hydantoinase/oxoprolinase family protein                                  | N       |
| Cluster_107351                    | 11             | 2  | 13 | 21                                       | 46   | 9    | LI               | 6.35      | 0.0118              | 0.0078  |                            | conserved hypothetical protein                                            | N       |
| Cluster_183593                    | 11             | 2  | 13 | 21                                       | 46   | 9    | LI               | 6.35      | 0.0118              | 0.0078  |                            | conserved hypothetical protein                                            | N       |
| Cluster_276264                    | 11             | 2  | 13 | 21                                       | 46   | 9    | LI               | 6.35      | 0.0118              | 0.0078  |                            | replication regulatory RepB family protein                                | N       |
| Cluster_312794                    | 11             | 2  | 13 | 21                                       | 46   | 9    | LI               | 6.35      | 0.0118              | 0.0078  |                            | transposase DDE domain protein                                            | N       |
| Cluster_236134                    | 16             | 6  | 8  | 17                                       | 67   | 26   | LI               | 6.22      | 0.0126              | 0.0084  | <i>dhfrI</i>               | dihydrofolate reductase type 1                                            | N       |
| Cluster_346831                    | 16             | 6  | 8  | 17                                       | 67   | 26   | LI               | 6.22      | 0.0126              | 0.0084  |                            | conserved hypothetical protein                                            | N       |
| Cluster_43705                     | 18             | 8  | 6  | 15                                       | 75   | 35   | LI               | 6.14      | 0.0132              | 0.0084  |                            | conserved hypothetical protein                                            | Y       |
| Cluster_222333                    | 17             | 7  | 7  | 16                                       | 71   | 30   | LI               | 6.14      | 0.0132              | 0.0087  |                            | phage major capsid protein, HK97 family                                   | N       |
| Cluster_59004                     | 17             | 7  | 7  | 16                                       | 71   | 30   | LI               | 6.14      | 0.0132              | 0.0087  |                            | phage prohead protease, HK97 family                                       | N       |
| Cluster_106122                    | 7              | 0  | 17 | 23                                       | 29   | 0    | LI               | 5.75      | 0.0165              | 0.0094  |                            | conserved hypothetical protein                                            | N       |
| Cluster_115298                    | 7              | 0  | 17 | 23                                       | 29   | 0    | LI               | 5.75      | 0.0165              | 0.0094  |                            | conserved hypothetical protein                                            | N       |
| Cluster_166190                    | 7              | 0  | 17 | 23                                       | 29   | 0    | LI               | 5.75      | 0.0165              | 0.0094  |                            | phage integrase family protein                                            | N       |
| Cluster_240829                    | 7              | 0  | 17 | 23                                       | 29   | 0    | LI               | 5.75      | 0.0165              | 0.0094  |                            | hypothetical protein                                                      | N       |
| Cluster_261817                    | 7              | 0  | 17 | 23                                       | 29   | 0    | LI               | 5.75      | 0.0165              | 0.0094  |                            | putative predicted protein                                                | N       |
| Cluster_262291                    | 17             | 23 | 7  | 0                                        | 71   | 100  | AI               | 5.75      | 0.0165              | 0.0094  |                            | type III secretion , HrpO family protein                                  | Y       |
| Cluster_263945                    | 7              | 0  | 17 | 23                                       | 29   | 0    | LI               | 5.75      | 0.0165              | 0.0094  |                            | conserved hypothetical protein                                            | N       |
| Cluster_74193                     | 7              | 0  | 17 | 23                                       | 29   | 0    | LI               | 5.75      | 0.0165              | 0.0094  |                            | phage major capsid E family protein                                       | N       |
| Cluster_3723                      | 0              | 6  | 24 | 17                                       | 0    | 26   | AI               | 5.03      | 0.0250              | 0.0094  |                            | conserved hypothetical protein                                            | N       |
| Cluster_13383                     | 9              | 1  | 15 | 22                                       | 38   | 4    | LI               | 5.85      | 0.0155              | 0.0102  |                            | conserved hypothetical protein                                            | N       |
| Cluster_183140                    | 9              | 1  | 15 | 22                                       | 38   | 4    | LI               | 5.85      | 0.0155              | 0.0102  |                            | putative escherichia coli chi7122 chi7122 genomic chromosome, chi7122     | Y       |
| Cluster_227359                    | 9              | 1  | 15 | 22                                       | 38   | 4    | LI               | 5.85      | 0.0155              | 0.0102  |                            | conserved hypothetical protein                                            | N       |
| Cluster_227360                    | 9              | 1  | 15 | 22                                       | 38   | 4    | LI               | 5.85      | 0.0155              | 0.0102  |                            | putative membrane protein                                                 | Y       |
| Cluster_276738                    | 23             | 15 | 1  | 8                                        | 96   | 65   | LI               | 5.27      | 0.0217              | 0.0102  |                            | putative protein                                                          | Y       |

|                |    |    |    |    |     |    |    |      |        |        |             |                                                                   |   |
|----------------|----|----|----|----|-----|----|----|------|--------|--------|-------------|-------------------------------------------------------------------|---|
| Cluster_340919 | 23 | 15 | 1  | 8  | 96  | 65 | LI | 5.27 | 0.0217 | 0.0102 |             | winged helix-turn-helix DNA-binding family protein                | N |
| Cluster_90939  | 21 | 12 | 3  | 11 | 88  | 52 | LI | 5.42 | 0.0199 | 0.0114 |             | plasmid stability family protein                                  | N |
| Cluster_225861 | 3  | 11 | 21 | 12 | 13  | 48 | AI | 5.42 | 0.0199 | 0.0114 | <i>psu</i>  | polarity suppression protein                                      | N |
| Cluster_225859 | 4  | 12 | 20 | 11 | 17  | 52 | AI | 5.11 | 0.0238 | 0.0145 |             | putative glyco3, capsid size determination protein Sid            | N |
| Cluster_88073  | 20 | 11 | 4  | 12 | 83  | 48 | LI | 5.11 | 0.0238 | 0.0145 |             | small Multidrug Resistance family protein                         | Y |
| Cluster_166870 | 19 | 10 | 5  | 13 | 79  | 43 | LI | 4.91 | 0.0267 | 0.0171 |             | integron integrase family protein                                 | N |
| Cluster_14423  | 10 | 2  | 14 | 21 | 42  | 9  | LI | 5.09 | 0.0240 | 0.0173 |             | conserved hypothetical protein                                    | N |
| Cluster_178309 | 22 | 14 | 2  | 9  | 92  | 61 | LI | 4.61 | 0.0317 | 0.0173 |             | conserved hypothetical protein                                    | N |
| Cluster_79151  | 22 | 14 | 2  | 9  | 92  | 61 | LI | 4.61 | 0.0317 | 0.0173 |             | bundlin family protein                                            | Y |
| Cluster_18413  | 18 | 9  | 6  | 14 | 75  | 39 | LI | 4.80 | 0.0284 | 0.0189 |             | resolvase, N terminal domain protein                              | N |
| Cluster_312629 | 18 | 9  | 6  | 14 | 75  | 39 | LI | 4.80 | 0.0284 | 0.0189 |             | resolvase, N terminal domain protein                              | N |
| Cluster_43605  | 18 | 9  | 6  | 14 | 75  | 39 | LI | 4.80 | 0.0284 | 0.0189 |             | HNH endonuclease family protein                                   | N |
| Cluster_222331 | 16 | 7  | 8  | 16 | 67  | 30 | LI | 4.81 | 0.0284 | 0.0199 |             | phage portal protein, HK97 family                                 | N |
| Cluster_266615 | 16 | 7  | 8  | 16 | 67  | 30 | LI | 4.81 | 0.0284 | 0.0199 |             | putative yubO                                                     | N |
| Cluster_106126 | 6  | 0  | 18 | 23 | 25  | 0  | LI | 4.54 | 0.0332 | 0.0219 |             | conserved hypothetical protein                                    | N |
| Cluster_115308 | 6  | 0  | 18 | 23 | 25  | 0  | LI | 4.54 | 0.0332 | 0.0219 |             | helix-turn-helix domain protein                                   | Y |
| Cluster_139135 | 6  | 0  | 18 | 23 | 25  | 0  | LI | 4.54 | 0.0332 | 0.0219 |             | putative pyridoxamine 5-phosphate-dependent dehydrase             | N |
| Cluster_152085 | 6  | 0  | 18 | 23 | 25  | 0  | LI | 4.54 | 0.0332 | 0.0219 |             | conserved hypothetical protein                                    | N |
| Cluster_168916 | 0  | 5  | 24 | 18 | 0   | 22 | AI | 3.78 | 0.0520 | 0.0219 |             | nucleoside transporter family protein                             | Y |
| Cluster_175606 | 6  | 0  | 18 | 23 | 25  | 0  | LI | 4.54 | 0.0332 | 0.0219 | <i>fdtA</i> | dTDP-6-deoxy-3,4-keto-hexulose isomerase                          | N |
| Cluster_221922 | 6  | 0  | 18 | 23 | 25  | 0  | LI | 4.54 | 0.0332 | 0.0219 |             | glycosyl transferase family 2 domain protein                      | N |
| Cluster_222636 | 6  | 0  | 18 | 23 | 25  | 0  | LI | 4.54 | 0.0332 | 0.0219 | <i>rfbA</i> | glucose-1-phosphate thymidyltransferase                           | N |
| Cluster_247401 | 6  | 0  | 18 | 23 | 25  | 0  | LI | 4.54 | 0.0332 | 0.0219 |             | polysaccharide biosynthesis/export family protein                 | N |
| Cluster_25983  | 6  | 0  | 18 | 23 | 25  | 0  | LI | 4.54 | 0.0332 | 0.0219 |             | bacteriophage replication gene A family protein                   | N |
| Cluster_266659 | 24 | 18 | 0  | 5  | 100 | 78 | LI | 3.78 | 0.0520 | 0.0219 | <i>repA</i> | incFII family plasmid replication initiator RepA                  | N |
| Cluster_291294 | 6  | 0  | 18 | 23 | 25  | 0  | LI | 4.54 | 0.0332 | 0.0219 |             | putative pyridoxamine 5-phosphate-dependent dehydrase             | Y |
| Cluster_316809 | 0  | 5  | 24 | 18 | 0   | 22 | AI | 3.78 | 0.0520 | 0.0219 |             | conserved hypothetical protein                                    | N |
| Cluster_82368  | 6  | 0  | 18 | 23 | 25  | 0  | LI | 4.54 | 0.0332 | 0.0219 | <i>fljC</i> | flagellin                                                         | N |
| Cluster_83254  | 6  | 0  | 18 | 23 | 25  | 0  | LI | 4.54 | 0.0332 | 0.0219 |             | glycosyl transferases group 1 family protein                      | N |
| Cluster_83929  | 6  | 0  | 18 | 23 | 25  | 0  | LI | 4.54 | 0.0332 | 0.0219 | <i>rfbB</i> | dTDP-glucose 4,6-dehydratase                                      | N |
| Cluster_84063  | 6  | 0  | 18 | 23 | 25  | 0  | LI | 4.54 | 0.0332 | 0.0219 |             | polysaccharide biosynthesis/export family protein                 | Y |
| Cluster_124501 | 8  | 1  | 16 | 22 | 33  | 4  | LI | 4.64 | 0.0313 | 0.0226 |             | DNA N-6-adenine-methyltransferase family protein                  | N |
| Cluster_128383 | 8  | 1  | 16 | 22 | 33  | 4  | LI | 4.64 | 0.0313 | 0.0226 |             | conserved hypothetical protein                                    | N |
| Cluster_128390 | 8  | 1  | 16 | 22 | 33  | 4  | LI | 4.64 | 0.0313 | 0.0226 |             | viral (Super1) RNA helicase family protein                        | N |
| Cluster_164940 | 8  | 1  | 16 | 22 | 33  | 4  | LI | 4.64 | 0.0313 | 0.0226 |             | AAA domain protein                                                | N |
| Cluster_276697 | 8  | 1  | 16 | 22 | 33  | 4  | LI | 4.64 | 0.0313 | 0.0226 |             | conserved hypothetical protein                                    | N |
| Cluster_291795 | 8  | 1  | 16 | 22 | 33  | 4  | LI | 4.64 | 0.0313 | 0.0226 |             | putative acetyltransferase                                        | Y |
| Cluster_297253 | 23 | 16 | 1  | 7  | 96  | 70 | LI | 4.03 | 0.0447 | 0.0226 |             | transposase, Mutator family protein                               | Y |
| Cluster_316814 | 1  | 7  | 23 | 16 | 4   | 30 | AI | 4.03 | 0.0447 | 0.0226 |             | AAA domain protein                                                | N |
| Cluster_321659 | 23 | 16 | 1  | 7  | 96  | 70 | LI | 4.03 | 0.0447 | 0.0226 | <i>bfpA</i> | major structural subunit of bundle-forming pilus                  | Y |
| Cluster_336502 | 23 | 16 | 1  | 7  | 96  | 70 | LI | 4.03 | 0.0447 | 0.0226 |             | type II/IV secretion system family protein                        | N |
| Cluster_53910  | 1  | 7  | 23 | 16 | 4   | 30 | AI | 4.03 | 0.0447 | 0.0226 | <i>intA</i> | prophage CP4-57 integrase                                         | N |
| Cluster_59092  | 8  | 1  | 16 | 22 | 33  | 4  | LI | 4.64 | 0.0313 | 0.0226 |             | conserved hypothetical protein                                    | N |
| Cluster_67359  | 1  | 7  | 23 | 16 | 4   | 30 | AI | 4.03 | 0.0447 | 0.0226 | <i>intA</i> | prophage CP4-57 integrase                                         | N |
| Cluster_73497  | 8  | 1  | 16 | 22 | 33  | 4  | LI | 4.64 | 0.0313 | 0.0226 |             | conserved hypothetical protein                                    | N |
| Cluster_94384  | 23 | 16 | 1  | 7  | 96  | 70 | LI | 4.03 | 0.0447 | 0.0226 |             | transposase, Mutator family protein                               | N |
| Cluster_98944  | 8  | 1  | 16 | 22 | 33  | 4  | LI | 4.64 | 0.0313 | 0.0226 |             | conserved hypothetical protein                                    | N |
| Cluster_99052  | 1  | 7  | 23 | 16 | 4   | 30 | AI | 4.03 | 0.0447 | 0.0226 |             | conserved hypothetical protein                                    | Y |
| Cluster_316740 | 21 | 13 | 3  | 10 | 88  | 57 | LI | 4.19 | 0.0406 | 0.0243 |             | conserved hypothetical protein                                    | Y |
| Cluster_342430 | 21 | 13 | 3  | 10 | 88  | 57 | LI | 4.19 | 0.0406 | 0.0243 |             | conserved hypothetical protein                                    | N |
| Cluster_99069  | 21 | 13 | 3  | 10 | 88  | 57 | LI | 4.19 | 0.0406 | 0.0243 |             | haemolysin expression modulating family protein                   | N |
| Cluster_177188 | 11 | 3  | 13 | 20 | 46  | 13 | LI | 4.57 | 0.0325 | 0.0243 |             | phage integrase family protein                                    | N |
| Cluster_316843 | 13 | 20 | 11 | 3  | 54  | 87 | AI | 4.57 | 0.0325 | 0.0243 |             | transglycosylase SLT domain protein                               | Y |
| Cluster_112366 | 4  | 11 | 20 | 12 | 17  | 48 | AI | 3.91 | 0.0479 | 0.0305 |             | mu-like prophage FliuMu gp41 family protein                       | N |
| Cluster_237277 | 12 | 4  | 12 | 19 | 50  | 17 | LI | 4.20 | 0.0403 | 0.0305 |             | conserved hypothetical protein                                    | N |
| Cluster_277010 | 20 | 12 | 4  | 11 | 83  | 52 | LI | 3.91 | 0.0479 | 0.0305 |             | transposase DDE domain protein                                    | Y |
| Cluster_303065 | 12 | 4  | 12 | 19 | 50  | 17 | LI | 4.20 | 0.0403 | 0.0305 |             | conserved hypothetical protein                                    | N |
| Cluster_337159 | 12 | 4  | 12 | 19 | 50  | 17 | LI | 4.20 | 0.0403 | 0.0305 |             | conserved hypothetical protein                                    | N |
| Cluster_342585 | 20 | 12 | 4  | 11 | 83  | 52 | LI | 3.91 | 0.0479 | 0.0305 | <i>folP</i> | dihydropteroate synthase                                          | N |
| Cluster_48952  | 12 | 4  | 12 | 19 | 50  | 17 | LI | 4.20 | 0.0403 | 0.0305 |             | conserved hypothetical protein                                    | N |
| Cluster_74298  | 12 | 4  | 12 | 19 | 50  | 17 | LI | 4.20 | 0.0403 | 0.0305 |             | traP family protein                                               | Y |
| Cluster_78370  | 12 | 4  | 12 | 19 | 50  | 17 | LI | 4.20 | 0.0403 | 0.0305 |             | putative predicted protein                                        | N |
| Cluster_302692 | 13 | 5  | 11 | 18 | 54  | 22 | LI | 3.94 | 0.0470 | 0.0355 |             | hypothetical protein                                              | N |
| Cluster_56633  | 13 | 5  | 11 | 18 | 54  | 22 | LI | 3.94 | 0.0470 | 0.0355 |             | conserved hypothetical protein                                    | N |
| Cluster_84849  | 13 | 5  | 11 | 18 | 54  | 22 | LI | 3.94 | 0.0470 | 0.0355 |             | conserved hypothetical protein                                    | N |
| Cluster_210977 | 2  | 8  | 22 | 15 | 8   | 35 | AI | 3.45 | 0.0631 | 0.0363 |             | conserved hypothetical protein                                    | N |
| Cluster_261646 | 22 | 15 | 2  | 8  | 92  | 65 | LI | 3.45 | 0.0631 | 0.0363 |             | phage/conjugal plasmid C-4 type zinc finger , TraR family protein | N |
| Cluster_263620 | 9  | 2  | 15 | 21 | 38  | 9  | LI | 3.95 | 0.0469 | 0.0363 |             | transposase DDE domain protein                                    | N |
| Cluster_263937 | 9  | 2  | 15 | 21 | 38  | 9  | LI | 3.95 | 0.0469 | 0.0363 |             | conserved hypothetical protein                                    | N |
| Cluster_297449 | 2  | 8  | 22 | 15 | 8   | 35 | AI | 3.45 | 0.0631 | 0.0363 |             | conserved hypothetical protein                                    | N |
| Cluster_341683 | 22 | 15 | 2  | 8  | 92  | 65 | LI | 3.45 | 0.0631 | 0.0363 |             | bacterial type II and III secretion system family protein         | Y |
| Cluster_59081  | 22 | 15 | 2  | 8  | 92  | 65 | LI | 3.45 | 0.0631 | 0.0363 |             | type II secretion system (T2SS), F family protein                 | Y |
| Cluster_72088  | 9  | 2  | 15 | 21 | 38  | 9  | LI | 3.95 | 0.0469 | 0.0363 |             | glycosyl transferases group 1 family protein                      | Y |
| Cluster_301670 | 15 | 21 | 9  | 2  | 63  | 91 | AI | 3.95 | 0.0469 | 0.0363 | <i>escU</i> | escU                                                              | Y |
| Cluster_132520 | 6  | 13 | 18 | 10 | 25  | 57 | AI | 3.63 | 0.0569 | 0.0392 |             | phage capsid scaffolding (GPO) serine peptidase family protein    | N |
| Cluster_296985 | 6  | 13 | 18 | 10 | 25  | 57 | AI | 3.63 | 0.0569 | 0.0392 |             | phage tail family protein                                         | N |
| Cluster_108754 | 17 | 9  | 7  | 14 | 71  | 39 | LI | 3.58 | 0.0585 | 0.0415 |             | phage terminase, small subunit, P27 family                        | N |
| Cluster_214595 | 15 | 7  | 9  | 16 | 63  | 30 | LI | 3.65 | 0.0561 | 0.0415 |             | phage gp6-like head-tail connector family protein                 | N |
| Cluster_222329 | 17 | 9  | 7  | 14 | 71  | 39 | LI | 3.58 | 0.0585 | 0.0415 |             | phage Terminase family protein                                    | N |
| Cluster_309171 | 9  | 16 | 15 | 7  | 38  | 70 | AI | 3.65 | 0.0561 | 0.0415 |             | outer membrane transport family protein                           | Y |
| Cluster_317314 | 17 | 9  | 7  | 14 | 71  | 39 | LI | 3.58 | 0.0585 | 0.0415 |             | phage head-tail joining family protein                            | N |
| Cluster_317316 | 15 | 7  | 9  | 16 | 63  | 30 | LI | 3.65 | 0.0561 | 0.0415 |             | putative bacteriophage protein                                    | N |
| Cluster_346859 | 8  | 15 | 16 | 8  | 33  | 65 | AI | 3.59 | 0.0582 | 0.0422 |             | fibronectin type III family protein                               | N |
| Cluster_128386 | 7  | 1  | 17 | 22 | 29  | 4  | LI | 3.52 | 0.0608 | 0.0479 |             | putative pcar                                                     | Y |
| Cluster_128751 | 7  | 1  | 17 | 22 | 29  | 4  | LI | 3.52 | 0.0608 | 0.0479 |             | HNH endonuclease family protein                                   | N |
| Cluster_167317 | 23 | 17 | 1  | 6  | 96  | 74 | LI | 2.89 | 0.0891 | 0.0479 |             | intergenic-region protein                                         | N |
| Cluster_189418 | 1  | 6  | 23 | 17 | 4   | 26 | AI | 2.89 | 0.0891 | 0.0479 |             | conserved hypothetical protein                                    | N |
| Cluster_235400 | 7  | 1  | 17 | 22 | 29  | 4  | LI | 3.52 | 0.0608 | 0.0479 | <i>umuD</i> | protein UmuD                                                      | N |
| Cluster_239025 | 7  | 1  | 17 | 22 | 29  | 4  | LI | 3.52 | 0.0608 | 0.0479 |             | phage terminase, small subunit, P27 family                        | N |
| Cluster_287883 | 7  | 1  | 17 | 22 | 29  | 4  | LI | 3.52 | 0.0608 | 0.0479 |             | conserved hypothetical protein                                    | N |
| Cluster_29580  | 7  | 1  | 17 | 22 | 29  | 4  | LI | 3.52 | 0.0608 | 0.0479 |             | phage Terminase family protein                                    | N |
| Cluster_307808 | 1  | 6  | 23 | 17 | 4   | 26 | AI | 2.89 | 0.0891 | 0.0479 |             | conserved hypothetical protein                                    | N |
| Cluster_316818 | 1  |    |    |    |     |    |    |      |        |        |             |                                                                   |   |

|                |   |   |    |    |    |    |    |      |        |        |  |                                                                       |   |
|----------------|---|---|----|----|----|----|----|------|--------|--------|--|-----------------------------------------------------------------------|---|
| Cluster_4127   | 3 | 9 | 21 | 14 | 13 | 39 | AI | 3.09 | 0.0787 | 0.0490 |  | conserved hypothetical protein                                        | N |
| Cluster_107544 | 5 | 0 | 19 | 23 | 21 | 0  | LI | 3.39 | 0.0654 | 0.0496 |  | tape measure domain protein                                           | N |
| Cluster_107548 | 5 | 0 | 19 | 23 | 21 | 0  | LI | 3.39 | 0.0654 | 0.0496 |  | conserved hypothetical protein                                        | N |
| Cluster_107738 | 5 | 0 | 19 | 23 | 21 | 0  | LI | 3.39 | 0.0654 | 0.0496 |  | putative membrane protein                                             | Y |
| Cluster_108649 | 5 | 0 | 19 | 23 | 21 | 0  | LI | 3.39 | 0.0654 | 0.0496 |  | conserved hypothetical protein                                        | N |
| Cluster_119046 | 5 | 0 | 19 | 23 | 21 | 0  | LI | 3.39 | 0.0654 | 0.0496 |  | putative tail fiber protein                                           | N |
| Cluster_127350 | 5 | 0 | 19 | 23 | 21 | 0  | LI | 3.39 | 0.0654 | 0.0496 |  | mannose-1-phosphate guanylyltransferase/mannose-6-phosphate isomerase | N |
| Cluster_163907 | 5 | 0 | 19 | 23 | 21 | 0  | LI | 3.39 | 0.0654 | 0.0496 |  | glycosyltransferase Family 4 family protein                           | N |
| Cluster_163915 | 5 | 0 | 19 | 23 | 21 | 0  | LI | 3.39 | 0.0654 | 0.0496 |  | glycosyl transferase 2 family protein                                 | N |
| Cluster_163986 | 5 | 0 | 19 | 23 | 21 | 0  | LI | 3.39 | 0.0654 | 0.0496 |  | hypothetical protein                                                  | N |
| Cluster_175608 | 5 | 0 | 19 | 23 | 21 | 0  | LI | 3.39 | 0.0654 | 0.0496 |  | degT/DnrJ/EryC1/StrS aminotransferase family protein                  | N |
| Cluster_183987 | 5 | 0 | 19 | 23 | 21 | 0  | LI | 3.39 | 0.0654 | 0.0496 |  | insA N-terminal domain protein                                        | N |
| Cluster_183988 | 5 | 0 | 19 | 23 | 21 | 0  | LI | 3.39 | 0.0654 | 0.0496 |  | putative transposase                                                  | N |
| Cluster_247403 | 5 | 0 | 19 | 23 | 21 | 0  | LI | 3.39 | 0.0654 | 0.0496 |  | glycosyl transferase 2 family protein                                 | N |
| Cluster_261602 | 5 | 0 | 19 | 23 | 21 | 0  | LI | 3.39 | 0.0654 | 0.0496 |  | conserved hypothetical protein                                        | N |
| Cluster_265998 | 5 | 0 | 19 | 23 | 21 | 0  | LI | 3.39 | 0.0654 | 0.0496 |  | conserved hypothetical protein                                        | N |
| Cluster_266287 | 5 | 0 | 19 | 23 | 21 | 0  | LI | 3.39 | 0.0654 | 0.0496 |  | hypothetical protein                                                  | Y |
| Cluster_272862 | 5 | 0 | 19 | 23 | 21 | 0  | LI | 3.39 | 0.0654 | 0.0496 |  | helix-turn-helix domain protein                                       | N |
| Cluster_276634 | 5 | 0 | 19 | 23 | 21 | 0  | LI | 3.39 | 0.0654 | 0.0496 |  | caudovirales tail fibre assembly family protein                       | N |
| Cluster_287882 | 5 | 0 | 19 | 23 | 21 | 0  | LI | 3.39 | 0.0654 | 0.0496 |  | conserved hypothetical protein                                        | N |
| Cluster_291165 | 5 | 0 | 19 | 23 | 21 | 0  | LI | 3.39 | 0.0654 | 0.0496 |  | phage integrase family protein                                        | N |
| Cluster_69486  | 5 | 0 | 19 | 23 | 21 | 0  | LI | 3.39 | 0.0654 | 0.0496 |  | conserved hypothetical protein                                        | N |
| Cluster_69487  | 5 | 0 | 19 | 23 | 21 | 0  | LI | 3.39 | 0.0654 | 0.0496 |  | conserved hypothetical protein                                        | N |
| Cluster_71994  | 5 | 0 | 19 | 23 | 21 | 0  | LI | 3.39 | 0.0654 | 0.0496 |  | glycosyl transferase 11 family protein                                | N |
| Cluster_72685  | 5 | 0 | 19 | 23 | 21 | 0  | LI | 3.39 | 0.0654 | 0.0496 |  | conserved hypothetical protein                                        | N |
| Cluster_83926  | 5 | 0 | 19 | 23 | 21 | 0  | LI | 3.39 | 0.0654 | 0.0496 |  | acetyltransferase domain protein                                      | N |
| Cluster_171515 | 0 | 4 | 24 | 19 | 0  | 17 | AI | 2.60 | 0.1067 | 0.0496 |  | putative lipoprotein                                                  | Y |
| Cluster_171516 | 0 | 4 | 24 | 19 | 0  | 17 | AI | 2.60 | 0.1067 | 0.0496 |  | methyltransferase domain protein                                      | N |
| Cluster_171517 | 0 | 4 | 24 | 19 | 0  | 17 | AI | 2.60 | 0.1067 | 0.0496 |  | beta-ketoacyl synthase, N-terminal domain protein                     | N |
| Cluster_171518 | 0 | 4 | 24 | 19 | 0  | 17 | AI | 2.60 | 0.1067 | 0.0496 |  | acyltransferase family protein                                        | Y |
| Cluster_171520 | 0 | 4 | 24 | 19 | 0  | 17 | AI | 2.60 | 0.1067 | 0.0496 |  | phosphopantetheine attachment site family protein                     | N |
| Cluster_171523 | 0 | 4 | 24 | 19 | 0  | 17 | AI | 2.60 | 0.1067 | 0.0496 |  | conserved hypothetical protein                                        | N |
| Cluster_171524 | 0 | 4 | 24 | 19 | 0  | 17 | AI | 2.60 | 0.1067 | 0.0496 |  | glycosyl transferase 2 family protein                                 | N |
| Cluster_171527 | 0 | 4 | 24 | 19 | 0  | 17 | AI | 2.60 | 0.1067 | 0.0496 |  | MMPL family protein                                                   | Y |
| Cluster_171531 | 0 | 4 | 24 | 19 | 0  | 17 | AI | 2.60 | 0.1067 | 0.0496 |  | KR domain protein                                                     | N |
| Cluster_171532 | 0 | 4 | 24 | 19 | 0  | 17 | AI | 2.60 | 0.1067 | 0.0496 |  | beta-ketoacyl synthase, N-terminal domain protein                     | N |
| Cluster_17185  | 0 | 4 | 24 | 19 | 0  | 17 | AI | 2.60 | 0.1067 | 0.0496 |  | conserved hypothetical protein                                        | Y |
| Cluster_172125 | 0 | 4 | 24 | 19 | 0  | 17 | AI | 2.60 | 0.1067 | 0.0496 |  | conserved hypothetical protein                                        | Y |
| Cluster_188256 | 0 | 4 | 24 | 19 | 0  | 17 | AI | 2.60 | 0.1067 | 0.0496 |  | conserved hypothetical protein                                        | Y |
| Cluster_203531 | 0 | 4 | 24 | 19 | 0  | 17 | AI | 2.60 | 0.1067 | 0.0496 |  | nucleoside 2-deoxyribosyltransferase family protein                   | N |
| Cluster_206025 | 0 | 4 | 24 | 19 | 0  | 17 | AI | 2.60 | 0.1067 | 0.0496 |  | phosphopantetheine attachment site family protein                     | N |
| Cluster_206027 | 0 | 4 | 24 | 19 | 0  | 17 | AI | 2.60 | 0.1067 | 0.0496 |  | putative membrane protein                                             | Y |
| Cluster_206028 | 0 | 4 | 24 | 19 | 0  | 17 | AI | 2.60 | 0.1067 | 0.0496 |  | AMP-binding enzyme family protein                                     | N |
| Cluster_206031 | 0 | 4 | 24 | 19 | 0  | 17 | AI | 2.60 | 0.1067 | 0.0496 |  | thioesterase-like superfamily protein                                 | N |
| Cluster_206032 | 0 | 4 | 24 | 19 | 0  | 17 | AI | 2.60 | 0.1067 | 0.0496 |  | outer membrane lipocarrier LoIA family protein                        | Y |
| Cluster_206034 | 0 | 4 | 24 | 19 | 0  | 17 | AI | 2.60 | 0.1067 | 0.0496 |  | conserved hypothetical protein                                        | Y |
| Cluster_206035 | 0 | 4 | 24 | 19 | 0  | 17 | AI | 2.60 | 0.1067 | 0.0496 |  | beta-ketoacyl synthase, N-terminal domain protein                     | N |
| Cluster_206036 | 0 | 4 | 24 | 19 | 0  | 17 | AI | 2.60 | 0.1067 | 0.0496 |  | fabA-like domain protein                                              | N |
| Cluster_206099 | 0 | 4 | 24 | 19 | 0  | 17 | AI | 2.60 | 0.1067 | 0.0496 |  | conserved hypothetical protein                                        | N |
| Cluster_206540 | 0 | 4 | 24 | 19 | 0  | 17 | AI | 2.60 | 0.1067 | 0.0496 |  | hNH endonuclease family protein                                       | N |
| Cluster_207740 | 0 | 4 | 24 | 19 | 0  | 17 | AI | 2.60 | 0.1067 | 0.0496 |  | caudovirales tail fibre assembly family protein                       | N |
| Cluster_297348 | 0 | 4 | 24 | 19 | 0  | 17 | AI | 2.60 | 0.1067 | 0.0496 |  | hypothetical protein                                                  | N |
| Cluster_307935 | 0 | 4 | 24 | 19 | 0  | 17 | AI | 2.60 | 0.1067 | 0.0496 |  | conserved hypothetical protein                                        | N |
| Cluster_38836  | 0 | 4 | 24 | 19 | 0  | 17 | AI | 2.60 | 0.1067 | 0.0496 |  | phage integrase family protein                                        | N |
| Cluster_8046   | 0 | 4 | 24 | 19 | 0  | 17 | AI | 2.60 | 0.1067 | 0.0496 |  | hypothetical protein                                                  | N |

## Non-lethal Symptomatic (NSI) vs. Asymptomatic (AI)

| Cluster ID     | No. of Genomes                        |                                  | Percentage of Genomes Containing Cluster |      |           | Chi-squared test |         | Fisher's exact test |        | Gene ID | Predicted Protein Function                         | Membrane or Secretion Domains |
|----------------|---------------------------------------|----------------------------------|------------------------------------------|------|-----------|------------------|---------|---------------------|--------|---------|----------------------------------------------------|-------------------------------|
|                | Present ( $\geq 0.8$ ) <sup>a,b</sup> | Absent ( $<0.8$ ) <sup>a,b</sup> | % NSI                                    | % AI | Greater % | statistic        | p-value | p-value             |        |         |                                                    |                               |
| Cluster_297448 | 7                                     | 20                               | 16                                       | 3    | 30        | 87               | AI      | 12.91               | 0.0003 | 0.0002  | conserved hypothetical protein                     | N                             |
| Cluster_54644  | 8                                     | 20                               | 15                                       | 3    | 35        | 87               | AI      | 11.04               | 0.0009 | 0.0007  | conserved hypothetical protein                     | N                             |
| Cluster_82579  | 7                                     | 18                               | 16                                       | 5    | 30        | 78               | AI      | 8.76                | 0.0031 | 0.0027  | <i>espJ</i> putative non-LEE-encoded effector EspJ | N                             |
| Cluster_34159  | 12                                    | 2                                | 11                                       | 21   | 52        | 9                | NSI     | 8.32                | 0.0039 | 0.0031  | conserved hypothetical protein                     | N                             |
| Cluster_116275 | 5                                     | 15                               | 18                                       | 8    | 22        | 65               | AI      | 7.17                | 0.0074 | 0.0067  | espF repeat family protein                         | Y                             |
| Cluster_183342 | 7                                     | 17                               | 16                                       | 6    | 30        | 74               | AI      | 7.06                | 0.0079 | 0.0072  | hypothetical protein                               | Y                             |
| Cluster_267235 | 11                                    | 2                                | 12                                       | 21   | 48        | 9                | NSI     | 6.86                | 0.0088 | 0.0074  | hypothetical protein                               | Y                             |
| Cluster_132984 | 1                                     | 9                                | 22                                       | 14   | 4         | 39               | AI      | 6.26                | 0.0123 | 0.0098  | traP family protein                                | Y                             |
| Cluster_337159 | 13                                    | 4                                | 10                                       | 19   | 57        | 17               | NSI     | 5.97                | 0.0145 | 0.0134  | conserved hypothetical protein                     | N                             |
| Cluster_74298  | 13                                    | 4                                | 10                                       | 19   | 57        | 17               | NSI     | 5.97                | 0.0145 | 0.0134  | traP family protein                                | Y                             |
| Cluster_307754 | 16                                    | 7                                | 7                                        | 16   | 70        | 30               | NSI     | 5.57                | 0.0183 | 0.0174  | regulatory protein cro                             | N                             |
| Cluster_103192 | 6                                     | 0                                | 17                                       | 23   | 26        | 0                | NSI     | 4.79                | 0.0286 | 0.0216  | putative phage protein                             | N                             |
| Cluster_147543 | 6                                     | 0                                | 17                                       | 23   | 26        | 0                | NSI     | 4.79                | 0.0286 | 0.0216  | putative yf4A                                      | Y                             |
| Cluster_167315 | 23                                    | 17                               | 0                                        | 6    | 100       | 74               | NSI     | 4.79                | 0.0286 | 0.0216  | conserved hypothetical protein                     | N                             |
| Cluster_167317 | 23                                    | 17                               | 0                                        | 6    | 100       | 74               | NSI     | 4.79                | 0.0286 | 0.0216  | intergenic-region protein                          | N                             |
| Cluster_189418 | 0                                     | 6                                | 23                                       | 17   | 0         | 26               | AI      | 4.79                | 0.0286 | 0.0216  | conserved hypothetical protein                     | N                             |
| Cluster_9132   | 0                                     | 6                                | 23                                       | 17   | 0         | 26               | AI      | 4.79                | 0.0286 | 0.0216  | dini-like family protein                           | N                             |
| Cluster_128485 | 8                                     | 1                                | 15                                       | 22   | 35        | 4                | NSI     | 4.97                | 0.0257 | 0.0220  | conserved hypothetical protein                     | Y                             |
| Cluster_147776 | 3                                     | 11                               | 20                                       | 12   | 13        | 48               | AI      | 5.03                | 0.0249 | 0.0230  | conserved hypothetical protein                     | N                             |
| Cluster_232396 | 3                                     | 11                               | 20                                       | 12   | 13        | 48               | AI      | 5.03                | 0.0249 | 0.0230  | putative dNA-binding helix-turn-helix protein      | N                             |
| Cluster_169965 | 5                                     | 13                               | 18                                       | 10   | 22        | 57               | AI      | 4.47                | 0.0345 | 0.0331  | ogr/Delta-like zinc finger family protein          | N                             |
| Cluster_200452 | 5                                     | 13                               | 18                                       | 10   | 22        | 57               | AI      | 4.47                | 0.0345 | 0.0331  | putative prophage protein                          | N                             |
| Cluster_200454 | 5                                     | 13                               | 18                                       | 10   | 22        | 57               | AI      | 4.47                | 0.0345 | 0.0331  | putative phage immunity repressor protein          | N                             |
| Cluster_271578 | 5                                     | 13                               | 18                                       | 10   | 22        | 57               | AI      | 4.47                | 0.0345 | 0.0331  | conserved hypothetical protein                     | N                             |
| Cluster_302692 | 13                                    | 5                                | 10                                       | 18   | 57        | 22               | NSI     | 4.47                | 0.0345 | 0.0331  | hypothetical protein                               | N                             |
| Cluster_316955 | 5                                     | 13                               | 18                                       | 10   | 22        | 57               | AI      | 4.47                | 0.0345 | 0.0331  | helix-turn-helix domain protein                    | N                             |
| Cluster_342331 | 13                                    | 5                                | 10                                       | 18   | 57        | 22               | NSI     | 4.47                | 0.0345 | 0.0331  | putative bacteriophage protein                     | N                             |
| Cluster_62281  | 13                                    | 5                                | 10                                       | 18   | 57        | 22               | NSI     | 4.47                | 0.0345 | 0.0331  | putative membrane protein                          | Y                             |
| Cluster_63459  | 5                                     | 13                               | 18                                       | 10   | 22        | 57               | AI      | 4.47                | 0.0345 | 0.0331  | putative derepression protein                      | N                             |
| Cluster_84849  | 13                                    | 5                                | 10                                       | 18   | 57        | 22               | NSI     | 4.47                | 0.0345 | 0.0331  | conserved hypothetical protein                     | N                             |
| Cluster_11587  | 2                                     | 9                                | 21                                       | 14   | 9         | 39               | AI      | 4.30                | 0.0381 | 0.0351  | transposase family protein                         | Y                             |
| Cluster_183593 | 9                                     | 2                                | 14                                       | 21   | 39        | 9                | NSI     | 4.30                | 0.0381 | 0.0351  | conserved hypothetical protein                     | N                             |
| Cluster_227577 | 2                                     | 9                                | 21                                       | 14   | 9         | 39               | AI      | 4.30                | 0.0381 | 0.0351  | single-stranded DNA-binding protein                | N                             |
| Cluster_262069 | 9                                     | 2                                | 14                                       | 21   | 39        | 9                | NSI     | 4.30                | 0.0381 | 0.0351  | istB-like ATP binding family protein               | N                             |
| Cluster_289981 | 9                                     | 2                                | 14                                       | 21   | 39        | 9                | NSI     | 4.30                | 0.0381 | 0.0351  | integrase core domain protein                      | N                             |
| Cluster_64291  | 21                                    | 14                               | 2                                        | 9    | 91        | 61               | NSI     | 4.30                | 0.0381 | 0.0351  | <i>folP</i> dihydropterolate synthase              | N                             |



|                |    |    |    |    |     |    |     |      |        |        |                                                             |   |
|----------------|----|----|----|----|-----|----|-----|------|--------|--------|-------------------------------------------------------------|---|
| Cluster_281770 | 14 | 6  | 9  | 17 | 61  | 26 | NSI | 4.33 | 0.0373 | 0.0361 | putative replication protein                                | N |
| Cluster_346882 | 14 | 6  | 9  | 17 | 61  | 26 | NSI | 4.33 | 0.0373 | 0.0361 | conserved hypothetical protein                              | N |
| Cluster_309171 | 8  | 16 | 15 | 7  | 35  | 70 | AI  | 4.27 | 0.0388 | 0.0377 | outer membrane transport family protein                     | Y |
| Cluster_322029 | 15 | 7  | 8  | 16 | 65  | 30 | NSI | 4.27 | 0.0388 | 0.0377 | hypothetical protein                                        | N |
| Cluster_327168 | 15 | 7  | 8  | 16 | 65  | 30 | NSI | 4.27 | 0.0388 | 0.0377 | helix-turn-helix domain protein                             | N |
| Cluster_147010 | 1  | 7  | 22 | 16 | 4   | 30 | AI  | 3.78 | 0.0518 | 0.0470 | MULE transposase domain protein                             | N |
| Cluster_147193 | 1  | 7  | 22 | 16 | 4   | 30 | AI  | 3.78 | 0.0518 | 0.0470 | resolvase, N terminal domain protein                        | N |
| Cluster_297043 | 1  | 7  | 22 | 16 | 4   | 30 | AI  | 3.78 | 0.0518 | 0.0470 | hypothetical protein                                        | N |
| Cluster_312558 | 1  | 7  | 22 | 16 | 4   | 30 | AI  | 3.78 | 0.0518 | 0.0470 | conserved hypothetical protein                              | Y |
| Cluster_312602 | 1  | 7  | 22 | 16 | 4   | 30 | AI  | 3.78 | 0.0518 | 0.0470 | HNH endonuclease family protein                             | N |
| Cluster_316814 | 1  | 7  | 22 | 16 | 4   | 30 | AI  | 3.78 | 0.0518 | 0.0470 | AAA domain protein                                          | N |
| Cluster_320753 | 1  | 7  | 22 | 16 | 4   | 30 | AI  | 3.78 | 0.0518 | 0.0470 | conserved hypothetical protein                              | N |
| Cluster_59342  | 7  | 1  | 16 | 22 | 30  | 4  | NSI | 3.78 | 0.0518 | 0.0470 | conserved hypothetical protein                              | N |
| Cluster_69383  | 22 | 16 | 1  | 7  | 96  | 70 | NSI | 3.78 | 0.0518 | 0.0470 | prophage minor tail Z family protein                        | N |
| Cluster_94384  | 22 | 16 | 1  | 7  | 96  | 70 | NSI | 3.78 | 0.0518 | 0.0470 | transposase, Mutator family protein                         | N |
| Cluster_102885 | 20 | 13 | 3  | 10 | 87  | 57 | NSI | 3.86 | 0.0494 | 0.0472 | integrase core domain protein                               | N |
| Cluster_24422  | 3  | 10 | 20 | 13 | 13  | 43 | AI  | 3.86 | 0.0494 | 0.0472 | conserved hypothetical protein                              | N |
| Cluster_168916 | 0  | 5  | 23 | 18 | 0   | 22 | AI  | 3.59 | 0.0581 | 0.0491 | nucleoside transporter family protein                       | Y |
| Cluster_189417 | 0  | 5  | 23 | 18 | 0   | 22 | AI  | 3.59 | 0.0581 | 0.0491 | acetyltransferase family protein                            | N |
| Cluster_191408 | 0  | 5  | 23 | 18 | 0   | 22 | AI  | 3.59 | 0.0581 | 0.0491 | conserved hypothetical protein                              | N |
| Cluster_191933 | 0  | 5  | 23 | 18 | 0   | 22 | AI  | 3.59 | 0.0581 | 0.0491 | 3-oxoacid CoA-transferase, B subunit                        | N |
| Cluster_191937 | 0  | 5  | 23 | 18 | 0   | 22 | AI  | 3.59 | 0.0581 | 0.0491 | 3-hydroxybutyrate dehydrogenase family protein              | Y |
| Cluster_207859 | 0  | 5  | 23 | 18 | 0   | 22 | AI  | 3.59 | 0.0581 | 0.0491 | conserved hypothetical protein                              | N |
| Cluster_322942 | 0  | 5  | 23 | 18 | 0   | 22 | AI  | 3.59 | 0.0581 | 0.0491 | conserved hypothetical protein                              | N |
| Cluster_51720  | 0  | 5  | 23 | 18 | 0   | 22 | AI  | 3.59 | 0.0581 | 0.0491 | 3-oxoacid CoA-transferase, A subunit                        | N |
| Cluster_51724  | 0  | 5  | 23 | 18 | 0   | 22 | AI  | 3.59 | 0.0581 | 0.0491 | citrate transporter family protein                          | Y |
| Cluster_76780  | 0  | 5  | 23 | 18 | 0   | 22 | AI  | 3.59 | 0.0581 | 0.0491 | lysR substrate binding domain protein                       | Y |
| Cluster_76783  | 0  | 5  | 23 | 18 | 0   | 22 | AI  | 3.59 | 0.0581 | 0.0491 | acetyl-CoA C-acetyltransferase family protein               | N |
| Cluster_7789   | 0  | 5  | 23 | 18 | 0   | 22 | AI  | 3.59 | 0.0581 | 0.0491 | 3-hydroxyacyl-CoA dehydrogenase, NAD binding domain protein | N |
| Cluster_79228  | 0  | 5  | 23 | 18 | 0   | 22 | AI  | 3.59 | 0.0581 | 0.0491 | conserved hypothetical protein                              | N |
| Cluster_266659 | 23 | 18 | 0  | 5  | 100 | 78 | NSI | 3.59 | 0.0581 | 0.0491 | <i>repA</i>                                                 | N |
|                |    |    |    |    |     |    |     |      |        |        | incFII family plasmid replication initiator RepA            | N |

<sup>a</sup>Genes were grouped into gene clusters using an "inclusive" clustering threshold of ≥80% nucleotide identity.

<sup>b</sup>Gene clusters identified as "present" have a TBLASTN LS-BSR ≥0.8, while those that are "absent" have a TBLASTN LS-BSR <0.8.

<sup>c</sup>Clinical outcomes are classified as lethal (L), non-lethal symptomatic (NSI), and asymptomatic (AI).



**Table S7.** Genes identified by LS-BSR that are significantly correlated with one clinical outcome over another for the 61 typical EPEC genomes analyzed using an inclusive clustering threshold

| Lethal (LI) vs. Non-lethal Symptomatic (NSI) |                                       |                                   |    |                                          |       |           |                  |         |                     |         |                                                                                    |                                                                           |   |
|----------------------------------------------|---------------------------------------|-----------------------------------|----|------------------------------------------|-------|-----------|------------------|---------|---------------------|---------|------------------------------------------------------------------------------------|---------------------------------------------------------------------------|---|
| Cluster ID                                   | No. of Genomes                        |                                   |    | Percentage of Genomes Containing Cluster |       |           | Chi-squared test |         | Fisher's exact test | Gene ID | Predicted Protein Function                                                         | Membrane or Secretion Domains                                             |   |
|                                              | Present ( $\geq 0.8$ ) <sup>a,b</sup> | Absent ( $< 0.8$ ) <sup>a,b</sup> |    | % LI                                     | % NSI | Greater % | statistic        | p-value | p-value             |         |                                                                                    |                                                                           |   |
| Cluster_121796                               | 0                                     | 4                                 | 24 | 16                                       | 0     | 20        | NSI              | 2.94    | 0.0864              | 0.0402  | caudovirales tail fibre assembly family protein                                    | N                                                                         |   |
| Cluster_121973                               | 0                                     | 4                                 | 24 | 16                                       | 0     | 20        | NSI              | 2.60    | 0.1067              | 0.0496  | conserved hypothetical protein                                                     | N                                                                         |   |
| Cluster_163539                               | 0                                     | 4                                 | 24 | 16                                       | 0     | 20        | NSI              | 2.76    | 0.0964              | 0.0448  | hypothetical protein                                                               | N                                                                         |   |
| Cluster_175606                               | 6                                     | 0                                 | 18 | 20                                       | 25    | 0         | LI               | 3.41    | 0.0649              | 0.0292  | <i>fdtA</i>                                                                        | dTDP-6-deoxy-3,4-keto-hexulose isomerase                                  | N |
| Cluster_216712                               | 1                                     | 6                                 | 23 | 14                                       | 4     | 30        | NSI              | 2.89    | 0.0891              | 0.0479  |                                                                                    | putative membrane protein                                                 | Y |
| Cluster_222636                               | 6                                     | 0                                 | 18 | 20                                       | 25    | 0         | LI               | 3.41    | 0.0649              | 0.0292  | <i>rbA</i>                                                                         | glucose-1-phosphate thymidyltransferase                                   | N |
| Cluster_99052                                | 1                                     | 6                                 | 23 | 14                                       | 4     | 30        | NSI              | 2.89    | 0.0891              | 0.0479  |                                                                                    | conserved hypothetical protein                                            | Y |
| Lethal (LI) vs. Asymptomatic (AI)            |                                       |                                   |    |                                          |       |           |                  |         |                     |         |                                                                                    |                                                                           |   |
| Cluster ID                                   | No. of Genomes                        |                                   |    | Percentage of Genomes Containing Cluster |       |           | Chi-squared test |         | Fisher's exact test | Gene ID | Predicted Protein Function                                                         | Membrane or Secretion Domains                                             |   |
|                                              | Present ( $\geq 0.8$ ) <sup>a,b</sup> | Absent ( $< 0.8$ ) <sup>a,b</sup> |    | % LI                                     | % AI  | Greater % | statistic        | p-value | p-value             |         |                                                                                    |                                                                           |   |
| Cluster_106122                               | 7                                     | 0                                 | 17 | 17                                       | 29    | 0         | LI               | 4.10    | 0.0430              | 0.0295  | conserved hypothetical protein                                                     | N                                                                         |   |
| Cluster_106126                               | 6                                     | 0                                 | 18 | 17                                       | 25    | 0         | LI               | 3.18    | 0.0746              | 0.0327  | conserved hypothetical protein                                                     | N                                                                         |   |
| Cluster_107351                               | 11                                    | 1                                 | 13 | 16                                       | 46    | 6         | LI               | 5.86    | 0.0155              | 0.0064  | conserved hypothetical protein                                                     | N                                                                         |   |
| Cluster_107804                               | 20                                    | 9                                 | 4  | 8                                        | 83    | 53        | LI               | 3.09    | 0.0786              | 0.0454  | methyltransferase domain protein                                                   | N                                                                         |   |
| Cluster_108754                               | 17                                    | 6                                 | 7  | 11                                       | 71    | 35        | LI               | 3.76    | 0.0524              | 0.0308  | phage terminase, small subunit, P27 family                                         | N                                                                         |   |
| Cluster_112366                               | 4                                     | 8                                 | 20 | 9                                        | 17    | 47        | AI               | 3.09    | 0.0786              | 0.0454  | mu-like prophage FluMu gp41 family protein                                         | N                                                                         |   |
| Cluster_115111                               | 4                                     | 8                                 | 20 | 9                                        | 17    | 47        | AI               | 3.09    | 0.0786              | 0.0454  | putative exported protein                                                          | Y                                                                         |   |
| Cluster_115298                               | 7                                     | 0                                 | 17 | 17                                       | 29    | 0         | LI               | 4.10    | 0.0430              | 0.0295  | conserved hypothetical protein                                                     | N                                                                         |   |
| Cluster_115308                               | 6                                     | 0                                 | 18 | 17                                       | 25    | 0         | LI               | 3.18    | 0.0746              | 0.0327  | helix-turn-helix domain protein                                                    | Y                                                                         |   |
| Cluster_11587                                | 4                                     | 9                                 | 20 | 8                                        | 17    | 53        | AI               | 4.49    | 0.0341              | 0.0198  | transposase family protein                                                         | Y                                                                         |   |
| Cluster_127453                               | 6                                     | 0                                 | 18 | 17                                       | 25    | 0         | LI               | 3.18    | 0.0746              | 0.0327  | conserved hypothetical protein                                                     | N                                                                         |   |
| Cluster_13383                                | 9                                     | 1                                 | 15 | 16                                       | 38    | 6         | LI               | 3.82    | 0.0508              | 0.0281  | conserved hypothetical protein                                                     | N                                                                         |   |
| Cluster_139135                               | 6                                     | 0                                 | 18 | 17                                       | 25    | 0         | LI               | 3.18    | 0.0746              | 0.0327  | putative pyridoxamine 5-phosphate-dependent dehydrase                              | N                                                                         |   |
| Cluster_14414                                | 10                                    | 1                                 | 14 | 16                                       | 42    | 6         | LI               | 4.80    | 0.0285              | 0.0136  | conserved hypothetical protein                                                     | N                                                                         |   |
| Cluster_14627                                | 5                                     | 11                                | 19 | 6                                        | 21    | 65        | AI               | 6.31    | 0.0120              | 0.0086  | cysteine protease, YopT-type domain protein                                        | N                                                                         |   |
| Cluster_147543                               | 8                                     | 0                                 | 16 | 17                                       | 33    | 0         | LI               | 5.08    | 0.0242              | 0.0128  | putative yfdA                                                                      | Y                                                                         |   |
| Cluster_151023                               | 6                                     | 11                                | 18 | 6                                        | 25    | 65        | AI               | 4.93    | 0.0264              | 0.0230  | conserved hypothetical protein                                                     | Y                                                                         |   |
| Cluster_152085                               | 6                                     | 0                                 | 18 | 17                                       | 25    | 0         | LI               | 3.18    | 0.0746              | 0.0327  | conserved hypothetical protein                                                     | N                                                                         |   |
| Cluster_153090                               | 2                                     | 6                                 | 22 | 11                                       | 8     | 35        | AI               | 3.05    | 0.0808              | 0.0486  | type II intron maturase family protein                                             | N                                                                         |   |
| Cluster_166190                               | 7                                     | 0                                 | 17 | 17                                       | 29    | 0         | LI               | 4.10    | 0.0430              | 0.0295  | phage integrase family protein                                                     | N                                                                         |   |
| Cluster_167315                               | 22                                    | 11                                | 2  | 6                                        | 92    | 65        | LI               | 3.05    | 0.0808              | 0.0486  | conserved hypothetical protein                                                     | N                                                                         |   |
| Cluster_167317                               | 23                                    | 11                                | 1  | 6                                        | 96    | 65        | LI               | 4.79    | 0.0286              | 0.0141  | intergenic-region protein                                                          | N                                                                         |   |
| Cluster_168916                               | 0                                     | 5                                 | 24 | 12                                       | 0     | 29        | AI               | 5.53    | 0.0187              | 0.0083  | nucleoside transporter family protein                                              | Y                                                                         |   |
| Cluster_169965                               | 4                                     | 10                                | 20 | 7                                        | 17    | 59        | AI               | 6.10    | 0.0135              | 0.0079  | ogr/Delta-like zinc finger family protein                                          | N                                                                         |   |
| Cluster_172125                               | 0                                     | 4                                 | 24 | 13                                       | 0     | 24        | AI               | 3.87    | 0.0491              | 0.0235  | conserved hypothetical protein                                                     | Y                                                                         |   |
| Cluster_174672                               | 6                                     | 0                                 | 18 | 17                                       | 25    | 0         | LI               | 3.18    | 0.0746              | 0.0327  | conserved hypothetical protein                                                     | Y                                                                         |   |
| Cluster_175128                               | 6                                     | 0                                 | 18 | 17                                       | 25    | 0         | LI               | 3.18    | 0.0746              | 0.0327  | binding-protein-dependent transport system inner membrane component family protein | Y                                                                         |   |
| Cluster_175131                               | 6                                     | 0                                 | 18 | 17                                       | 25    | 0         | LI               | 3.18    | 0.0746              | 0.0327  | bacterial transferase hexapeptide family protein                                   | N                                                                         |   |
| Cluster_175132                               | 6                                     | 0                                 | 18 | 17                                       | 25    | 0         | LI               | 3.18    | 0.0746              | 0.0327  | putative glycosidase                                                               | Y                                                                         |   |
| Cluster_175134                               | 6                                     | 0                                 | 18 | 17                                       | 25    | 0         | LI               | 3.18    | 0.0746              | 0.0327  | archaeal transcriptional regulator TrmB family protein                             | N                                                                         |   |
| Cluster_175606                               | 6                                     | 0                                 | 18 | 17                                       | 25    | 0         | LI               | 3.18    | 0.0746              | 0.0327  | <i>fdtA</i>                                                                        | dTDP-6-deoxy-3,4-keto-hexulose isomerase                                  | N |
| Cluster_176094                               | 6                                     | 0                                 | 18 | 17                                       | 25    | 0         | LI               | 3.18    | 0.0746              | 0.0327  |                                                                                    | NIF3 family protein                                                       | N |
| Cluster_176098                               | 6                                     | 0                                 | 18 | 17                                       | 25    | 0         | LI               | 3.18    | 0.0746              | 0.0327  |                                                                                    | alpha amylase, catalytic domain protein                                   | N |
| Cluster_176426                               | 6                                     | 0                                 | 18 | 17                                       | 25    | 0         | LI               | 3.18    | 0.0746              | 0.0327  |                                                                                    | conserved hypothetical protein                                            | N |
| Cluster_176531                               | 6                                     | 0                                 | 18 | 17                                       | 25    | 0         | LI               | 3.18    | 0.0746              | 0.0327  |                                                                                    | hypothetical protein                                                      | N |
| Cluster_177188                               | 11                                    | 2                                 | 13 | 15                                       | 46    | 12        | LI               | 3.88    | 0.0490              | 0.0391  |                                                                                    | phage integrase family protein                                            | N |
| Cluster_178309                               | 22                                    | 9                                 | 2  | 8                                        | 92    | 53        | LI               | 6.13    | 0.0133              | 0.0083  |                                                                                    | conserved hypothetical protein                                            | N |
| Cluster_182012                               | 6                                     | 0                                 | 18 | 17                                       | 25    | 0         | LI               | 3.18    | 0.0746              | 0.0327  |                                                                                    | phospholipase_D-nuclease N-terminal family protein                        | Y |
| Cluster_183140                               | 9                                     | 1                                 | 15 | 16                                       | 38    | 6         | LI               | 3.82    | 0.0508              | 0.0281  |                                                                                    | putative escherichia coli chi7122 genomic chromosome, chi7122             | Y |
| Cluster_183593                               | 11                                    | 2                                 | 13 | 15                                       | 46    | 12        | LI               | 3.88    | 0.0490              | 0.0391  |                                                                                    | conserved hypothetical protein                                            | N |
| Cluster_183787                               | 6                                     | 0                                 | 18 | 17                                       | 25    | 0         | LI               | 3.18    | 0.0746              | 0.0327  |                                                                                    | 3-octaprenyl-4-hydroxybenzoate carboxylase family protein                 | N |
| Cluster_200452                               | 4                                     | 10                                | 20 | 7                                        | 17    | 59        | AI               | 6.10    | 0.0135              | 0.0079  |                                                                                    | putative prophage protein                                                 | N |
| Cluster_200454                               | 4                                     | 10                                | 20 | 7                                        | 17    | 59        | AI               | 6.10    | 0.0135              | 0.0079  |                                                                                    | putative phage immunity repressor protein                                 | N |
| Cluster_203531                               | 0                                     | 4                                 | 24 | 13                                       | 0     | 24        | AI               | 3.87    | 0.0491              | 0.0235  |                                                                                    | nucleoside 2-deoxyribosyltransferase family protein                       | N |
| Cluster_206540                               | 0                                     | 4                                 | 24 | 13                                       | 0     | 24        | AI               | 3.87    | 0.0491              | 0.0235  |                                                                                    | hNH endonuclease family protein                                           | N |
| Cluster_207773                               | 2                                     | 6                                 | 22 | 11                                       | 8     | 35        | AI               | 3.05    | 0.0808              | 0.0486  |                                                                                    | collagen triple helix repeat family protein                               | N |
| Cluster_209146                               | 9                                     | 1                                 | 15 | 16                                       | 38    | 6         | LI               | 3.82    | 0.0508              | 0.0281  |                                                                                    | shET2 enterotoxin, N-terminal region family protein                       | N |
| Cluster_214595                               | 15                                    | 4                                 | 9  | 13                                       | 63    | 24        | LI               | 4.61    | 0.0318              | 0.0252  |                                                                                    | phage gp6-like head-tail connector family protein                         | N |
| Cluster_221116                               | 7                                     | 0                                 | 17 | 17                                       | 29    | 0         | LI               | 4.10    | 0.0430              | 0.0295  |                                                                                    | hypothetical protein                                                      | N |
| Cluster_221922                               | 6                                     | 0                                 | 18 | 17                                       | 25    | 0         | LI               | 3.18    | 0.0746              | 0.0327  |                                                                                    | glycosyl transferase family 2 domain protein                              | N |
| Cluster_221927                               | 7                                     | 0                                 | 17 | 17                                       | 29    | 0         | LI               | 4.10    | 0.0430              | 0.0295  |                                                                                    | phage Tail Collar domain protein                                          | Y |
| Cluster_222329                               | 17                                    | 6                                 | 7  | 11                                       | 71    | 35        | LI               | 3.76    | 0.0524              | 0.0308  |                                                                                    | phage Terminase family protein                                            | N |
| Cluster_222331                               | 16                                    | 4                                 | 8  | 13                                       | 67    | 24        | LI               | 5.79    | 0.0162              | 0.0109  |                                                                                    | phage portal protein, HK97 family                                         | N |
| Cluster_222333                               | 17                                    | 4                                 | 7  | 13                                       | 71    | 24        | LI               | 7.12    | 0.0076              | 0.0044  |                                                                                    | phage major capsid protein, HK97 family                                   | N |
| Cluster_222426                               | 8                                     | 0                                 | 16 | 17                                       | 33    | 0         | LI               | 5.08    | 0.0242              | 0.0128  |                                                                                    | putative membrane protein                                                 | Y |
| Cluster_222636                               | 6                                     | 0                                 | 18 | 17                                       | 25    | 0         | LI               | 3.18    | 0.0746              | 0.0327  | <i>rbA</i>                                                                         | glucose-1-phosphate thymidyltransferase                                   | N |
| Cluster_225859                               | 4                                     | 9                                 | 20 | 8                                        | 17    | 53        | AI               | 4.49    | 0.0341              | 0.0198  |                                                                                    | putative glyco3, capsid size determination protein Sid                    | N |
| Cluster_225861                               | 3                                     | 8                                 | 21 | 9                                        | 13    | 47        | AI               | 4.42    | 0.0355              | 0.0292  | <i>psu</i>                                                                         | polarity suppression protein                                              | N |
| Cluster_227359                               | 9                                     | 1                                 | 15 | 16                                       | 38    | 6         | LI               | 3.82    | 0.0508              | 0.0281  |                                                                                    | conserved hypothetical protein                                            | N |
| Cluster_227360                               | 9                                     | 1                                 | 15 | 16                                       | 38    | 6         | LI               | 3.82    | 0.0508              | 0.0281  |                                                                                    | putative membrane protein                                                 | Y |
| Cluster_232949                               | 7                                     | 0                                 | 17 | 17                                       | 29    | 0         | LI               | 4.10    | 0.0430              | 0.0295  |                                                                                    | P22AR C-terminal domain protein                                           | N |
| Cluster_236134                               | 16                                    | 5                                 | 8  | 12                                       | 67    | 29        | LI               | 4.14    | 0.0419              | 0.0278  | <i>dhfrI</i>                                                                       | dihydrofolate reductase type 1                                            | N |
| Cluster_237277                               | 12                                    | 2                                 | 12 | 15                                       | 50    | 12        | LI               | 4.88    | 0.0272              | 0.0183  |                                                                                    | conserved hypothetical protein                                            | N |
| Cluster_237298                               | 6                                     | 0                                 | 18 | 17                                       | 25    | 0         | LI               | 3.18    | 0.0746              | 0.0327  |                                                                                    | conserved hypothetical protein                                            | N |
| Cluster_237299                               | 6                                     | 0                                 | 18 | 17                                       | 25    | 0         | LI               | 3.18    | 0.0746              | 0.0327  |                                                                                    | conserved hypothetical protein                                            | N |
| Cluster_23758                                | 6                                     | 0                                 | 18 | 17                                       | 25    | 0         | LI               | 3.18    | 0.0746              | 0.0327  |                                                                                    | bacterial extracellular solute-binding family protein                     | Y |
| Cluster_240829                               | 7                                     | 0                                 | 17 | 17                                       | 29    | 0         | LI               | 4.10    | 0.0430              | 0.0295  |                                                                                    | hypothetical protein                                                      | N |
| Cluster_247401                               | 6                                     | 0                                 | 18 | 17                                       | 25    | 0         | LI               | 3.18    | 0.0746              | 0.0327  |                                                                                    | polysaccharide biosynthesis/export family protein                         | N |
| Cluster_251045                               | 8                                     | 12                                | 16 | 5                                        | 33    | 71        | AI               | 4.14    | 0.0419              | 0.0278  |                                                                                    | phage tail tape measure protein, TP901 family, core region                | Y |
| Cluster_252971                               | 20                                    | 7                                 | 4  | 10                                       | 83    | 41        | LI               | 6.10    | 0.0135              | 0.0079  |                                                                                    | HNH endonuclease family protein                                           | N |
| Cluster_25983                                | 6                                     | 0                                 | 18 | 17                                       | 25    | 0         | LI               | 3.18    | 0.0746              | 0.0327  |                                                                                    | bacteriophage replication gene A family protein                           | Y |
| Cluster_260984                               | 13                                    | 2                                 | 11 | 15                                       | 54    | 12        | LI               | 5.99    | 0.0144              | 0.0082  | <i>traN</i>                                                                        | type-F conjugative transfer system mating-pair stabilization protein TraN | N |
| Cluster_261817                               | 7                                     | 0                                 | 17 | 17                                       | 29    | 0         | LI               | 4.10    | 0.0430              | 0.0295  |                                                                                    | putative predicted protein                                                | N |
| Cluster_262069                               | 12                                    | 2                                 | 12 | 15                                       | 50    | 12        | LI               | 4.88    | 0.0272              | 0.0183  |                                                                                    | isiB-like ATP binding family protein                                      | N |
| Cluster_262291                               | 17                                    | 17                                | 7  | 0                                        | 71    | 100       | AI               | 4.10    | 0.0430              | 0.0295  |                                                                                    | type III secretion, HrpO family protein                                   | Y |
| Cluster_263620                               | 9                                     | 1                                 | 15 | 16                                       | 38    | 6         | LI               | 3.82    | 0.0508              | 0.0281  |                                                                                    | transposase DDE domain protein                                            | N |
| Cluster_263945                               | 7                                     | 0                                 | 17 | 17                                       | 29    | 0         | LI               | 4.10    | 0.0430              | 0.0295  |                                                                                    | conserved hypothetical protein                                            | N |
| Cluster_267235                               | 12                                    | 2                                 | 12 | 15                                       | 50    | 12        | LI               | 4.88    | 0.0272              | 0.0183  |                                                                                    | hypothetical protein                                                      | N |
| Cluster_271134                               | 2                                     | 6                                 | 22 | 11                                       | 8     | 35        | AI               | 3.05    | 0.0808              | 0.0486  |                                                                                    | outer membrane autotransporter barrel domain protein                      | Y |
| Cluster_271578                               | 4                                     | 10                                | 20 | 7                                        | 17    | 59        | AI               | 6.10    | 0.0135              | 0.0079  |                                                                                    | conserved hypothetical protein                                            | N |
| Cluster_276264                               | 11                                    | 2                                 | 13 | 15                                       | 46    | 12        | LI               | 3.88    | 0.0490              | 0.0391  |                                                                                    | replication regulatory RepB family protein                                | N |
| Cluster_289981                               | 12                                    | 2                                 | 12 | 15                                       | 50    | 12        | LI               | 4.88    | 0.0272              | 0.0183  |                                                                                    | integrase core domain protein                                             | N |
| Cluster_291294                               | 6                                     | 0                                 | 18 | 17                                       | 25    | 0         | LI               | 3.18    | 0.0746              | 0.0327  |                                                                                    | putative pyridoxamine 5-phosphate-dependent dehydrase                     | Y |
| Cluster_296985                               | 6                                     | 11                                | 18 | 6                                        | 25    | 65        | AI               | 4.93    | 0.0264              | 0.0230  |                                                                                    | phage tail family protein                                                 | N |

|                |    |    |    |    |    |     |      |        |        |        |                                 |                                                                                    |   |
|----------------|----|----|----|----|----|-----|------|--------|--------|--------|---------------------------------|------------------------------------------------------------------------------------|---|
| Cluster_297348 | 0  | 4  | 24 | 13 | 0  | 24  | AI   | 3.87   | 0.0491 | 0.0235 |                                 | hypothetical protein                                                               | N |
| Cluster_297449 | 2  | 8  | 22 | 9  | 8  | 47  | AI   | 6.13   | 0.0133 | 0.0083 |                                 | conserved hypothetical protein                                                     | N |
| Cluster_307808 | 1  | 6  | 23 | 11 | 4  | 35  | AI   | 4.79   | 0.0286 | 0.0141 |                                 | conserved hypothetical protein                                                     | N |
| Cluster_307935 | 0  | 4  | 24 | 13 | 0  | 24  | AI   | 3.87   | 0.0491 | 0.0235 |                                 | conserved hypothetical protein                                                     | N |
| Cluster_309171 | 9  | 13 | 15 | 4  | 38 | 76  | AI   | 4.61   | 0.0318 | 0.0252 |                                 | outer membrane transport family protein                                            | Y |
| Cluster_312794 | 11 | 1  | 13 | 16 | 46 | 6   | LI   | 5.86   | 0.0155 | 0.0064 |                                 | transposase DDE domain protein                                                     | N |
| Cluster_314972 | 6  | 0  | 18 | 17 | 25 | 0   | LI   | 3.18   | 0.0746 | 0.0327 |                                 | conserved hypothetical protein                                                     | N |
| Cluster_315365 | 6  | 0  | 18 | 17 | 25 | 0   | LI   | 3.18   | 0.0746 | 0.0327 |                                 | ABC transporter family protein                                                     | Y |
| Cluster_315371 | 6  | 0  | 18 | 17 | 25 | 0   | LI   | 3.18   | 0.0746 | 0.0327 |                                 | binding-protein-dependent transport system inner membrane component family protein | Y |
| Cluster_315372 | 6  | 0  | 18 | 17 | 25 | 0   | LI   | 3.18   | 0.0746 | 0.0327 |                                 | alpha amylase, N-terminal ig-like domain protein                                   | N |
| Cluster_316214 | 6  | 0  | 18 | 17 | 25 | 0   | LI   | 3.18   | 0.0746 | 0.0327 |                                 | tatD related DNase family protein                                                  | N |
| Cluster_316955 | 4  | 10 | 20 | 7  | 17 | 59  | AI   | 6.10   | 0.0135 | 0.0079 |                                 | helix-turn-helix domain protein                                                    | N |
| Cluster_317314 | 17 | 6  | 7  | 11 | 71 | 35  | LI   | 3.76   | 0.0524 | 0.0308 |                                 | phage head-tail joining family protein                                             | N |
| Cluster_317316 | 15 | 4  | 9  | 13 | 63 | 24  | LI   | 4.61   | 0.0318 | 0.0252 |                                 | putative bacteriophage protein                                                     | N |
| Cluster_317552 | 7  | 0  | 17 | 17 | 29 | 0   | LI   | 4.10   | 0.0430 | 0.0295 |                                 | conserved hypothetical protein                                                     | N |
| Cluster_317698 | 6  | 0  | 18 | 17 | 25 | 0   | LI   | 3.18   | 0.0746 | 0.0327 |                                 | caudovirales tail fibre assembly family protein                                    | N |
| Cluster_320510 | 6  | 11 | 18 | 6  | 25 | 65  | AI   | 4.93   | 0.0264 | 0.0230 |                                 | conserved hypothetical protein                                                     | Y |
| Cluster_322330 | 6  | 11 | 18 | 6  | 25 | 65  | AI   | 4.93   | 0.0264 | 0.0230 |                                 | conserved hypothetical protein                                                     | N |
| Cluster_322352 | 7  | 11 | 17 | 6  | 29 | 65  | AI   | 3.76   | 0.0524 | 0.0308 |                                 | conserved hypothetical protein                                                     | N |
| Cluster_334902 | 7  | 0  | 17 | 17 | 29 | 0   | LI   | 4.10   | 0.0430 | 0.0295 |                                 | conserved hypothetical protein                                                     | N |
| Cluster_340924 | 15 | 16 | 9  | 1  | 63 | 94  | AI   | 3.82   | 0.0508 | 0.0281 |                                 | ribbon-helix-helix , copG family protein                                           | N |
| Cluster_34159  | 13 | 2  | 11 | 15 | 54 | 12  | LI   | 5.99   | 0.0144 | 0.0082 |                                 | conserved hypothetical protein                                                     | N |
| Cluster_341980 | 22 | 11 | 2  | 6  | 92 | 65  | LI   | 3.05   | 0.0808 | 0.0486 |                                 | conserved hypothetical protein                                                     | Y |
| Cluster_346831 | 16 | 5  | 8  | 12 | 67 | 29  | LI   | 4.14   | 0.0419 | 0.0278 |                                 | conserved hypothetical protein                                                     | N |
| Cluster_39077  | 17 | 6  | 7  | 11 | 71 | 35  | LI   | 3.76   | 0.0524 | 0.0308 |                                 | conserved hypothetical protein                                                     | N |
| Cluster_40179  | 18 | 17 | 6  | 0  | 75 | 100 | AI   | 3.18   | 0.0746 | 0.0327 |                                 | prophage minor tail Z family protein                                               | N |
| Cluster_42814  | 4  | 8  | 20 | 9  | 17 | 47  | AI   | 3.09   | 0.0786 | 0.0454 |                                 | glycosyltransferase like 2 family protein                                          | N |
| Cluster_43605  | 18 | 6  | 11 | 75 | 35 | LI  | 4.93 | 0.0264 | 0.0230 |        | HNH endonuclease family protein | N                                                                                  |   |
| Cluster_53910  | 1  | 6  | 23 | 11 | 4  | 35  | AI   | 4.79   | 0.0286 | 0.0141 | <i>intA</i>                     | prophage CP4-57 integrase                                                          | N |
| Cluster_56014  | 22 | 11 | 2  | 6  | 92 | 65  | LI   | 3.05   | 0.0808 | 0.0486 |                                 | hydantoinase/oxoprolinase family protein                                           | N |
| Cluster_57681  | 6  | 11 | 18 | 6  | 25 | 65  | AI   | 4.93   | 0.0264 | 0.0230 |                                 | conserved hypothetical protein                                                     | N |
| Cluster_58277  | 10 | 1  | 14 | 16 | 42 | 6   | LI   | 4.80   | 0.0285 | 0.0136 |                                 | helix-turn-helix, Psq domain protein                                               | N |
| Cluster_59004  | 17 | 4  | 7  | 13 | 71 | 24  | LI   | 7.12   | 0.0076 | 0.0044 |                                 | phage prohead protease, HK97 family                                                | N |
| Cluster_63459  | 4  | 10 | 20 | 7  | 17 | 59  | AI   | 6.10   | 0.0135 | 0.0079 |                                 | putative derepression protein                                                      | N |
| Cluster_67359  | 1  | 6  | 23 | 11 | 4  | 35  | AI   | 4.79   | 0.0286 | 0.0141 | <i>intA</i>                     | prophage CP4-57 integrase                                                          | N |
| Cluster_72088  | 9  | 1  | 15 | 16 | 38 | 6   | LI   | 3.82   | 0.0508 | 0.0281 |                                 | glycosyl transferases group 1 family protein                                       | Y |
| Cluster_74193  | 7  | 0  | 17 | 17 | 29 | 0   | LI   | 4.10   | 0.0430 | 0.0295 |                                 | phage major capsid E family protein                                                | N |
| Cluster_80024  | 6  | 0  | 18 | 17 | 25 | 0   | LI   | 3.18   | 0.0746 | 0.0327 |                                 | esterase family protein                                                            | N |
| Cluster_80973  | 15 | 4  | 9  | 13 | 63 | 24  | LI   | 4.61   | 0.0318 | 0.0252 |                                 | phage integrase family protein                                                     | N |
| Cluster_82368  | 6  | 0  | 18 | 17 | 25 | 0   | LI   | 3.18   | 0.0746 | 0.0327 | <i>fljC</i>                     | flagellin                                                                          | N |
| Cluster_83254  | 6  | 0  | 18 | 17 | 25 | 0   | LI   | 3.18   | 0.0746 | 0.0327 |                                 | glycosyl transferases group 1 family protein                                       | N |
| Cluster_83718  | 7  | 12 | 17 | 5  | 29 | 71  | AI   | 5.30   | 0.0213 | 0.0124 | <i>traN</i>                     | type-F conjugative transfer system mating-pair stabilization protein TraN          | Y |
| Cluster_83792  | 6  | 0  | 18 | 17 | 25 | 0   | LI   | 3.18   | 0.0746 | 0.0327 |                                 | conserved hypothetical protein                                                     | N |
| Cluster_83828  | 19 | 8  | 5  | 9  | 79 | 47  | LI   | 3.25   | 0.0716 | 0.0476 |                                 | conserved hypothetical protein                                                     | N |
| Cluster_83929  | 6  | 0  | 18 | 17 | 25 | 0   | LI   | 3.18   | 0.0746 | 0.0327 | <i>rtbB</i>                     | dTDP-glucose 4,6-dehydratase                                                       | N |
| Cluster_84063  | 6  | 0  | 18 | 17 | 25 | 0   | LI   | 3.18   | 0.0746 | 0.0327 |                                 | polysaccharide biosynthesis/export family protein                                  | Y |
| Cluster_84140  | 6  | 0  | 18 | 17 | 25 | 0   | LI   | 3.18   | 0.0746 | 0.0327 |                                 | putative cymA protein                                                              | Y |
| Cluster_95058  | 7  | 0  | 17 | 17 | 29 | 0   | LI   | 4.10   | 0.0430 | 0.0295 |                                 | putative antirepressor protein                                                     | N |
| Cluster_97528  | 8  | 0  | 16 | 17 | 33 | 0   | LI   | 5.08   | 0.0242 | 0.0128 |                                 | ead/Ea22-like family protein                                                       | N |
| Cluster_97572  | 6  | 0  | 18 | 17 | 25 | 0   | LI   | 3.18   | 0.0746 | 0.0327 | <i>ynjE</i>                     | thiosulfate sulfurtransferase YnjE domain protein                                  | Y |

Non-lethal Symptomatic (NSI) vs. Asymptomatic (AI)

| Cluster ID     | No. of Genomes                |                              | Percentage of Genomes Containing Cluster |    |       | Chi-squared test |           | Fisher's exact test |         | Gene ID | Predicted Protein Function                               | Membrane or Secretion Domains |
|----------------|-------------------------------|------------------------------|------------------------------------------|----|-------|------------------|-----------|---------------------|---------|---------|----------------------------------------------------------|-------------------------------|
|                | Present (≥0.8) <sup>a,b</sup> | Absent (<0.8) <sup>a,b</sup> | NSI                                      | AI | % NSI | % AI             | Greater % | statistic           | p-value |         |                                                          |                               |
| Cluster_103192 | 6                             | 0                            | 14                                       | 17 | 30    | 0                | NSI       | 4.08                | 0.0434  | 0.0220  | putative phage protein                                   | N                             |
| Cluster_111596 | 8                             | 14                           | 12                                       | 3  | 40    | 82               | AI        | 5.19                | 0.0227  | 0.0176  | ethanolamine utilization EutN/Carboxysome family protein | N                             |
| Cluster_11511  | 2                             | 8                            | 18                                       | 9  | 10    | 47               | AI        | 4.66                | 0.0309  | 0.0234  | putative exported protein                                | Y                             |
| Cluster_11587  | 2                             | 9                            | 18                                       | 8  | 10    | 53               | AI        | 6.19                | 0.0129  | 0.0097  | transposase family protein                               | Y                             |
| Cluster_116275 | 5                             | 11                           | 15                                       | 6  | 25    | 65               | AI        | 4.40                | 0.0360  | 0.0220  | espF repeat family protein                               | Y                             |
| Cluster_118076 | 8                             | 14                           | 12                                       | 3  | 40    | 82               | AI        | 5.19                | 0.0227  | 0.0176  | shell protein                                            | N                             |
| Cluster_118816 | 12                            | 3                            | 8                                        | 14 | 60    | 18               | NSI       | 5.19                | 0.0227  | 0.0176  | conserved hypothetical protein                           | Y                             |
| Cluster_127742 | 8                             | 14                           | 12                                       | 3  | 40    | 82               | AI        | 5.19                | 0.0227  | 0.0176  | dehydratase medium subunit                               | Y                             |
| Cluster_127750 | 8                             | 14                           | 12                                       | 3  | 40    | 82               | AI        | 5.19                | 0.0227  | 0.0176  | iron-containing alcohol dehydrogenase family protein     | N                             |
| Cluster_128485 | 8                             | 1                            | 12                                       | 16 | 40    | 6                | NSI       | 4.11                | 0.0428  | 0.0227  | conserved hypothetical protein                           | Y                             |
| Cluster_128654 | 16                            | 8                            | 4                                        | 9  | 80    | 47               | NSI       | 3.05                | 0.0808  | 0.0470  | conserved hypothetical protein                           | Y                             |
| Cluster_132984 | 1                             | 7                            | 19                                       | 10 | 5     | 41               | AI        | 5.12                | 0.0236  | 0.0140  | traP family protein                                      | Y                             |
| Cluster_147193 | 1                             | 6                            | 19                                       | 11 | 5     | 35               | AI        | 3.70                | 0.0544  | 0.0335  | resolvase, N terminal domain protein                     | Y                             |
| Cluster_147543 | 6                             | 0                            | 14                                       | 17 | 30    | 0                | NSI       | 4.08                | 0.0434  | 0.0220  | putative yfjA                                            | Y                             |
| Cluster_147776 | 1                             | 8                            | 19                                       | 9  | 5     | 47               | AI        | 6.09                | 0.0097  | 0.0055  | conserved hypothetical protein                           | N                             |
| Cluster_151023 | 4                             | 11                           | 16                                       | 6  | 20    | 65               | AI        | 5.88                | 0.0153  | 0.0084  | conserved hypothetical protein                           | Y                             |
| Cluster_159210 | 13                            | 5                            | 7                                        | 12 | 65    | 29               | NSI       | 3.34                | 0.0675  | 0.0489  | conserved hypothetical protein                           | N                             |
| Cluster_166468 | 8                             | 14                           | 12                                       | 3  | 40    | 82               | AI        | 5.19                | 0.0227  | 0.0176  | cob(I)alamin adenosyltransferase                         | N                             |
| Cluster_166473 | 8                             | 14                           | 12                                       | 3  | 40    | 82               | AI        | 5.19                | 0.0227  | 0.0176  | propanediol utilization protein PduA                     | N                             |
| Cluster_167315 | 20                            | 11                           | 0                                        | 6  | 100   | 65               | NSI       | 6.03                | 0.0141  | 0.0053  | conserved hypothetical protein                           | N                             |
| Cluster_167317 | 20                            | 11                           | 0                                        | 6  | 100   | 65               | NSI       | 6.03                | 0.0141  | 0.0053  | intergenic-region protein                                | N                             |
| Cluster_168916 | 0                             | 5                            | 20                                       | 12 | 0     | 29               | AI        | 4.52                | 0.0335  | 0.0142  | nucleoside transporter family protein                    | Y                             |
| Cluster_169965 | 4                             | 10                           | 16                                       | 7  | 20    | 59               | AI        | 4.35                | 0.0369  | 0.0210  | ogr/Delta-like zinc finger family protein                | N                             |
| Cluster_172125 | 0                             | 4                            | 20                                       | 13 | 0     | 24               | AI        | 3.12                | 0.0774  | 0.0360  | conserved hypothetical protein                           | Y                             |
| Cluster_183342 | 7                             | 13                           | 13                                       | 4  | 35    | 76               | AI        | 4.80                | 0.0284  | 0.0202  | hypothetical protein                                     | Y                             |
| Cluster_186173 | 8                             | 14                           | 12                                       | 3  | 40    | 82               | AI        | 5.19                | 0.0227  | 0.0176  | BMC domain protein                                       | Y                             |
| Cluster_196208 | 8                             | 14                           | 12                                       | 3  | 40    | 82               | AI        | 5.19                | 0.0227  | 0.0176  | ethanolamine utilization protein, EutP                   | N                             |
| Cluster_196209 | 8                             | 14                           | 12                                       | 3  | 40    | 82               | AI        | 5.19                | 0.0227  | 0.0176  | propanediol utilization protein PduU                     | N                             |
| Cluster_196213 | 8                             | 13                           | 12                                       | 4  | 40    | 76               | AI        | 3.60                | 0.0576  | 0.0453  | aldehyde dehydrogenase family protein                    | N                             |
| Cluster_196229 | 8                             | 14                           | 12                                       | 3  | 40    | 82               | AI        | 5.19                | 0.0227  | 0.0176  | putative cobalamin biosynthesis protein CbiG             | Y                             |
| Cluster_197986 | 16                            | 8                            | 4                                        | 9  | 80    | 47               | NSI       | 3.05                | 0.0808  | 0.0470  | tellurite resistance TerB family protein                 | N                             |
| Cluster_200452 | 4                             | 10                           | 16                                       | 7  | 20    | 59               | AI        | 4.35                | 0.0369  | 0.0210  | putative prophage protein                                | N                             |
| Cluster_200454 | 4                             | 10                           | 16                                       | 7  | 20    | 59               | AI        | 4.35                | 0.0369  | 0.0210  | putative phage immunity repressor protein                | N                             |
| Cluster_203531 | 0                             | 4                            | 20                                       | 13 | 0     | 24               | AI        | 3.12                | 0.0774  | 0.0360  | nucleoside 2-deoxyribosyltransferase family protein      | N                             |
| Cluster_204051 | 5                             | 10                           | 15                                       | 7  | 25    | 59               | AI        | 3.07                | 0.0797  | 0.0498  | putative valyl-tRNA synthetase                           | N                             |
| Cluster_206540 | 0                             | 4                            | 20                                       | 13 | 0     | 24               | AI        | 3.12                | 0.0774  | 0.0360  | hNH endonuclease family protein                          | N                             |
| Cluster_221927 | 6                             | 0                            | 14                                       | 17 | 30    | 0                | NSI       | 4.08                | 0.0434  | 0.0220  | phage Tail Collar domain protein                         | Y                             |
| Cluster_225773 | 8                             | 14                           | 12                                       | 3  | 40    | 82               | AI        | 5.19                | 0.0227  | 0.0176  | propanediol dehydratase medium subunit                   | N                             |
| Cluster_225859 | 4                             | 9                            | 16                                       | 8  | 20    | 53               | AI        | 3.05                | 0.0808  | 0.0470  | putative glyco3, capsid size determination protein Sid   | N                             |
| Cluster_227577 | 2                             | 8                            | 18                                       | 9  | 10    | 47               | AI        | 4.66                | 0.0309  | 0.0234  | single-stranded DNA-binding protein                      | N                             |
| Cluster_230774 | 8                             | 14                           | 12                                       | 3  | 40    | 82               | AI        | 5.19                | 0.0227  | 0.0176  | phosphate propanoyltransferase                           | N                             |
| Cluster_232396 | 1                             | 8                            | 19                                       | 9  | 5     | 47               | AI        | 6.69                | 0.0097  | 0.0055  | putative dNA-binding helix-turn-helix protein            | N                             |
| Cluster_236053 | 12                            | 4                            | 8                                        | 13 | 60    | 24               | NSI       | 3.60                | 0.0576  | 0.0453  | conserved hypothetical protein                           | N                             |
| Cluster_252493 | 1                             | 6                            | 19                                       | 11 | 5     | 35               | AI        | 3.70                | 0.0544  | 0.0335  | putative arginyl-tRNA synthetase                         | N                             |
| Cluster_259784 | 8                             | 14                           | 12                                       | 3  | 40    | 82               | AI        | 5.19                | 0.0227  | 0.0176  | propanediol utilization protein PduA                     | N                             |
| Cluster_259786 | 8                             | 14                           | 12                                       | 3  | 40    | 82               | AI        | 5.19                | 0.0227  | 0.0176  | propanediol dehydratase large subunit                    | N                             |
| Cluster_259788 | 8                             | 14                           | 12                                       | 3  | 40    | 82               | AI        | 5.19                | 0.0227  | 0.0176  | propanediol dehydratase small subunit                    | N                             |
| Cluster_261617 | 13                            | 5                            | 7                                        | 12 | 65    | 29               | NSI       | 3.34                | 0.0675  | 0.0489  | conserved hypothetical protein                           | Y                             |
| Cluster_265851 | 8                             | 14                           | 12                                       | 3  | 40    | 82               | AI        | 5.19                | 0.0227  | 0.0176  | BMC domain protein                                       | N                             |

|                |    |    |    |    |    |    |     |      |        |        |             |                                                       |   |
|----------------|----|----|----|----|----|----|-----|------|--------|--------|-------------|-------------------------------------------------------|---|
| Cluster_265865 | 8  | 14 | 12 | 3  | 40 | 82 | AI  | 5.19 | 0.0227 | 0.0176 |             | electron transport complex, RnfABCDGE type, C subunit | N |
| Cluster_267235 | 9  | 2  | 11 | 15 | 45 | 12 | NSI | 3.40 | 0.0653 | 0.0365 |             | hypothetical protein                                  | N |
| Cluster_271578 | 4  | 10 | 16 | 7  | 20 | 59 | AI  | 4.35 | 0.0369 | 0.0210 |             | conserved hypothetical protein                        | N |
| Cluster_285156 | 7  | 1  | 13 | 16 | 35 | 6  | NSI | 3.04 | 0.0813 | 0.0481 | <i>espZ</i> | sepZ family protein                                   | Y |
| Cluster_297043 | 1  | 6  | 19 | 11 | 5  | 35 | AI  | 3.70 | 0.0544 | 0.0335 |             | hypothetical protein                                  | N |
| Cluster_297448 | 7  | 14 | 13 | 3  | 35 | 82 | AI  | 6.58 | 0.0103 | 0.0071 |             | conserved hypothetical protein                        | N |
| Cluster_297449 | 2  | 8  | 18 | 9  | 10 | 47 | AI  | 4.66 | 0.0309 | 0.0234 |             | conserved hypothetical protein                        | N |
| Cluster_302692 | 13 | 5  | 7  | 12 | 65 | 29 | NSI | 3.34 | 0.0675 | 0.0489 |             | hypothetical protein                                  | N |
| Cluster_303767 | 5  | 10 | 15 | 7  | 25 | 59 | AI  | 3.07 | 0.0797 | 0.0498 | <i>Ci</i>   | repressor protein Ci                                  | N |
| Cluster_309066 | 8  | 13 | 12 | 4  | 40 | 76 | AI  | 3.60 | 0.0576 | 0.0453 |             | conserved hypothetical protein                        | N |
| Cluster_309171 | 8  | 13 | 12 | 4  | 40 | 76 | AI  | 3.60 | 0.0576 | 0.0453 |             | outer membrane transport family protein               | Y |
| Cluster_310627 | 8  | 14 | 12 | 3  | 40 | 82 | AI  | 5.19 | 0.0227 | 0.0176 |             | helix-turn-helix domain protein                       | N |
| Cluster_312602 | 1  | 7  | 19 | 10 | 5  | 41 | AI  | 5.12 | 0.0236 | 0.0140 |             | HNH endonuclease family protein                       | N |
| Cluster_316955 | 4  | 10 | 16 | 7  | 20 | 59 | AI  | 4.35 | 0.0369 | 0.0210 |             | helix-turn-helix domain protein                       | N |
| Cluster_320510 | 4  | 11 | 16 | 6  | 20 | 65 | AI  | 5.88 | 0.0153 | 0.0084 |             | conserved hypothetical protein                        | Y |
| Cluster_321136 | 8  | 14 | 12 | 3  | 40 | 82 | AI  | 5.19 | 0.0227 | 0.0176 |             | MIP channel family protein                            | Y |
| Cluster_322029 | 13 | 4  | 7  | 13 | 65 | 24 | NSI | 4.80 | 0.0284 | 0.0202 |             | hypothetical protein                                  | N |
| Cluster_322330 | 4  | 11 | 16 | 6  | 20 | 65 | AI  | 5.88 | 0.0153 | 0.0084 |             | conserved hypothetical protein                        | N |
| Cluster_322352 | 5  | 11 | 15 | 6  | 25 | 65 | AI  | 4.40 | 0.0360 | 0.0220 |             | conserved hypothetical protein                        | N |
| Cluster_326585 | 0  | 4  | 20 | 13 | 0  | 24 | AI  | 3.12 | 0.0774 | 0.0360 |             | putative protein TraJ                                 | N |
| Cluster_334902 | 5  | 0  | 15 | 17 | 25 | 0  | NSI | 3.01 | 0.0829 | 0.0498 |             | conserved hypothetical protein                        | N |
| Cluster_337159 | 13 | 4  | 7  | 13 | 65 | 24 | NSI | 4.80 | 0.0284 | 0.0202 |             | conserved hypothetical protein                        | N |
| Cluster_340924 | 13 | 16 | 7  | 1  | 65 | 94 | AI  | 3.04 | 0.0813 | 0.0481 |             | ribbon-helix-helix, copG family protein               | N |
| Cluster_34159  | 10 | 2  | 10 | 15 | 50 | 12 | NSI | 4.51 | 0.0337 | 0.0173 |             | conserved hypothetical protein                        | N |
| Cluster_342331 | 13 | 5  | 7  | 12 | 65 | 29 | NSI | 3.34 | 0.0675 | 0.0489 |             | putative bacteriophage protein                        | N |
| Cluster_54451  | 5  | 10 | 15 | 7  | 25 | 59 | AI  | 3.07 | 0.0797 | 0.0498 |             | conserved hypothetical protein                        | N |
| Cluster_54644  | 8  | 14 | 12 | 3  | 40 | 82 | AI  | 5.19 | 0.0227 | 0.0176 |             | conserved hypothetical protein                        | N |
| Cluster_57681  | 4  | 11 | 16 | 6  | 20 | 65 | AI  | 5.88 | 0.0153 | 0.0084 |             | conserved hypothetical protein                        | N |
| Cluster_59342  | 7  | 1  | 13 | 16 | 35 | 6  | NSI | 3.04 | 0.0813 | 0.0481 |             | conserved hypothetical protein                        | N |
| Cluster_60983  | 0  | 4  | 20 | 13 | 0  | 24 | AI  | 3.12 | 0.0774 | 0.0360 |             | conserved hypothetical protein                        | N |
| Cluster_63459  | 4  | 10 | 16 | 7  | 20 | 59 | AI  | 4.35 | 0.0369 | 0.0210 |             | putative derepression protein                         | N |
| Cluster_72658  | 8  | 13 | 12 | 4  | 40 | 76 | AI  | 3.60 | 0.0576 | 0.0453 |             | putative propanediol utilization protein              | N |
| Cluster_74298  | 12 | 4  | 8  | 13 | 60 | 24 | NSI | 3.60 | 0.0576 | 0.0453 |             | traP family protein                                   | Y |
| Cluster_74308  | 13 | 5  | 7  | 12 | 65 | 29 | NSI | 3.34 | 0.0675 | 0.0489 | <i>traY</i> | relaxosome protein TraY                               | N |
| Cluster_79228  | 0  | 5  | 20 | 12 | 0  | 29 | AI  | 4.52 | 0.0335 | 0.0142 |             | conserved hypothetical protein                        | N |
| Cluster_82579  | 7  | 14 | 13 | 3  | 35 | 82 | AI  | 6.58 | 0.0103 | 0.0071 | <i>espJ</i> | putative non-LEE-encoded effector EspJ                | N |
| Cluster_84849  | 13 | 5  | 7  | 12 | 65 | 29 | NSI | 3.34 | 0.0675 | 0.0489 |             | conserved hypothetical protein                        | N |
| Cluster_89529  | 5  | 10 | 15 | 7  | 25 | 59 | AI  | 3.07 | 0.0797 | 0.0498 |             | hypothetical protein                                  | N |

<sup>a</sup>Genes were grouped into gene clusters using an "inclusive" clustering threshold of  $\geq 80\%$  nucleotide identity.

<sup>b</sup>Gene clusters identified as "present" have a TBLASTN LS-BSR  $\geq 0.8$ , while those that are "absent" have a TBLASTN LS-BSR  $< 0.8$ .

<sup>c</sup>Clinical outcomes are classified as lethal (L), non-lethal symptomatic (NSI), and asymptomatic (AI).

**Table S8.** Genes identified by LS-BSR that are significantly correlated with symptomatic, asymptomatic, lethal, or non-lethal clinical outcomes for all 70 EPEC genomes analyzed using an inclusive clustering threshold

| Cluster ID     | No. of Genomes                        |    |                                   |    |                                          |      |           | Chi-squared test |         | Fisher's exact test |      | Gene ID                                                               | Predicted Protein Function | Membrane or Secretion Domains |
|----------------|---------------------------------------|----|-----------------------------------|----|------------------------------------------|------|-----------|------------------|---------|---------------------|------|-----------------------------------------------------------------------|----------------------------|-------------------------------|
|                | Present ( $\geq 0.8$ ) <sup>a,b</sup> |    | Absent ( $< 0.8$ ) <sup>a,b</sup> |    | Percentage of Genomes Containing Cluster |      |           | statistic        | p-value | p-value             |      |                                                                       |                            |                               |
|                | LI+NSI                                | AI | LI+NSI                            | AI | % LI+NSI                                 | % AI | Greater % |                  |         |                     |      |                                                                       |                            |                               |
| Cluster_34159  | 25                                    | 2  | 22                                | 21 | 53                                       | 9    | LI+NSI    | 11.09            | 0.0009  | 0.0003              |      | conserved hypothetical protein                                        | N                          |                               |
| Cluster_297448 | 21                                    | 20 | 26                                | 3  | 45                                       | 87   | AI        | 9.70             | 0.0018  | 0.0008              |      | conserved hypothetical protein                                        | N                          |                               |
| Cluster_267235 | 23                                    | 2  | 24                                | 21 | 49                                       | 9    | LI+NSI    | 9.21             | 0.0024  | 0.0011              |      | hypothetical protein                                                  | N                          |                               |
| Cluster_54644  | 22                                    | 20 | 25                                | 3  | 47                                       | 87   | AI        | 8.77             | 0.0031  | 0.0016              |      | conserved hypothetical protein                                        | N                          |                               |
| Cluster_307754 | 34                                    | 7  | 13                                | 16 | 72                                       | 30   | LI+NSI    | 9.52             | 0.0020  | 0.0016              |      | regulatory protein cro                                                | N                          |                               |
| Cluster_327168 | 33                                    | 7  | 14                                | 16 | 70                                       | 30   | LI+NSI    | 8.42             | 0.0037  | 0.0022              |      | helix-turn-helix domain protein                                       | N                          |                               |
| Cluster_169965 | 9                                     | 13 | 38                                | 10 | 19                                       | 57   | AI        | 8.35             | 0.0039  | 0.0025              |      | ogr/Delta-like zinc finger family protein                             | N                          |                               |
| Cluster_200452 | 9                                     | 13 | 38                                | 10 | 19                                       | 57   | AI        | 8.35             | 0.0039  | 0.0025              |      | putative prophage protein                                             | N                          |                               |
| Cluster_200454 | 9                                     | 13 | 38                                | 10 | 19                                       | 57   | AI        | 8.35             | 0.0039  | 0.0025              |      | putative phage immunity repressor protein                             | N                          |                               |
| Cluster_271578 | 9                                     | 13 | 38                                | 10 | 19                                       | 57   | AI        | 8.35             | 0.0039  | 0.0025              |      | conserved hypothetical protein                                        | N                          |                               |
| Cluster_316955 | 9                                     | 13 | 38                                | 10 | 19                                       | 57   | AI        | 8.35             | 0.0039  | 0.0025              |      | helix-turn-helix domain protein                                       | N                          |                               |
| Cluster_63459  | 9                                     | 13 | 38                                | 10 | 19                                       | 57   | AI        | 8.35             | 0.0039  | 0.0025              |      | putative derepression protein                                         | N                          |                               |
| Cluster_262069 | 21                                    | 2  | 26                                | 21 | 45                                       | 9    | LI+NSI    | 7.51             | 0.0061  | 0.0027              |      | istB-like ATP binding family protein                                  | N                          |                               |
| Cluster_289981 | 21                                    | 2  | 26                                | 21 | 45                                       | 9    | LI+NSI    | 7.51             | 0.0061  | 0.0027              |      | integrase core domain protein                                         | N                          |                               |
| Cluster_168916 | 0                                     | 5  | 47                                | 18 | 0                                        | 22   | AI        | 7.97             | 0.0048  | 0.0028              |      | nucleoside transporter family protein                                 | Y                          |                               |
| Cluster_286659 | 47                                    | 18 | 0                                 | 5  | 100                                      | 78   | LI+NSI    | 7.97             | 0.0048  | 0.0028              | repA | incFII family plasmid replication initiator RepA                      | Y                          |                               |
| Cluster_147543 | 14                                    | 0  | 33                                | 23 | 30                                       | 0    | LI+NSI    | 6.80             | 0.0091  | 0.0029              |      | putative yfjA                                                         | Y                          |                               |
| Cluster_167317 | 46                                    | 17 | 1                                 | 6  | 98                                       | 74   | LI+NSI    | 7.37             | 0.0066  | 0.0042              |      | intergenic-region protein                                             | N                          |                               |
| Cluster_189418 | 1                                     | 6  | 46                                | 17 | 2                                        | 26   | AI        | 7.37             | 0.0066  | 0.0042              |      | conserved hypothetical protein                                        | N                          |                               |
| Cluster_9132   | 1                                     | 6  | 46                                | 17 | 2                                        | 26   | AI        | 7.37             | 0.0066  | 0.0042              |      | dinI-like family protein                                              | N                          |                               |
| Cluster_316814 | 2                                     | 7  | 45                                | 16 | 4                                        | 30   | AI        | 7.25             | 0.0071  | 0.0044              |      | AAA domain protein                                                    | N                          |                               |
| Cluster_94384  | 45                                    | 16 | 2                                 | 7  | 96                                       | 70   | LI+NSI    | 7.25             | 0.0071  | 0.0044              |      | transposase, Mutator family protein                                   | N                          |                               |
| Cluster_337159 | 25                                    | 4  | 22                                | 19 | 53                                       | 17   | LI+NSI    | 6.75             | 0.0094  | 0.0049              |      | conserved hypothetical protein                                        | N                          |                               |
| Cluster_74298  | 25                                    | 4  | 22                                | 19 | 53                                       | 17   | LI+NSI    | 6.75             | 0.0094  | 0.0049              |      | trpP family protein                                                   | Y                          |                               |
| Cluster_183593 | 20                                    | 2  | 27                                | 21 | 43                                       | 9    | LI+NSI    | 6.72             | 0.0095  | 0.0054              |      | conserved hypothetical protein                                        | N                          |                               |
| Cluster_276264 | 19                                    | 2  | 28                                | 21 | 40                                       | 9    | LI+NSI    | 5.97             | 0.0146  | 0.0063              |      | replication regulatory RepB family protein                            | N                          |                               |
| Cluster_341980 | 40                                    | 12 | 7                                 | 11 | 85                                       | 52   | LI+NSI    | 7.13             | 0.0076  | 0.0073              |      | conserved hypothetical protein                                        | Y                          |                               |
| Cluster_166870 | 36                                    | 10 | 11                                | 13 | 77                                       | 43   | LI+NSI    | 6.12             | 0.0134  | 0.0083              |      | integron integrase family protein                                     | N                          |                               |
| Cluster_157448 | 5                                     | 9  | 42                                | 14 | 11                                       | 39   | AI        | 6.16             | 0.0131  | 0.0094              | espS | putative T3SS effector protein EspS                                   | Y                          |                               |
| Cluster_171515 | 0                                     | 4  | 47                                | 19 | 0                                        | 17   | AI        | 5.74             | 0.0166  | 0.0097              |      | putative lipoprotein                                                  | N                          |                               |
| Cluster_171516 | 0                                     | 4  | 47                                | 19 | 0                                        | 17   | AI        | 5.74             | 0.0166  | 0.0097              |      | methyltransferase domain protein                                      | N                          |                               |
| Cluster_171517 | 0                                     | 4  | 47                                | 19 | 0                                        | 17   | AI        | 5.74             | 0.0166  | 0.0097              |      | beta-ketoacyl synthase, N-terminal domain protein                     | N                          |                               |
| Cluster_171518 | 0                                     | 4  | 47                                | 19 | 0                                        | 17   | AI        | 5.74             | 0.0166  | 0.0097              |      | acyltransferase family protein                                        | Y                          |                               |
| Cluster_171520 | 0                                     | 4  | 47                                | 19 | 0                                        | 17   | AI        | 5.74             | 0.0166  | 0.0097              |      | phosphopantetheine attachment site family protein                     | N                          |                               |
| Cluster_171523 | 0                                     | 4  | 47                                | 19 | 0                                        | 17   | AI        | 5.74             | 0.0166  | 0.0097              |      | conserved hypothetical protein                                        | N                          |                               |
| Cluster_171524 | 0                                     | 4  | 47                                | 19 | 0                                        | 17   | AI        | 5.74             | 0.0166  | 0.0097              |      | glycosyl transferase 2 family protein                                 | N                          |                               |
| Cluster_171527 | 0                                     | 4  | 47                                | 19 | 0                                        | 17   | AI        | 5.74             | 0.0166  | 0.0097              |      | MMPL family protein                                                   | Y                          |                               |
| Cluster_171531 | 0                                     | 4  | 47                                | 19 | 0                                        | 17   | AI        | 5.74             | 0.0166  | 0.0097              |      | KR domain protein                                                     | N                          |                               |
| Cluster_171532 | 0                                     | 4  | 47                                | 19 | 0                                        | 17   | AI        | 5.74             | 0.0166  | 0.0097              |      | beta-ketoacyl synthase, N-terminal domain protein                     | Y                          |                               |
| Cluster_172125 | 0                                     | 4  | 47                                | 19 | 0                                        | 17   | AI        | 5.74             | 0.0166  | 0.0097              |      | conserved hypothetical protein                                        | N                          |                               |
| Cluster_203531 | 0                                     | 4  | 47                                | 19 | 0                                        | 17   | AI        | 5.74             | 0.0166  | 0.0097              |      | nucleoside 2-deoxyribosyltransferase family protein                   | N                          |                               |
| Cluster_206025 | 0                                     | 4  | 47                                | 19 | 0                                        | 17   | AI        | 5.74             | 0.0166  | 0.0097              |      | phosphopantetheine attachment site family protein                     | N                          |                               |
| Cluster_206027 | 0                                     | 4  | 47                                | 19 | 0                                        | 17   | AI        | 5.74             | 0.0166  | 0.0097              |      | putative membrane protein                                             | Y                          |                               |
| Cluster_206028 | 0                                     | 4  | 47                                | 19 | 0                                        | 17   | AI        | 5.74             | 0.0166  | 0.0097              |      | AMP-binding enzyme family protein                                     | N                          |                               |
| Cluster_206031 | 0                                     | 4  | 47                                | 19 | 0                                        | 17   | AI        | 5.74             | 0.0166  | 0.0097              |      | thioesterase-like superfamily protein                                 | N                          |                               |
| Cluster_206032 | 0                                     | 4  | 47                                | 19 | 0                                        | 17   | AI        | 5.74             | 0.0166  | 0.0097              |      | outer membrane lipocarrier LoIA family protein                        | Y                          |                               |
| Cluster_206034 | 0                                     | 4  | 47                                | 19 | 0                                        | 17   | AI        | 5.74             | 0.0166  | 0.0097              |      | conserved hypothetical protein                                        | Y                          |                               |
| Cluster_206035 | 0                                     | 4  | 47                                | 19 | 0                                        | 17   | AI        | 5.74             | 0.0166  | 0.0097              |      | beta-ketoacyl synthase, N-terminal domain protein                     | N                          |                               |
| Cluster_206036 | 0                                     | 4  | 47                                | 19 | 0                                        | 17   | AI        | 5.74             | 0.0166  | 0.0097              |      | fabA-like domain protein                                              | N                          |                               |
| Cluster_206099 | 0                                     | 4  | 47                                | 19 | 0                                        | 17   | AI        | 5.74             | 0.0166  | 0.0097              |      | conserved hypothetical protein                                        | N                          |                               |
| Cluster_206540 | 0                                     | 4  | 47                                | 19 | 0                                        | 17   | AI        | 5.74             | 0.0166  | 0.0097              |      | hNH endonuclease family protein                                       | N                          |                               |
| Cluster_207740 | 0                                     | 4  | 47                                | 19 | 0                                        | 17   | AI        | 5.74             | 0.0166  | 0.0097              |      | caudovirales tail fibre assembly family protein                       | N                          |                               |
| Cluster_38836  | 0                                     | 4  | 47                                | 19 | 0                                        | 17   | AI        | 5.74             | 0.0166  | 0.0097              |      | phage integrase family protein                                        | N                          |                               |
| Cluster_83828  | 34                                    | 9  | 13                                | 14 | 72                                       | 39   | LI+NSI    | 5.86             | 0.0155  | 0.0098              |      | conserved hypothetical protein                                        | N                          |                               |
| Cluster_225861 | 8                                     | 11 | 39                                | 12 | 17                                       | 48   | AI        | 5.93             | 0.0148  | 0.0100              | psu  | polarity suppression protein                                          | N                          |                               |
| Cluster_302692 | 26                                    | 5  | 21                                | 18 | 55                                       | 22   | LI+NSI    | 5.76             | 0.0164  | 0.0105              |      | hypothetical protein                                                  | N                          |                               |
| Cluster_82579  | 21                                    | 18 | 26                                | 5  | 45                                       | 78   | AI        | 5.76             | 0.0164  | 0.0105              | espJ | putative non-LEE-encoded effector EspJ                                | N                          |                               |
| Cluster_84849  | 26                                    | 5  | 21                                | 18 | 55                                       | 22   | LI+NSI    | 5.76             | 0.0164  | 0.0105              |      | conserved hypothetical protein                                        | N                          |                               |
| Cluster_116275 | 15                                    | 15 | 32                                | 8  | 32                                       | 65   | AI        | 5.70             | 0.0170  | 0.0108              |      | espF repeat family protein                                            | Y                          |                               |
| Cluster_225859 | 9                                     | 12 | 38                                | 11 | 19                                       | 52   | AI        | 6.52             | 0.0106  | 0.0111              |      | putative glyco3, capsid size determination protein Sid                | N                          |                               |
| Cluster_309171 | 17                                    | 16 | 30                                | 7  | 36                                       | 70   | AI        | 5.64             | 0.0176  | 0.0113              |      | outer membrane transport family protein                               | Y                          |                               |
| Cluster_297253 | 44                                    | 16 | 3                                 | 7  | 94                                       | 70   | LI+NSI    | 5.46             | 0.0194  | 0.0115              |      | transposase, Mutator family protein                                   | Y                          |                               |
| Cluster_262291 | 36                                    | 23 | 11                                | 0  | 77                                       | 100  | AI        | 4.74             | 0.0294  | 0.0122              |      | type III secretion, HrpO family protein                               | Y                          |                               |
| Cluster_167315 | 45                                    | 17 | 2                                 | 6  | 96                                       | 74   | LI+NSI    | 5.27             | 0.0216  | 0.0128              |      | conserved hypothetical protein                                        | N                          |                               |
| Cluster_189417 | 1                                     | 5  | 46                                | 18 | 2                                        | 22   | AI        | 5.28             | 0.0215  | 0.0128              |      | acetyltransferase family protein                                      | N                          |                               |
| Cluster_191408 | 1                                     | 5  | 46                                | 18 | 2                                        | 22   | AI        | 5.28             | 0.0215  | 0.0128              |      | conserved hypothetical protein                                        | N                          |                               |
| Cluster_191933 | 1                                     | 5  | 46                                | 18 | 2                                        | 22   | AI        | 5.28             | 0.0215  | 0.0128              |      | 3-oxoacid CoA-transferase, B subunit                                  | N                          |                               |
| Cluster_191937 | 1                                     | 5  | 46                                | 18 | 2                                        | 22   | AI        | 5.28             | 0.0215  | 0.0128              |      | 3-hydroxybutyrate dehydrogenase family protein                        | Y                          |                               |
| Cluster_207859 | 1                                     | 5  | 46                                | 18 | 2                                        | 22   | AI        | 5.28             | 0.0215  | 0.0128              |      | conserved hypothetical protein                                        | N                          |                               |
| Cluster_316809 | 1                                     | 5  | 46                                | 18 | 2                                        | 22   | AI        | 5.28             | 0.0215  | 0.0128              |      | conserved hypothetical protein                                        | N                          |                               |
| Cluster_316818 | 2                                     | 6  | 45                                | 17 | 4                                        | 26   | AI        | 5.27             | 0.0216  | 0.0128              |      | putative predicted protein                                            | N                          |                               |
| Cluster_3723   | 2                                     | 6  | 45                                | 17 | 4                                        | 26   | AI        | 5.27             | 0.0216  | 0.0128              |      | conserved hypothetical protein                                        | N                          |                               |
| Cluster_51720  | 1                                     | 5  | 46                                | 18 | 2                                        | 22   | AI        | 5.28             | 0.0215  | 0.0128              |      | 3-oxoacid CoA-transferase, A subunit                                  | N                          |                               |
| Cluster_51724  | 1                                     | 5  | 46                                | 18 | 2                                        | 22   | AI        | 5.28             | 0.0215  | 0.0128              |      | citrate transporter family protein                                    | N                          |                               |
| Cluster_76780  | 1                                     | 5  | 46                                | 18 | 2                                        | 22   | AI        | 5.28             | 0.0215  | 0.0128              |      | lysR substrate binding domain protein                                 | Y                          |                               |
| Cluster_76783  | 1                                     | 5  | 46                                | 18 | 2                                        | 22   | AI        | 5.28             | 0.0215  | 0.0128              |      | acetyl-CoA C-acetyltransferase family protein                         | N                          |                               |
| Cluster_7789   | 1                                     | 5  | 46                                | 18 | 2                                        | 22   | AI        | 5.28             | 0.0215  | 0.0128              |      | 3-hydroxyacyl-CoA dehydrogenase, NAD binding domain protein           | N                          |                               |
| Cluster_78613  | 2                                     | 6  | 45                                | 17 | 4                                        | 26   | AI        | 5.27             | 0.0216  | 0.0128              |      | putative prophage protein                                             | N                          |                               |
| Cluster_79228  | 1                                     | 5  | 46                                | 18 | 2                                        | 22   | AI        | 5.28             | 0.0215  | 0.0128              |      | conserved hypothetical protein                                        | N                          |                               |
| Cluster_297449 | 4                                     | 8  | 43                                | 15 | 9                                        | 35   | AI        | 5.77             | 0.0163  | 0.0145              |      | conserved hypothetical protein                                        | N                          |                               |
| Cluster_128383 | 14                                    | 1  | 33                                | 22 | 30                                       | 4    | LI+NSI    | 4.52             | 0.0335  | 0.0147              |      | conserved hypothetical protein                                        | N                          |                               |
| Cluster_128390 | 14                                    | 1  | 33                                | 22 | 30                                       | 4    | LI+NSI    | 4.52             | 0.0335  | 0.0147              |      | conserved hypothetical protein                                        | N                          |                               |
| Cluster_164940 | 14                                    | 1  | 33                                | 22 | 30                                       | 4    | LI+NSI    | 4.52             | 0.0335  | 0.0147              |      | viral (Super1) RNA helicase family protein                            | N                          |                               |
| Cluster_183140 | 14                                    | 1  | 33                                | 22 | 30                                       | 4    | LI+NSI    | 4.52             | 0.0335  | 0.0147              |      | AAA domain protein                                                    | N                          |                               |
| Cluster_276697 | 14                                    | 1  | 33                                | 22 | 30                                       | 4    | LI+NSI    | 4.52             | 0.0335  | 0.0147              |      | putative escherichia coli chi7122 chi7122 genomic chromosome, chi7122 | Y                          |                               |
| Cluster_291795 | 14                                    | 1  | 33                                | 22 | 30                                       | 4    | LI+NSI    | 4.52             | 0.0335  | 0.0147              |      | conserved hypothetical protein                                        | N                          |                               |
| Cluster_58277  | 14                                    | 1  | 33                                | 22 | 30                                       | 4    | LI+NSI    | 4.52             | 0.0335  | 0.0147              |      | putative acetyltransferase                                            | Y                          |                               |
| Cluster_59092  | 14                                    | 1  | 33                                | 22 | 30                                       | 4    | LI+NSI    | 4.52             | 0.0335  | 0.0147              |      | helix-turn-helix, Pqs domain protein                                  | N                          |                               |
| Cluster_73497  | 14                                    | 1  | 33                                | 22 | 30                                       | 4    | LI+NSI    | 4.52             | 0.0335  | 0.0147              |      | conserved hypothetical protein                                        | N                          |                               |
| Cluster_98944  | 14                                    | 1  | 33                                | 22 | 30                                       | 4    | LI+NSI    | 4.52             | 0.0335  | 0.0147              |      | conserved hypothetical protein                                        | N                          |                               |
| Cluster_303065 | 23                                    | 4  | 24                                | 19 | 49                                       | 17   | LI+NSI    | 5.22             | 0.0223  | 0.0176              |      | conserved hypothetical protein                                        | N                          |                               |
| Cluster_48952  | 23                                    | 4  | 24                                | 19 | 49                                       | 17   | LI+NSI    | 5.22             | 0.0223  | 0.0176              |      | conserved hypothetical protein                                        | Y                          |                               |
| Cluster_342331 | 25                                    | 5  | 22                                | 18 | 53                                       | 22   | LI+NSI    | 5.02             | 0.0251  | 0.0198              |      | putative bacteriophage protein                                        | N                          |                               |
| Cluster_56633  | 25                                    | 5  | 22                                | 18 | 53                                       | 22   | LI+NSI    | 5.02             | 0.0251  | 0.0198              |      | conserved hypothetical protein                                        | N                          |                               |
| Cluster_107351 | 17                                    | 2  | 30                                | 21 | 36                                       | 9    | LI+NSI    | 4.59             | 0.0322  | 0.0209              |      | conserved hypothetical protein                                        | N                          |                               |
| Cluster_312794 | 17                                    | 2  | 30                                | 21 | 36                                       | 9    | LI+NSI    | 4.59             | 0.0322  | 0.0209              |      | transposase DDE domain protein                                        | N                          |                               |
| Cluster_346831 | 27                                    | 6  | 20                                | 17 | 57                                       | 26   | LI+NSI    | 4.90             | 0.0268  | 0.0211              |      | conserved hypothetical protein                                        | N                          |                               |
| Cluster_210977 | 5                                     | 8  | 42                                | 15 | 11                                       | 35   | AI        | 4.46             | 0.0346  | 0.0223              |      | conserved hypothetical protein                                        | N                          |                               |
| Cluster_147776 | 9                                     | 11 | 38                                | 12 | 19                                       | 48   | AI        | 4.90             | 0.0269  | 0.0227              |      | conserved hypothetical protein                                        | N                          |                               |

|                |    |    |    |    |    |    |        |      |        |        |                                                                                       |   |
|----------------|----|----|----|----|----|----|--------|------|--------|--------|---------------------------------------------------------------------------------------|---|
| Cluster_232396 | 9  | 11 | 38 | 12 | 19 | 48 | AI     | 4.90 | 0.0269 | 0.0227 | putative dNA-binding helix-turn-helix protein                                         | N |
| Cluster_102885 | 39 | 13 | 8  | 10 | 83 | 57 | LI+NSI | 4.36 | 0.0368 | 0.0228 | integrase core domain protein                                                         | N |
| Cluster_56999  | 8  | 10 | 39 | 13 | 17 | 43 | AI     | 4.36 | 0.0368 | 0.0228 | putative P4-specific DNA primase                                                      | N |
| Cluster_183342 | 21 | 17 | 26 | 6  | 45 | 74 | AI     | 4.20 | 0.0403 | 0.0244 | hypothetical protein                                                                  | Y |
| Cluster_47222  | 26 | 6  | 21 | 17 | 55 | 26 | LI+NSI | 4.20 | 0.0403 | 0.0244 | conserved hypothetical protein                                                        | N |
| Cluster_139135 | 10 | 0  | 37 | 23 | 21 | 0  | LI+NSI | 4.10 | 0.0428 | 0.0245 | putative pyridoxamine 5-phosphate-dependent dehydrase                                 | N |
| Cluster_166190 | 10 | 0  | 37 | 23 | 21 | 0  | LI+NSI | 4.10 | 0.0428 | 0.0245 | phage integrase family protein                                                        | N |
| Cluster_291294 | 10 | 0  | 37 | 23 | 21 | 0  | LI+NSI | 4.10 | 0.0428 | 0.0245 | putative pyridoxamine 5-phosphate-dependent dehydrase                                 | Y |
| Cluster_103192 | 9  | 0  | 38 | 23 | 19 | 0  | LI+NSI | 3.49 | 0.0618 | 0.0254 | putative phage protein                                                                | N |
| Cluster_106122 | 9  | 0  | 38 | 23 | 19 | 0  | LI+NSI | 3.49 | 0.0618 | 0.0254 | conserved hypothetical protein                                                        | N |
| Cluster_107548 | 9  | 0  | 38 | 23 | 19 | 0  | LI+NSI | 3.49 | 0.0618 | 0.0254 | conserved hypothetical protein                                                        | N |
| Cluster_107738 | 9  | 0  | 38 | 23 | 19 | 0  | LI+NSI | 3.49 | 0.0618 | 0.0254 | putative membrane protein                                                             | Y |
| Cluster_108649 | 9  | 0  | 38 | 23 | 19 | 0  | LI+NSI | 3.49 | 0.0618 | 0.0254 | conserved hypothetical protein                                                        | N |
| Cluster_115298 | 9  | 0  | 38 | 23 | 19 | 0  | LI+NSI | 3.49 | 0.0618 | 0.0254 | conserved hypothetical protein                                                        | N |
| Cluster_119046 | 9  | 0  | 38 | 23 | 19 | 0  | LI+NSI | 3.49 | 0.0618 | 0.0254 | putative tail fiber protein                                                           | N |
| Cluster_127350 | 9  | 0  | 38 | 23 | 19 | 0  | LI+NSI | 3.49 | 0.0618 | 0.0254 | mannose-1-phosphate guanylyltransferase/mannose-6-phosphate isomerase                 | N |
| Cluster_152085 | 9  | 0  | 38 | 23 | 19 | 0  | LI+NSI | 3.49 | 0.0618 | 0.0254 | conserved hypothetical protein                                                        | N |
| Cluster_163907 | 9  | 0  | 38 | 23 | 19 | 0  | LI+NSI | 3.49 | 0.0618 | 0.0254 | glycosyltransferase Family 4 family protein                                           | N |
| Cluster_163915 | 9  | 0  | 38 | 23 | 19 | 0  | LI+NSI | 3.49 | 0.0618 | 0.0254 | glycosyl transferase 2 family protein                                                 | N |
| Cluster_163986 | 9  | 0  | 38 | 23 | 19 | 0  | LI+NSI | 3.49 | 0.0618 | 0.0254 | hypothetical protein                                                                  | N |
| Cluster_240829 | 9  | 0  | 38 | 23 | 19 | 0  | LI+NSI | 3.49 | 0.0618 | 0.0254 | hypothetical protein                                                                  | N |
| Cluster_25983  | 9  | 0  | 38 | 23 | 19 | 0  | LI+NSI | 3.49 | 0.0618 | 0.0254 | bacteriophage replication gene A family protein                                       | N |
| Cluster_261602 | 9  | 0  | 38 | 23 | 19 | 0  | LI+NSI | 3.49 | 0.0618 | 0.0254 | conserved hypothetical protein                                                        | N |
| Cluster_261817 | 9  | 0  | 38 | 23 | 19 | 0  | LI+NSI | 3.49 | 0.0618 | 0.0254 | putative predicted protein                                                            | N |
| Cluster_263945 | 9  | 0  | 38 | 23 | 19 | 0  | LI+NSI | 3.49 | 0.0618 | 0.0254 | conserved hypothetical protein                                                        | N |
| Cluster_265998 | 9  | 0  | 38 | 23 | 19 | 0  | LI+NSI | 3.49 | 0.0618 | 0.0254 | conserved hypothetical protein                                                        | N |
| Cluster_266287 | 9  | 0  | 38 | 23 | 19 | 0  | LI+NSI | 3.49 | 0.0618 | 0.0254 | hypothetical protein                                                                  | Y |
| Cluster_272862 | 9  | 0  | 38 | 23 | 19 | 0  | LI+NSI | 3.49 | 0.0618 | 0.0254 | helix-turn-helix domain protein                                                       | N |
| Cluster_276634 | 9  | 0  | 38 | 23 | 19 | 0  | LI+NSI | 3.49 | 0.0618 | 0.0254 | caudovirales tail fibre assembly family protein                                       | N |
| Cluster_287882 | 9  | 0  | 38 | 23 | 19 | 0  | LI+NSI | 3.49 | 0.0618 | 0.0254 | conserved hypothetical protein                                                        | N |
| Cluster_291165 | 9  | 0  | 38 | 23 | 19 | 0  | LI+NSI | 3.49 | 0.0618 | 0.0254 | phage integrase family protein                                                        | N |
| Cluster_69486  | 9  | 0  | 38 | 23 | 19 | 0  | LI+NSI | 3.49 | 0.0618 | 0.0254 | conserved hypothetical protein                                                        | N |
| Cluster_69487  | 9  | 0  | 38 | 23 | 19 | 0  | LI+NSI | 3.49 | 0.0618 | 0.0254 | conserved hypothetical protein                                                        | N |
| Cluster_71994  | 9  | 0  | 38 | 23 | 19 | 0  | LI+NSI | 3.49 | 0.0618 | 0.0254 | glycosyl transferase 11 family protein                                                | N |
| Cluster_72685  | 9  | 0  | 38 | 23 | 19 | 0  | LI+NSI | 3.49 | 0.0618 | 0.0254 | conserved hypothetical protein                                                        | N |
| Cluster_74193  | 9  | 0  | 38 | 23 | 19 | 0  | LI+NSI | 3.49 | 0.0618 | 0.0254 | phage major capsid E family protein                                                   | N |
| Cluster_128386 | 13 | 1  | 34 | 22 | 28 | 4  | LI+NSI | 3.89 | 0.0486 | 0.0262 | putative pcar                                                                         | Y |
| Cluster_128485 | 13 | 1  | 34 | 22 | 28 | 4  | LI+NSI | 3.89 | 0.0486 | 0.0262 | conserved hypothetical protein                                                        | Y |
| Cluster_14414  | 13 | 1  | 34 | 22 | 28 | 4  | LI+NSI | 3.89 | 0.0486 | 0.0262 | conserved hypothetical protein                                                        | N |
| Cluster_11587  | 6  | 9  | 41 | 14 | 13 | 39 | AI     | 4.91 | 0.0268 | 0.0269 | transposase family protein                                                            | Y |
| Cluster_132984 | 6  | 9  | 41 | 14 | 13 | 39 | AI     | 4.91 | 0.0268 | 0.0269 | traP family protein                                                                   | Y |
| Cluster_178309 | 41 | 14 | 6  | 9  | 87 | 61 | LI+NSI | 4.91 | 0.0268 | 0.0269 | conserved hypothetical protein                                                        | N |
| Cluster_64291  | 41 | 14 | 6  | 9  | 87 | 61 | LI+NSI | 4.91 | 0.0268 | 0.0269 | <i>folP</i> dihydropterate synthase                                                   | N |
| Cluster_177188 | 19 | 3  | 28 | 20 | 40 | 13 | LI+NSI | 4.18 | 0.0410 | 0.0279 | phage integrase family protein                                                        | N |
| Cluster_260984 | 19 | 3  | 28 | 20 | 40 | 13 | LI+NSI | 4.18 | 0.0410 | 0.0279 | <i>traN</i> type-F conjugative transfer system mating-pair stabilization protein TraN | Y |
| Cluster_88073  | 36 | 11 | 11 | 12 | 77 | 48 | LI+NSI | 4.56 | 0.0327 | 0.0288 | small Multidrug Resistance family protein                                             | Y |
| Cluster_151023 | 10 | 11 | 37 | 12 | 21 | 48 | AI     | 4.00 | 0.0456 | 0.0292 | conserved hypothetical protein                                                        | Y |
| Cluster_320510 | 10 | 11 | 37 | 12 | 21 | 48 | AI     | 4.00 | 0.0456 | 0.0292 | conserved hypothetical protein                                                        | Y |
| Cluster_322330 | 10 | 11 | 37 | 12 | 21 | 48 | AI     | 4.00 | 0.0456 | 0.0292 | conserved hypothetical protein                                                        | N |
| Cluster_57681  | 10 | 11 | 37 | 12 | 21 | 48 | AI     | 4.00 | 0.0456 | 0.0292 | conserved hypothetical protein                                                        | N |
| Cluster_90939  | 37 | 12 | 10 | 11 | 79 | 52 | LI+NSI | 4.00 | 0.0456 | 0.0292 | plasmid stability family protein                                                      | N |
| Cluster_1253   | 0  | 3  | 47 | 20 | 0  | 13 | AI     | 3.62 | 0.0571 | 0.0324 | glycosyl transferases group 1 family protein                                          | N |
| Cluster_1259   | 0  | 3  | 47 | 20 | 0  | 13 | AI     | 3.62 | 0.0571 | 0.0324 | N-acetyl sugar amidotransferase family protein                                        | N |
| Cluster_1317   | 0  | 3  | 47 | 20 | 0  | 13 | AI     | 3.62 | 0.0571 | 0.0324 | phage tail-collar fibre family protein                                                | Y |
| Cluster_170088 | 0  | 3  | 47 | 20 | 0  | 13 | AI     | 3.62 | 0.0571 | 0.0324 | conserved hypothetical protein                                                        | N |
| Cluster_171495 | 0  | 3  | 47 | 20 | 0  | 13 | AI     | 3.62 | 0.0571 | 0.0324 | conserved hypothetical protein                                                        | N |
| Cluster_171552 | 0  | 3  | 47 | 20 | 0  | 13 | AI     | 3.62 | 0.0571 | 0.0324 | binding-protein-dependent transport system inner membrane component family protein    | Y |
| Cluster_171553 | 0  | 3  | 47 | 20 | 0  | 13 | AI     | 3.62 | 0.0571 | 0.0324 | binding-protein-dependent transport system inner membrane component family protein    | N |
| Cluster_171556 | 0  | 3  | 47 | 20 | 0  | 13 | AI     | 3.62 | 0.0571 | 0.0324 | ROK family protein                                                                    | N |
| Cluster_191111 | 0  | 3  | 47 | 20 | 0  | 13 | AI     | 3.62 | 0.0571 | 0.0324 | conserved hypothetical protein                                                        | N |
| Cluster_191112 | 0  | 3  | 47 | 20 | 0  | 13 | AI     | 3.62 | 0.0571 | 0.0324 | conserved hypothetical protein                                                        | N |
| Cluster_191123 | 0  | 3  | 47 | 20 | 0  | 13 | AI     | 3.62 | 0.0571 | 0.0324 | conserved hypothetical protein                                                        | Y |
| Cluster_191127 | 0  | 3  | 47 | 20 | 0  | 13 | AI     | 3.62 | 0.0571 | 0.0324 | conserved hypothetical protein                                                        | N |
| Cluster_191132 | 0  | 3  | 47 | 20 | 0  | 13 | AI     | 3.62 | 0.0571 | 0.0324 | conserved hypothetical protein                                                        | N |
| Cluster_191136 | 0  | 3  | 47 | 20 | 0  | 13 | AI     | 3.62 | 0.0571 | 0.0324 | hypothetical protein                                                                  | N |
| Cluster_206057 | 0  | 3  | 47 | 20 | 0  | 13 | AI     | 3.62 | 0.0571 | 0.0324 | bacterial extracellular solute-binding family protein                                 | Y |
| Cluster_206061 | 0  | 3  | 47 | 20 | 0  | 13 | AI     | 3.62 | 0.0571 | 0.0324 | glycerophosphoryl diester phosphodiesterase family protein                            | N |
| Cluster_207555 | 0  | 3  | 47 | 20 | 0  | 13 | AI     | 3.62 | 0.0571 | 0.0324 | recF/RecN/SMC N terminal domain protein                                               | N |
| Cluster_207556 | 0  | 3  | 47 | 20 | 0  | 13 | AI     | 3.62 | 0.0571 | 0.0324 | conserved hypothetical protein                                                        | N |
| Cluster_207558 | 0  | 3  | 47 | 20 | 0  | 13 | AI     | 3.62 | 0.0571 | 0.0324 | conserved hypothetical protein                                                        | Y |
| Cluster_207848 | 0  | 3  | 47 | 20 | 0  | 13 | AI     | 3.62 | 0.0571 | 0.0324 | conserved hypothetical protein                                                        | N |
| Cluster_2357   | 0  | 3  | 47 | 20 | 0  | 13 | AI     | 3.62 | 0.0571 | 0.0324 | conserved hypothetical protein                                                        | N |
| Cluster_297042 | 0  | 3  | 47 | 20 | 0  | 13 | AI     | 3.62 | 0.0571 | 0.0324 | conserved hypothetical protein                                                        | N |
| Cluster_297563 | 0  | 3  | 47 | 20 | 0  | 13 | AI     | 3.62 | 0.0571 | 0.0324 | integrase core domain protein                                                         | N |
| Cluster_319815 | 0  | 3  | 47 | 20 | 0  | 13 | AI     | 3.62 | 0.0571 | 0.0324 | conserved hypothetical protein                                                        | N |
| Cluster_319816 | 0  | 3  | 47 | 20 | 0  | 13 | AI     | 3.62 | 0.0571 | 0.0324 | putative predicted protein                                                            | N |
| Cluster_321372 | 0  | 3  | 47 | 20 | 0  | 13 | AI     | 3.62 | 0.0571 | 0.0324 | conserved hypothetical protein                                                        | Y |
| Cluster_36336  | 0  | 3  | 47 | 20 | 0  | 13 | AI     | 3.62 | 0.0571 | 0.0324 | ABC transporter family protein                                                        | N |
| Cluster_36339  | 0  | 3  | 47 | 20 | 0  | 13 | AI     | 3.62 | 0.0571 | 0.0324 | cupin fold metallo, WbuC family protein                                               | N |
| Cluster_36341  | 0  | 3  | 47 | 20 | 0  | 13 | AI     | 3.62 | 0.0571 | 0.0324 | rmlD substrate binding domain protein                                                 | N |
| Cluster_36342  | 0  | 3  | 47 | 20 | 0  | 13 | AI     | 3.62 | 0.0571 | 0.0324 | dihydrouridine synthase family protein                                                | N |
| Cluster_36450  | 0  | 3  | 47 | 20 | 0  | 13 | AI     | 3.62 | 0.0571 | 0.0324 | <i>hisH</i> imidazole glycerol phosphate synthase, glutamine amidotransferase subunit | N |
| Cluster_36837  | 0  | 3  | 47 | 20 | 0  | 13 | AI     | 3.62 | 0.0571 | 0.0324 | type III restriction enzyme, res subunit                                              | N |
| Cluster_38630  | 0  | 3  | 47 | 20 | 0  | 13 | AI     | 3.62 | 0.0571 | 0.0324 | conserved hypothetical protein                                                        | N |
| Cluster_38770  | 0  | 3  | 47 | 20 | 0  | 13 | AI     | 3.62 | 0.0571 | 0.0324 | conserved hypothetical protein                                                        | N |
| Cluster_38775  | 0  | 3  | 47 | 20 | 0  | 13 | AI     | 3.62 | 0.0571 | 0.0324 | conserved hypothetical protein                                                        | N |
| Cluster_38777  | 0  | 3  | 47 | 20 | 0  | 13 | AI     | 3.62 | 0.0571 | 0.0324 | conserved hypothetical protein                                                        | N |
| Cluster_3917   | 0  | 3  | 47 | 20 | 0  | 13 | AI     | 3.62 | 0.0571 | 0.0324 | putative cytochrome P450 51                                                           | N |
| Cluster_39213  | 0  | 3  | 47 | 20 | 0  | 13 | AI     | 3.62 | 0.0571 | 0.0324 | polysaccharide deacetylase family protein                                             | N |
| Cluster_3924   | 0  | 3  | 47 | 20 | 0  | 13 | AI     | 3.62 | 0.0571 | 0.0324 | caudovirus prohead protease family protein                                            | N |
| Cluster_39245  | 0  | 3  | 47 | 20 | 0  | 13 | AI     | 3.62 | 0.0571 | 0.0324 | conserved hypothetical protein                                                        | N |
| Cluster_3925   | 0  | 3  | 47 | 20 | 0  | 13 | AI     | 3.62 | 0.0571 | 0.0324 | phage portal protein, lambda family                                                   | N |
| Cluster_39264  | 0  | 3  | 47 | 20 | 0  | 13 | AI     | 3.62 | 0.0571 | 0.0324 | ead/Ea22-like family protein                                                          | N |
| Cluster_3934   | 0  | 3  | 47 | 20 | 0  | 13 | AI     | 3.62 | 0.0571 | 0.0324 | conserved hypothetical protein                                                        | N |
| Cluster_39356  | 0  | 3  | 47 | 20 | 0  | 13 | AI     | 3.62 | 0.0571 | 0.0324 | P63C domain protein                                                                   | N |
| Cluster_39363  | 0  | 3  | 47 | 20 | 0  | 13 | AI     | 3.62 | 0.0571 | 0.0324 | conserved hypothetical protein                                                        | N |
| Cluster_4140   | 0  | 3  | 47 | 20 | 0  | 13 | AI     | 3.62 | 0.0571 | 0.0324 | <i>espN</i> putative t3SS effector protein EspN2-2                                    | N |
| Cluster_4584   | 0  | 3  | 47 | 20 | 0  | 13 | AI     | 3.62 | 0.0571 | 0.0324 | conserved hypothetical protein                                                        | N |
| Cluster_4591   | 0  | 3  | 47 | 20 | 0  | 13 | AI     | 3.62 | 0.0571 | 0.0324 | <i>msbB</i> lipid A biosynthesis (KDO)2-(lauroyl)-lipid IVA acyltransferase           | Y |
| Cluster_6512   | 0  | 3  | 47 | 20 | 0  | 13 | AI     | 3.62 | 0.0571 | 0.0324 | phage antitermination Q family protein                                                | N |
| Cluster_66187  | 0  | 3  | 47 | 20 | 0  | 13 | AI     | 3.62 | 0.0571 | 0.0324 | N-acetyl sugar amidotransferase family protein                                        | N |
| Cluster_6886   | 0  | 3  | 47 | 20 | 0  | 13 | AI     | 3.62 | 0.0571 | 0.0324 | transposase family protein                                                            | N |
| Cluster_69143  | 0  | 3  | 47 | 20 | 0  | 13 | AI     | 3.62 | 0.0571 | 0.0324 | conserved hypothetical protein                                                        | N |
| Cluster_7205   | 0  | 3  | 47 | 20 | 0  | 13 | AI     | 3.62 | 0.0571 | 0.0324 | phage tail fibre repeat family protein                                                | N |
| Cluster_8866   | 0  | 3  | 47 | 20 | 0  | 13 | AI     | 3.62 | 0.0571 | 0.0324 | conserved hypothetical protein                                                        | Y |
| Cluster_8868   | 0  | 3  | 47 | 20 | 0  | 13 | AI     | 3.62 | 0.0571 | 0.0324 | glycosyltransferase Family 4 family protein                                           | N |
| Cluster_94403  | 0  | 3  | 47 | 20 | 0  | 13 | AI     | 3.62 | 0.0571 | 0.0324 | conserved hypothetical protein                                                        | N |



|                |    |    |    |    |    |    |        |      |        |        |             |                                                                        |   |
|----------------|----|----|----|----|----|----|--------|------|--------|--------|-------------|------------------------------------------------------------------------|---|
| Cluster_321659 | 43 | 16 | 4  | 7  | 91 | 70 | LI+NSI | 4.07 | 0.0436 | 0.0324 | <i>bfpA</i> | major structural subunit of bundle-forming pilus                       | Y |
| Cluster_336502 | 43 | 16 | 4  | 7  | 91 | 70 | LI+NSI | 4.07 | 0.0436 | 0.0324 |             | type III/IV secretion system family protein                            | N |
| Cluster_53910  | 4  | 7  | 43 | 16 | 9  | 30 | AI     | 4.07 | 0.0436 | 0.0324 | <i>inta</i> | prophage CP4-57 integrase                                              | N |
| Cluster_67359  | 4  | 7  | 43 | 16 | 9  | 30 | AI     | 4.07 | 0.0436 | 0.0324 | <i>inta</i> | prophage CP4-57 integrase                                              | N |
| Cluster_238652 | 21 | 4  | 26 | 19 | 45 | 17 | LI+NSI | 3.89 | 0.0485 | 0.0339 |             | winged helix-turn-helix DNA-binding family protein                     | N |
| Cluster_78370  | 21 | 4  | 26 | 19 | 45 | 17 | LI+NSI | 3.89 | 0.0485 | 0.0339 |             | putative predicted protein                                             | N |
| Cluster_322942 | 2  | 5  | 45 | 18 | 4  | 22 | AI     | 3.48 | 0.0620 | 0.0345 |             | conserved hypothetical protein                                         | N |
| Cluster_119706 | 23 | 5  | 24 | 18 | 49 | 22 | LI+NSI | 3.69 | 0.0546 | 0.0385 |             | conserved hypothetical protein                                         | N |
| Cluster_132520 | 14 | 13 | 33 | 10 | 30 | 57 | AI     | 3.60 | 0.0578 | 0.0391 |             | phage capsid scaffolding (GPO) serine peptidase family protein         | N |
| Cluster_43705  | 30 | 8  | 17 | 15 | 64 | 35 | LI+NSI | 4.15 | 0.0418 | 0.0398 |             | conserved hypothetical protein                                         | Y |
| Cluster_301670 | 32 | 21 | 15 | 2  | 68 | 91 | AI     | 3.35 | 0.0671 | 0.0401 | <i>escU</i> | <i>escU</i>                                                            | Y |
| Cluster_263620 | 15 | 2  | 32 | 21 | 32 | 9  | LI+NSI | 3.35 | 0.0671 | 0.0401 |             | transposase DDE domain protein                                         | N |
| Cluster_72088  | 15 | 2  | 32 | 21 | 32 | 9  | LI+NSI | 3.35 | 0.0671 | 0.0401 |             | glycosyl transferases group 1 family protein                           | Y |
| Cluster_346882 | 25 | 6  | 22 | 17 | 53 | 26 | LI+NSI | 3.57 | 0.0590 | 0.0417 |             | conserved hypothetical protein                                         | N |
| Cluster_159210 | 27 | 7  | 20 | 16 | 57 | 30 | LI+NSI | 3.49 | 0.0616 | 0.0434 |             | conserved hypothetical protein                                         | N |
| Cluster_222333 | 27 | 7  | 20 | 16 | 57 | 30 | LI+NSI | 3.49 | 0.0616 | 0.0434 |             | phage major capsid protein, HK97 family                                | N |
| Cluster_59004  | 27 | 7  | 20 | 16 | 57 | 30 | LI+NSI | 3.49 | 0.0616 | 0.0434 |             | phage prohead protease, HK97 family                                    | N |
| Cluster_107804 | 38 | 13 | 9  | 10 | 81 | 57 | LI+NSI | 3.47 | 0.0623 | 0.0455 |             | methyltransferase domain protein                                       | N |
| Cluster_56014  | 38 | 13 | 9  | 10 | 81 | 57 | LI+NSI | 3.47 | 0.0623 | 0.0455 |             | hydantoinase/oxoprolinase family protein                               | N |
| Cluster_73988  | 38 | 13 | 9  | 10 | 81 | 57 | LI+NSI | 3.47 | 0.0623 | 0.0455 |             | aminoglycoside/hydroxyurea antibiotic resistance kinase family protein | N |
| Cluster_106126 | 8  | 0  | 39 | 23 | 17 | 0  | LI+NSI | 2.90 | 0.0887 | 0.0461 |             | conserved hypothetical protein                                         | N |
| Cluster_107544 | 8  | 0  | 39 | 23 | 17 | 0  | LI+NSI | 2.90 | 0.0887 | 0.0461 |             | tape measure domain protein                                            | N |
| Cluster_115308 | 8  | 0  | 39 | 23 | 17 | 0  | LI+NSI | 2.90 | 0.0887 | 0.0461 |             | helix-turn-helix domain protein                                        | Y |
| Cluster_117466 | 8  | 0  | 39 | 23 | 17 | 0  | LI+NSI | 2.90 | 0.0887 | 0.0461 |             | glycosyl transferase 2 family protein                                  | N |
| Cluster_124512 | 8  | 0  | 39 | 23 | 17 | 0  | LI+NSI | 2.90 | 0.0887 | 0.0461 |             | conserved hypothetical protein                                         | N |
| Cluster_281736 | 8  | 0  | 39 | 23 | 17 | 0  | LI+NSI | 2.90 | 0.0887 | 0.0461 |             | putative orf4 protein                                                  | N |
| Cluster_291295 | 8  | 0  | 39 | 23 | 17 | 0  | LI+NSI | 2.90 | 0.0887 | 0.0461 |             | rmlD substrate binding domain protein                                  | N |
| Cluster_71992  | 8  | 0  | 39 | 23 | 17 | 0  | LI+NSI | 2.90 | 0.0887 | 0.0461 |             | polysaccharide biosynthesis family protein                             | Y |
| Cluster_82368  | 8  | 0  | 39 | 23 | 17 | 0  | LI+NSI | 2.90 | 0.0887 | 0.0461 | <i>fliC</i> | flagellin                                                              | N |
| Cluster_120672 | 12 | 1  | 35 | 22 | 26 | 4  | LI+NSI | 3.29 | 0.0697 | 0.0476 |             | conserved hypothetical protein                                         | N |
| Cluster_124501 | 12 | 1  | 35 | 22 | 26 | 4  | LI+NSI | 3.29 | 0.0697 | 0.0476 |             | DNA N-6-adenine-methyltransferase family protein                       | N |
| Cluster_13383  | 12 | 1  | 35 | 22 | 26 | 4  | LI+NSI | 3.29 | 0.0697 | 0.0476 |             | conserved hypothetical protein                                         | N |
| Cluster_227359 | 12 | 1  | 35 | 22 | 26 | 4  | LI+NSI | 3.29 | 0.0697 | 0.0476 |             | conserved hypothetical protein                                         | N |
| Cluster_227360 | 12 | 1  | 35 | 22 | 26 | 4  | LI+NSI | 3.29 | 0.0697 | 0.0476 |             | putative membrane protein                                              | Y |
| Cluster_147010 | 5  | 7  | 42 | 16 | 11 | 30 | AI     | 2.98 | 0.0842 | 0.0498 |             | MULE transposase domain protein                                        | N |
| Cluster_147193 | 5  | 7  | 42 | 16 | 11 | 30 | AI     | 2.98 | 0.0842 | 0.0498 |             | resolvase, N terminal domain protein                                   | N |
| Cluster_297043 | 5  | 7  | 42 | 16 | 11 | 30 | AI     | 2.98 | 0.0842 | 0.0498 |             | hypothetical protein                                                   | N |
| Cluster_312558 | 5  | 7  | 42 | 16 | 11 | 30 | AI     | 2.98 | 0.0842 | 0.0498 |             | conserved hypothetical protein                                         | Y |
| Cluster_312602 | 5  | 7  | 42 | 16 | 11 | 30 | AI     | 2.98 | 0.0842 | 0.0498 |             | HNH endonuclease family protein                                        | N |
| Cluster_320753 | 5  | 7  | 42 | 16 | 11 | 30 | AI     | 2.98 | 0.0842 | 0.0498 |             | conserved hypothetical protein                                         | N |

Lethal (LI) vs. Non-Lethal (NSI+AI)

| Cluster ID     | No. of Genomes                |                              |    |        |      |          | Greater % | statistic | p-value | p-value | Gene ID                     | Predicted Protein Function                                                | Membrane or Secretion Domains |
|----------------|-------------------------------|------------------------------|----|--------|------|----------|-----------|-----------|---------|---------|-----------------------------|---------------------------------------------------------------------------|-------------------------------|
|                | Present (≥0.8) <sup>a,b</sup> | Absent (<0.8) <sup>a,b</sup> | LI | NSI+AI | % LI | % NSI+AI |           |           |         |         |                             |                                                                           |                               |
| Cluster_175606 | 6                             | 0                            | 18 | 46     | 25   | 0        | LI        | 9.59      | 0.0020  | 0.0010  | <i>fatA</i>                 | dTDP-6-deoxy-3,4-keto-hexulose isomerase                                  | N                             |
| Cluster_222636 | 6                             | 0                            | 18 | 46     | 25   | 0        | LI        | 9.59      | 0.0020  | 0.0010  | <i>rbfA</i>                 | glucose-1-phosphate thymidyltransferase                                   | N                             |
| Cluster_14414  | 10                            | 4                            | 14 | 42     | 42   | 9        | LI        | 8.75      | 0.0031  | 0.0031  |                             | conserved hypothetical protein                                            | N                             |
| Cluster_175608 | 5                             | 0                            | 19 | 46     | 21   | 0        | LI        | 7.42      | 0.0065  | 0.0035  | <i>degT/DnrJ/EryC1/StrS</i> | aminotransferase family protein                                           | N                             |
| Cluster_247403 | 5                             | 0                            | 19 | 46     | 21   | 0        | LI        | 7.42      | 0.0065  | 0.0035  |                             | glycosyl transferase 2 family protein                                     | N                             |
| Cluster_83926  | 5                             | 0                            | 19 | 46     | 21   | 0        | LI        | 7.42      | 0.0065  | 0.0035  |                             | acetyltransferase domain protein                                          | N                             |
| Cluster_252971 | 20                            | 22                           | 4  | 24     | 83   | 48       | LI        | 6.87      | 0.0088  | 0.0048  |                             | HNH endonuclease family protein                                           | N                             |
| Cluster_14423  | 10                            | 5                            | 14 | 41     | 42   | 11       | LI        | 7.15      | 0.0075  | 0.0051  |                             | conserved hypothetical protein                                            | N                             |
| Cluster_58277  | 10                            | 5                            | 14 | 41     | 42   | 11       | LI        | 7.15      | 0.0075  | 0.0051  |                             | helix-turn-helix, Pqs domain protein                                      | N                             |
| Cluster_236134 | 16                            | 14                           | 8  | 32     | 67   | 30       | LI        | 7.04      | 0.0080  | 0.0052  | <i>dhfrI</i>                | dihydrofolate reductase type 1                                            | N                             |
| Cluster_221922 | 6                             | 1                            | 18 | 45     | 25   | 2        | LI        | 6.77      | 0.0093  | 0.0055  |                             | glycosyl transferase family 2 domain protein                              | N                             |
| Cluster_247401 | 6                             | 1                            | 18 | 45     | 25   | 2        | LI        | 6.77      | 0.0093  | 0.0055  |                             | polysaccharide biosynthesis/export family protein                         | N                             |
| Cluster_83254  | 6                             | 1                            | 18 | 45     | 25   | 2        | LI        | 6.77      | 0.0093  | 0.0055  |                             | glycosyl transferases group 1 family protein                              | N                             |
| Cluster_83929  | 6                             | 1                            | 18 | 45     | 25   | 2        | LI        | 6.77      | 0.0093  | 0.0055  |                             | dTDP-glucose 4,6-dehydratase                                              | N                             |
| Cluster_84063  | 6                             | 1                            | 18 | 45     | 25   | 2        | LI        | 6.77      | 0.0093  | 0.0055  |                             | polysaccharide biosynthesis/export family protein                         | Y                             |
| Cluster_260984 | 13                            | 9                            | 11 | 37     | 54   | 20       | LI        | 7.23      | 0.0072  | 0.0059  | <i>traN</i>                 | type-F conjugative transfer system mating-pair stabilization protein TraN | Y                             |
| Cluster_106122 | 7                             | 2                            | 17 | 44     | 29   | 4        | LI        | 6.60      | 0.0102  | 0.0060  |                             | conserved hypothetical protein                                            | N                             |
| Cluster_115298 | 7                             | 2                            | 17 | 44     | 29   | 4        | LI        | 6.60      | 0.0102  | 0.0060  |                             | conserved hypothetical protein                                            | N                             |
| Cluster_240829 | 7                             | 2                            | 17 | 44     | 29   | 4        | LI        | 6.60      | 0.0102  | 0.0060  |                             | hypothetical protein                                                      | N                             |
| Cluster_261817 | 7                             | 2                            | 17 | 44     | 29   | 4        | LI        | 6.60      | 0.0102  | 0.0060  |                             | putative predicted protein                                                | N                             |
| Cluster_263945 | 7                             | 2                            | 17 | 44     | 29   | 4        | LI        | 6.60      | 0.0102  | 0.0060  |                             | conserved hypothetical protein                                            | N                             |
| Cluster_74193  | 7                             | 2                            | 17 | 44     | 29   | 4        | LI        | 6.60      | 0.0102  | 0.0060  |                             | phage major capsid E family protein                                       | N                             |
| Cluster_13383  | 9                             | 4                            | 15 | 42     | 38   | 9        | LI        | 6.85      | 0.0088  | 0.0073  |                             | conserved hypothetical protein                                            | N                             |
| Cluster_227359 | 9                             | 4                            | 15 | 42     | 38   | 9        | LI        | 6.85      | 0.0088  | 0.0073  |                             | conserved hypothetical protein                                            | N                             |
| Cluster_227360 | 9                             | 4                            | 15 | 42     | 38   | 9        | LI        | 6.85      | 0.0088  | 0.0073  |                             | putative membrane protein                                                 | Y                             |
| Cluster_222333 | 17                            | 17                           | 7  | 29     | 71   | 37       | LI        | 5.95      | 0.0147  | 0.0113  |                             | phage major capsid protein, HK97 family                                   | N                             |
| Cluster_59004  | 17                            | 17                           | 7  | 29     | 71   | 37       | LI        | 5.95      | 0.0147  | 0.0113  |                             | phage prohead protease, HK97 family                                       | N                             |
| Cluster_56014  | 22                            | 29                           | 2  | 17     | 92   | 63       | LI        | 5.17      | 0.0230  | 0.0114  |                             | hydantoinase/oxoprolinase family protein                                  | N                             |
| Cluster_108475 | 4                             | 0                            | 20 | 46     | 17   | 0        | LI        | 5.33      | 0.0209  | 0.0116  |                             | PLD-like domain protein                                                   | N                             |
| Cluster_284853 | 4                             | 0                            | 20 | 46     | 17   | 0        | LI        | 5.33      | 0.0209  | 0.0116  |                             | AAA domain protein                                                        | N                             |
| Cluster_54306  | 4                             | 0                            | 20 | 46     | 17   | 0        | LI        | 5.33      | 0.0209  | 0.0116  |                             | putative yAhA protein                                                     | N                             |
| Cluster_222331 | 16                            | 16                           | 8  | 30     | 67   | 35       | LI        | 5.24      | 0.0221  | 0.0133  |                             | phage portal protein, HK97 family                                         | N                             |
| Cluster_266615 | 16                            | 16                           | 8  | 30     | 67   | 35       | LI        | 5.24      | 0.0221  | 0.0133  |                             | putative yubO                                                             | N                             |
| Cluster_106126 | 6                             | 2                            | 18 | 44     | 25   | 4        | LI        | 4.76      | 0.0291  | 0.0165  |                             | conserved hypothetical protein                                            | N                             |
| Cluster_115308 | 6                             | 2                            | 18 | 44     | 25   | 4        | LI        | 4.76      | 0.0291  | 0.0165  |                             | helix-turn-helix domain protein                                           | Y                             |
| Cluster_312709 | 6                             | 2                            | 18 | 44     | 25   | 4        | LI        | 4.76      | 0.0291  | 0.0165  |                             | amino acid permease family protein                                        | Y                             |
| Cluster_82368  | 6                             | 2                            | 18 | 44     | 25   | 4        | LI        | 4.76      | 0.0291  | 0.0165  | <i>fliC</i>                 | flagellin                                                                 | N                             |
| Cluster_242060 | 8                             | 4                            | 16 | 42     | 33   | 9        | LI        | 5.12      | 0.0237  | 0.0170  |                             | hypothetical protein                                                      | N                             |
| Cluster_112366 | 4                             | 22                           | 20 | 24     | 17   | 48       | NSI+AI    | 5.29      | 0.0214  | 0.0179  |                             | mu-like prophage FlMu gp41 family protein                                 | N                             |
| Cluster_341980 | 22                            | 30                           | 2  | 16     | 92   | 65       | LI        | 4.47      | 0.0344  | 0.0207  |                             | conserved hypothetical protein                                            | Y                             |
| Cluster_107351 | 11                            | 8                            | 13 | 38     | 46   | 17       | LI        | 5.09      | 0.0240  | 0.0217  |                             | conserved hypothetical protein                                            | N                             |
| Cluster_312794 | 11                            | 8                            | 13 | 38     | 46   | 17       | LI        | 5.09      | 0.0240  | 0.0217  |                             | transposase DDE domain protein                                            | N                             |
| Cluster_43705  | 18                            | 20                           | 6  | 26     | 75   | 43       | LI        | 5.11      | 0.0238  | 0.0219  |                             | conserved hypothetical protein                                            | Y                             |
| Cluster_18413  | 18                            | 21                           | 6  | 25     | 75   | 46       | LI        | 4.38      | 0.0364  | 0.0238  |                             | resolvase, N terminal domain protein                                      | N                             |
| Cluster_312629 | 18                            | 21                           | 6  | 25     | 75   | 46       | LI        | 4.38      | 0.0364  | 0.0238  |                             | resolvase, N terminal domain protein                                      | N                             |
| Cluster_43605  | 18                            | 21                           | 6  | 25     | 75   | 46       | LI        | 4.38      | 0.0364  | 0.0238  |                             | HNH endonuclease family protein                                           | N                             |
| Cluster_346831 | 16                            | 17                           | 8  | 29     | 67   | 37       | LI        | 4.46      | 0.0347  | 0.0240  |                             | conserved hypothetical protein                                            | N                             |
| Cluster_98923  | 17                            | 19                           | 7  | 27     | 71   | 41       | LI        | 4.39      | 0.0362  | 0.0245  |                             | bacteriophage lysis family protein                                        | Y                             |
| Cluster_157448 | 1                             | 13                           | 23 | 33     | 4    | 28       | NSI+AI    | 4.32      | 0.0378  | 0.0250  | <i>espS</i>                 | putative t3SS effector protein EspS                                       | N                             |
| Cluster_27     |                               |                              |    |        |      |          |           |           |         |         |                             |                                                                           |                               |

|                |    |    |    |    |    |    |        |      |        |        |                                                                       |   |
|----------------|----|----|----|----|----|----|--------|------|--------|--------|-----------------------------------------------------------------------|---|
| Cluster_183140 | 9  | 6  | 15 | 40 | 38 | 13 | LI     | 4.24 | 0.0394 | 0.0300 | putative escherichia coli chi7122 chi7122 genomic chromosome, chi7122 | Y |
| Cluster_277010 | 20 | 26 | 4  | 20 | 83 | 57 | LI     | 3.91 | 0.0479 | 0.0339 | transposase DDE domain protein                                        | Y |
| Cluster_237277 | 12 | 11 | 12 | 35 | 50 | 24 | LI     | 3.75 | 0.0527 | 0.0348 | conserved hypothetical protein                                        | N |
| Cluster_262069 | 12 | 11 | 12 | 35 | 50 | 24 | LI     | 3.75 | 0.0527 | 0.0348 | istB-like ATP binding family protein                                  | N |
| Cluster_289981 | 12 | 11 | 12 | 35 | 50 | 24 | LI     | 3.75 | 0.0527 | 0.0348 | integrase core domain protein                                         | N |
| Cluster_14793  | 3  | 0  | 21 | 46 | 13 | 0  | LI     | 3.35 | 0.0673 | 0.0370 | conserved hypothetical protein                                        | N |
| Cluster_14794  | 3  | 0  | 21 | 46 | 13 | 0  | LI     | 3.35 | 0.0673 | 0.0370 | conserved hypothetical protein                                        | N |
| Cluster_14795  | 3  | 0  | 21 | 46 | 13 | 0  | LI     | 3.35 | 0.0673 | 0.0370 | conserved hypothetical protein                                        | N |
| Cluster_148543 | 3  | 0  | 21 | 46 | 13 | 0  | LI     | 3.35 | 0.0673 | 0.0370 | conserved hypothetical protein                                        | N |
| Cluster_148976 | 3  | 0  | 21 | 46 | 13 | 0  | LI     | 3.35 | 0.0673 | 0.0370 | conserved hypothetical protein                                        | N |
| Cluster_175609 | 3  | 0  | 21 | 46 | 13 | 0  | LI     | 3.35 | 0.0673 | 0.0370 | polysaccharide biosynthesis family protein                            | Y |
| Cluster_199286 | 3  | 0  | 21 | 46 | 13 | 0  | LI     | 3.35 | 0.0673 | 0.0370 | helix-turn-helix family protein                                       | N |
| Cluster_199287 | 3  | 0  | 21 | 46 | 13 | 0  | LI     | 3.35 | 0.0673 | 0.0370 | DNA adenine methylase family protein                                  | N |
| Cluster_222670 | 3  | 0  | 21 | 46 | 13 | 0  | LI     | 3.35 | 0.0673 | 0.0370 | conserved hypothetical protein                                        | Y |
| Cluster_222748 | 3  | 0  | 21 | 46 | 13 | 0  | LI     | 3.35 | 0.0673 | 0.0370 | putative csgAII                                                       | N |
| Cluster_24020  | 3  | 0  | 21 | 46 | 13 | 0  | LI     | 3.35 | 0.0673 | 0.0370 | DEAD/DEAH box helicase family protein                                 | N |
| Cluster_242402 | 3  | 0  | 21 | 46 | 13 | 0  | LI     | 3.35 | 0.0673 | 0.0370 | putative membrane protein                                             | Y |
| Cluster_24312  | 3  | 0  | 21 | 46 | 13 | 0  | LI     | 3.35 | 0.0673 | 0.0370 | hypothetical protein                                                  | N |
| Cluster_247314 | 3  | 0  | 21 | 46 | 13 | 0  | LI     | 3.35 | 0.0673 | 0.0370 | putative yaiB protein                                                 | N |
| Cluster_247315 | 3  | 0  | 21 | 46 | 13 | 0  | LI     | 3.35 | 0.0673 | 0.0370 | conserved hypothetical protein                                        | N |
| Cluster_247316 | 3  | 0  | 21 | 46 | 13 | 0  | LI     | 3.35 | 0.0673 | 0.0370 | dnaJ domain protein                                                   | N |
| Cluster_74241  | 3  | 0  | 21 | 46 | 13 | 0  | LI     | 3.35 | 0.0673 | 0.0370 | conserved hypothetical protein                                        | N |
| Cluster_74242  | 3  | 0  | 21 | 46 | 13 | 0  | LI     | 3.35 | 0.0673 | 0.0370 | conserved hypothetical protein                                        | N |
| Cluster_74244  | 3  | 0  | 21 | 46 | 13 | 0  | LI     | 3.35 | 0.0673 | 0.0370 | cobQ/CobB/MinD/ParA nucleotide binding domain protein                 | N |
| Cluster_74245  | 3  | 0  | 21 | 46 | 13 | 0  | LI     | 3.35 | 0.0673 | 0.0370 | hypothetical protein                                                  | N |
| Cluster_74246  | 3  | 0  | 21 | 46 | 13 | 0  | LI     | 3.35 | 0.0673 | 0.0370 | conserved hypothetical protein                                        | N |
| Cluster_74250  | 3  | 0  | 21 | 46 | 13 | 0  | LI     | 3.35 | 0.0673 | 0.0370 | toxin-antitoxin system, antitoxin component, Xre family               | N |
| Cluster_74251  | 3  | 0  | 21 | 46 | 13 | 0  | LI     | 3.35 | 0.0673 | 0.0370 | putative yajA protein                                                 | N |
| Cluster_74253  | 3  | 0  | 21 | 46 | 13 | 0  | LI     | 3.35 | 0.0673 | 0.0370 | conserved hypothetical protein                                        | N |
| Cluster_74254  | 3  | 0  | 21 | 46 | 13 | 0  | LI     | 3.35 | 0.0673 | 0.0370 | conserved hypothetical protein                                        | N |
| Cluster_83414  | 3  | 0  | 21 | 46 | 13 | 0  | LI     | 3.35 | 0.0673 | 0.0370 | conserved hypothetical protein                                        | N |
| Cluster_79151  | 22 | 31 | 2  | 15 | 92 | 67 | LI     | 3.82 | 0.0506 | 0.0380 | bundlin family protein                                                | Y |
| Cluster_262291 | 17 | 42 | 7  | 4  | 71 | 91 | NSI+AI | 3.56 | 0.0590 | 0.0381 | type III secretion, HrpO family protein                               | Y |
| Cluster_284866 | 7  | 4  | 17 | 42 | 29 | 9  | LI     | 3.56 | 0.0590 | 0.0381 | bacterial regulatory, tetR family protein                             | N |
| Cluster_317552 | 7  | 4  | 17 | 42 | 29 | 9  | LI     | 3.56 | 0.0590 | 0.0381 | conserved hypothetical protein                                        | N |
| Cluster_290675 | 5  | 22 | 19 | 24 | 21 | 48 | NSI+AI | 3.78 | 0.0519 | 0.0386 | phage late control gene D family protein                              | N |
| Cluster_305186 | 5  | 22 | 19 | 24 | 21 | 48 | NSI+AI | 3.78 | 0.0519 | 0.0386 | phage P2 GpU family protein                                           | Y |
| Cluster_83828  | 19 | 24 | 5  | 22 | 79 | 52 | LI     | 3.78 | 0.0519 | 0.0386 | conserved hypothetical protein                                        | N |
| Cluster_276547 | 13 | 13 | 11 | 33 | 54 | 28 | LI     | 3.49 | 0.0617 | 0.0406 | conserved hypothetical protein                                        | Y |
| Cluster_56841  | 13 | 13 | 11 | 33 | 54 | 28 | LI     | 3.49 | 0.0617 | 0.0406 | putative membrane protein                                             | Y |
| Cluster_207773 | 2  | 14 | 22 | 32 | 8  | 30 | NSI+AI | 3.21 | 0.0734 | 0.0410 | collagen triple helix repeat family protein                           | N |
| Cluster_261646 | 22 | 32 | 2  | 14 | 92 | 70 | LI     | 3.21 | 0.0734 | 0.0410 | phage/conjugal plasmid C-4 type zinc finger, TraR family protein      | N |
| Cluster_327168 | 18 | 22 | 6  | 24 | 75 | 48 | LI     | 3.71 | 0.0541 | 0.0418 | helix-turn-helix domain protein                                       | N |
| Cluster_214595 | 15 | 16 | 9  | 30 | 63 | 35 | LI     | 3.85 | 0.0497 | 0.0419 | phage gp6-like head-tail connector family protein                     | N |
| Cluster_243755 | 15 | 16 | 9  | 30 | 63 | 35 | LI     | 3.85 | 0.0497 | 0.0419 | ASCH domain protein                                                   | N |
| Cluster_317316 | 15 | 16 | 9  | 30 | 63 | 35 | LI     | 3.85 | 0.0497 | 0.0419 | putative bacteriophage protein                                        | N |
| Cluster_13363  | 5  | 2  | 19 | 44 | 21 | 4  | LI     | 3.11 | 0.0780 | 0.0422 | cytolethal distending toxin subunit B                                 | Y |
| Cluster_148189 | 5  | 2  | 19 | 44 | 21 | 4  | LI     | 3.11 | 0.0780 | 0.0422 | cytolethal distending toxin A/C family protein                        | Y |
| Cluster_183987 | 5  | 2  | 19 | 44 | 21 | 4  | LI     | 3.11 | 0.0780 | 0.0422 | insA N-terminal domain protein                                        | N |
| Cluster_183988 | 5  | 2  | 19 | 44 | 21 | 4  | LI     | 3.11 | 0.0780 | 0.0422 | putative transposase                                                  | N |
| Cluster_52075  | 5  | 2  | 19 | 44 | 21 | 4  | LI     | 3.11 | 0.0780 | 0.0422 | type I restriction modification DNA specificity domain protein        | N |
| Cluster_57949  | 5  | 2  | 19 | 44 | 21 | 4  | LI     | 3.11 | 0.0780 | 0.0422 | cytolethal distending toxin A/C family protein                        | Y |
| Cluster_108754 | 17 | 20 | 7  | 26 | 71 | 43 | LI     | 3.70 | 0.0543 | 0.0434 | phage terminase, small subunit, P27 family                            | N |
| Cluster_222329 | 17 | 20 | 7  | 26 | 71 | 43 | LI     | 3.70 | 0.0543 | 0.0434 | phage Terminase family protein                                        | N |
| Cluster_317314 | 17 | 20 | 7  | 26 | 71 | 43 | LI     | 3.70 | 0.0543 | 0.0434 | phage head-tail joining family protein                                | N |
| Cluster_104965 | 4  | 1  | 20 | 45 | 17 | 2  | LI     | 3.05 | 0.0808 | 0.0439 | transposase family protein                                            | N |
| Cluster_125142 | 4  | 1  | 20 | 45 | 17 | 2  | LI     | 3.05 | 0.0808 | 0.0439 | putative dNA transfer protein gp20                                    | N |
| Cluster_147687 | 4  | 1  | 20 | 45 | 17 | 2  | LI     | 3.05 | 0.0808 | 0.0439 | putative membrane protein                                             | Y |
| Cluster_182116 | 4  | 1  | 20 | 45 | 17 | 2  | LI     | 3.05 | 0.0808 | 0.0439 | conserved hypothetical protein                                        | N |
| Cluster_182709 | 4  | 1  | 20 | 45 | 17 | 2  | LI     | 3.05 | 0.0808 | 0.0439 | helix-turn-helix domain protein                                       | N |
| Cluster_183020 | 4  | 1  | 20 | 45 | 17 | 2  | LI     | 3.05 | 0.0808 | 0.0439 | hypothetical protein                                                  | N |
| Cluster_183381 | 4  | 1  | 20 | 45 | 17 | 2  | LI     | 3.05 | 0.0808 | 0.0439 | subtilase family protein                                              | N |
| Cluster_200360 | 4  | 1  | 20 | 45 | 17 | 2  | LI     | 3.05 | 0.0808 | 0.0439 | conserved hypothetical protein                                        | N |
| Cluster_242714 | 4  | 1  | 20 | 45 | 17 | 2  | LI     | 3.05 | 0.0808 | 0.0439 | conserved hypothetical protein                                        | Y |
| Cluster_285246 | 4  | 1  | 20 | 45 | 17 | 2  | LI     | 3.05 | 0.0808 | 0.0439 | conserved hypothetical protein                                        | N |
| Cluster_28951  | 4  | 1  | 20 | 45 | 17 | 2  | LI     | 3.05 | 0.0808 | 0.0439 | hypothetical protein                                                  | N |
| Cluster_70300  | 4  | 1  | 20 | 45 | 17 | 2  | LI     | 3.05 | 0.0808 | 0.0439 | conserved hypothetical protein                                        | N |
| Cluster_167436 | 20 | 45 | 4  | 1  | 83 | 98 | NSI+AI | 3.05 | 0.0808 | 0.0439 | tail attachment protein                                               | N |
| Cluster_217327 | 20 | 45 | 4  | 1  | 83 | 98 | NSI+AI | 3.05 | 0.0808 | 0.0439 | head decoration protein                                               | N |
| Cluster_188256 | 0  | 8  | 24 | 38 | 0  | 17 | NSI+AI | 3.15 | 0.0759 | 0.0442 | conserved hypothetical protein                                        | Y |
| Cluster_3723   | 0  | 8  | 24 | 38 | 0  | 17 | NSI+AI | 3.15 | 0.0759 | 0.0442 | conserved hypothetical protein                                        | N |
| Cluster_8046   | 0  | 8  | 24 | 38 | 0  | 17 | NSI+AI | 3.15 | 0.0759 | 0.0442 | hypothetical protein                                                  | N |
| Cluster_118562 | 8  | 5  | 16 | 41 | 33 | 11 | LI     | 3.88 | 0.0488 | 0.0462 | istB-like ATP binding family protein                                  | N |
| Cluster_124501 | 8  | 5  | 16 | 41 | 33 | 11 | LI     | 3.88 | 0.0488 | 0.0462 | DNA N-6-adenine-methyltransferase family protein                      | N |
| Cluster_316740 | 21 | 29 | 3  | 17 | 88 | 63 | LI     | 3.50 | 0.0613 | 0.0496 | conserved hypothetical protein                                        | Y |
| Cluster_99069  | 21 | 29 | 3  | 17 | 88 | 63 | LI     | 3.50 | 0.0613 | 0.0496 | haemolysin expression modulating family protein                       | N |

<sup>a</sup>Genes were grouped into gene clusters using an "inclusive" clustering threshold of  $\geq 80\%$  nucleotide identity.

<sup>b</sup>Gene clusters identified as "present" have a TBLASTN LS-BSR  $\geq 0.8$ , while those that are "absent" have a TBLASTN LS-BSR  $< 0.8$ .

<sup>c</sup>Clinical outcomes are classified as lethal (LI), non-lethal symptomatic (NSI), and asymptomatic (AI).

**Table S9.** Genes identified by LS-BSR that are significantly correlated with symptomatic, asymptomatic, lethal, or non-lethal clinical outcomes for the 61 typical EPEC genomes analyzed using an inclusive clustering threshold

| Cluster ID     | No. of Genomes                |    |                              |    |                                          |      |           | Symptomatic (LI+NSI) vs. Asymptomatic (AI) |         |                     | Gene ID                                                                            | Predicted Protein Function | Membrane or Secretion Domains |
|----------------|-------------------------------|----|------------------------------|----|------------------------------------------|------|-----------|--------------------------------------------|---------|---------------------|------------------------------------------------------------------------------------|----------------------------|-------------------------------|
|                | Present (≥0.8) <sup>a,b</sup> |    | Absent (<0.8) <sup>a,b</sup> |    | Percentage of Genomes Containing Cluster |      |           | Chi-squared test                           |         | Fisher's exact test |                                                                                    |                            |                               |
|                | LI+NSI                        | AI | LI+NSI                       | AI | % LI+NSI                                 | % AI | Greater % | statistic                                  | p-value | p-value             |                                                                                    |                            |                               |
| Cluster_168916 | 0                             | 5  | 44                           | 12 | 0                                        | 29   | AI        | 10.46                                      | 0.0012  | 0.0010              | nucleoside transporter family protein                                              | Y                          |                               |
| Cluster_167317 | 43                            | 11 | 1                            | 6  | 98                                       | 65   | LI+NSI    | 10.11                                      | 0.0015  | 0.0013              | intergenic-region protein                                                          | N                          |                               |
| Cluster_297449 | 4                             | 8  | 40                           | 9  | 9                                        | 47   | AI        | 8.91                                       | 0.0028  | 0.0021              | conserved hypothetical protein                                                     | N                          |                               |
| Cluster_11587  | 6                             | 9  | 38                           | 8  | 14                                       | 53   | AI        | 8.21                                       | 0.0042  | 0.0028              | transposase family protein                                                         | Y                          |                               |
| Cluster_169965 | 8                             | 10 | 36                           | 7  | 18                                       | 59   | AI        | 7.88                                       | 0.0050  | 0.0038              | ogr/Delta-like zinc finger family protein                                          | N                          |                               |
| Cluster_200452 | 8                             | 10 | 36                           | 7  | 18                                       | 59   | AI        | 7.88                                       | 0.0050  | 0.0038              | putative prophage protein                                                          | N                          |                               |
| Cluster_200454 | 8                             | 10 | 36                           | 7  | 18                                       | 59   | AI        | 7.88                                       | 0.0050  | 0.0038              | putative phage immunity repressor protein                                          | N                          |                               |
| Cluster_271578 | 8                             | 10 | 36                           | 7  | 18                                       | 59   | AI        | 7.88                                       | 0.0050  | 0.0038              | conserved hypothetical protein                                                     | N                          |                               |
| Cluster_316955 | 8                             | 10 | 36                           | 7  | 18                                       | 59   | AI        | 7.88                                       | 0.0050  | 0.0038              | helix-turn-helix domain protein                                                    | N                          |                               |
| Cluster_63459  | 8                             | 10 | 36                           | 7  | 18                                       | 59   | AI        | 7.88                                       | 0.0050  | 0.0038              | putative derepression protein                                                      | N                          |                               |
| Cluster_34159  | 23                            | 2  | 21                           | 15 | 52                                       | 12   | LI+NSI    | 6.73                                       | 0.0095  | 0.0041              | conserved hypothetical protein                                                     | N                          |                               |
| Cluster_167315 | 42                            | 11 | 2                            | 6  | 95                                       | 65   | LI+NSI    | 7.66                                       | 0.0057  | 0.0043              | conserved hypothetical protein                                                     | N                          |                               |
| Cluster_172125 | 0                             | 4  | 44                           | 13 | 0                                        | 24   | AI        | 7.57                                       | 0.0059  | 0.0046              | conserved hypothetical protein                                                     | Y                          |                               |
| Cluster_203531 | 0                             | 4  | 44                           | 13 | 0                                        | 24   | AI        | 7.57                                       | 0.0059  | 0.0046              | conserved hypothetical protein                                                     | Y                          |                               |
| Cluster_206540 | 0                             | 4  | 44                           | 13 | 0                                        | 24   | AI        | 7.57                                       | 0.0059  | 0.0046              | nucleoside 2-deoxyribosyltransferase family protein                                | N                          |                               |
| Cluster_79228  | 1                             | 5  | 43                           | 12 | 2                                        | 29   | AI        | 7.35                                       | 0.0067  | 0.0051              | hNH endonuclease family protein                                                    | N                          |                               |
| Cluster_151023 | 10                            | 11 | 34                           | 6  | 23                                       | 65   | AI        | 7.80                                       | 0.0052  | 0.0055              | conserved hypothetical protein                                                     | Y                          |                               |
| Cluster_320510 | 10                            | 11 | 34                           | 6  | 23                                       | 65   | AI        | 7.80                                       | 0.0052  | 0.0055              | conserved hypothetical protein                                                     | Y                          |                               |
| Cluster_322330 | 10                            | 11 | 34                           | 6  | 23                                       | 65   | AI        | 7.80                                       | 0.0052  | 0.0055              | conserved hypothetical protein                                                     | N                          |                               |
| Cluster_57681  | 10                            | 11 | 34                           | 6  | 23                                       | 65   | AI        | 7.80                                       | 0.0052  | 0.0055              | conserved hypothetical protein                                                     | N                          |                               |
| Cluster_147543 | 14                            | 0  | 30                           | 17 | 32                                       | 0    | LI+NSI    | 5.34                                       | 0.0209  | 0.0064              | putative yfda                                                                      | Y                          |                               |
| Cluster_322352 | 12                            | 11 | 32                           | 6  | 27                                       | 65   | AI        | 5.81                                       | 0.0159  | 0.0094              | conserved hypothetical protein                                                     | N                          |                               |
| Cluster_307808 | 3                             | 6  | 41                           | 11 | 7                                        | 35   | AI        | 5.80                                       | 0.0180  | 0.0106              | conserved hypothetical protein                                                     | N                          |                               |
| Cluster_309171 | 17                            | 13 | 27                           | 4  | 39                                       | 76   | AI        | 5.59                                       | 0.0181  | 0.0106              | outer membrane transport family protein                                            | Y                          |                               |
| Cluster_225859 | 8                             | 9  | 36                           | 8  | 18                                       | 53   | AI        | 5.74                                       | 0.0166  | 0.0109              | putative glyco3, capsid size determination protein Sid                             | N                          |                               |
| Cluster_111596 | 20                            | 14 | 24                           | 3  | 45                                       | 82   | AI        | 5.35                                       | 0.0207  | 0.0109              | ethanolamine utilization EutN/carboxysome family protein                           | N                          |                               |
| Cluster_118076 | 20                            | 14 | 24                           | 3  | 45                                       | 82   | AI        | 5.35                                       | 0.0207  | 0.0109              | shell protein                                                                      | N                          |                               |
| Cluster_127742 | 20                            | 14 | 24                           | 3  | 45                                       | 82   | AI        | 5.35                                       | 0.0207  | 0.0109              | dehydratase medium subunit                                                         | N                          |                               |
| Cluster_127750 | 20                            | 14 | 24                           | 3  | 45                                       | 82   | AI        | 5.35                                       | 0.0207  | 0.0109              | iron-containing alcohol dehydrogenase family protein                               | N                          |                               |
| Cluster_166468 | 20                            | 14 | 24                           | 3  | 45                                       | 82   | AI        | 5.35                                       | 0.0207  | 0.0109              | cob(I)alamin adenosyltransferase                                                   | N                          |                               |
| Cluster_166473 | 20                            | 14 | 24                           | 3  | 45                                       | 82   | AI        | 5.35                                       | 0.0207  | 0.0109              | propanediol utilization protein PduA                                               | N                          |                               |
| Cluster_186173 | 20                            | 14 | 24                           | 3  | 45                                       | 82   | AI        | 5.35                                       | 0.0207  | 0.0109              | BMC domain protein                                                                 | Y                          |                               |
| Cluster_196208 | 20                            | 14 | 24                           | 3  | 45                                       | 82   | AI        | 5.35                                       | 0.0207  | 0.0109              | ethanolamine utilization protein, EutP                                             | N                          |                               |
| Cluster_196209 | 20                            | 14 | 24                           | 3  | 45                                       | 82   | AI        | 5.35                                       | 0.0207  | 0.0109              | propanediol utilization protein PduU                                               | N                          |                               |
| Cluster_196229 | 20                            | 14 | 24                           | 3  | 45                                       | 82   | AI        | 5.35                                       | 0.0207  | 0.0109              | putative cobalamin biosynthesis protein CbiG                                       | Y                          |                               |
| Cluster_225773 | 20                            | 14 | 24                           | 3  | 45                                       | 82   | AI        | 5.35                                       | 0.0207  | 0.0109              | propanediol dehydratase medium subunit                                             | N                          |                               |
| Cluster_230774 | 20                            | 14 | 24                           | 3  | 45                                       | 82   | AI        | 5.35                                       | 0.0207  | 0.0109              | phosphate propanoyltransferase                                                     | N                          |                               |
| Cluster_259784 | 20                            | 14 | 24                           | 3  | 45                                       | 82   | AI        | 5.35                                       | 0.0207  | 0.0109              | propanediol utilization protein PduA                                               | N                          |                               |
| Cluster_259786 | 20                            | 14 | 24                           | 3  | 45                                       | 82   | AI        | 5.35                                       | 0.0207  | 0.0109              | propanediol dehydratase large subunit                                              | N                          |                               |
| Cluster_259788 | 20                            | 14 | 24                           | 3  | 45                                       | 82   | AI        | 5.35                                       | 0.0207  | 0.0109              | propanediol dehydratase small subunit                                              | N                          |                               |
| Cluster_265851 | 20                            | 14 | 24                           | 3  | 45                                       | 82   | AI        | 5.35                                       | 0.0207  | 0.0109              | BMC domain protein                                                                 | N                          |                               |
| Cluster_265865 | 20                            | 14 | 24                           | 3  | 45                                       | 82   | AI        | 5.35                                       | 0.0207  | 0.0109              | electron transport complex, RnfABCDGE type, C subunit                              | N                          |                               |
| Cluster_310627 | 20                            | 14 | 24                           | 3  | 45                                       | 82   | AI        | 5.35                                       | 0.0207  | 0.0109              | helix-turn-helix domain protein                                                    | N                          |                               |
| Cluster_321136 | 20                            | 14 | 24                           | 3  | 45                                       | 82   | AI        | 5.35                                       | 0.0207  | 0.0109              | MIP channel family protein                                                         | Y                          |                               |
| Cluster_221927 | 13                            | 0  | 31                           | 17 | 30                                       | 0    | LI+NSI    | 4.74                                       | 0.0294  | 0.0125              | phage Tail Collar domain protein                                                   | Y                          |                               |
| Cluster_107351 | 17                            | 1  | 27                           | 16 | 39                                       | 6    | LI+NSI    | 4.85                                       | 0.0277  | 0.0127              | conserved hypothetical protein                                                     | N                          |                               |
| Cluster_312794 | 17                            | 1  | 27                           | 16 | 39                                       | 6    | LI+NSI    | 4.85                                       | 0.0277  | 0.0127              | transposase DDE domain protein                                                     | N                          |                               |
| Cluster_11511  | 6                             | 8  | 38                           | 9  | 14                                       | 47   | AI        | 5.97                                       | 0.0145  | 0.0140              | putative exported protein                                                          | Y                          |                               |
| Cluster_178309 | 38                            | 9  | 6                            | 8  | 86                                       | 53   | LI+NSI    | 5.97                                       | 0.0145  | 0.0140              | conserved hypothetical protein                                                     | N                          |                               |
| Cluster_222426 | 12                            | 0  | 32                           | 17 | 27                                       | 0    | LI+NSI    | 4.17                                       | 0.0410  | 0.0142              | putative membrane protein                                                          | Y                          |                               |
| Cluster_334902 | 12                            | 0  | 32                           | 17 | 27                                       | 0    | LI+NSI    | 4.17                                       | 0.0410  | 0.0142              | conserved hypothetical protein                                                     | N                          |                               |
| Cluster_97528  | 12                            | 0  | 32                           | 17 | 27                                       | 0    | LI+NSI    | 4.17                                       | 0.0410  | 0.0142              | ead/Ea22-like family protein                                                       | N                          |                               |
| Cluster_267235 | 21                            | 2  | 23                           | 15 | 48                                       | 12   | LI+NSI    | 5.31                                       | 0.0212  | 0.0167              | hypothetical protein                                                               | N                          |                               |
| Cluster_262069 | 20                            | 2  | 24                           | 15 | 45                                       | 12   | LI+NSI    | 4.66                                       | 0.0308  | 0.0175              | istB-like ATP binding family protein                                               | N                          |                               |
| Cluster_289981 | 20                            | 2  | 24                           | 15 | 45                                       | 12   | LI+NSI    | 4.66                                       | 0.0308  | 0.0175              | integrase core domain protein                                                      | N                          |                               |
| Cluster_296985 | 13                            | 11 | 31                           | 6  | 30                                       | 65   | AI        | 4.96                                       | 0.0259  | 0.0188              | phage tail family protein                                                          | N                          |                               |
| Cluster_171495 | 0                             | 3  | 44                           | 14 | 0                                        | 18   | AI        | 4.83                                       | 0.0280  | 0.0189              | conserved hypothetical protein                                                     | N                          |                               |
| Cluster_171552 | 0                             | 3  | 44                           | 14 | 0                                        | 18   | AI        | 4.83                                       | 0.0280  | 0.0189              | binding-protein-dependent transport system inner membrane component family protein | Y                          |                               |
| Cluster_171553 | 0                             | 3  | 44                           | 14 | 0                                        | 18   | AI        | 4.83                                       | 0.0280  | 0.0189              | binding-protein-dependent transport system inner membrane component family protein | Y                          |                               |
| Cluster_171556 | 0                             | 3  | 44                           | 14 | 0                                        | 18   | AI        | 4.83                                       | 0.0280  | 0.0189              | ROK family protein                                                                 | N                          |                               |
| Cluster_206057 | 0                             | 3  | 44                           | 14 | 0                                        | 18   | AI        | 4.83                                       | 0.0280  | 0.0189              | bacterial extracellular solute-binding family protein                              | Y                          |                               |
| Cluster_206061 | 0                             | 3  | 44                           | 14 | 0                                        | 18   | AI        | 4.83                                       | 0.0280  | 0.0189              | glycerophosphoryl diester phosphodiesterase family protein                         | N                          |                               |
| Cluster_207740 | 0                             | 3  | 44                           | 14 | 0                                        | 18   | AI        | 4.83                                       | 0.0280  | 0.0189              | caudovirales tail fibre assembly family protein                                    | N                          |                               |
| Cluster_207848 | 0                             | 3  | 44                           | 14 | 0                                        | 18   | AI        | 4.83                                       | 0.0280  | 0.0189              | conserved hypothetical protein                                                     | N                          |                               |
| Cluster_297563 | 0                             | 3  | 44                           | 14 | 0                                        | 18   | AI        | 4.83                                       | 0.0280  | 0.0189              | conserved hypothetical protein                                                     | N                          |                               |
| Cluster_319815 | 0                             | 3  | 44                           | 14 | 0                                        | 18   | AI        | 4.83                                       | 0.0280  | 0.0189              | putative predicted protein                                                         | N                          |                               |
| Cluster_319816 | 0                             | 3  | 44                           | 14 | 0                                        | 18   | AI        | 4.83                                       | 0.0280  | 0.0189              | conserved hypothetical protein                                                     | Y                          |                               |
| Cluster_321372 | 0                             | 3  | 44                           | 14 | 0                                        | 18   | AI        | 4.83                                       | 0.0280  | 0.0189              | ABC transporter family protein                                                     | N                          |                               |
| Cluster_94403  | 0                             | 3  | 44                           | 14 | 0                                        | 18   | AI        | 4.83                                       | 0.0280  | 0.0189              | conserved hypothetical protein                                                     | N                          |                               |
| Cluster_147776 | 7                             | 8  | 37                           | 9  | 16                                       | 47   | AI        | 4.85                                       | 0.0277  | 0.0192              | conserved hypothetical protein                                                     | N                          |                               |
| Cluster_225861 | 7                             | 8  | 37                           | 9  | 16                                       | 47   | AI        | 4.85                                       | 0.0277  | 0.0192              | polarity suppression protein                                                       | N                          |                               |
| Cluster_232396 | 7                             | 8  | 37                           | 9  | 16                                       | 47   | AI        | 4.85                                       | 0.0277  | 0.0192              | putative dNA-binding helix-turn-helix protein                                      | N                          |                               |
| Cluster_83718  | 15                            | 12 | 29                           | 5  | 34                                       | 71   | AI        | 5.22                                       | 0.0223  | 0.0199              | traN type-F conjugative transfer system mating-pair stabilization protein TraN     | Y                          |                               |
| Cluster_297448 | 21                            | 14 | 23                           | 3  | 48                                       | 82   | AI        | 4.68                                       | 0.0305  | 0.0204              | conserved hypothetical protein                                                     | N                          |                               |
| Cluster_82579  | 21                            | 14 | 23                           | 3  | 48                                       | 82   | AI        | 4.68                                       | 0.0305  | 0.0204              | conserved hypothetical protein                                                     | N                          |                               |
| Cluster_222333 | 26                            | 4  | 18                           | 13 | 59                                       | 24   | LI+NSI    | 4.86                                       | 0.0274  | 0.0212              | putative non-LEE-encoded effector EspJ                                             | N                          |                               |
| Cluster_59004  | 26                            | 4  | 18                           | 13 | 59                                       | 24   | LI+NSI    | 4.86                                       | 0.0274  | 0.0212              | phage major capsid protein, HK97 family                                            | N                          |                               |
| Cluster_80973  | 26                            | 4  | 18                           | 13 | 59                                       | 24   | LI+NSI    | 4.86                                       | 0.0274  | 0.0212              | phage prohead protease, HK97 family                                                | N                          |                               |
| Cluster_53910  | 4                             | 6  | 40                           | 11 | 9                                        | 35   | AI        | 4.38                                       | 0.0364  | 0.0218              | phage integrase family protein                                                     | N                          |                               |
| Cluster_67359  | 4                             | 6  | 40                           | 11 | 9                                        | 35   | AI        | 4.38                                       | 0.0364  | 0.0218              | prophage CP4-57 integrase                                                          | N                          |                               |
| Cluster_14627  | 14                            | 11 | 30                           | 6  | 32                                       | 65   | AI        | 4.21                                       | 0.0402  | 0.0239              | cysteine protease, YopT-type domain protein                                        | N                          |                               |
| Cluster_340924 | 28                            | 16 | 16                           | 1  | 64                                       | 94   | AI        | 4.25                                       | 0.0392  | 0.0241              | ribbon-helix-helix, copG family protein                                            | N                          |                               |
| Cluster_337159 | 25                            | 4  | 19                           | 13 | 57                                       | 24   | LI+NSI    | 4.20                                       | 0.0405  | 0.0244              | conserved hypothetical protein                                                     | N                          |                               |
| Cluster_312602 | 5                             | 7  | 39                           | 10 | 11                                       | 41   | AI        | 5.14                                       | 0.0234  | 0.0263              | HNH endonuclease family protein                                                    | N                          |                               |
| Cluster_209146 | 15                            | 1  | 29                           | 16 | 34                                       | 6    | LI+NSI    | 3.69                                       | 0.0547  | 0.0267              | shET2 enterotoxin, N-terminal region family protein                                | N                          |                               |
| Cluster_263620 | 15                            | 1  | 29                           | 16 | 34                                       | 6    | LI+NSI    | 3.69                                       | 0.0547  | 0.0267              | transposase DDE domain protein                                                     | N                          |                               |
| Cluster_285156 | 15                            | 1  | 29                           | 16 | 34                                       | 6    | LI+NSI    | 3.69                                       | 0.0547  | 0.0267              | sepZ family protein                                                                | Y                          |                               |
| Cluster_72088  | 15                            | 1  | 29                           | 16 | 34                                       | 6    | LI+NSI    | 3.69                                       | 0.0547  | 0.0267              | glycosyl transferases group 1 family protein                                       | Y                          |                               |
| Cluster_157448 | 3                             | 5  | 41                           | 12 | 7                                        | 29   | AI        | 3.69                                       | 0.0548  | 0.0321              | putative t3SS effector protein EspS                                                | N                          |                               |
| Cluster_303768 | 3                             | 5  | 41                           | 12 | 7                                        | 29   | AI        | 3.69                                       | 0.0548  | 0.0321              | putative regulatory protein N                                                      | N                          |                               |
| Cluster_78756  | 3                             | 5  | 41                           | 12 | 7                                        | 29   | AI        | 3.69                                       | 0.0548  | 0.0321              | prophage CP4-57 regulatory family protein                                          | N                          |                               |
| Cluster_132984 | 6                             | 7  | 38                           | 10 | 14                                       | 41   | AI        | 4.03                                       | 0.0448  | 0.0334              | traP family protein                                                                | Y                          |                               |
| Cluster_14370  | 6                             | 7  | 38                           | 10 | 14                                       | 41   | AI        | 4.03                                       | 0.0448  | 0.0334              | insertion element 4 transposase N-terminal family protein                          | Y                          |                               |

| Cluster        | LI | NSI+AI | LI | NSI+AI | % LI | % NSI+AI | Greater % | statistic | p-value | Fisher's exact test | Gene ID    | Predicted Protein Function                                       | Membrane or Secretion Domains |
|----------------|----|--------|----|--------|------|----------|-----------|-----------|---------|---------------------|------------|------------------------------------------------------------------|-------------------------------|
| Cluster_327168 | 32 | 7      | 12 | 10     | 73   | 41       | LI+NSI    | 4.01      | 0.0451  | 0.0360              |            | helix-turn-helix domain protein                                  | N                             |
| Cluster_54451  | 12 | 10     | 32 | 7      | 27   | 59       | AI        | 4.01      | 0.0451  | 0.0360              |            | conserved hypothetical protein                                   | N                             |
| Cluster_54644  | 22 | 14     | 22 | 3      | 50   | 82       | AI        | 4.05      | 0.0441  | 0.0402              |            | conserved hypothetical protein                                   | N                             |
| Cluster_118816 | 21 | 3      | 23 | 14     | 48   | 18       | LI+NSI    | 3.47      | 0.0623  | 0.0418              |            | conserved hypothetical protein                                   | Y                             |
| Cluster_132520 | 13 | 10     | 31 | 7      | 30   | 59       | AI        | 3.32      | 0.0686  | 0.0436              |            | phage capsid scaffolding (GPO) serine peptidase family protein   | N                             |
| Cluster_252971 | 31 | 7      | 13 | 10     | 70   | 41       | LI+NSI    | 3.32      | 0.0686  | 0.0436              |            | HNH endonuclease family protein                                  | N                             |
| Cluster_303767 | 13 | 10     | 31 | 7      | 30   | 59       | AI        | 3.32      | 0.0686  | 0.0436              |            | repressor protein CI                                             | N                             |
| Cluster_116275 | 15 | 11     | 29 | 6      | 34   | 65       | AI        | 3.53      | 0.0602  | 0.0437              |            | espF repeat family protein                                       | Y                             |
| Cluster_39077  | 29 | 6      | 15 | 11     | 66   | 35       | LI+NSI    | 3.53      | 0.0602  | 0.0437              |            | conserved hypothetical protein                                   | N                             |
| Cluster_43605  | 29 | 6      | 15 | 11     | 66   | 35       | LI+NSI    | 3.53      | 0.0602  | 0.0437              |            | HNH endonuclease family protein                                  | N                             |
| Cluster_196213 | 20 | 13     | 24 | 4      | 45   | 76       | AI        | 3.58      | 0.0584  | 0.0444              |            | aldehyde dehydrogenase family protein                            | N                             |
| Cluster_214595 | 24 | 4      | 20 | 13     | 55   | 24       | LI+NSI    | 3.58      | 0.0584  | 0.0444              |            | phage gp6-like head-tail connector family protein                | N                             |
| Cluster_222331 | 24 | 4      | 20 | 13     | 55   | 24       | LI+NSI    | 3.58      | 0.0584  | 0.0444              |            | phage portal protein, HK97 family                                | N                             |
| Cluster_236053 | 24 | 4      | 20 | 13     | 55   | 24       | LI+NSI    | 3.58      | 0.0584  | 0.0444              |            | conserved hypothetical protein                                   | N                             |
| Cluster_317316 | 24 | 4      | 20 | 13     | 55   | 24       | LI+NSI    | 3.58      | 0.0584  | 0.0444              |            | putative bacteriophage protein                                   | N                             |
| Cluster_72658  | 20 | 13     | 24 | 4      | 45   | 76       | AI        | 3.58      | 0.0584  | 0.0444              |            | putative propanediol utilization protein                         | N                             |
| Cluster_74298  | 24 | 4      | 20 | 13     | 55   | 24       | LI+NSI    | 3.58      | 0.0584  | 0.0444              |            | traP family protein                                              | Y                             |
| Cluster_60983  | 2  | 4      | 42 | 13     | 5    | 24       | AI        | 3.07      | 0.0796  | 0.0457              |            | conserved hypothetical protein                                   | N                             |
| Cluster_128383 | 14 | 1      | 30 | 16     | 32   | 6        | LI+NSI    | 3.16      | 0.0755  | 0.0469              |            | conserved hypothetical protein                                   | N                             |
| Cluster_128390 | 14 | 1      | 30 | 16     | 32   | 6        | LI+NSI    | 3.16      | 0.0755  | 0.0469              |            | viral (Super1) RNA helicase family protein                       | N                             |
| Cluster_164940 | 14 | 1      | 30 | 16     | 32   | 6        | LI+NSI    | 3.16      | 0.0755  | 0.0469              |            | AAA domain protein                                               | N                             |
| Cluster_276697 | 14 | 1      | 30 | 16     | 32   | 6        | LI+NSI    | 3.16      | 0.0755  | 0.0469              |            | conserved hypothetical protein                                   | N                             |
| Cluster_291791 | 14 | 1      | 30 | 16     | 32   | 6        | LI+NSI    | 3.16      | 0.0755  | 0.0469              |            | plasmid conjugative transfer entry exclusion TraS family protein | Y                             |
| Cluster_291795 | 14 | 1      | 30 | 16     | 32   | 6        | LI+NSI    | 3.16      | 0.0755  | 0.0469              |            | putative acetyltransferase                                       | Y                             |
| Cluster_59092  | 14 | 1      | 30 | 16     | 32   | 6        | LI+NSI    | 3.16      | 0.0755  | 0.0469              |            | conserved hypothetical protein                                   | N                             |
| Cluster_73497  | 14 | 1      | 30 | 16     | 32   | 6        | LI+NSI    | 3.16      | 0.0755  | 0.0469              |            | conserved hypothetical protein                                   | N                             |
| Cluster_98944  | 14 | 1      | 30 | 16     | 32   | 6        | LI+NSI    | 3.16      | 0.0755  | 0.0469              |            | conserved hypothetical protein                                   | N                             |
| Cluster_56999  | 7  | 7      | 37 | 10     | 16   | 41       | AI        | 3.11      | 0.0776  | 0.0471              |            | putative P4-specific DNA primase                                 | N                             |
| Cluster_107804 | 36 | 9      | 8  | 8      | 82   | 53       | LI+NSI    | 3.90      | 0.0484  | 0.0479              |            | methyltransferase domain protein                                 | N                             |
| Cluster_227577 | 8  | 8      | 36 | 9      | 18   | 47       | AI        | 3.90      | 0.0484  | 0.0479              | <i>ssb</i> | single-stranded DNA-binding protein                              | N                             |
| Cluster_159210 | 26 | 5      | 18 | 12     | 59   | 29       | LI+NSI    | 3.22      | 0.0729  | 0.0486              |            | conserved hypothetical protein                                   | N                             |
| Cluster_252361 | 26 | 5      | 18 | 12     | 59   | 29       | LI+NSI    | 3.22      | 0.0729  | 0.0486              |            | putative antirestriction protein                                 | N                             |
| Cluster_302692 | 26 | 5      | 18 | 12     | 59   | 29       | LI+NSI    | 3.22      | 0.0729  | 0.0486              |            | hypothetical protein                                             | N                             |
| Cluster_346831 | 26 | 5      | 18 | 12     | 59   | 29       | LI+NSI    | 3.22      | 0.0729  | 0.0486              |            | conserved hypothetical protein                                   | N                             |
| Cluster_84849  | 26 | 5      | 18 | 12     | 59   | 29       | LI+NSI    | 3.22      | 0.0729  | 0.0486              |            | conserved hypothetical protein                                   | N                             |
| Cluster_127453 | 10 | 0      | 34 | 17     | 23   | 0        | LI+NSI    | 3.11      | 0.0777  | 0.0493              |            | conserved hypothetical protein                                   | N                             |
| Cluster_139135 | 10 | 0      | 34 | 17     | 23   | 0        | LI+NSI    | 3.11      | 0.0777  | 0.0493              |            | putative pyridoxamine 5-phosphate-dependent dehydrase            | N                             |
| Cluster_221116 | 10 | 0      | 34 | 17     | 23   | 0        | LI+NSI    | 3.11      | 0.0777  | 0.0493              |            | hypothetical protein                                             | N                             |
| Cluster_232949 | 10 | 0      | 34 | 17     | 23   | 0        | LI+NSI    | 3.11      | 0.0777  | 0.0493              |            | P22AR C-terminal domain protein                                  | Y                             |
| Cluster_262291 | 34 | 17     | 10 | 0      | 77   | 100      | AI        | 3.11      | 0.0777  | 0.0493              |            | type III secretion , HrpO family protein                         | N                             |
| Cluster_291294 | 10 | 0      | 34 | 17     | 23   | 0        | LI+NSI    | 3.11      | 0.0777  | 0.0493              |            | putative pyridoxamine 5-phosphate-dependent dehydrase            | Y                             |
| Cluster_95058  | 10 | 0      | 34 | 17     | 23   | 0        | LI+NSI    | 3.11      | 0.0777  | 0.0493              |            | putative antirepressor protein                                   | N                             |

## Lethal (LI) vs. Non-Lethal (NSI+AI)

| Cluster ID     | No. of Genomes                |                              | Percentage of Genomes Containing Cluster |        |      | Chi-squared test |           | Fisher's exact test | Gene ID | Predicted Protein Function | Membrane or Secretion Domains |                                                                           |   |
|----------------|-------------------------------|------------------------------|------------------------------------------|--------|------|------------------|-----------|---------------------|---------|----------------------------|-------------------------------|---------------------------------------------------------------------------|---|
|                | Present (≥0.8) <sup>a,b</sup> | Absent (<0.8) <sup>a,b</sup> | LI                                       | NSI+AI | % LI | % NSI+AI         | Greater % | p-value             |         |                            |                               | p-value                                                                   |   |
| Cluster_104965 | 4                             | 0                            | 20                                       | 37     | 17   | 0                | LI        | 4.16                | 0.0414  | 0.0204                     |                               | transposase family protein                                                | N |
| Cluster_106122 | 7                             | 2                            | 17                                       | 35     | 29   | 5                | LI        | 4.78                | 0.0288  | 0.0221                     |                               | conserved hypothetical protein                                            | N |
| Cluster_106126 | 6                             | 2                            | 18                                       | 35     | 25   | 5                | LI        | 3.34                | 0.0678  | 0.0481                     |                               | conserved hypothetical protein                                            | N |
| Cluster_107351 | 11                            | 7                            | 13                                       | 30     | 46   | 19               | LI        | 3.86                | 0.0495  | 0.0428                     |                               | conserved hypothetical protein                                            | N |
| Cluster_108475 | 4                             | 0                            | 20                                       | 37     | 17   | 0                | LI        | 4.16                | 0.0414  | 0.0204                     |                               | PLD-like domain protein                                                   | N |
| Cluster_112366 | 4                             | 18                           | 20                                       | 19     | 17   | 49               | NSI+AI    | 5.15                | 0.0233  | 0.0144                     |                               | mu-like prophage FljMu gp41 family protein                                | N |
| Cluster_11448  | 8                             | 4                            | 16                                       | 33     | 33   | 11               | LI        | 3.36                | 0.0669  | 0.0474                     |                               | conserved hypothetical protein                                            | Y |
| Cluster_115298 | 7                             | 2                            | 17                                       | 35     | 29   | 5                | LI        | 4.78                | 0.0288  | 0.0221                     |                               | conserved hypothetical protein                                            | N |
| Cluster_115308 | 6                             | 2                            | 18                                       | 35     | 25   | 5                | LI        | 3.34                | 0.0678  | 0.0481                     |                               | helix-turn-helix domain protein                                           | Y |
| Cluster_128751 | 7                             | 2                            | 17                                       | 35     | 29   | 5                | LI        | 4.78                | 0.0288  | 0.0221                     |                               | HNH endonuclease family protein                                           | N |
| Cluster_132534 | 7                             | 21                           | 17                                       | 16     | 29   | 57               | NSI+AI    | 3.42                | 0.0644  | 0.0403                     |                               | baseplate J-like family protein                                           | N |
| Cluster_13383  | 9                             | 4                            | 15                                       | 33     | 38   | 11               | LI        | 4.69                | 0.0303  | 0.0231                     |                               | conserved hypothetical protein                                            | N |
| Cluster_14414  | 10                            | 4                            | 14                                       | 33     | 42   | 11               | LI        | 6.19                | 0.0128  | 0.0108                     |                               | conserved hypothetical protein                                            | N |
| Cluster_14423  | 10                            | 5                            | 14                                       | 32     | 42   | 14               | LI        | 4.80                | 0.0285  | 0.0170                     |                               | conserved hypothetical protein                                            | N |
| Cluster_14627  | 5                             | 20                           | 19                                       | 17     | 21   | 54               | NSI+AI    | 5.34                | 0.0208  | 0.0159                     |                               | cysteine protease , YopT-type domain protein                              | N |
| Cluster_147640 | 11                            | 7                            | 13                                       | 30     | 46   | 19               | LI        | 3.86                | 0.0495  | 0.0428                     |                               | conserved hypothetical protein                                            | Y |
| Cluster_152085 | 6                             | 2                            | 18                                       | 35     | 25   | 5                | LI        | 3.34                | 0.0678  | 0.0481                     |                               | conserved hypothetical protein                                            | N |
| Cluster_166190 | 7                             | 2                            | 17                                       | 35     | 29   | 5                | LI        | 4.78                | 0.0288  | 0.0221                     |                               | phage integrase family protein                                            | N |
| Cluster_175131 | 6                             | 2                            | 18                                       | 35     | 25   | 5                | LI        | 3.34                | 0.0678  | 0.0481                     |                               | bacterial transferase hexapeptide family protein                          | N |
| Cluster_175134 | 6                             | 2                            | 18                                       | 35     | 25   | 5                | LI        | 3.34                | 0.0678  | 0.0481                     |                               | archaeal transcriptional regulator Tmb family protein                     | N |
| Cluster_175606 | 6                             | 0                            | 18                                       | 37     | 25   | 0                | LI        | 7.63                | 0.0057  | 0.0024                     | <i>fatA</i>                   | dTDP-6-deoxy-3,4-keto-hexulose isomerase                                  | N |
| Cluster_175608 | 5                             | 0                            | 19                                       | 37     | 21   | 0                | LI        | 5.86                | 0.0155  | 0.0071                     |                               | degT/DnrJ/EryC1/StrS aminotransferase family protein                      | N |
| Cluster_176094 | 6                             | 2                            | 18                                       | 35     | 25   | 5                | LI        | 3.34                | 0.0678  | 0.0481                     |                               | NIF3 family protein                                                       | N |
| Cluster_176098 | 6                             | 2                            | 18                                       | 35     | 25   | 5                | LI        | 3.34                | 0.0678  | 0.0481                     |                               | alpha amylase, catalytic domain protein                                   | N |
| Cluster_178309 | 22                            | 25                           | 2                                        | 12     | 92   | 68               | LI        | 3.52                | 0.0608  | 0.0335                     |                               | conserved hypothetical protein                                            | N |
| Cluster_19453  | 7                             | 21                           | 17                                       | 16     | 29   | 57               | NSI+AI    | 3.42                | 0.0644  | 0.0403                     |                               | ATPase subunit of terminase family protein                                | N |
| Cluster_221116 | 7                             | 3                            | 17                                       | 34     | 29   | 8                | LI        | 3.30                | 0.0693  | 0.0397                     |                               | hypothetical protein                                                      | N |
| Cluster_221922 | 6                             | 1                            | 18                                       | 36     | 25   | 3                | LI        | 5.10                | 0.0239  | 0.0122                     |                               | glycosyl transferase family 2 domain protein                              | N |
| Cluster_222331 | 16                            | 12                           | 8                                        | 25     | 67   | 32               | LI        | 5.56                | 0.0184  | 0.0171                     |                               | phage portal protein, HK97 family                                         | N |
| Cluster_222333 | 17                            | 13                           | 7                                        | 24     | 71   | 35               | LI        | 6.06                | 0.0138  | 0.0090                     |                               | phage major capsid protein, HK97 family                                   | N |
| Cluster_222426 | 8                             | 4                            | 16                                       | 33     | 33   | 11               | LI        | 3.36                | 0.0669  | 0.0474                     |                               | putative membrane protein                                                 | Y |
| Cluster_222636 | 6                             | 0                            | 18                                       | 37     | 25   | 0                | LI        | 7.63                | 0.0057  | 0.0024                     | <i>rfbA</i>                   | glucose-1-phosphate thymidyllyltransferase                                | N |
| Cluster_226605 | 8                             | 4                            | 16                                       | 33     | 33   | 11               | LI        | 3.36                | 0.0669  | 0.0474                     |                               | conserved hypothetical protein                                            | N |
| Cluster_227359 | 9                             | 4                            | 15                                       | 33     | 38   | 11               | LI        | 4.69                | 0.0303  | 0.0231                     |                               | conserved hypothetical protein                                            | N |
| Cluster_227360 | 9                             | 4                            | 15                                       | 33     | 38   | 11               | LI        | 4.69                | 0.0303  | 0.0231                     |                               | putative membrane protein                                                 | Y |
| Cluster_232670 | 5                             | 18                           | 19                                       | 19     | 21   | 49               | NSI+AI    | 3.68                | 0.0549  | 0.0340                     |                               | cysteine protease, YopT-type domain protein                               | N |
| Cluster_232949 | 7                             | 3                            | 17                                       | 34     | 29   | 8                | LI        | 3.30                | 0.0693  | 0.0397                     |                               | P22AR C-terminal domain protein                                           | N |
| Cluster_236134 | 16                            | 13                           | 8                                        | 24     | 67   | 35               | LI        | 4.61                | 0.0318  | 0.0201                     | <i>dhfrI</i>                  | dihydrofolate reductase type 1                                            | N |
| Cluster_237298 | 6                             | 2                            | 18                                       | 35     | 25   | 5                | LI        | 3.34                | 0.0678  | 0.0481                     |                               | conserved hypothetical protein                                            | N |
| Cluster_237299 | 6                             | 2                            | 18                                       | 35     | 25   | 5                | LI        | 3.34                | 0.0678  | 0.0481                     |                               | conserved hypothetical protein                                            | N |
| Cluster_239025 | 7                             | 2                            | 17                                       | 35     | 29   | 5                | LI        | 4.78                | 0.0288  | 0.0221                     |                               | phage terminase, small subunit, P27 family                                | N |
| Cluster_240829 | 7                             | 2                            | 17                                       | 35     | 29   | 5                | LI        | 4.78                | 0.0288  | 0.0221                     |                               | hypothetical protein                                                      | N |
| Cluster_242060 | 8                             | 4                            | 16                                       | 33     | 33   | 11               | LI        | 3.36                | 0.0669  | 0.0474                     |                               | hypothetical protein                                                      | N |
| Cluster_247401 | 6                             | 1                            | 18                                       | 36     | 25   | 3                | LI        | 5.10                | 0.0239  | 0.0122                     |                               | polysaccharide biosynthesis/export family protein                         | N |
| Cluster_247403 | 5                             | 0                            | 19                                       | 37     | 21   | 0                | LI        | 5.86                | 0.0155  | 0.0071                     |                               | glycosyl transferase 2 family protein                                     | N |
| Cluster_251045 | 8                             | 23                           | 16                                       | 14     | 33   | 62               | NSI+AI    | 3.76                | 0.0526  | 0.0374                     |                               | phage tail tape measure protein, TP901 family, core region                | Y |
| Cluster_252971 | 20                            | 18                           | 4                                        | 19     | 83   | 49               | LI        | 6.05                | 0.0139  | 0.0075                     |                               | HNH endonuclease family protein                                           | N |
| Cluster_25983  | 6                             | 2                            | 18                                       | 35     | 25   | 5                | LI        | 3.34                | 0.0678  | 0.0481                     |                               | bacteriophage replication gene A family protein                           | N |
| Cluster_260984 | 13                            | 8                            | 11                                       | 29     | 54   | 22               | LI        | 5.46                | 0.0194  | 0.0132                     | <i>traN</i>                   | type-F conjugative transfer system mating-pair stabilization protein TraN | Y |
| Cluster_261817 | 7                             | 2                            | 17                                       | 35     | 29   | 5                | LI        | 4.78                | 0.0288  | 0.0221                     |                               | putative predicted protein                                                | N |
| Cluster_262291 | 17                            | 34                           | 7                                        | 3      | 71   | 92               | NSI+AI    | 3.30                | 0.0693  | 0.0397                     |                               | type III secretion , HrpO family protein                                  | Y |
| Cluster_263945 | 7                             | 2                            | 17                                       | 35     | 29   | 5                | LI        | 4.78                | 0.0288  | 0.0221                     |                               | conserved hypothetical protein                                            | N |
| Cluster_264852 | 8                             | 23                           | 16                                       | 14     | 33   | 62               | NSI+AI    | 3.76                | 0.0526  | 0.0374                     |                               | phage tail tape measure protein, TP901 family, core region                | Y |
| Cluster_282545 | 8                             | 4                            | 16                                       | 33     | 33   | 11               | LI        | 3.36                | 0.0669  | 0.0474                     |                               | conserved hypothetical protein                                            | N |
| Cluster_282548 | 8                             | 4                            | 16                                       | 33     | 33   | 11               | LI        | 3.36                | 0.0669  | 0.0474                     |                               | putative predicted protein                                                | Y |
| Cluster_284853 | 4                             | 0                            | 20                                       | 37     | 17   | 0                | LI        | 4.16                | 0.0414  | 0.0204                     |                               | AAA domain protein                                                        | N |
| Cluster_28951  | 4                             | 0                            | 20                                       | 37     | 17   | 0                | LI        | 4.16                | 0.0414  | 0.0204                     |                               | hypothetical protein                                                      | N |

|                |    |    |    |    |    |    |        |      |        |        |             |                                                   |   |
|----------------|----|----|----|----|----|----|--------|------|--------|--------|-------------|---------------------------------------------------|---|
| Cluster_290675 | 5  | 18 | 19 | 19 | 21 | 49 | NSI+AI | 3.68 | 0.0549 | 0.0340 |             | phage late control gene D family protein          | N |
| Cluster_29580  | 7  | 2  | 17 | 35 | 29 | 5  | LI     | 4.78 | 0.0288 | 0.0221 |             | phage Terminase family protein                    | N |
| Cluster_297348 | 0  | 7  | 24 | 30 | 0  | 19 | NSI+AI | 3.44 | 0.0638 | 0.0358 |             | hypothetical protein                              | N |
| Cluster_305186 | 5  | 18 | 19 | 19 | 21 | 49 | NSI+AI | 3.68 | 0.0549 | 0.0340 |             | phage P2 GpU family protein                       | Y |
| Cluster_307935 | 0  | 7  | 24 | 30 | 0  | 19 | NSI+AI | 3.44 | 0.0638 | 0.0358 |             | conserved hypothetical protein                    | N |
| Cluster_312709 | 6  | 2  | 18 | 35 | 25 | 5  | LI     | 3.34 | 0.0678 | 0.0481 |             | amino acid permease family protein                | Y |
| Cluster_312794 | 11 | 7  | 13 | 30 | 46 | 19 | LI     | 3.86 | 0.0495 | 0.0428 |             | transposase DDE domain protein                    | N |
| Cluster_313403 | 8  | 4  | 16 | 33 | 33 | 11 | LI     | 3.36 | 0.0669 | 0.0474 | <i>repA</i> | regulatory protein RepA                           | Y |
| Cluster_313404 | 8  | 4  | 16 | 33 | 33 | 11 | LI     | 3.36 | 0.0669 | 0.0474 |             | prophage CP4-57 regulatory family protein         | N |
| Cluster_313405 | 8  | 4  | 16 | 33 | 33 | 11 | LI     | 3.36 | 0.0669 | 0.0474 |             | luxR family transcriptional regulator             | N |
| Cluster_315365 | 6  | 2  | 18 | 35 | 25 | 5  | LI     | 3.34 | 0.0678 | 0.0481 |             | ABC transporter family protein                    | Y |
| Cluster_316214 | 6  | 2  | 18 | 35 | 25 | 5  | LI     | 3.34 | 0.0678 | 0.0481 |             | tatD related DNase family protein                 | N |
| Cluster_317552 | 7  | 2  | 17 | 35 | 29 | 5  | LI     | 4.78 | 0.0288 | 0.0221 |             | conserved hypothetical protein                    | N |
| Cluster_42814  | 4  | 16 | 20 | 21 | 17 | 43 | NSI+AI | 3.54 | 0.0600 | 0.0496 |             | glycosyltransferase like 2 family protein         | N |
| Cluster_43605  | 18 | 17 | 6  | 20 | 75 | 46 | LI     | 3.91 | 0.0481 | 0.0347 |             | HNH endonuclease family protein                   | N |
| Cluster_51447  | 7  | 21 | 17 | 16 | 29 | 57 | NSI+AI | 3.42 | 0.0644 | 0.0403 |             | ATPase subunit of terminase family protein        | N |
| Cluster_54306  | 4  | 0  | 20 | 37 | 17 | 0  | LI     | 4.16 | 0.0414 | 0.0204 |             | putative yahA protein                             | N |
| Cluster_58277  | 10 | 4  | 14 | 33 | 42 | 11 | LI     | 6.19 | 0.0128 | 0.0108 |             | helix-turn-helix, Psq domain protein              | N |
| Cluster_59004  | 17 | 13 | 7  | 24 | 71 | 35 | LI     | 6.06 | 0.0138 | 0.0090 |             | phage prohead protease, HK97 family               | N |
| Cluster_74193  | 7  | 2  | 17 | 35 | 29 | 5  | LI     | 4.78 | 0.0288 | 0.0221 |             | phage major capsid E family protein               | N |
| Cluster_82368  | 6  | 2  | 18 | 35 | 25 | 5  | LI     | 3.34 | 0.0678 | 0.0481 | <i>fljC</i> | flagellin                                         | N |
| Cluster_83254  | 6  | 1  | 18 | 36 | 25 | 3  | LI     | 5.10 | 0.0239 | 0.0122 |             | glycosyl transferases group 1 family protein      | N |
| Cluster_83926  | 5  | 0  | 19 | 37 | 21 | 0  | LI     | 5.86 | 0.0155 | 0.0071 |             | acetyltransferase domain protein                  | N |
| Cluster_83929  | 6  | 1  | 18 | 36 | 25 | 3  | LI     | 5.10 | 0.0239 | 0.0122 | <i>rtbB</i> | dTDP-glucose 4,6-dehydratase                      | N |
| Cluster_84063  | 6  | 1  | 18 | 36 | 25 | 3  | LI     | 5.10 | 0.0239 | 0.0122 |             | polysaccharide biosynthesis/export family protein | Y |
| Cluster_95058  | 7  | 3  | 17 | 34 | 29 | 8  | LI     | 3.30 | 0.0693 | 0.0397 |             | putative antirepressor protein                    | N |
| Cluster_97528  | 8  | 4  | 16 | 33 | 33 | 11 | LI     | 3.36 | 0.0669 | 0.0474 |             | ead/Ea22-like family protein                      | N |
| Cluster_98923  | 17 | 15 | 7  | 22 | 71 | 41 | LI     | 4.21 | 0.0402 | 0.0350 |             | bacteriophage lysis family protein                | Y |
| Cluster_99077  | 4  | 16 | 20 | 21 | 17 | 43 | NSI+AI | 3.54 | 0.0600 | 0.0496 |             | cysteine protease , YopT-type domain protein      | N |

<sup>a</sup>Genes were grouped into gene clusters using an "inclusive" clustering threshold of ≥80% nucleotide identity.

<sup>b</sup>Gene clusters identified as "present" have a TBLASTN LS-BSR ≥0.8, while those that are "absent" have a TBLASTN LS-BSR <0.8.

<sup>c</sup>Clinical outcomes are classified as lethal (LI), non-lethal symptomatic (NSI), and asymptomatic (AI).

**Table S10.** The number of LS-BSR gene clusters with a predicted protein that contained a protein domain of surface-associated or secreted proteins

| Clinical Outcomes <sup>b</sup> | No. of Gene Clusters <sup>a</sup> |                                              |                            |
|--------------------------------|-----------------------------------|----------------------------------------------|----------------------------|
|                                | All EPEC Genomes <sup>c</sup>     | Significant in Both Comparisons <sup>d</sup> | TEPEC Genomes <sup>e</sup> |
| LI vs. AI                      | 40                                | 13                                           | 31                         |
| LI vs. NSI                     | 11                                | 2                                            | 2                          |
| NSI vs. AI                     | 14                                | 9                                            | 21                         |
| Symptomatic vs. Asymptomatic   | 50                                | 19                                           | 31                         |
| Lethal vs. Non-Lethal          | 28                                | 8                                            | 16                         |

<sup>a</sup>The number of gene clusters with one or more predicted surface-associated or secreted protein domains that were significantly ( $p < 0.05$ ) associated with genomes of one clinical outcome over another that were not present (LS-BSR value  $< 0.8$ ) in any of the three commensal *E. coli* genomes.

<sup>b</sup>The clinical outcomes are lethal (LI), non-lethal symptomatic (NSI), asymptomatic (AI), symptomatic (LI+NSI), or non-lethal (NSI+AI).

<sup>c</sup>The number of gene clusters that were significantly associated with symptomatic or asymptomatic genomes when all 70 genomes were compared, which included both typical EPEC and atypical EPEC.

<sup>d</sup>The number of gene clusters that were significantly associated with symptomatic or asymptomatic genomes in the comparison with all 70 genomes, and also the comparison with only the 61 typical EPEC genomes.

<sup>e</sup>The number of gene clusters that were significantly associated with symptomatic or asymptomatic genomes when comparing the 61 typical EPEC genomes only.
